# Supplementary material for: The Genomic Architecture of Pregnancy-Associated Plasticity in the Maternal Mouse Hippocampus
Source: eNeuro. 2022 Sep 21;9(5):ENEURO.0117-22.2022. doi: 10.1523/ENEURO.0117-22.2022 (PMC9522463; doi:10.1523/ENEURO.0117-22.2022)
Supplement: Extended Data Figure 1-1 — Table of AUROC values by cell type for SVM model for cell type identification in snRNA-seq. The table displays the cell type, number of cells (n), number of features in the model, model type, AUROC value, sensitivity, and specificity. Download Figure 1-1, XLS file. [file enu-eN-NWR-0117-22-s06.xls]

## Sheet: Sheet1
Cell type	n	Features	Method	AUROC	Sensitivity	Specificity
Astrocytes	3119	50	svmRadial	1	0.993	1
Endothelial	746	50	svmRadial	1	0.843	1
Microglia	636	50	svmRadial	1	0.869	1
Oligodendrocytes	7685	50	svmRadial	1	0.983	1
Pvalb	31088	50	svmRadial	1	0.963	1
Sncg	11573	50	svmRadial	1	0.908	0.999
Sst	42310	50	svmRadial	1	0.97	0.999
Vip	41626	50	svmRadial	1	0.979	1
CA1 Pyramidal	13221	50	svmRadial	1	0.998	1
CA3 Pyramidal	1899	50	svmRadial	1	0.958	1
DG Granule cells	58566	50	svmRadial	1	0.999	1
