# Supplementary material for: The Genomic Architecture of Pregnancy-Associated Plasticity in the Maternal Mouse Hippocampus
Source: eNeuro. 2022 Sep 21;9(5):ENEURO.0117-22.2022. doi: 10.1523/ENEURO.0117-22.2022 (PMC9522463; doi:10.1523/ENEURO.0117-22.2022)
Supplement: Extended Data Figure 3-1 — Table of differential gene expression results from snRNA-seq between virgin, E18, and postpartum conditions. Each tab of the file contains results of differential gene expression analysis in a specific cell type, organized by pairwise comparison between conditions (virgin, E18, and postpartum). The results list the gene of interest, p-value, adjusted p-value, average log2 fold change, FDR, pairwise comparison, and cell type. Download Figure 3-1, XLS file. [file enu-eN-NWR-0117-22-s01.xls]

## Sheet: CA1 VvsE18
p_val	avg_log2FC	p_val_adj	gene	comparison	celltype	fdr
0	3.00662	0	Ttr	Virgin_vs_E18	CA1	0
1.48562e-211	2.07216	3.52834e-207	Enpp2	Virgin_vs_E18	CA1	4.36846e-208
9.86178e-68	1.03978	2.34217e-63	Kl	Virgin_vs_E18	CA1	1.93324e-64
1.36168e-28	0.646055	3.234e-24	Mid1	Virgin_vs_E18	CA1	1.00101e-25
9.15027e-28	0.571318	2.17319e-23	Igf2	Virgin_vs_E18	CA1	5.97919e-25
2.06888e-11	0.470918	4.9136e-07	Pcdh15	Virgin_vs_E18	CA1	2.82956e-09
1.23187e-19	0.461964	2.92569e-15	Hbb-bs	Virgin_vs_E18	CA1	4.52789e-17
2.51922e-10	0.427839	5.98315e-06	Atp2b4	Virgin_vs_E18	CA1	2.90501e-08
4.37283e-13	0.417748	1.03855e-08	Clk1	Virgin_vs_E18	CA1	7.7929e-11
1.02267e-08	0.391775	0.000242884	Exd2	Virgin_vs_E18	CA1	7.81081e-07
3.2381e-11	0.371898	7.69049e-07	Itch	Virgin_vs_E18	CA1	4.23184e-09
5.26572e-10	0.361437	1.25061e-05	A330023F24Rik	Virgin_vs_E18	CA1	5.52995e-08
2.00236e-09	0.357665	4.75562e-05	Dlx6	Virgin_vs_E18	CA1	1.83999e-07
8.69501e-09	0.353379	0.000206506	Prlr	Virgin_vs_E18	CA1	6.72834e-07
4.43278e-09	0.342992	0.000105278	Tenm4	Virgin_vs_E18	CA1	3.67171e-07
1.53347e-09	0.341788	3.642e-05	Mir124a-1hg	Virgin_vs_E18	CA1	1.45457e-07
1.45743e-07	0.322052	0.0034614	Erdr1	Virgin_vs_E18	CA1	7.79196e-06
8.84051e-07	0.321544	0.0209962	Dmxl1	Virgin_vs_E18	CA1	3.63574e-05
4.92553e-08	0.317202	0.00116981	Camk2d	Virgin_vs_E18	CA1	3.04916e-06
7.00605e-12	0.311766	1.66394e-07	Fubp1	Virgin_vs_E18	CA1	1.00494e-09
2.31127e-07	0.308122	0.00548927	Apoe	Virgin_vs_E18	CA1	1.12336e-05
2.1443e-11	0.306548	5.0927e-07	Tra2a	Virgin_vs_E18	CA1	2.86605e-09
2.42116e-07	0.305521	0.00575026	Pom121	Virgin_vs_E18	CA1	1.16712e-05
0.0603465	0.305244	1	Pip5k1b	Virgin_vs_E18	CA1	0.206336
1.89582e-05	0.304981	0.450256	Tshz3	Virgin_vs_E18	CA1	0.000497737
1.02921e-06	0.304941	0.0244436	Fyco1	Virgin_vs_E18	CA1	4.17432e-05
1.42589e-08	0.302997	0.00033865	Phkg1	Virgin_vs_E18	CA1	1.03527e-06
1.07857e-06	0.301786	0.025616	A830008E24Rik	Virgin_vs_E18	CA1	4.34456e-05
7.81044e-06	0.30045	0.185498	Adcyap1r1	Virgin_vs_E18	CA1	0.000234281
2.63986e-08	0.300069	0.000626966	Wdr31	Virgin_vs_E18	CA1	1.7642e-06
1.35211e-06	0.297476	0.0321125	Car10	Virgin_vs_E18	CA1	5.26605e-05
0.000156299	0.296845	1	Mllt10	Virgin_vs_E18	CA1	0.00292736
6.65769e-06	0.296708	0.15812	Atp1a2	Virgin_vs_E18	CA1	0.000207164
1.52775e-07	0.293277	0.00362842	Snrpc	Virgin_vs_E18	CA1	8.02207e-06
5.81338e-05	0.292267	1	Fnbp1	Virgin_vs_E18	CA1	0.0013049
9.59723e-05	0.292219	1	Sqle	Virgin_vs_E18	CA1	0.0019804
4.2011e-06	0.291934	0.0997761	Lingo2	Virgin_vs_E18	CA1	0.000137232
0.000135084	0.291821	1	Rxfp1	Virgin_vs_E18	CA1	0.00262188
1.31423e-06	0.290897	0.0312129	Ythdc2	Virgin_vs_E18	CA1	5.15265e-05
2.93501e-09	0.290879	6.97065e-05	9930111J21Rik2	Virgin_vs_E18	CA1	2.55553e-07
8.03023e-13	0.290544	1.90718e-08	Lin54	Virgin_vs_E18	CA1	1.31183e-10
4.60155e-06	0.29053	0.109287	Sag	Virgin_vs_E18	CA1	0.000147878
1.39206e-06	0.287998	0.0330613	Brip1os	Virgin_vs_E18	CA1	5.38597e-05
1.12846e-06	0.286321	0.0268009	Slc39a10	Virgin_vs_E18	CA1	4.5146e-05
3.56994e-06	0.283057	0.084786	Gm26737	Virgin_vs_E18	CA1	0.000121357
2.33843e-05	0.279683	0.555376	Sox11	Virgin_vs_E18	CA1	0.000597925
1.97949e-08	0.279361	0.000470128	Ccdc62	Virgin_vs_E18	CA1	1.38588e-06
2.21566e-06	0.278007	0.0526219	A430073D23Rik	Virgin_vs_E18	CA1	8.04339e-05
2.63768e-07	0.277076	0.00626448	Samhd1	Virgin_vs_E18	CA1	1.25098e-05
2.95487e-09	0.275322	7.01783e-05	Gm42669	Virgin_vs_E18	CA1	2.55553e-07
8.65063e-05	0.273526	1	Pitpnm3	Virgin_vs_E18	CA1	0.00183688
2.91093e-10	0.272304	6.91345e-06	Gm7609	Virgin_vs_E18	CA1	3.23003e-08
7.1872e-06	0.269176	0.170696	Srsf11	Virgin_vs_E18	CA1	0.000219005
2.09486e-07	0.268418	0.00497528	Schip1	Virgin_vs_E18	CA1	1.03961e-05
4.29572e-05	0.265137	1	Clstn2	Virgin_vs_E18	CA1	0.00101053
3.45166e-11	0.263018	8.1977e-07	Snhg14	Virgin_vs_E18	CA1	4.41288e-09
3.69882e-06	0.26262	0.087847	Wsb1	Virgin_vs_E18	CA1	0.000125016
1.26537e-07	0.261882	0.00300525	Bcas2	Virgin_vs_E18	CA1	6.89041e-06
1.62231e-06	0.261759	0.0385299	BC051077	Virgin_vs_E18	CA1	6.08765e-05
1.61021e-06	0.261177	0.0382426	Krit1	Virgin_vs_E18	CA1	6.08765e-05
0.00168349	0.260803	1	Slc12a2	Virgin_vs_E18	CA1	0.0188582
0.000109866	0.259645	1	Gas6	Virgin_vs_E18	CA1	0.00223573
2.93671e-07	0.259355	0.00697468	Steap2	Virgin_vs_E18	CA1	1.3517e-05
3.6831e-05	0.258759	0.874736	C920009B18Rik	Virgin_vs_E18	CA1	0.0008805
5.50361e-07	0.25844	0.0130711	Rmi2	Virgin_vs_E18	CA1	2.41543e-05
0.000159118	0.258138	1	Cntn3	Virgin_vs_E18	CA1	0.00297072
0.00106878	0.257412	1	Slc30a3	Virgin_vs_E18	CA1	0.0134339
4.54392e-05	0.256475	1	Clk4	Virgin_vs_E18	CA1	0.00106043
2.03657e-05	0.25444	0.483685	Hpgds	Virgin_vs_E18	CA1	0.00052531
0.00647152	0.254177	1	Kcnd3	Virgin_vs_E18	CA1	0.0502126
6.74964e-08	0.253994	0.00160304	Ttf1	Virgin_vs_E18	CA1	4.04254e-06
9.59126e-05	0.253635	1	Mirg	Virgin_vs_E18	CA1	0.0019804
2.0892e-06	0.253208	0.0496186	Oxr1	Virgin_vs_E18	CA1	7.67913e-05
1.53885e-05	0.25268	0.365476	Yeats2	Virgin_vs_E18	CA1	0.000420928
6.97985e-06	0.2525	0.165772	Slc28a3	Virgin_vs_E18	CA1	0.000213794
0.000433699	0.251861	1	Kcnma1	Virgin_vs_E18	CA1	0.00659066
0.000234412	0.251475	1	Slc1a2	Virgin_vs_E18	CA1	0.00397284
0.00168682	0.251042	1	Tmem255a	Virgin_vs_E18	CA1	0.0188597
0.000175325	0.250746	1	Tmtc3	Virgin_vs_E18	CA1	0.00321211
0.000112437	0.25068	1	Pik3c2a	Virgin_vs_E18	CA1	0.00227878
1.86303e-05	0.248877	0.442471	Gm38393	Virgin_vs_E18	CA1	0.000491323
6.43581e-06	0.248469	0.152851	Mtg2	Virgin_vs_E18	CA1	0.000201325
0.000831426	0.248449	1	Ctage5	Virgin_vs_E18	CA1	0.010974
2.96944e-06	0.247111	0.0705241	AU022252	Virgin_vs_E18	CA1	0.000102725
0.0040171	0.246845	1	Mfsd14a	Virgin_vs_E18	CA1	0.0356867
1.04682e-05	0.24614	0.248619	Hsp90b1	Virgin_vs_E18	CA1	0.000298851
6.13408e-05	0.245887	1	Rab10os	Virgin_vs_E18	CA1	0.00135111
8.59417e-05	0.244741	1	Rhox8	Virgin_vs_E18	CA1	0.00183688
1.24522e-09	0.242807	2.95739e-05	Aplp1	Virgin_vs_E18	CA1	1.22052e-07
0.000765773	0.242183	1	Chfr	Virgin_vs_E18	CA1	0.010282
0.000104449	0.242022	1	Glul	Virgin_vs_E18	CA1	0.00214778
0.000198247	0.241323	1	Tet2	Virgin_vs_E18	CA1	0.00352234
3.64416e-05	0.240792	0.865488	Tbc1d24	Virgin_vs_E18	CA1	0.000874747
6.75445e-05	0.239364	1	Ticrr	Virgin_vs_E18	CA1	0.00147122
4.77977e-10	0.238083	1.1352e-05	Plp1	Virgin_vs_E18	CA1	5.11088e-08
0.000290815	0.237732	1	Clu	Virgin_vs_E18	CA1	0.00479071
1.14702e-07	0.235499	0.00272417	Chd1	Virgin_vs_E18	CA1	6.33958e-06
1.47225e-07	0.235251	0.00349658	Ptgds	Virgin_vs_E18	CA1	7.80025e-06
3.61676e-05	0.23515	0.85898	Grin2b	Virgin_vs_E18	CA1	0.000871728
0.000229816	0.234765	1	Pcnx4	Virgin_vs_E18	CA1	0.00390621
0.000431694	0.23423	1	Fxyd6	Virgin_vs_E18	CA1	0.00657718
0.00492669	0.234096	1	Pcp4	Virgin_vs_E18	CA1	0.0406937
0.000412783	0.234092	1	Tmtc4	Virgin_vs_E18	CA1	0.00637159
0.000830893	0.23397	1	Cd81	Virgin_vs_E18	CA1	0.010974
0.000451869	0.233773	1	Rbm28	Virgin_vs_E18	CA1	0.00684907
0.000385743	0.23376	1	Ptpre	Virgin_vs_E18	CA1	0.00600147
0.00147658	0.233649	1	Phf3	Virgin_vs_E18	CA1	0.017027
2.84478e-06	0.232351	0.0675634	Nbea	Virgin_vs_E18	CA1	9.89948e-05
1.73605e-05	0.231159	0.412313	Slc23a1	Virgin_vs_E18	CA1	0.000466198
4.58486e-05	0.230704	1	Rnf165	Virgin_vs_E18	CA1	0.00106575
5.36669e-22	0.230662	1.27459e-17	Snhg11	Virgin_vs_E18	CA1	2.63013e-19
1.75831e-05	0.230455	0.417598	Rbm39	Virgin_vs_E18	CA1	0.000470028
1.8142e-05	0.230415	0.430872	Cst3	Virgin_vs_E18	CA1	0.000480599
0.000194179	0.230085	1	Chuk	Virgin_vs_E18	CA1	0.00347057
4.62241e-05	0.229897	1	Rab33b	Virgin_vs_E18	CA1	0.00107025
0.00033869	0.229295	1	Dusp11	Virgin_vs_E18	CA1	0.00548715
0.000223722	0.229186	1	Gm10660	Virgin_vs_E18	CA1	0.00386536
0.000247157	0.229133	1	Irf9	Virgin_vs_E18	CA1	0.00415294
9.80307e-06	0.22774	0.232823	Gm21750	Virgin_vs_E18	CA1	0.000283999
9.48686e-05	0.227529	1	Uggt1	Virgin_vs_E18	CA1	0.00197146
0.000267668	0.227382	1	Swt1	Virgin_vs_E18	CA1	0.00447397
0.00264212	0.227041	1	Mbtd1	Virgin_vs_E18	CA1	0.026246
0.000533476	0.225417	1	Dnajc3	Virgin_vs_E18	CA1	0.00776577
0.00105869	0.22483	1	Car2	Virgin_vs_E18	CA1	0.0134184
7.95574e-05	0.224424	1	Cav2	Virgin_vs_E18	CA1	0.00171384
0.00864854	0.223283	1	Ier5	Virgin_vs_E18	CA1	0.0617258
0.000528513	0.22291	1	Mef2c	Virgin_vs_E18	CA1	0.00771262
0.000309167	0.222034	1	Timp2	Virgin_vs_E18	CA1	0.00506466
6.92743e-05	0.221938	1	Stxbp2	Virgin_vs_E18	CA1	0.00150333
0.000354065	0.221764	1	Edil3	Virgin_vs_E18	CA1	0.00564306
0.000209752	0.221118	1	Nxf1	Virgin_vs_E18	CA1	0.00369326
3.5703e-05	0.220817	0.847946	Hspa5	Virgin_vs_E18	CA1	0.000864071
2.8473e-07	0.220567	0.00676234	Ptprd	Virgin_vs_E18	CA1	1.32897e-05
0.000303369	0.219306	1	Npc1	Virgin_vs_E18	CA1	0.00498356
0.00165629	0.218221	1	Kcnj9	Virgin_vs_E18	CA1	0.018589
2.35001e-05	0.218208	0.558127	Mbp	Virgin_vs_E18	CA1	0.000598285
0.0317413	0.218152	1	Hs6st2	Virgin_vs_E18	CA1	0.139112
0.000564335	0.218036	1	Cox20	Virgin_vs_E18	CA1	0.00804351
0.0160037	0.217828	1	Rab9	Virgin_vs_E18	CA1	0.0928329
0.000477158	0.217747	1	Nudt5	Virgin_vs_E18	CA1	0.00715859
0.000486029	0.217567	1	Park2	Virgin_vs_E18	CA1	0.0072363
0.002147	0.217546	1	Plpp3	Virgin_vs_E18	CA1	0.0226754
0.00103842	0.217457	1	4632427E13Rik	Virgin_vs_E18	CA1	0.0132471
0.000155933	0.217299	1	Tulp4	Virgin_vs_E18	CA1	0.00292736
9.02597e-06	0.216452	0.214367	R3hdm1	Virgin_vs_E18	CA1	0.000265409
0.0013493	0.215911	1	Slc38a2	Virgin_vs_E18	CA1	0.0160537
0.00249082	0.215897	1	Dock7	Virgin_vs_E18	CA1	0.0251573
0.00286213	0.21575	1	Lrp8	Virgin_vs_E18	CA1	0.0275827
0.00253946	0.214951	1	Spock3	Virgin_vs_E18	CA1	0.0254856
0.000352562	0.214653	1	Aig1	Virgin_vs_E18	CA1	0.00564306
0.00164007	0.214401	1	Car12	Virgin_vs_E18	CA1	0.0184422
0.00017949	0.214132	1	Abcc5	Virgin_vs_E18	CA1	0.00326806
0.000706677	0.21378	1	Pdia6	Virgin_vs_E18	CA1	0.0095984
0.0171498	0.212036	1	Idi1	Virgin_vs_E18	CA1	0.0965271
5.19935e-05	0.211808	1	C2cd5	Virgin_vs_E18	CA1	0.00118059
4.05623e-05	0.211191	0.963354	AB041806	Virgin_vs_E18	CA1	0.000961882
3.53812e-05	0.209872	0.840303	Sparcl1	Virgin_vs_E18	CA1	0.000859821
0.00065217	0.209581	1	Tctn2	Virgin_vs_E18	CA1	0.00900331
0.000373752	0.209205	1	Cit	Virgin_vs_E18	CA1	0.00584583
0.0139223	0.20917	1	Kcnk1	Virgin_vs_E18	CA1	0.0855672
0.000164346	0.20846	1	Dubr	Virgin_vs_E18	CA1	0.00304896
0.000888904	0.208027	1	Nav2	Virgin_vs_E18	CA1	0.011617
0.00254897	0.207989	1	Unc5d	Virgin_vs_E18	CA1	0.0255375
0.00136652	0.207828	1	Zcchc11	Virgin_vs_E18	CA1	0.0161207
0.000459559	0.207643	1	Usp40	Virgin_vs_E18	CA1	0.00694773
8.18823e-07	0.207523	0.019447	Mme	Virgin_vs_E18	CA1	3.41525e-05
8.78434e-05	0.206666	1	Nnat	Virgin_vs_E18	CA1	0.00183979
0.000221847	0.206639	1	Snx21	Virgin_vs_E18	CA1	0.00385155
0.0022868	0.206429	1	Cmtr1	Virgin_vs_E18	CA1	0.0235528
0.000504145	0.206059	1	Sparc	Virgin_vs_E18	CA1	0.00743077
0.00355316	0.205776	1	Atp1b3	Virgin_vs_E18	CA1	0.0327525
0.0142919	0.205744	1	Plcxd2	Virgin_vs_E18	CA1	0.0869297
0.00312678	0.20574	1	Sclt1	Virgin_vs_E18	CA1	0.0296113
1.64433e-06	0.205497	0.0390528	Bicd1	Virgin_vs_E18	CA1	6.12044e-05
2.82303e-05	0.204932	0.67047	Ccnt2	Virgin_vs_E18	CA1	0.000706479
1.54989e-07	0.203643	0.00368098	Gm4117	Virgin_vs_E18	CA1	8.06627e-06
0.00180945	0.202855	1	Aldoc	Virgin_vs_E18	CA1	0.0198904
6.85238e-06	0.202744	0.162744	Ttc14	Virgin_vs_E18	CA1	0.000210989
4.91648e-05	0.202253	1	Chd4	Virgin_vs_E18	CA1	0.00113388
0.00843539	0.20222	1	Hipk1	Virgin_vs_E18	CA1	0.0605721
0.00532871	0.202002	1	Xbp1	Virgin_vs_E18	CA1	0.0432847
0.0115088	0.201847	1	Slc1a3	Virgin_vs_E18	CA1	0.0757084
0.00415211	0.201435	1	Htatsf1	Virgin_vs_E18	CA1	0.036342
0.00133139	0.201208	1	Cyp46a1	Virgin_vs_E18	CA1	0.0158966
0.00422624	0.201138	1	Brd8	Virgin_vs_E18	CA1	0.0368761
0.000547937	0.201029	1	Gm17494	Virgin_vs_E18	CA1	0.00791748
0.00172163	0.200498	1	Nin	Virgin_vs_E18	CA1	0.0191035
0.0202469	0.200141	1	Myef2	Virgin_vs_E18	CA1	0.107061
0.00351051	0.200102	1	Ccdc30	Virgin_vs_E18	CA1	0.0325075
0.0324556	0.199947	1	Spcs2	Virgin_vs_E18	CA1	0.140416
0.000800466	0.199716	1	Sgsm1	Virgin_vs_E18	CA1	0.0106747
3.966e-06	0.199452	0.0941925	C2cd3	Virgin_vs_E18	CA1	0.000132058
0.00224241	0.199384	1	Hist3h2a	Virgin_vs_E18	CA1	0.0232176
0.000239453	0.199091	1	Spock2	Virgin_vs_E18	CA1	0.00404661
0.00519178	0.198963	1	Emc3	Virgin_vs_E18	CA1	0.0425249
0.0138932	0.198303	1	Hdac7	Virgin_vs_E18	CA1	0.0855559
1.38389e-14	0.19824	3.28675e-10	H2-Q4	Virgin_vs_E18	CA1	2.71289e-12
1.01132e-05	0.197713	0.240188	Nktr	Virgin_vs_E18	CA1	0.000291547
0.000155865	0.196791	1	Fsd1l	Virgin_vs_E18	CA1	0.00292736
0.0053802	0.196583	1	Msantd2	Virgin_vs_E18	CA1	0.0435227
0.000618714	0.196262	1	Dtna	Virgin_vs_E18	CA1	0.00860203
0.000282131	0.196234	1	Pcsk2	Virgin_vs_E18	CA1	0.00468703
0.0164459	0.196034	1	Htr2c	Virgin_vs_E18	CA1	0.0945438
0.000563669	0.195436	1	Cd200	Virgin_vs_E18	CA1	0.00804351
0.000602701	0.195365	1	Tcirg1	Virgin_vs_E18	CA1	0.0084192
7.74648e-08	0.19522	0.00183979	D10Wsu102e	Virgin_vs_E18	CA1	4.5106e-06
0.012978	0.194436	1	Dmtf1	Virgin_vs_E18	CA1	0.0813686
0.000369408	0.194289	1	Arpp21	Virgin_vs_E18	CA1	0.00580141
4.27818e-05	0.194079	1	Rufy2	Virgin_vs_E18	CA1	0.00101044
0.000582397	0.193852	1	Ftx	Virgin_vs_E18	CA1	0.00817441
0.000569586	0.193583	1	Ankrd11	Virgin_vs_E18	CA1	0.00809115
0.00977206	0.192805	1	Wnk1	Virgin_vs_E18	CA1	0.0680918
0.000693424	0.192757	1	Pkib	Virgin_vs_E18	CA1	0.00948379
0.0249152	0.192684	1	Igfbp5	Virgin_vs_E18	CA1	0.120996
0.00455907	0.192682	1	Kcnq2	Virgin_vs_E18	CA1	0.0387455
0.00158991	0.19259	1	Mier1	Virgin_vs_E18	CA1	0.0180856
0.0104629	0.19206	1	Zdhhc21	Virgin_vs_E18	CA1	0.0713831
0.0147869	0.191855	1	Scmh1	Virgin_vs_E18	CA1	0.0888273
0.00122648	0.191621	1	Cflar	Virgin_vs_E18	CA1	0.0150336
0.00174486	0.191388	1	Pycr2	Virgin_vs_E18	CA1	0.0193249
0.00258253	0.190802	1	Tango2	Virgin_vs_E18	CA1	0.0258297
0.0506133	0.190695	1	Uimc1	Virgin_vs_E18	CA1	0.186385
0.0115874	0.190642	1	Prkab2	Virgin_vs_E18	CA1	0.0757214
0.000483203	0.190353	1	Gm21897	Virgin_vs_E18	CA1	0.00721247
0.00202773	0.189364	1	Dbf4	Virgin_vs_E18	CA1	0.0219211
0.00151778	0.188827	1	G530011O06Rik	Virgin_vs_E18	CA1	0.0173998
0.00490072	0.188497	1	BC005537	Virgin_vs_E18	CA1	0.0405932
0.000948733	0.188181	1	March7	Virgin_vs_E18	CA1	0.0123168
0.00618967	0.187801	1	Pde7a	Virgin_vs_E18	CA1	0.0485353
4.3316e-07	0.187719	0.0102876	Fgd4	Virgin_vs_E18	CA1	1.92986e-05
0.0100484	0.18742	1	Gatad2b	Virgin_vs_E18	CA1	0.0693597
0.0037593	0.187043	1	Klhl7	Virgin_vs_E18	CA1	0.0341707
0.00219522	0.186988	1	Trmt1l	Virgin_vs_E18	CA1	0.0228902
0.00123787	0.186682	1	Mest	Virgin_vs_E18	CA1	0.0151224
1.43614e-05	0.186633	0.341082	Ttc3	Virgin_vs_E18	CA1	0.000394669
0.0012639	0.186226	1	Mfsd4b5	Virgin_vs_E18	CA1	0.0152819
0.00137876	0.186201	1	Slco3a1	Virgin_vs_E18	CA1	0.0161847
0.00240347	0.18494	1	Ap4e1	Virgin_vs_E18	CA1	0.0245396
0.00319157	0.184765	1	Msi2	Virgin_vs_E18	CA1	0.0301278
0.00162291	0.18474	1	Ccpg1os	Virgin_vs_E18	CA1	0.0183192
0.00178634	0.184701	1	Fam184a	Virgin_vs_E18	CA1	0.0197101
0.000105775	0.184645	1	Cck	Virgin_vs_E18	CA1	0.00216747
0.0141831	0.18464	1	2810474O19Rik	Virgin_vs_E18	CA1	0.0866158
0.000748889	0.184348	1	Nfxl1	Virgin_vs_E18	CA1	0.0101014
0.00933338	0.184345	1	Rcor1	Virgin_vs_E18	CA1	0.0654226
0.000430707	0.184235	1	Lgi2	Virgin_vs_E18	CA1	0.00657718
0.0165598	0.183512	1	Zc3h7a	Virgin_vs_E18	CA1	0.0947358
0.00822751	0.183006	1	Arhgap17	Virgin_vs_E18	CA1	0.0596616
0.00119523	0.182759	1	Xpr1	Virgin_vs_E18	CA1	0.0147361
0.0267006	0.182394	1	Bhlhe41	Virgin_vs_E18	CA1	0.126227
0.00136783	0.182376	1	Cdk8	Virgin_vs_E18	CA1	0.0161207
0.0275719	0.182351	1	Kansl3	Virgin_vs_E18	CA1	0.128691
0.00124456	0.182159	1	Slc5a3	Virgin_vs_E18	CA1	0.0151224
0.0308141	0.182096	1	Yipf4	Virgin_vs_E18	CA1	0.13739
0.0075903	0.181995	1	Atp6v0e	Virgin_vs_E18	CA1	0.0561491
0.00337214	0.181724	1	Arhgap20	Virgin_vs_E18	CA1	0.0315287
3.06313e-05	0.181278	0.727493	Mat2a	Virgin_vs_E18	CA1	0.000760095
0.0118073	0.181188	1	Atxn2	Virgin_vs_E18	CA1	0.0765589
0.00379283	0.180655	1	Ap1s3	Virgin_vs_E18	CA1	0.0343693
0.00350754	0.1806	1	Sun1	Virgin_vs_E18	CA1	0.0325075
2.26694e-10	0.180599	5.38397e-06	Nkain3	Virgin_vs_E18	CA1	2.66637e-08
0.00357037	0.180498	1	Atp11a	Virgin_vs_E18	CA1	0.0328083
1.97144e-05	0.180479	0.468218	Dpp10	Virgin_vs_E18	CA1	0.000513011
0.00323535	0.180429	1	Hsf2	Virgin_vs_E18	CA1	0.0303947
0.010729	0.180366	1	2810403D21Rik	Virgin_vs_E18	CA1	0.0726094
0.00267115	0.179775	1	Grik3	Virgin_vs_E18	CA1	0.0263523
0.0069724	0.179687	1	Sp1	Virgin_vs_E18	CA1	0.0529777
0.00407624	0.179508	1	Hist1h2bc	Virgin_vs_E18	CA1	0.0359946
0.00351617	0.179357	1	Iscu	Virgin_vs_E18	CA1	0.0325075
0.00127305	0.179245	1	Mysm1	Virgin_vs_E18	CA1	0.0153105
0.000976149	0.179216	1	Rif1	Virgin_vs_E18	CA1	0.0125655
0.00460327	0.17919	1	Pkig	Virgin_vs_E18	CA1	0.0390084
0.0212252	0.17911	1	Fgfr1	Virgin_vs_E18	CA1	0.109847
0.00170448	0.179054	1	Rilpl2	Virgin_vs_E18	CA1	0.0189849
0.00120815	0.178996	1	Ybey	Virgin_vs_E18	CA1	0.0148643
0.019286	0.17898	1	5031439G07Rik	Virgin_vs_E18	CA1	0.103961
0.0115765	0.178924	1	Pwwp2a	Virgin_vs_E18	CA1	0.0757214
0.00428712	0.178725	1	Setd2	Virgin_vs_E18	CA1	0.0371371
0.00244171	0.178159	1	Nmd3	Virgin_vs_E18	CA1	0.0248437
0.152652	0.177465	1	Rasa2	Virgin_vs_E18	CA1	0.35781
0.00139404	0.176562	1	Gm17555	Virgin_vs_E18	CA1	0.0162989
0.000559083	0.17654	1	Chgb	Virgin_vs_E18	CA1	0.00803904
0.00378167	0.17604	1	Nfat5	Virgin_vs_E18	CA1	0.034321
0.00387728	0.175677	1	Gria4	Virgin_vs_E18	CA1	0.0348659
0.000561471	0.175453	1	Chka	Virgin_vs_E18	CA1	0.00804351
0.0541252	0.175111	1	Gtf2a2	Virgin_vs_E18	CA1	0.193974
0.0174921	0.174854	1	Appl1	Virgin_vs_E18	CA1	0.0974157
0.00624499	0.174625	1	1500011B03Rik	Virgin_vs_E18	CA1	0.0487739
0.00623678	0.17431	1	H2-T23	Virgin_vs_E18	CA1	0.0487739
0.00104278	0.174119	1	Galnt14	Virgin_vs_E18	CA1	0.0132741
0.0545052	0.174081	1	Lztfl1	Virgin_vs_E18	CA1	0.194742
0.00232445	0.173866	1	Zmym5	Virgin_vs_E18	CA1	0.0238988
0.00409997	0.173837	1	Pnrc2	Virgin_vs_E18	CA1	0.0360957
0.0261134	0.173451	1	A330017A19Rik	Virgin_vs_E18	CA1	0.124681
0.00347864	0.173293	1	Pxk	Virgin_vs_E18	CA1	0.0323701
0.005905	0.173011	1	Slc20a1	Virgin_vs_E18	CA1	0.0469288
0.00406639	0.172821	1	Naa16	Virgin_vs_E18	CA1	0.0359615
0.0203484	0.172778	1	Ep400	Virgin_vs_E18	CA1	0.10723
0.00207013	0.172768	1	Dync1i2	Virgin_vs_E18	CA1	0.0222161
0.00336303	0.172565	1	Rap1gap2	Virgin_vs_E18	CA1	0.0315261
0.00251839	0.17228	1	Tmed10	Virgin_vs_E18	CA1	0.0253173
0.00399983	0.172235	1	Anapc7	Virgin_vs_E18	CA1	0.035665
0.0122916	0.172156	1	Stk38	Virgin_vs_E18	CA1	0.0784602
0.00260693	0.17193	1	Tiam1	Virgin_vs_E18	CA1	0.0259997
0.00160401	0.171611	1	Slf1	Virgin_vs_E18	CA1	0.0181757
0.0119877	0.171529	1	Nr2f2	Virgin_vs_E18	CA1	0.0774398
0.216362	0.171248	1	Taf2	Virgin_vs_E18	CA1	0.438439
0.000836244	0.171088	1	Reep5	Virgin_vs_E18	CA1	0.0110021
0.00753079	0.171058	1	Chic2	Virgin_vs_E18	CA1	0.0558494
0.0172482	0.171006	1	Dicer1	Virgin_vs_E18	CA1	0.0966982
0.00182729	0.170994	1	Rgl2	Virgin_vs_E18	CA1	0.020049
8.32355e-06	0.170857	0.197684	Exosc2	Virgin_vs_E18	CA1	0.000247226
0.000153799	0.170751	1	Tmem72	Virgin_vs_E18	CA1	0.00290832
0.0152659	0.170543	1	Chpt1	Virgin_vs_E18	CA1	0.0902296
0.000832241	0.170459	1	Gng5	Virgin_vs_E18	CA1	0.010974
0.00569394	0.170451	1	Amn1	Virgin_vs_E18	CA1	0.0457115
0.0110859	0.170074	1	Paxbp1	Virgin_vs_E18	CA1	0.0739187
0.00235532	0.170022	1	Col4a1	Virgin_vs_E18	CA1	0.0240898
0.0135465	0.169982	1	Atxn7	Virgin_vs_E18	CA1	0.0839415
0.0582473	0.169847	1	Ryk	Virgin_vs_E18	CA1	0.202454
0.0247385	0.169836	1	Tbc1d9	Virgin_vs_E18	CA1	0.120536
0.0100109	0.169774	1	Setdb1	Virgin_vs_E18	CA1	0.0692678
0.0132562	0.169645	1	Syt5	Virgin_vs_E18	CA1	0.0824895
0.0111669	0.169432	1	Nae1	Virgin_vs_E18	CA1	0.0741228
0.0144002	0.169426	1	Ccz1	Virgin_vs_E18	CA1	0.0873066
0.00604648	0.168666	1	Slc26a4	Virgin_vs_E18	CA1	0.0477948
0.00348504	0.16862	1	AI838599	Virgin_vs_E18	CA1	0.0323783
0.00534159	0.16859	1	Lrrc16a	Virgin_vs_E18	CA1	0.0433295
0.0100013	0.168358	1	Rc3h2	Virgin_vs_E18	CA1	0.0692678
0.0318026	0.168243	1	Ier3ip1	Virgin_vs_E18	CA1	0.139112
0.00555761	0.16815	1	Pou2f1	Virgin_vs_E18	CA1	0.0448344
0.0939481	0.167943	1	Lrba	Virgin_vs_E18	CA1	0.271237
0.00163842	0.16772	1	Maoa	Virgin_vs_E18	CA1	0.0184422
0.018424	0.167415	1	Rbm6	Virgin_vs_E18	CA1	0.100616
0.00364069	0.166314	1	Mpc1	Virgin_vs_E18	CA1	0.0332984
0.0299391	0.166074	1	Pam	Virgin_vs_E18	CA1	0.13457
0.00731203	0.165988	1	Zmym4	Virgin_vs_E18	CA1	0.0545783
0.0242007	0.165932	1	Ccnt1	Virgin_vs_E18	CA1	0.119117
0.00375699	0.165901	1	5330434G04Rik	Virgin_vs_E18	CA1	0.0341707
0.0173912	0.165797	1	Syt13	Virgin_vs_E18	CA1	0.0973145
0.0208948	0.165545	1	Ctdspl	Virgin_vs_E18	CA1	0.108842
0.015894	0.165492	1	Meis2	Virgin_vs_E18	CA1	0.0926771
0.0197517	0.165469	1	Rsbn1	Virgin_vs_E18	CA1	0.105696
0.00132517	0.165422	1	Kdelr1	Virgin_vs_E18	CA1	0.0158724
0.0040086	0.16523	1	Trank1	Virgin_vs_E18	CA1	0.035665
0.0204299	0.164974	1	Tmod3	Virgin_vs_E18	CA1	0.107275
0.00144405	0.164853	1	Tmlhe	Virgin_vs_E18	CA1	0.0167174
0.0501611	0.164629	1	Amy1	Virgin_vs_E18	CA1	0.1853
0.000812871	0.16447	1	Ncbp3	Virgin_vs_E18	CA1	0.0107912
0.0112589	0.164031	1	Ccser2	Virgin_vs_E18	CA1	0.0745647
0.0203365	0.163824	1	Yipf6	Virgin_vs_E18	CA1	0.10723
0.0321693	0.16346	1	Actl6a	Virgin_vs_E18	CA1	0.139828
0.0348085	0.163156	1	Brinp3	Virgin_vs_E18	CA1	0.146745
0.036959	0.162985	1	Dusp14	Virgin_vs_E18	CA1	0.152036
0.0274157	0.162887	1	Kctd6	Virgin_vs_E18	CA1	0.128369
0.0106666	0.162871	1	Garnl3	Virgin_vs_E18	CA1	0.0725056
0.00587428	0.162728	1	Suclg2	Virgin_vs_E18	CA1	0.0467478
0.00755592	0.162647	1	Dync2h1	Virgin_vs_E18	CA1	0.0559652
0.0219062	0.162643	1	Sobp	Virgin_vs_E18	CA1	0.111329
0.0518267	0.162567	1	Maneal	Virgin_vs_E18	CA1	0.18897
0.0288474	0.162376	1	Terf1	Virgin_vs_E18	CA1	0.131717
0.0206887	0.162206	1	Lin9	Virgin_vs_E18	CA1	0.108225
0.0115872	0.162111	1	Ttc21b	Virgin_vs_E18	CA1	0.0757214
0.0119259	0.162036	1	P3h3	Virgin_vs_E18	CA1	0.0772424
0.0108731	0.162003	1	Dcaf12	Virgin_vs_E18	CA1	0.0730798
0.00413154	0.161786	1	4921523L03Rik	Virgin_vs_E18	CA1	0.036265
0.00723909	0.161751	1	Whsc1l1	Virgin_vs_E18	CA1	0.0543642
0.0100697	0.161703	1	Nucb1	Virgin_vs_E18	CA1	0.069425
0.0707589	0.161525	1	Epha3	Virgin_vs_E18	CA1	0.227147
0.0117282	0.161414	1	Ccnl1	Virgin_vs_E18	CA1	0.0762981
0.0281077	0.161328	1	Rspo2	Virgin_vs_E18	CA1	0.130467
7.0869e-07	0.16129	0.0168314	Xist	Virgin_vs_E18	CA1	3.04219e-05
0.0173773	0.161015	1	Rgs17	Virgin_vs_E18	CA1	0.0973145
0.010837	0.160898	1	Chd8	Virgin_vs_E18	CA1	0.0729895
0.0475994	0.160719	1	Necab1	Virgin_vs_E18	CA1	0.178985
0.0319656	0.160714	1	Tenm3	Virgin_vs_E18	CA1	0.139355
5.50755e-05	0.160534	1	Itm2c	Virgin_vs_E18	CA1	0.00124576
0.000627959	0.160377	1	Scd2	Virgin_vs_E18	CA1	0.00870997
0.00613207	0.160324	1	Rnmt	Virgin_vs_E18	CA1	0.0482767
0.0246034	0.16013	1	Sgpp1	Virgin_vs_E18	CA1	0.120266
0.00449185	0.160121	1	Mcmbp	Virgin_vs_E18	CA1	0.0383404
0.01238	0.159999	1	Usp48	Virgin_vs_E18	CA1	0.0787099
0.0869882	0.159882	1	Cdh2	Virgin_vs_E18	CA1	0.259684
0.0231704	0.159808	1	Dapk1	Virgin_vs_E18	CA1	0.115381
0.0311589	0.159616	1	Tagln3	Virgin_vs_E18	CA1	0.138233
0.0124537	0.159565	1	A330044P14Rik	Virgin_vs_E18	CA1	0.0788374
0.136638	0.159502	1	Cspp1	Virgin_vs_E18	CA1	0.337633
0.0272281	0.159492	1	Grik2	Virgin_vs_E18	CA1	0.127694
0.00569742	0.159366	1	Lrpap1	Virgin_vs_E18	CA1	0.0457115
0.0166039	0.159129	1	Lpin2	Virgin_vs_E18	CA1	0.0948958
0.00070108	0.158881	1	Gm13056	Virgin_vs_E18	CA1	0.00956624
0.000194744	0.158835	1	Etnk1	Virgin_vs_E18	CA1	0.00347057
0.0100814	0.158812	1	Rep15	Virgin_vs_E18	CA1	0.069425
0.0180104	0.15868	1	Tmtc1	Virgin_vs_E18	CA1	0.0991755
0.00474327	0.158677	1	Sdccag8	Virgin_vs_E18	CA1	0.0396802
0.00889631	0.158362	1	Hyal3	Virgin_vs_E18	CA1	0.0629683
0.0179569	0.158108	1	Pphln1	Virgin_vs_E18	CA1	0.0989733
0.013263	0.157984	1	Hacd1	Virgin_vs_E18	CA1	0.0824895
0.00262785	0.157921	1	Ranbp3	Virgin_vs_E18	CA1	0.0261495
0.015948	0.157893	1	C730034F03Rik	Virgin_vs_E18	CA1	0.0927696
0.000962189	0.157819	1	Med23	Virgin_vs_E18	CA1	0.0124639
0.0912219	0.157755	1	Nudt4	Virgin_vs_E18	CA1	0.266638
0.00287037	0.157712	1	Uchl5	Virgin_vs_E18	CA1	0.0275827
0.000798282	0.157377	1	Socs2	Virgin_vs_E18	CA1	0.0106747
0.000142482	0.157346	1	0610031O16Rik	Virgin_vs_E18	CA1	0.00273836
0.0199304	0.157343	1	Ncoa2	Virgin_vs_E18	CA1	0.106289
0.000369925	0.15687	1	Strbp	Virgin_vs_E18	CA1	0.00580141
0.00522934	0.156344	1	Fbxl5	Virgin_vs_E18	CA1	0.0427136
0.00400558	0.156239	1	Ahcyl2	Virgin_vs_E18	CA1	0.035665
0.00803536	0.156233	1	9330159F19Rik	Virgin_vs_E18	CA1	0.058703
0.00176452	0.156027	1	Trpv2	Virgin_vs_E18	CA1	0.0195059
0.0292159	0.155872	1	Sik2	Virgin_vs_E18	CA1	0.132576
0.0291907	0.15576	1	Slc38a10	Virgin_vs_E18	CA1	0.132564
0.00659092	0.155459	1	2810403A07Rik	Virgin_vs_E18	CA1	0.0506021
0.056779	0.155389	1	Rreb1	Virgin_vs_E18	CA1	0.199473
0.013212	0.155337	1	Ormdl3	Virgin_vs_E18	CA1	0.0823966
0.0285194	0.15526	1	Mecp2	Virgin_vs_E18	CA1	0.131238
0.0138336	0.154617	1	BC005561	Virgin_vs_E18	CA1	0.0852779
0.00745084	0.15445	1	Cox19	Virgin_vs_E18	CA1	0.0553962
0.0362948	0.15338	1	Mapkbp1	Virgin_vs_E18	CA1	0.150619
0.006529	0.153215	1	Zdhhc17	Virgin_vs_E18	CA1	0.050456
0.0141572	0.152915	1	Snrpb	Virgin_vs_E18	CA1	0.0866158
0.0687586	0.152857	1	Abcg1	Virgin_vs_E18	CA1	0.223285
0.0379276	0.152569	1	Gm5464	Virgin_vs_E18	CA1	0.154179
0.0113491	0.152435	1	Ctsl	Virgin_vs_E18	CA1	0.0748249
0.0123535	0.152288	1	Otub2	Virgin_vs_E18	CA1	0.0786268
0.0926003	0.152266	1	Npy1r	Virgin_vs_E18	CA1	0.269329
0.037959	0.15219	1	Ndel1	Virgin_vs_E18	CA1	0.154179
0.014702	0.152091	1	Dtnbos	Virgin_vs_E18	CA1	0.0885885
0.00400763	0.152042	1	Gtf2i	Virgin_vs_E18	CA1	0.035665
0.040508	0.151997	1	Ciapin1	Virgin_vs_E18	CA1	0.160747
0.066783	0.151963	1	Esco1	Virgin_vs_E18	CA1	0.218925
0.0309819	0.151575	1	Ypel2	Virgin_vs_E18	CA1	0.137721
0.0215835	0.151525	1	Runx1t1	Virgin_vs_E18	CA1	0.110622
0.0159006	0.151448	1	Safb2	Virgin_vs_E18	CA1	0.0926771
0.0599126	0.151072	1	Sec22b	Virgin_vs_E18	CA1	0.205644
0.0987026	0.150917	1	Proser1	Virgin_vs_E18	CA1	0.280958
0.00436498	0.150792	1	Fcho2	Virgin_vs_E18	CA1	0.0376731
0.0587553	0.150737	1	Hs2st1	Virgin_vs_E18	CA1	0.203143
0.0221679	0.150691	1	Mxd4	Virgin_vs_E18	CA1	0.112001
0.0284063	0.150579	1	Igsf21	Virgin_vs_E18	CA1	0.131146
0.179765	0.150554	1	Smg7	Virgin_vs_E18	CA1	0.391844
0.0283756	0.150479	1	Magi1	Virgin_vs_E18	CA1	0.131146
0.00913826	0.149699	1	Slc4a3	Virgin_vs_E18	CA1	0.0642848
0.113898	0.149546	1	Tmeff2	Virgin_vs_E18	CA1	0.303964
0.0120644	0.149386	1	Cacng2	Virgin_vs_E18	CA1	0.0775583
0.0320684	0.149326	1	Cadm4	Virgin_vs_E18	CA1	0.139571
9.54847e-06	0.149094	0.226776	Rian	Virgin_vs_E18	CA1	0.000279376
0.0144657	0.149063	1	Ttyh1	Virgin_vs_E18	CA1	0.0875236
0.0367556	0.148974	1	Crtac1	Virgin_vs_E18	CA1	0.151797
0.0374824	0.148938	1	N4bp2l2	Virgin_vs_E18	CA1	0.15327
0.037374	0.148879	1	Zdbf2	Virgin_vs_E18	CA1	0.152955
0.0259056	0.148813	1	Pcsk1n	Virgin_vs_E18	CA1	0.124267
0.0123007	0.148553	1	Pdgfrl	Virgin_vs_E18	CA1	0.0784602
0.0153342	0.148521	1	Cnot6	Virgin_vs_E18	CA1	0.0903613
1.15133e-12	0.148483	2.73441e-08	Meg3	Virgin_vs_E18	CA1	1.78184e-10
0.186262	0.148475	1	Mga	Virgin_vs_E18	CA1	0.401276
0.0142156	0.148328	1	Scfd2	Virgin_vs_E18	CA1	0.0866343
0.11821	0.148121	1	Uggt2	Virgin_vs_E18	CA1	0.309654
0.00997652	0.148107	1	Lrrc2	Virgin_vs_E18	CA1	0.0692678
0.0799676	0.148003	1	Cdkal1	Virgin_vs_E18	CA1	0.245969
0.0387605	0.147883	1	Hpcal4	Virgin_vs_E18	CA1	0.156444
0.0212937	0.147699	1	Usp16	Virgin_vs_E18	CA1	0.109946
0.0250619	0.147676	1	Kcnc1	Virgin_vs_E18	CA1	0.121508
0.0120961	0.147605	1	Syt7	Virgin_vs_E18	CA1	0.0775761
0.0537279	0.14757	1	Clpx	Virgin_vs_E18	CA1	0.193493
0.00800863	0.147319	1	D3Ertd254e	Virgin_vs_E18	CA1	0.0585805
0.0150687	0.147215	1	Unkl	Virgin_vs_E18	CA1	0.0893337
0.0657352	0.146907	1	Tpp1	Virgin_vs_E18	CA1	0.217007
0.0299391	0.146555	1	Tmem57	Virgin_vs_E18	CA1	0.13457
0.00612032	0.146532	1	Pick1	Virgin_vs_E18	CA1	0.0482488
0.0210946	0.146515	1	Kdm5b	Virgin_vs_E18	CA1	0.109553
0.0124339	0.146479	1	Lpin1	Virgin_vs_E18	CA1	0.0788374
0.0165127	0.146439	1	Dynlt1c	Virgin_vs_E18	CA1	0.0945708
8.79071e-05	0.146336	1	Unc80	Virgin_vs_E18	CA1	0.00183979
0.00850415	0.146191	1	Echs1	Virgin_vs_E18	CA1	0.060917
0.0733016	0.14599	1	Btaf1	Virgin_vs_E18	CA1	0.232428
0.0357347	0.145981	1	Mfsd11	Virgin_vs_E18	CA1	0.149068
0.0336651	0.145869	1	Trim9	Virgin_vs_E18	CA1	0.143467
0.0372766	0.145466	1	Snx2	Virgin_vs_E18	CA1	0.152769
0.0133864	0.145437	1	Dlgap5	Virgin_vs_E18	CA1	0.0831317
0.0343223	0.145384	1	Igf1r	Virgin_vs_E18	CA1	0.145425
0.0327323	0.145297	1	Gm21833	Virgin_vs_E18	CA1	0.141128
0.0684042	0.145283	1	Abhd2	Virgin_vs_E18	CA1	0.222503
0.0317907	0.145223	1	Pcdh7	Virgin_vs_E18	CA1	0.139112
0.00710489	0.14522	1	Ccbl2	Virgin_vs_E18	CA1	0.0536364
0.00720146	0.145217	1	Jmjd1c	Virgin_vs_E18	CA1	0.0541583
0.0120802	0.145214	1	Eef2	Virgin_vs_E18	CA1	0.0775583
0.0202464	0.145174	1	Kcna2	Virgin_vs_E18	CA1	0.107061
0.012611	0.145103	1	Armc8	Virgin_vs_E18	CA1	0.0795766
0.0386609	0.145082	1	Gm6483	Virgin_vs_E18	CA1	0.156157
0.0327976	0.14497	1	Tpd52l2	Virgin_vs_E18	CA1	0.141306
0.0587409	0.144933	1	Map4k5	Virgin_vs_E18	CA1	0.203143
0.0214299	0.144834	1	Hnrnpul1	Virgin_vs_E18	CA1	0.110436
0.0153533	0.144769	1	Fam92a	Virgin_vs_E18	CA1	0.0903831
0.0220536	0.144761	1	Sfswap	Virgin_vs_E18	CA1	0.111682
0.00216686	0.14454	1	Luc7l2	Virgin_vs_E18	CA1	0.0227865
0.000475825	0.144431	1	Maats1	Virgin_vs_E18	CA1	0.00715684
0.0246131	0.144417	1	Mfsd8	Virgin_vs_E18	CA1	0.120266
0.0198041	0.144365	1	Papola	Virgin_vs_E18	CA1	0.10588
0.0135597	0.144353	1	2500004C02Rik	Virgin_vs_E18	CA1	0.0839415
0.0152555	0.144276	1	Uhrf1bp1l	Virgin_vs_E18	CA1	0.0902296
0.0263027	0.143936	1	Atp1b2	Virgin_vs_E18	CA1	0.124948
0.0388382	0.143823	1	Homer1	Virgin_vs_E18	CA1	0.156444
0.0229221	0.143709	1	Cdc42	Virgin_vs_E18	CA1	0.11463
0.0225831	0.143571	1	Nab1	Virgin_vs_E18	CA1	0.113514
0.0450277	0.143545	1	Bhlhb9	Virgin_vs_E18	CA1	0.173364
0.0702205	0.143522	1	Deptor	Virgin_vs_E18	CA1	0.226531
0.00649816	0.143451	1	Hook1	Virgin_vs_E18	CA1	0.0503399
0.0536829	0.143447	1	Nmt2	Virgin_vs_E18	CA1	0.193449
0.0145808	0.143128	1	Bsg	Virgin_vs_E18	CA1	0.0881292
0.0299181	0.143018	1	H13	Virgin_vs_E18	CA1	0.13457
0.394678	0.143013	1	Smc6	Virgin_vs_E18	CA1	0.604619
0.0170493	0.142858	1	Taf1	Virgin_vs_E18	CA1	0.0961331
0.0432836	0.142808	1	Upf3b	Virgin_vs_E18	CA1	0.169362
0.00482018	0.142781	1	Igsf8	Virgin_vs_E18	CA1	0.0401522
0.0298983	0.142721	1	Brwd1	Virgin_vs_E18	CA1	0.13457
0.0206691	0.142603	1	Fbxl20	Virgin_vs_E18	CA1	0.108225
0.00281818	0.14239	1	Tmem108	Virgin_vs_E18	CA1	0.0273494
0.0175623	0.142207	1	D10Jhu81e	Virgin_vs_E18	CA1	0.0976216
0.00415266	0.142181	1	Pcnp	Virgin_vs_E18	CA1	0.036342
0.0216304	0.142176	1	Exph5	Virgin_vs_E18	CA1	0.110622
0.0467822	0.142136	1	Aida	Virgin_vs_E18	CA1	0.177158
0.0373086	0.142093	1	Socs6	Virgin_vs_E18	CA1	0.152794
0.0350798	0.142061	1	Ppargc1b	Virgin_vs_E18	CA1	0.14741
0.000148014	0.142021	1	Pnisr	Virgin_vs_E18	CA1	0.00282619
0.0891365	0.141989	1	Ccdc93	Virgin_vs_E18	CA1	0.26351
0.000687853	0.141946	1	Tspan15	Virgin_vs_E18	CA1	0.00945155
0.0596161	0.141708	1	Mtfr1l	Virgin_vs_E18	CA1	0.204911
0.00317262	0.141288	1	Slc45a4	Virgin_vs_E18	CA1	0.029997
0.0867053	0.140859	1	N4bp2l1	Virgin_vs_E18	CA1	0.259366
0.00106135	0.140849	1	Tmem59	Virgin_vs_E18	CA1	0.0134232
0.0140261	0.140394	1	Pan3	Virgin_vs_E18	CA1	0.0860141
0.0475386	0.140309	1	Pttg1	Virgin_vs_E18	CA1	0.178952
0.0262463	0.140279	1	Prkacb	Virgin_vs_E18	CA1	0.124875
0.000227239	0.139937	1	Adra1a	Virgin_vs_E18	CA1	0.00387359
0.0226588	0.13992	1	Adam28	Virgin_vs_E18	CA1	0.113778
0.0821004	0.139759	1	9330182L06Rik	Virgin_vs_E18	CA1	0.250302
0.114903	0.139615	1	Rictor	Virgin_vs_E18	CA1	0.304874
0.207556	0.13957	1	Tvp23b	Virgin_vs_E18	CA1	0.427694
0.164597	0.139516	1	Rcbtb1	Virgin_vs_E18	CA1	0.375482
0.0973981	0.139398	1	Dpm2	Virgin_vs_E18	CA1	0.277922
0.00572719	0.13927	1	Tshz2	Virgin_vs_E18	CA1	0.0458877
0.0603134	0.139237	1	Slc33a1	Virgin_vs_E18	CA1	0.206336
0.0120637	0.139184	1	Far1	Virgin_vs_E18	CA1	0.0775583
0.0640238	0.139131	1	Tgoln1	Virgin_vs_E18	CA1	0.213908
0.115345	0.138978	1	Fn1	Virgin_vs_E18	CA1	0.304874
0.005425	0.138971	1	Ctsb	Virgin_vs_E18	CA1	0.0438247
0.0362537	0.138887	1	Ntrk2	Virgin_vs_E18	CA1	0.150571
0.031242	0.138854	1	Znrf1	Virgin_vs_E18	CA1	0.138233
0.0156899	0.138808	1	Saraf	Virgin_vs_E18	CA1	0.0917219
0.0651635	0.138763	1	Tmco1	Virgin_vs_E18	CA1	0.216146
0.0368127	0.138706	1	Ccdc25	Virgin_vs_E18	CA1	0.151927
0.1035	0.138664	1	Stxbp6	Virgin_vs_E18	CA1	0.28834
0.035674	0.138607	1	Ppp1r15b	Virgin_vs_E18	CA1	0.149068
0.0107523	0.138553	1	Tulp3	Virgin_vs_E18	CA1	0.0726832
0.110067	0.138523	1	Micu1	Virgin_vs_E18	CA1	0.29854
0.232616	0.138457	1	Golga4	Virgin_vs_E18	CA1	0.452986
0.0155674	0.138326	1	Usp14	Virgin_vs_E18	CA1	0.0911872
0.0309298	0.138324	1	Yme1l1	Virgin_vs_E18	CA1	0.137593
0.0187041	0.138299	1	Glt8d2	Virgin_vs_E18	CA1	0.101475
0.0261279	0.138291	1	Pias2	Virgin_vs_E18	CA1	0.124681
0.0285416	0.138199	1	Acsl6	Virgin_vs_E18	CA1	0.131238
0.0156429	0.138063	1	Dcaf13	Virgin_vs_E18	CA1	0.0915382
0.00732574	0.138014	1	Hspa12b	Virgin_vs_E18	CA1	0.0546041
0.00575506	0.138001	1	Tecr	Virgin_vs_E18	CA1	0.0460483
0.110463	0.137701	1	Smek1	Virgin_vs_E18	CA1	0.298544
0.00380909	0.137631	1	Gm43740	Virgin_vs_E18	CA1	0.0344105
0.0635313	0.137391	1	Qrich1	Virgin_vs_E18	CA1	0.212736
0.0143404	0.13715	1	Tsen2	Virgin_vs_E18	CA1	0.0871241
0.0222619	0.13702	1	Csf3r	Virgin_vs_E18	CA1	0.112187
0.00656539	0.136958	1	Coq9	Virgin_vs_E18	CA1	0.0505419
0.0271587	0.136802	1	Idh1	Virgin_vs_E18	CA1	0.127632
0.0924498	0.136785	1	Lgmn	Virgin_vs_E18	CA1	0.269157
0.17087	0.136675	1	Zfyve16	Virgin_vs_E18	CA1	0.382086
0.103746	0.136653	1	Ssr3	Virgin_vs_E18	CA1	0.288752
0.146111	0.136547	1	Arhgap23	Virgin_vs_E18	CA1	0.350441
0.0515581	0.136424	1	Hrk	Virgin_vs_E18	CA1	0.188683
0.0437867	0.135838	1	Fam213a	Virgin_vs_E18	CA1	0.17031
0.0175329	0.13579	1	D430042O09Rik	Virgin_vs_E18	CA1	0.0975505
0.00647188	0.135751	1	Iffo1	Virgin_vs_E18	CA1	0.0502126
0.0150345	0.135679	1	Zfp950	Virgin_vs_E18	CA1	0.0893337
0.135216	0.135662	1	Ddx50	Virgin_vs_E18	CA1	0.335671
0.00233778	0.135658	1	Atp2b2	Virgin_vs_E18	CA1	0.0239521
0.049076	0.135607	1	Cystm1	Virgin_vs_E18	CA1	0.182406
0.0263635	0.135457	1	Xpo1	Virgin_vs_E18	CA1	0.125136
0.0284488	0.135356	1	Rnpep	Virgin_vs_E18	CA1	0.131146
0.0644553	0.135344	1	Lrrk2	Virgin_vs_E18	CA1	0.214666
0.000177655	0.135281	1	Ghdc	Virgin_vs_E18	CA1	0.00324469
0.0107966	0.135081	1	Glg1	Virgin_vs_E18	CA1	0.0728984
0.048583	0.135053	1	A730020E08Rik	Virgin_vs_E18	CA1	0.181912
0.0314955	0.134994	1	Nek7	Virgin_vs_E18	CA1	0.138745
0.0247376	0.134905	1	Hsd17b12	Virgin_vs_E18	CA1	0.120536
0.0285254	0.13488	1	Abhd6	Virgin_vs_E18	CA1	0.131238
0.0288742	0.134849	1	Rpia	Virgin_vs_E18	CA1	0.131737
0.0455874	0.134752	1	Galnt11	Virgin_vs_E18	CA1	0.174317
0.013142	0.134616	1	Pecam1	Virgin_vs_E18	CA1	0.0822214
0.00213662	0.134548	1	Sel1l	Virgin_vs_E18	CA1	0.0226754
0.0109969	0.134376	1	Fbxo41	Virgin_vs_E18	CA1	0.0735788
0.0336404	0.13434	1	Mrpl13	Virgin_vs_E18	CA1	0.143466
0.0213562	0.134257	1	Ints2	Virgin_vs_E18	CA1	0.110172
0.0774753	0.134224	1	Cbl	Virgin_vs_E18	CA1	0.241255
0.155199	0.134099	1	Arl6	Virgin_vs_E18	CA1	0.361466
0.0645811	0.133752	1	Khdrbs2	Virgin_vs_E18	CA1	0.214932
0.0223844	0.13347	1	Camkk1	Virgin_vs_E18	CA1	0.112611
0.0100233	0.133346	1	St3gal5	Virgin_vs_E18	CA1	0.0692678
0.00453441	0.133264	1	Dagla	Virgin_vs_E18	CA1	0.0385917
0.0561248	0.133229	1	Aldh1a3	Virgin_vs_E18	CA1	0.198481
0.056254	0.133205	1	Zfp160	Virgin_vs_E18	CA1	0.198481
0.0309085	0.133114	1	L1cam	Virgin_vs_E18	CA1	0.137593
0.106582	0.133046	1	Mfap3	Virgin_vs_E18	CA1	0.293057
0.115091	0.133	1	Apba1	Virgin_vs_E18	CA1	0.304874
0.320304	0.132764	1	Creb1	Virgin_vs_E18	CA1	0.544979
0.0487491	0.132636	1	Ube3c	Virgin_vs_E18	CA1	0.181912
0.00488659	0.13262	1	Hnrnpa2b1	Virgin_vs_E18	CA1	0.0405595
0.167594	0.132507	1	Usp1	Virgin_vs_E18	CA1	0.37923
0.0230751	0.132476	1	Lynx1	Virgin_vs_E18	CA1	0.115101
0.00857843	0.132463	1	Crocc	Virgin_vs_E18	CA1	0.0613744
0.00402687	0.132394	1	App	Virgin_vs_E18	CA1	0.0357195
0.0527767	0.13212	1	Gpr26	Virgin_vs_E18	CA1	0.191003
0.0296392	0.132002	1	Rnpc3	Virgin_vs_E18	CA1	0.13398
0.0577787	0.13196	1	Epc1	Virgin_vs_E18	CA1	0.20166
0.0285794	0.131904	1	Psmc2	Virgin_vs_E18	CA1	0.131304
0.0504712	0.131761	1	Eif4ebp1	Virgin_vs_E18	CA1	0.186095
0.0727759	0.131697	1	Lhx2	Virgin_vs_E18	CA1	0.231699
0.037503	0.131656	1	Msmo1	Virgin_vs_E18	CA1	0.15327
0.052199	0.131577	1	Xylt1	Virgin_vs_E18	CA1	0.189847
0.03264	0.131559	1	Tmbim6	Virgin_vs_E18	CA1	0.140937
0.0450399	0.131534	1	Abhd5	Virgin_vs_E18	CA1	0.173364
0.0149539	0.131498	1	Spc24	Virgin_vs_E18	CA1	0.0893337
0.0388176	0.131465	1	Suv420h1	Virgin_vs_E18	CA1	0.156444
0.0103268	0.131425	1	Hsp90aa1	Virgin_vs_E18	CA1	0.0707005
0.046545	0.131375	1	Cux1	Virgin_vs_E18	CA1	0.176795
0.0108278	0.130833	1	Pink1	Virgin_vs_E18	CA1	0.0729895
0.148065	0.13064	1	Cox17	Virgin_vs_E18	CA1	0.352254
0.0251865	0.130527	1	Serpine2	Virgin_vs_E18	CA1	0.121911
0.0765799	0.13052	1	4933434E20Rik	Virgin_vs_E18	CA1	0.239429
0.0377663	0.130501	1	Pigq	Virgin_vs_E18	CA1	0.153811
0.0131759	0.130369	1	Rnft1	Virgin_vs_E18	CA1	0.0823461
0.0228582	0.130327	1	Paip2b	Virgin_vs_E18	CA1	0.114505
0.114579	0.130301	1	Gm26853	Virgin_vs_E18	CA1	0.304754
0.129669	0.130152	1	Cldnd1	Virgin_vs_E18	CA1	0.327692
0.00562367	0.13008	1	Ankfy1	Virgin_vs_E18	CA1	0.0452433
0.640042	0.130075	1	Bpgm	Virgin_vs_E18	CA1	0.785385
0.026153	0.130064	1	Gdap1	Virgin_vs_E18	CA1	0.124681
0.00213596	0.129892	1	Svop	Virgin_vs_E18	CA1	0.0226754
0.034489	0.129881	1	Cep162	Virgin_vs_E18	CA1	0.145711
0.170775	0.129515	1	Zmiz1	Virgin_vs_E18	CA1	0.382019
0.021914	0.129505	1	Lrfn5	Virgin_vs_E18	CA1	0.111329
0.0490985	0.129389	1	Dbt	Virgin_vs_E18	CA1	0.182406
0.0444642	0.129295	1	Gm15446	Virgin_vs_E18	CA1	0.172036
0.050701	0.129158	1	Cenpc1	Virgin_vs_E18	CA1	0.186463
0.0552974	0.129109	1	Manf	Virgin_vs_E18	CA1	0.196617
0.0835643	0.129033	1	Fbxw2	Virgin_vs_E18	CA1	0.252929
0.0320863	0.128957	1	Odf2l	Virgin_vs_E18	CA1	0.139571
0.0153279	0.128932	1	Hmbox1	Virgin_vs_E18	CA1	0.0903613
0.085527	0.128908	1	Pcnx	Virgin_vs_E18	CA1	0.256887
0.031549	0.128802	1	Ide	Virgin_vs_E18	CA1	0.138877
0.0534823	0.128683	1	Zfp398	Virgin_vs_E18	CA1	0.192963
0.00476752	0.128669	1	Grk4	Virgin_vs_E18	CA1	0.0397699
0.0695456	0.12866	1	Tmco3	Virgin_vs_E18	CA1	0.225002
0.00597083	0.128637	1	Specc1	Virgin_vs_E18	CA1	0.0473879
0.0546158	0.128467	1	Vezt	Virgin_vs_E18	CA1	0.1949
0.0884214	0.128392	1	Srsf6	Virgin_vs_E18	CA1	0.262232
0.00839913	0.128291	1	Raph1	Virgin_vs_E18	CA1	0.0603855
0.118559	0.128262	1	Brd4	Virgin_vs_E18	CA1	0.30989
0.0524223	0.128231	1	Elf2	Virgin_vs_E18	CA1	0.190222
0.0864308	0.128223	1	Uqcrb	Virgin_vs_E18	CA1	0.258808
0.0632221	0.128033	1	Abl2	Virgin_vs_E18	CA1	0.21222
0.0217592	0.12768	1	Gtf2b	Virgin_vs_E18	CA1	0.111082
0.00116599	0.127664	1	Adarb1	Virgin_vs_E18	CA1	0.0144059
0.0128503	0.127653	1	Ccdc53	Virgin_vs_E18	CA1	0.0807399
0.102392	0.127541	1	Tmx3	Virgin_vs_E18	CA1	0.286709
0.0363165	0.127359	1	Zkscan1	Virgin_vs_E18	CA1	0.150619
0.0544111	0.127305	1	Plat	Virgin_vs_E18	CA1	0.194524
0.178927	0.127157	1	Slc25a20	Virgin_vs_E18	CA1	0.391364
0.110195	0.127061	1	Asah1	Virgin_vs_E18	CA1	0.29854
0.0573679	0.127055	1	Mrps10	Virgin_vs_E18	CA1	0.200583
0.0829247	0.12705	1	Lasp1	Virgin_vs_E18	CA1	0.251826
0.00694796	0.126947	1	Gm2694	Virgin_vs_E18	CA1	0.0528602
0.0242041	0.12693	1	Psma3	Virgin_vs_E18	CA1	0.119117
0.101472	0.126849	1	Mafg	Virgin_vs_E18	CA1	0.285446
0.0218982	0.126772	1	Cdkl3	Virgin_vs_E18	CA1	0.111329
0.00796681	0.12657	1	Ptprn	Virgin_vs_E18	CA1	0.0583472
0.233159	0.126463	1	Efr3b	Virgin_vs_E18	CA1	0.453893
0.00525905	0.126265	1	Noct	Virgin_vs_E18	CA1	0.0428825
0.0351066	0.126145	1	Arid5a	Virgin_vs_E18	CA1	0.14741
0.0287437	0.126108	1	Cep63	Virgin_vs_E18	CA1	0.131652
0.108498	0.126094	1	Alkbh8	Virgin_vs_E18	CA1	0.296799
0.0671994	0.126074	1	Tmem47	Virgin_vs_E18	CA1	0.220005
0.0710589	0.126061	1	Slirp	Virgin_vs_E18	CA1	0.227861
0.0384353	0.125765	1	Colec12	Virgin_vs_E18	CA1	0.155781
0.0226939	0.125754	1	Fbxo32	Virgin_vs_E18	CA1	0.113779
0.0182713	0.125639	1	Abcd4	Virgin_vs_E18	CA1	0.100143
0.390189	0.125545	1	Tada2b	Virgin_vs_E18	CA1	0.600865
0.0436406	0.125469	1	Hopx	Virgin_vs_E18	CA1	0.170099
0.217599	0.125416	1	Mmp16	Virgin_vs_E18	CA1	0.439609
0.071332	0.125222	1	Nol3	Virgin_vs_E18	CA1	0.228363
0.0535804	0.125163	1	Pcdh10	Virgin_vs_E18	CA1	0.193198
0.0449011	0.125092	1	Clasp1	Virgin_vs_E18	CA1	0.17327
0.0259762	0.125086	1	Zkscan3	Virgin_vs_E18	CA1	0.124504
0.0471795	0.12503	1	Zdhhc20	Virgin_vs_E18	CA1	0.178203
0.166027	0.125024	1	Tram1l1	Virgin_vs_E18	CA1	0.377035
0.0357652	0.125021	1	Osgin2	Virgin_vs_E18	CA1	0.149068
0.0356478	0.124984	1	Nbeal1	Virgin_vs_E18	CA1	0.149068
0.0279208	0.124984	1	2300009A05Rik	Virgin_vs_E18	CA1	0.129804
0.132804	0.124949	1	Zfp397	Virgin_vs_E18	CA1	0.331926
0.0778657	0.124754	1	Gm17066	Virgin_vs_E18	CA1	0.241906
0.0827956	0.124729	1	D1Ertd622e	Virgin_vs_E18	CA1	0.251798
0.0212077	0.124722	1	Grik4	Virgin_vs_E18	CA1	0.109847
0.0150207	0.124644	1	Scyl2	Virgin_vs_E18	CA1	0.0893337
0.0429737	0.1246	1	Scin	Virgin_vs_E18	CA1	0.168261
0.0185219	0.124177	1	Ptpn5	Virgin_vs_E18	CA1	0.100858
0.0109376	0.124079	1	Tnk2	Virgin_vs_E18	CA1	0.0734295
0.227603	0.124046	1	Cnep1r1	Virgin_vs_E18	CA1	0.44872
0.0401655	0.123881	1	Dcx	Virgin_vs_E18	CA1	0.159789
0.0938758	0.12358	1	Cul2	Virgin_vs_E18	CA1	0.271237
0.0846768	0.12347	1	Adat1	Virgin_vs_E18	CA1	0.255639
0.0465882	0.123398	1	Ankrd16	Virgin_vs_E18	CA1	0.176795
0.118598	0.123358	1	Srek1	Virgin_vs_E18	CA1	0.30989
0.00457411	0.123138	1	Nol12	Virgin_vs_E18	CA1	0.0388172
0.0591703	0.123026	1	Ypel3	Virgin_vs_E18	CA1	0.203974
0.0440577	0.122974	1	Ubxn4	Virgin_vs_E18	CA1	0.170912
0.0937939	0.122796	1	Cmpk1	Virgin_vs_E18	CA1	0.271237
0.0580774	0.122562	1	Ranbp9	Virgin_vs_E18	CA1	0.202094
0.0127439	0.122471	1	Hnrnph1	Virgin_vs_E18	CA1	0.080243
0.0372075	0.122411	1	Trim11	Virgin_vs_E18	CA1	0.152592
0.0352848	0.122406	1	Nmrk1	Virgin_vs_E18	CA1	0.147921
0.0033889	0.122275	1	Pds5a	Virgin_vs_E18	CA1	0.0316351
0.0572228	0.12225	1	Scaf8	Virgin_vs_E18	CA1	0.200314
0.155878	0.122061	1	Ccnd2	Virgin_vs_E18	CA1	0.362339
0.113999	0.122056	1	Rab11b	Virgin_vs_E18	CA1	0.30405
0.0589173	0.121898	1	Ncald	Virgin_vs_E18	CA1	0.20346
0.0214449	0.121578	1	Zranb2	Virgin_vs_E18	CA1	0.110436
0.0780245	0.12156	1	Rspry1	Virgin_vs_E18	CA1	0.242271
0.00154396	0.121351	1	Bckdk	Virgin_vs_E18	CA1	0.0176311
0.0207027	0.121292	1	Atpaf2	Virgin_vs_E18	CA1	0.108225
0.0898791	0.120986	1	Zmym6	Virgin_vs_E18	CA1	0.264554
0.280067	0.120971	1	Golim4	Virgin_vs_E18	CA1	0.505547
0.0619264	0.120735	1	Katnbl1	Virgin_vs_E18	CA1	0.209907
0.0737275	0.12071	1	Cep295	Virgin_vs_E18	CA1	0.233239
0.0731549	0.120696	1	Cyb561	Virgin_vs_E18	CA1	0.232177
0.0357331	0.120363	1	Emc4	Virgin_vs_E18	CA1	0.149068
0.0407633	0.120272	1	Usp4	Virgin_vs_E18	CA1	0.161472
0.243121	0.120215	1	Ephx4	Virgin_vs_E18	CA1	0.464269
0.0290589	0.120204	1	Ndrg2	Virgin_vs_E18	CA1	0.132272
0.100026	0.120028	1	Runx2	Virgin_vs_E18	CA1	0.283423
0.11526	0.119984	1	Fam63b	Virgin_vs_E18	CA1	0.304874
0.0252212	0.119901	1	Cd99l2	Virgin_vs_E18	CA1	0.121952
0.073513	0.119895	1	Tmem132a	Virgin_vs_E18	CA1	0.232686
0.00706964	0.119762	1	Nvl	Virgin_vs_E18	CA1	0.0534525
0.16892	0.119578	1	Alcam	Virgin_vs_E18	CA1	0.380606
0.0477003	0.119409	1	Krr1	Virgin_vs_E18	CA1	0.179216
0.0389177	0.119407	1	Nptx1	Virgin_vs_E18	CA1	0.156656
0.00536873	0.11919	1	Hspa4l	Virgin_vs_E18	CA1	0.0434897
0.212213	0.118845	1	Unc13d	Virgin_vs_E18	CA1	0.433041
0.120682	0.118829	1	Ralgps1	Virgin_vs_E18	CA1	0.313243
0.0270743	0.118777	1	Tyro3	Virgin_vs_E18	CA1	0.127481
0.0396805	0.118776	1	Cisd1	Virgin_vs_E18	CA1	0.158749
0.0215605	0.118738	1	Fam81a	Virgin_vs_E18	CA1	0.110622
0.0287801	0.118734	1	Lman2l	Virgin_vs_E18	CA1	0.131692
0.0623323	0.118632	1	Pdlim7	Virgin_vs_E18	CA1	0.210676
0.0968231	0.118598	1	Lmtk2	Virgin_vs_E18	CA1	0.277088
0.0312851	0.118568	1	Rnasel	Virgin_vs_E18	CA1	0.138233
0.290506	0.118544	1	Sema6d	Virgin_vs_E18	CA1	0.515842
0.00105812	0.118452	1	4931406P16Rik	Virgin_vs_E18	CA1	0.0134184
0.15388	0.118399	1	4933427D14Rik	Virgin_vs_E18	CA1	0.359727
0.0576407	0.118396	1	Golga3	Virgin_vs_E18	CA1	0.201297
0.0320234	0.118185	1	Dst	Virgin_vs_E18	CA1	0.139503
0.108159	0.118117	1	Vbp1	Virgin_vs_E18	CA1	0.296127
0.166048	0.118082	1	Grm7	Virgin_vs_E18	CA1	0.377035
0.297152	0.117992	1	Mttp	Virgin_vs_E18	CA1	0.52073
0.179078	0.117979	1	Hectd2	Virgin_vs_E18	CA1	0.391364
0.134696	0.117735	1	Sgsm2	Virgin_vs_E18	CA1	0.33523
0.0261236	0.117646	1	Adgrb3	Virgin_vs_E18	CA1	0.124681
0.0465846	0.117619	1	Tob1	Virgin_vs_E18	CA1	0.176795
0.0117089	0.117603	1	Eef1a2	Virgin_vs_E18	CA1	0.0762981
0.0691369	0.11742	1	Sept2	Virgin_vs_E18	CA1	0.224019
0.0398914	0.117413	1	Ppp2r5a	Virgin_vs_E18	CA1	0.159237
0.0168282	0.11726	1	Mtss1l	Virgin_vs_E18	CA1	0.0958049
0.201121	0.116987	1	Ykt6	Virgin_vs_E18	CA1	0.419133
0.0689242	0.116849	1	Anapc5	Virgin_vs_E18	CA1	0.223453
0.0812355	0.116826	1	Galnt18	Virgin_vs_E18	CA1	0.248936
0.0898135	0.11673	1	Ctf2	Virgin_vs_E18	CA1	0.264493
0.0276029	0.116678	1	Mapk1ip1	Virgin_vs_E18	CA1	0.128733
0.0831818	0.116648	1	Sept11	Virgin_vs_E18	CA1	0.252161
0.0832889	0.116594	1	Ahctf1	Virgin_vs_E18	CA1	0.252355
0.0682739	0.116568	1	Ttc9c	Virgin_vs_E18	CA1	0.222325
0.0660246	0.116555	1	Snap23	Virgin_vs_E18	CA1	0.217165
0.204741	0.116473	1	Ulk1	Virgin_vs_E18	CA1	0.423524
0.103466	0.116459	1	C130071C03Rik	Virgin_vs_E18	CA1	0.28834
0.092588	0.116374	1	Hpcal1	Virgin_vs_E18	CA1	0.269329
0.0203219	0.116236	1	Slc22a17	Virgin_vs_E18	CA1	0.10723
0.108556	0.116185	1	Lifr	Virgin_vs_E18	CA1	0.296799
0.0587565	0.115873	1	Soat2	Virgin_vs_E18	CA1	0.203143
0.0615252	0.115807	1	Tnrc6a	Virgin_vs_E18	CA1	0.20915
0.044159	0.115711	1	Psd3	Virgin_vs_E18	CA1	0.171131
0.074339	0.115688	1	Hibadh	Virgin_vs_E18	CA1	0.234543
0.275012	0.115622	1	Acadm	Virgin_vs_E18	CA1	0.500262
0.0478497	0.115604	1	Cacna2d3	Virgin_vs_E18	CA1	0.179467
0.0183621	0.115584	1	Rdh12	Virgin_vs_E18	CA1	0.100453
0.0471785	0.115553	1	Nom1	Virgin_vs_E18	CA1	0.178203
0.0728433	0.115436	1	Kcnip3	Virgin_vs_E18	CA1	0.231699
0.0491947	0.115279	1	Prpf19	Virgin_vs_E18	CA1	0.182648
0.044794	0.115053	1	Rbfox2	Virgin_vs_E18	CA1	0.17297
0.0295935	0.114975	1	Polr2l	Virgin_vs_E18	CA1	0.13391
0.0325023	0.114827	1	Stx3	Virgin_vs_E18	CA1	0.140445
0.0653135	0.114799	1	Snhg4	Virgin_vs_E18	CA1	0.216156
0.173447	0.114682	1	Rfx7	Virgin_vs_E18	CA1	0.384631
0.173193	0.114488	1	Dixdc1	Virgin_vs_E18	CA1	0.384479
0.109357	0.114349	1	Herc1	Virgin_vs_E18	CA1	0.297607
0.031706	0.114297	1	Kit	Virgin_vs_E18	CA1	0.139112
0.0518671	0.114177	1	Mgat5	Virgin_vs_E18	CA1	0.18899
0.053377	0.114121	1	Syt11	Virgin_vs_E18	CA1	0.192819
0.178232	0.114001	1	Dexi	Virgin_vs_E18	CA1	0.391098
0.0347132	0.113736	1	Clic4	Virgin_vs_E18	CA1	0.146448
0.0852837	0.113699	1	Nipbl	Virgin_vs_E18	CA1	0.25668
0.0393084	0.113686	1	Banp	Virgin_vs_E18	CA1	0.157905
0.0467598	0.113604	1	Fam19a2	Virgin_vs_E18	CA1	0.177158
0.0150619	0.113593	1	Fam178a	Virgin_vs_E18	CA1	0.0893337
0.168097	0.113521	1	Rab23	Virgin_vs_E18	CA1	0.379767
0.0786324	0.113358	1	Rasgrf2	Virgin_vs_E18	CA1	0.243582
0.119361	0.113204	1	Supt20	Virgin_vs_E18	CA1	0.311487
0.00213648	0.113112	1	Nrxn1	Virgin_vs_E18	CA1	0.0226754
0.02224	0.113075	1	Dido1	Virgin_vs_E18	CA1	0.112187
0.123651	0.112851	1	Tonsl	Virgin_vs_E18	CA1	0.318247
0.0358909	0.112668	1	Mc1r	Virgin_vs_E18	CA1	0.14938
0.0332429	0.112659	1	Exoc1	Virgin_vs_E18	CA1	0.142556
0.0323889	0.112636	1	Zfp488	Virgin_vs_E18	CA1	0.140408
0.0760688	0.112572	1	Wdr61	Virgin_vs_E18	CA1	0.238104
0.284398	0.112416	1	Cnp	Virgin_vs_E18	CA1	0.509942
0.242915	0.112318	1	Ubr7	Virgin_vs_E18	CA1	0.464269
0.121818	0.112245	1	Fry	Virgin_vs_E18	CA1	0.314906
0.148318	0.11208	1	Cldn11	Virgin_vs_E18	CA1	0.352429
0.0393908	0.112003	1	Gm43536	Virgin_vs_E18	CA1	0.158128
0.179039	0.112002	1	Tor1aip2	Virgin_vs_E18	CA1	0.391364
0.0635928	0.11195	1	4930509G22Rik	Virgin_vs_E18	CA1	0.212736
0.0376283	0.111776	1	2410004P03Rik	Virgin_vs_E18	CA1	0.153505
0.00217365	0.111741	1	Cers4	Virgin_vs_E18	CA1	0.0227865
0.0307578	0.111733	1	Hes7	Virgin_vs_E18	CA1	0.13739
0.218893	0.111721	1	Paxip1	Virgin_vs_E18	CA1	0.441121
0.061817	0.111711	1	Ssbp2	Virgin_vs_E18	CA1	0.209657
0.180677	0.111696	1	Mtcl1	Virgin_vs_E18	CA1	0.393103
0.012072	0.111657	1	Smg1	Virgin_vs_E18	CA1	0.0775583
0.176181	0.111577	1	Utp14a	Virgin_vs_E18	CA1	0.388496
0.102428	0.111494	1	Rai1	Virgin_vs_E18	CA1	0.286709
0.0854258	0.111462	1	Spata5l1	Virgin_vs_E18	CA1	0.256887
0.0768293	0.111447	1	Fkbp4	Virgin_vs_E18	CA1	0.239954
0.0154098	0.111255	1	Ralgapa1	Virgin_vs_E18	CA1	0.0905343
0.0666041	0.111153	1	Dad1	Virgin_vs_E18	CA1	0.218704
0.0623808	0.111058	1	Kndc1	Virgin_vs_E18	CA1	0.210719
0.0411236	0.111048	1	Als2	Virgin_vs_E18	CA1	0.162314
0.116865	0.111023	1	Aurkaip1	Virgin_vs_E18	CA1	0.30751
0.0330104	0.110981	1	Nrd1	Virgin_vs_E18	CA1	0.141807
0.114255	0.110855	1	Ssb	Virgin_vs_E18	CA1	0.304456
0.0603266	0.110834	1	Sfr1	Virgin_vs_E18	CA1	0.206336
0.030635	0.110805	1	Ndufab1	Virgin_vs_E18	CA1	0.137007
0.00703	0.110673	1	Tmem130	Virgin_vs_E18	CA1	0.0532776
0.0896205	0.110631	1	D130043K22Rik	Virgin_vs_E18	CA1	0.26427
0.0211059	0.110562	1	Trim26	Virgin_vs_E18	CA1	0.109553
0.173294	0.110394	1	Qtrtd1	Virgin_vs_E18	CA1	0.384479
0.163221	0.110351	1	Acsl3	Virgin_vs_E18	CA1	0.373415
0.335742	0.110342	1	Denr	Virgin_vs_E18	CA1	0.558348
0.164796	0.110331	1	Dzank1	Virgin_vs_E18	CA1	0.375645
0.0742348	0.110146	1	Lsm14a	Virgin_vs_E18	CA1	0.23434
0.0777496	0.110042	1	Slc6a7	Virgin_vs_E18	CA1	0.241673
0.13466	0.11003	1	Gad2	Virgin_vs_E18	CA1	0.33523
0.0514543	0.109941	1	AC132444.6	Virgin_vs_E18	CA1	0.188497
0.147394	0.109869	1	Per3	Virgin_vs_E18	CA1	0.351376
0.0386535	0.109769	1	Gm17615	Virgin_vs_E18	CA1	0.156157
0.139417	0.109753	1	Cdkl2	Virgin_vs_E18	CA1	0.341772
0.129834	0.109701	1	Dopey1	Virgin_vs_E18	CA1	0.327692
0.156412	0.1097	1	Tada2a	Virgin_vs_E18	CA1	0.363223
0.184568	0.109599	1	Mrpl41	Virgin_vs_E18	CA1	0.398858
0.0486975	0.109564	1	Fuca2	Virgin_vs_E18	CA1	0.181912
0.116783	0.109446	1	Ints10	Virgin_vs_E18	CA1	0.307431
0.051016	0.109342	1	Tmem135	Virgin_vs_E18	CA1	0.187165
0.200881	0.109324	1	B4gat1	Virgin_vs_E18	CA1	0.41878
0.079968	0.109301	1	Sec61a2	Virgin_vs_E18	CA1	0.245969
0.292988	0.10902	1	Herpud1	Virgin_vs_E18	CA1	0.518053
0.12917	0.108969	1	Ccdc174	Virgin_vs_E18	CA1	0.327436
0.161257	0.108931	1	St7l	Virgin_vs_E18	CA1	0.370885
0.0562259	0.108879	1	Fmnl1	Virgin_vs_E18	CA1	0.198481
0.0586878	0.108817	1	Adrbk1	Virgin_vs_E18	CA1	0.203143
0.120035	0.108803	1	Dzip1	Virgin_vs_E18	CA1	0.312357
0.146448	0.108626	1	Acp1	Virgin_vs_E18	CA1	0.35088
0.125205	0.108458	1	Cacybp	Virgin_vs_E18	CA1	0.320562
0.0349149	0.108383	1	Vopp1	Virgin_vs_E18	CA1	0.146877
0.0581094	0.108295	1	Ppm1h	Virgin_vs_E18	CA1	0.202094
0.164915	0.108278	1	Celf1	Virgin_vs_E18	CA1	0.375712
0.168774	0.108259	1	Snhg1	Virgin_vs_E18	CA1	0.380437
0.306707	0.108104	1	Arhgap1	Virgin_vs_E18	CA1	0.531379
0.221853	0.108089	1	Emb	Virgin_vs_E18	CA1	0.443681
0.0413364	0.108041	1	Ppp2r5c	Virgin_vs_E18	CA1	0.163044
0.234474	0.107962	1	Bri3bp	Virgin_vs_E18	CA1	0.456151
0.0433498	0.107912	1	Dnajb1	Virgin_vs_E18	CA1	0.169395
0.0673874	0.107807	1	Gde1	Virgin_vs_E18	CA1	0.220292
0.0891686	0.10776	1	Slc22a23	Virgin_vs_E18	CA1	0.26351
0.0935058	0.107725	1	Nat14	Virgin_vs_E18	CA1	0.270757
0.156524	0.107631	1	Zfp316	Virgin_vs_E18	CA1	0.363267
0.322613	0.107286	1	Iqgap1	Virgin_vs_E18	CA1	0.546927
0.0863688	0.107218	1	Gm37214	Virgin_vs_E18	CA1	0.258754
0.152496	0.107206	1	Gatsl2	Virgin_vs_E18	CA1	0.35781
0.244686	0.10718	1	Vta1	Virgin_vs_E18	CA1	0.466148
0.0649338	0.107118	1	BC026585	Virgin_vs_E18	CA1	0.215637
0.104729	0.107099	1	1110032A03Rik	Virgin_vs_E18	CA1	0.290148
0.198129	0.106911	1	P4htm	Virgin_vs_E18	CA1	0.415547
0.0734215	0.10688	1	Unc45a	Virgin_vs_E18	CA1	0.232521
0.170352	0.106801	1	Nagk	Virgin_vs_E18	CA1	0.381562
0.0879702	0.106572	1	D5Ertd579e	Virgin_vs_E18	CA1	0.261947
0.142729	0.106547	1	Ms4a6c	Virgin_vs_E18	CA1	0.345853
0.108882	0.106483	1	Kansl1	Virgin_vs_E18	CA1	0.296865
0.240963	0.106445	1	Syt4	Virgin_vs_E18	CA1	0.462482
0.15696	0.106408	1	Asap1	Virgin_vs_E18	CA1	0.363858
0.101798	0.106346	1	Rps6kb1	Virgin_vs_E18	CA1	0.285822
0.088032	0.106315	1	Ostm1	Virgin_vs_E18	CA1	0.261947
0.0723928	0.106306	1	Syngr3	Virgin_vs_E18	CA1	0.230754
0.276854	0.106275	1	Kdm2b	Virgin_vs_E18	CA1	0.502625
0.021256	0.106226	1	Phip	Virgin_vs_E18	CA1	0.109847
0.141129	0.10621	1	1810041L15Rik	Virgin_vs_E18	CA1	0.343594
0.0464826	0.106113	1	Cplx2	Virgin_vs_E18	CA1	0.176795
0.125955	0.106051	1	Ankrd12	Virgin_vs_E18	CA1	0.321998
0.175344	0.10603	1	Recql	Virgin_vs_E18	CA1	0.387232
0.0896478	0.105997	1	Tardbp	Virgin_vs_E18	CA1	0.26427
0.0860302	0.105985	1	Flrt3	Virgin_vs_E18	CA1	0.257871
0.100456	0.105904	1	Dpy19l1	Virgin_vs_E18	CA1	0.283757
0.0434223	0.10583	1	Pnn	Virgin_vs_E18	CA1	0.169566
0.17868	0.105781	1	Csmd3	Virgin_vs_E18	CA1	0.391364
0.0444559	0.105751	1	Ercc6l2	Virgin_vs_E18	CA1	0.172036
0.0232552	0.105615	1	9530059O14Rik	Virgin_vs_E18	CA1	0.115706
0.0516149	0.105489	1	Arl16	Virgin_vs_E18	CA1	0.188773
0.0287972	0.105441	1	Loxl2	Virgin_vs_E18	CA1	0.131692
0.17022	0.105408	1	Usp38	Virgin_vs_E18	CA1	0.381562
0.0655234	0.105341	1	Oxsm	Virgin_vs_E18	CA1	0.216485
0.134897	0.10533	1	Ptpdc1	Virgin_vs_E18	CA1	0.335305
0.0850669	0.105247	1	Pde5a	Virgin_vs_E18	CA1	0.256421
0.104953	0.10523	1	Slc16a2	Virgin_vs_E18	CA1	0.290526
0.166165	0.105189	1	Casd1	Virgin_vs_E18	CA1	0.377035
0.0812768	0.105123	1	Pcsk5	Virgin_vs_E18	CA1	0.248936
0.0609139	0.105109	1	3110082I17Rik	Virgin_vs_E18	CA1	0.207552
0.0318494	0.104862	1	Tmem237	Virgin_vs_E18	CA1	0.139158
0.169404	0.104718	1	Taf4	Virgin_vs_E18	CA1	0.380981
0.180246	0.104677	1	Eif4enif1	Virgin_vs_E18	CA1	0.392312
0.0230211	0.104639	1	Gnas	Virgin_vs_E18	CA1	0.115017
0.4225	0.104603	1	Nras	Virgin_vs_E18	CA1	0.62446
0.00425441	0.104542	1	Lingo1	Virgin_vs_E18	CA1	0.0370121
0.15675	0.104513	1	Ep300	Virgin_vs_E18	CA1	0.363647
0.0955137	0.104449	1	Pcyox1	Virgin_vs_E18	CA1	0.274275
0.0187558	0.104212	1	Spns2	Virgin_vs_E18	CA1	0.101475
0.179834	0.104159	1	Rab11fip3	Virgin_vs_E18	CA1	0.391851
0.0799043	0.104121	1	Zbtb11	Virgin_vs_E18	CA1	0.245969
0.0907465	0.104028	1	Rundc3a	Virgin_vs_E18	CA1	0.266175
0.280633	0.104012	1	Rnf139	Virgin_vs_E18	CA1	0.506258
0.282307	0.103966	1	Prpf38a	Virgin_vs_E18	CA1	0.508165
0.274221	0.103816	1	Isca1	Virgin_vs_E18	CA1	0.499131
0.0376476	0.103801	1	Camk2n2	Virgin_vs_E18	CA1	0.153505
0.11014	0.103793	1	Hmgn3	Virgin_vs_E18	CA1	0.29854
0.10902	0.103646	1	Hdac4	Virgin_vs_E18	CA1	0.297101
0.222814	0.103554	1	Rfxap	Virgin_vs_E18	CA1	0.444071
0.123136	0.103522	1	Tmem109	Virgin_vs_E18	CA1	0.31706
0.126869	0.103471	1	Trp53i11	Virgin_vs_E18	CA1	0.323397
0.288061	0.103377	1	Evl	Virgin_vs_E18	CA1	0.513057
0.163858	0.103252	1	Tdrd7	Virgin_vs_E18	CA1	0.374523
0.110247	0.10318	1	Zeb1	Virgin_vs_E18	CA1	0.29854
0.138431	0.10305	1	Coq5	Virgin_vs_E18	CA1	0.340632
0.151419	0.102976	1	Efnb3	Virgin_vs_E18	CA1	0.356769
0.279609	0.102924	1	Ccar1	Virgin_vs_E18	CA1	0.504876
0.0783067	0.102919	1	Ssh2	Virgin_vs_E18	CA1	0.242858
0.226797	0.102788	1	Vldlr	Virgin_vs_E18	CA1	0.447882
0.154225	0.102745	1	Homer2	Virgin_vs_E18	CA1	0.360206
0.157251	0.102736	1	B930095G15Rik	Virgin_vs_E18	CA1	0.364349
0.173281	0.102659	1	Dnajc19	Virgin_vs_E18	CA1	0.384479
0.140655	0.102552	1	Tbc1d10b	Virgin_vs_E18	CA1	0.343067
0.367728	0.10247	1	Zfp30	Virgin_vs_E18	CA1	0.583264
0.15238	0.102399	1	Abhd18	Virgin_vs_E18	CA1	0.35781
0.0883573	0.102169	1	Fads1	Virgin_vs_E18	CA1	0.262174
0.05621	0.102169	1	Kdm2a	Virgin_vs_E18	CA1	0.198481
0.173268	0.102139	1	Trappc11	Virgin_vs_E18	CA1	0.384479
0.0474482	0.102125	1	Bsn	Virgin_vs_E18	CA1	0.178893
0.197598	0.102113	1	Cdh13	Virgin_vs_E18	CA1	0.415152
0.226159	0.101963	1	Surf4	Virgin_vs_E18	CA1	0.447223
0.159538	0.101962	1	Ppt1	Virgin_vs_E18	CA1	0.367793
0.0829568	0.10193	1	Zmynd8	Virgin_vs_E18	CA1	0.251826
0.199269	0.101882	1	Ccnc	Virgin_vs_E18	CA1	0.416749
0.292036	0.101831	1	Lypd1	Virgin_vs_E18	CA1	0.517309
0.00446841	0.101785	1	Ptprs	Virgin_vs_E18	CA1	0.0381958
0.131806	0.101723	1	Cbfa2t2	Virgin_vs_E18	CA1	0.330847
0.138146	0.101703	1	Dimt1	Virgin_vs_E18	CA1	0.340359
0.0963411	0.101701	1	Clec16a	Virgin_vs_E18	CA1	0.276247
0.0349053	0.101632	1	Mcf2l	Virgin_vs_E18	CA1	0.146877
0.0707295	0.101627	1	Tanc2	Virgin_vs_E18	CA1	0.227147
0.165565	0.101534	1	Ski	Virgin_vs_E18	CA1	0.376668
0.123709	0.101521	1	Gtdc1	Virgin_vs_E18	CA1	0.318257
0.127117	0.101281	1	Arntl	Virgin_vs_E18	CA1	0.323486
0.288381	0.101249	1	Reep3	Virgin_vs_E18	CA1	0.513307
0.168979	0.101206	1	Ptdss1	Virgin_vs_E18	CA1	0.380606
0.0601035	0.101053	1	Brpf1	Virgin_vs_E18	CA1	0.205864
0.0205111	0.101049	1	Gm43735	Virgin_vs_E18	CA1	0.107605
0.1001	0.101001	1	Nol4l	Virgin_vs_E18	CA1	0.283431
0.142432	0.10091	1	Cd164	Virgin_vs_E18	CA1	0.345849
0.249376	0.100876	1	Kcnj2	Virgin_vs_E18	CA1	0.471438
0.133598	0.100848	1	Lamp2	Virgin_vs_E18	CA1	0.333522
0.500862	0.100832	1	E330009J07Rik	Virgin_vs_E18	CA1	0.683744
0.130719	0.100767	1	Gucd1	Virgin_vs_E18	CA1	0.329091
0.288153	0.100735	1	Fam13a	Virgin_vs_E18	CA1	0.513057
0.145441	0.100672	1	Gm37065	Virgin_vs_E18	CA1	0.349404
0.143075	0.100488	1	Wdr20	Virgin_vs_E18	CA1	0.345862
0.211121	0.100439	1	Dnmt3a	Virgin_vs_E18	CA1	0.432168
0.0024082	0.100399	1	Fgfr1op2	Virgin_vs_E18	CA1	0.0245453
0.0158962	0.100389	1	Mpp1	Virgin_vs_E18	CA1	0.0926771
0.189453	0.100025	1	Vps9d1	Virgin_vs_E18	CA1	0.405581
0.219324	0.100017	1	Prpf38b	Virgin_vs_E18	CA1	0.441425
0.0667099	0.100017	1	Rcn2	Virgin_vs_E18	CA1	0.218807
0.15825	0.0999975	1	Gm21092	Virgin_vs_E18	CA1	0.36583
0.499993	0.0999649	1	Atp6v1h	Virgin_vs_E18	CA1	0.683494
0.260459	0.0999058	1	Asun	Virgin_vs_E18	CA1	0.484089
0.278796	0.0998729	1	Phyhipl	Virgin_vs_E18	CA1	0.503813
0.177512	0.0997496	1	Txn2	Virgin_vs_E18	CA1	0.390406
0.296615	0.0996563	1	Fdft1	Virgin_vs_E18	CA1	0.520403
0.00125018	0.0996169	1	Mrto4	Virgin_vs_E18	CA1	0.0151594
0.0607699	0.099572	1	Sdc2	Virgin_vs_E18	CA1	0.207302
0.193252	0.0994594	1	Psma2	Virgin_vs_E18	CA1	0.409851
0.251893	0.0993867	1	Rubcn	Virgin_vs_E18	CA1	0.474346
0.120978	0.0993272	1	Dnaja4	Virgin_vs_E18	CA1	0.313561
0.452842	0.0992792	1	Tyw5	Virgin_vs_E18	CA1	0.649077
0.18488	0.0992158	1	Fubp3	Virgin_vs_E18	CA1	0.399148
0.124045	0.0991874	1	Arhgef7	Virgin_vs_E18	CA1	0.318842
0.28809	0.0991724	1	St8sia4	Virgin_vs_E18	CA1	0.513057
0.120795	0.0991271	1	Pcdhga12	Virgin_vs_E18	CA1	0.313363
0.0837319	0.0988133	1	Cxadr	Virgin_vs_E18	CA1	0.253306
0.154862	0.0987423	1	Sec31a	Virgin_vs_E18	CA1	0.360976
0.360779	0.0987274	1	Phtf2	Virgin_vs_E18	CA1	0.577817
0.135578	0.0986729	1	Hdac1	Virgin_vs_E18	CA1	0.336052
0.103094	0.0985955	1	Amz2	Virgin_vs_E18	CA1	0.287888
0.0519924	0.0985696	1	Kdm7a	Virgin_vs_E18	CA1	0.18933
0.143162	0.0985461	1	Polr3e	Virgin_vs_E18	CA1	0.345906
0.145693	0.0984007	1	Sympk	Virgin_vs_E18	CA1	0.349811
0.0929969	0.0983367	1	Gfod1	Virgin_vs_E18	CA1	0.269948
0.16185	0.0982713	1	Ltk	Virgin_vs_E18	CA1	0.37181
0.0291761	0.0981439	1	Cep57l1	Virgin_vs_E18	CA1	0.132564
0.0514752	0.0980568	1	AK010878	Virgin_vs_E18	CA1	0.188497
0.24349	0.098041	1	Jade3	Virgin_vs_E18	CA1	0.464471
0.185439	0.0980179	1	Mrpl19	Virgin_vs_E18	CA1	0.400062
0.0305208	0.0979607	1	Wdr34	Virgin_vs_E18	CA1	0.136674
0.016304	0.0976408	1	Atxn2l	Virgin_vs_E18	CA1	0.0940786
0.423683	0.0975384	1	Grb10	Virgin_vs_E18	CA1	0.625578
0.0144408	0.0973345	1	Npdc1	Virgin_vs_E18	CA1	0.0874629
0.272195	0.0973153	1	Cacna1c	Virgin_vs_E18	CA1	0.497136
0.202637	0.0972899	1	Trnp1	Virgin_vs_E18	CA1	0.4208
0.0346561	0.0972297	1	Hadhb	Virgin_vs_E18	CA1	0.146312
0.104703	0.0972275	1	Fbxl12os	Virgin_vs_E18	CA1	0.290148
0.0234413	0.0971829	1	Atp6ap2	Virgin_vs_E18	CA1	0.116434
0.441639	0.0971723	1	Kmt2e	Virgin_vs_E18	CA1	0.639095
0.0518198	0.097169	1	Zfp142	Virgin_vs_E18	CA1	0.18897
0.198488	0.0970895	1	Mei4	Virgin_vs_E18	CA1	0.415855
0.429496	0.0970867	1	Tmem80	Virgin_vs_E18	CA1	0.629914
0.137717	0.0969461	1	Tacc1	Virgin_vs_E18	CA1	0.33973
0.0962986	0.0968784	1	Asrgl1	Virgin_vs_E18	CA1	0.276247
0.13483	0.0967716	1	Cntnap1	Virgin_vs_E18	CA1	0.335278
0.171403	0.0967409	1	Cyth1	Virgin_vs_E18	CA1	0.382116
0.0599343	0.0967389	1	Atp5g1	Virgin_vs_E18	CA1	0.205644
0.129647	0.0966489	1	Kcnc4	Virgin_vs_E18	CA1	0.327692
0.129592	0.0966404	1	Ttc8	Virgin_vs_E18	CA1	0.327692
0.0913268	0.0965104	1	Psme4	Virgin_vs_E18	CA1	0.266806
0.294475	0.0965015	1	Crebbp	Virgin_vs_E18	CA1	0.519126
0.0171627	0.0964268	1	Cd300lf	Virgin_vs_E18	CA1	0.0965271
0.142656	0.0963852	1	Auts2	Virgin_vs_E18	CA1	0.345853
0.172582	0.096337	1	Etfdh	Virgin_vs_E18	CA1	0.384016
0.132699	0.096284	1	Rpap1	Virgin_vs_E18	CA1	0.331926
0.133807	0.0962315	1	Il1rn	Virgin_vs_E18	CA1	0.333724
0.380065	0.096142	1	Lonp2	Virgin_vs_E18	CA1	0.59241
0.116719	0.0960146	1	Gin1	Virgin_vs_E18	CA1	0.307431
0.12494	0.0959557	1	Srpr	Virgin_vs_E18	CA1	0.320162
0.221055	0.0959511	1	Dirc2	Virgin_vs_E18	CA1	0.44309
0.0772791	0.0958677	1	Pex1	Virgin_vs_E18	CA1	0.240975
0.146865	0.0958493	1	Pisd	Virgin_vs_E18	CA1	0.351376
0.293073	0.0957887	1	Chd6	Virgin_vs_E18	CA1	0.518053
0.0402037	0.0955642	1	Ccdc47	Virgin_vs_E18	CA1	0.159789
0.0965286	0.0955513	1	Pten	Virgin_vs_E18	CA1	0.276649
0.200286	0.095519	1	Fryl	Virgin_vs_E18	CA1	0.418283
0.188805	0.0952952	1	Ndufs7	Virgin_vs_E18	CA1	0.404798
0.138238	0.0951155	1	Gtf3c2	Virgin_vs_E18	CA1	0.340444
0.0881642	0.0951044	1	Alms1	Virgin_vs_E18	CA1	0.261947
0.149501	0.0951008	1	Abhd8	Virgin_vs_E18	CA1	0.354238
0.0129139	0.0950742	1	Phyh	Virgin_vs_E18	CA1	0.081053
0.0790603	0.0950502	1	Lsm14b	Virgin_vs_E18	CA1	0.244081
0.0470821	0.0950321	1	Hibch	Virgin_vs_E18	CA1	0.178064
0.255137	0.0949898	1	Dcn	Virgin_vs_E18	CA1	0.477564
0.0217587	0.0949318	1	Srpk1	Virgin_vs_E18	CA1	0.111082
0.170215	0.0948672	1	Traip	Virgin_vs_E18	CA1	0.381562
0.124741	0.0946361	1	Sesn1	Virgin_vs_E18	CA1	0.320088
0.157406	0.0945855	1	Zfp65	Virgin_vs_E18	CA1	0.36445
0.127103	0.0944695	1	Smarcad1	Virgin_vs_E18	CA1	0.323486
0.160684	0.0944593	1	Zfp639	Virgin_vs_E18	CA1	0.369856
0.210229	0.0944079	1	Timm9	Virgin_vs_E18	CA1	0.430937
0.1802	0.0943949	1	Asna1	Virgin_vs_E18	CA1	0.392312
0.0966986	0.0943703	1	Milr1	Virgin_vs_E18	CA1	0.276867
0.229331	0.0943351	1	Epha5	Virgin_vs_E18	CA1	0.450166
0.0323982	0.0942822	1	Cdc26	Virgin_vs_E18	CA1	0.140408
0.289878	0.0941537	1	Nudcd1	Virgin_vs_E18	CA1	0.51491
0.16034	0.0940287	1	Noa1	Virgin_vs_E18	CA1	0.369355
0.0265077	0.0939021	1	Slc25a42	Virgin_vs_E18	CA1	0.125719
0.0518294	0.0936752	1	Aifm3	Virgin_vs_E18	CA1	0.18897
0.183844	0.0934487	1	Chpf2	Virgin_vs_E18	CA1	0.397934
0.156005	0.0933977	1	Jagn1	Virgin_vs_E18	CA1	0.362491
0.208883	0.0933031	1	Map6	Virgin_vs_E18	CA1	0.429225
0.26798	0.0932296	1	Ackr1	Virgin_vs_E18	CA1	0.492036
0.352257	0.0932225	1	Dner	Virgin_vs_E18	CA1	0.570067
0.124877	0.0931886	1	Pcdhb22	Virgin_vs_E18	CA1	0.320162
0.300723	0.0931883	1	Stox2	Virgin_vs_E18	CA1	0.52526
0.345093	0.0929568	1	Ube2f	Virgin_vs_E18	CA1	0.564515
0.220913	0.0929261	1	Fam73b	Virgin_vs_E18	CA1	0.442956
0.0332366	0.0928775	1	Ablim2	Virgin_vs_E18	CA1	0.142556
0.1088	0.0928651	1	Gm12940	Virgin_vs_E18	CA1	0.296865
0.205511	0.0928554	1	Top1	Virgin_vs_E18	CA1	0.42467
0.242753	0.0928505	1	Sbds	Virgin_vs_E18	CA1	0.464269
0.186	0.0928453	1	Tspan33	Virgin_vs_E18	CA1	0.400978
0.308757	0.0927427	1	Nfic	Virgin_vs_E18	CA1	0.533179
0.110613	0.0926488	1	Gcn1l1	Virgin_vs_E18	CA1	0.298812
0.422249	0.0926241	1	Slc35f1	Virgin_vs_E18	CA1	0.624245
0.0799098	0.0926049	1	Gm21917	Virgin_vs_E18	CA1	0.245969
0.151959	0.0925813	1	Ces2b	Virgin_vs_E18	CA1	0.357325
0.204446	0.0924357	1	Me3	Virgin_vs_E18	CA1	0.423162
0.114396	0.0923867	1	Kdsr	Virgin_vs_E18	CA1	0.304692
0.380946	0.0923486	1	Gm4631	Virgin_vs_E18	CA1	0.592996
0.151754	0.0923302	1	Serf2	Virgin_vs_E18	CA1	0.357129
0.406836	0.0923137	1	Zzz3	Virgin_vs_E18	CA1	0.614115
0.0286742	0.0923088	1	Ndfip2	Virgin_vs_E18	CA1	0.131436
0.0523308	0.0921997	1	Prdm11	Virgin_vs_E18	CA1	0.190091
0.148208	0.0921375	1	Ddx39b	Virgin_vs_E18	CA1	0.352308
0.112454	0.0919159	1	Elovl5	Virgin_vs_E18	CA1	0.301706
0.211148	0.0918706	1	Dcun1d1	Virgin_vs_E18	CA1	0.432168
0.0939045	0.0917858	1	Ankrd13a	Virgin_vs_E18	CA1	0.271237
0.235049	0.0917467	1	Prrc2c	Virgin_vs_E18	CA1	0.456451
0.0754844	0.0917291	1	Mpdz	Virgin_vs_E18	CA1	0.236759
0.175446	0.0915916	1	Cpa6	Virgin_vs_E18	CA1	0.387311
0.235699	0.0915836	1	4930447C04Rik	Virgin_vs_E18	CA1	0.456719
0.342895	0.0915766	1	Mark2	Virgin_vs_E18	CA1	0.562789
0.0319504	0.0915645	1	Nlgn2	Virgin_vs_E18	CA1	0.139355
0.222596	0.0914538	1	Slc39a6	Virgin_vs_E18	CA1	0.444071
0.00712276	0.0914531	1	Enox1	Virgin_vs_E18	CA1	0.0536364
0.28863	0.0912756	1	Tfg	Virgin_vs_E18	CA1	0.513441
0.646556	0.0911432	1	Gid8	Virgin_vs_E18	CA1	0.789988
0.254816	0.0910951	1	Ppp6r1	Virgin_vs_E18	CA1	0.477252
0.171473	0.0909033	1	Rpn2	Virgin_vs_E18	CA1	0.382127
0.286302	0.0909004	1	Iws1	Virgin_vs_E18	CA1	0.511621
0.116196	0.0907813	1	Slc3a2	Virgin_vs_E18	CA1	0.306436
0.0119783	0.0907193	1	Sez6l	Virgin_vs_E18	CA1	0.0774398
0.123132	0.0906934	1	Gpt2	Virgin_vs_E18	CA1	0.31706
0.24323	0.0906816	1	Tmem178	Virgin_vs_E18	CA1	0.464269
0.185255	0.0906192	1	2210013O21Rik	Virgin_vs_E18	CA1	0.399811
0.19346	0.090313	1	Ddx24	Virgin_vs_E18	CA1	0.410094
0.122923	0.0901402	1	Ndufv3	Virgin_vs_E18	CA1	0.316791
0.147025	0.0900952	1	AI846148	Virgin_vs_E18	CA1	0.351376
0.301528	0.0898181	1	Cog3	Virgin_vs_E18	CA1	0.526353
0.27237	0.0897756	1	Ehmt1	Virgin_vs_E18	CA1	0.497146
0.147255	0.0897532	1	Chd9	Virgin_vs_E18	CA1	0.351376
0.202593	0.0897159	1	B630019K06Rik	Virgin_vs_E18	CA1	0.4208
0.372766	0.0895475	1	Cinp	Virgin_vs_E18	CA1	0.587534
0.0340378	0.0893932	1	Dhrs7b	Virgin_vs_E18	CA1	0.144636
0.208641	0.089366	1	Mgat1	Virgin_vs_E18	CA1	0.428991
0.226391	0.089277	1	Cbx1	Virgin_vs_E18	CA1	0.447531
0.11003	0.0892401	1	Ythdc1	Virgin_vs_E18	CA1	0.29854
0.168734	0.0892258	1	Klf10	Virgin_vs_E18	CA1	0.380437
0.262232	0.0892177	1	Mbd3	Virgin_vs_E18	CA1	0.485807
0.224496	0.0892024	1	Asph	Virgin_vs_E18	CA1	0.445132
0.0813333	0.0890273	1	Slc35a1	Virgin_vs_E18	CA1	0.248936
0.220721	0.0888889	1	Lhx5	Virgin_vs_E18	CA1	0.442777
0.189994	0.088839	1	Otud4	Virgin_vs_E18	CA1	0.406015
0.0560937	0.0888354	1	Pspc1	Virgin_vs_E18	CA1	0.198481
0.219905	0.0887424	1	Rev1	Virgin_vs_E18	CA1	0.442049
0.239283	0.0886268	1	Rasl10a	Virgin_vs_E18	CA1	0.460858
0.0305373	0.0885973	1	Dtl	Virgin_vs_E18	CA1	0.136674
0.00433028	0.0885597	1	Synrg	Virgin_vs_E18	CA1	0.0374506
0.1947	0.0885349	1	Tpp2	Virgin_vs_E18	CA1	0.41129
0.00223027	0.0883103	1	Slitrk1	Virgin_vs_E18	CA1	0.0231326
0.225735	0.0882067	1	Vti1b	Virgin_vs_E18	CA1	0.446835
0.310371	0.0882013	1	Ncbp1	Virgin_vs_E18	CA1	0.534805
0.0634868	0.0881771	1	Pkd2	Virgin_vs_E18	CA1	0.212736
0.0520503	0.088079	1	Tm9sf2	Virgin_vs_E18	CA1	0.189423
0.151488	0.088037	1	Klc2	Virgin_vs_E18	CA1	0.356789
0.050258	0.0880278	1	Prpf8	Virgin_vs_E18	CA1	0.185541
0.427552	0.0880057	1	Txndc11	Virgin_vs_E18	CA1	0.628973
0.118281	0.0880029	1	4932438A13Rik	Virgin_vs_E18	CA1	0.309654
0.145222	0.0879824	1	Zfyve28	Virgin_vs_E18	CA1	0.349161
0.405255	0.0879564	1	Sec24d	Virgin_vs_E18	CA1	0.613147
0.0276391	0.0879529	1	Slc35a3	Virgin_vs_E18	CA1	0.1288
0.167056	0.0878417	1	Zfp68	Virgin_vs_E18	CA1	0.378159
0.362327	0.0877821	1	Yod1	Virgin_vs_E18	CA1	0.579335
0.0438733	0.0877293	1	Snapc3	Virgin_vs_E18	CA1	0.17031
0.204151	0.0876379	1	Tprkb	Virgin_vs_E18	CA1	0.422899
0.00712295	0.0876166	1	Adtrp	Virgin_vs_E18	CA1	0.0536364
0.125547	0.0874811	1	Zc3hc1	Virgin_vs_E18	CA1	0.321296
0.106252	0.0874545	1	Ndufc2	Virgin_vs_E18	CA1	0.292541
0.119997	0.0874046	1	Mrpl9	Virgin_vs_E18	CA1	0.312357
0.412384	0.0873614	1	Fam20b	Virgin_vs_E18	CA1	0.617896
0.0274848	0.0871872	1	Ing4	Virgin_vs_E18	CA1	0.128488
0.018426	0.087151	1	Acad9	Virgin_vs_E18	CA1	0.100616
0.0184893	0.0870959	1	Telo2	Virgin_vs_E18	CA1	0.100774
0.134211	0.0870558	1	Mydgf	Virgin_vs_E18	CA1	0.334306
0.150026	0.0870359	1	Prkcsh	Virgin_vs_E18	CA1	0.355053
0.595784	0.087019	1	Cript	Virgin_vs_E18	CA1	0.752819
0.129251	0.0869992	1	Tmem55b	Virgin_vs_E18	CA1	0.327498
0.0489084	0.086856	1	Lsg1	Virgin_vs_E18	CA1	0.182275
0.720023	0.0867282	1	Bccip	Virgin_vs_E18	CA1	0.837345
0.0249675	0.0867252	1	Gm10636	Virgin_vs_E18	CA1	0.12115
0.135466	0.0867194	1	Sod1	Virgin_vs_E18	CA1	0.336052
0.170048	0.0866896	1	4933439C10Rik	Virgin_vs_E18	CA1	0.381562
0.246891	0.0866851	1	Cpsf6	Virgin_vs_E18	CA1	0.468527
0.428335	0.0866081	1	Slc2a13	Virgin_vs_E18	CA1	0.628973
0.2702	0.0865744	1	Gpx1	Virgin_vs_E18	CA1	0.494415
0.197382	0.0864819	1	Rrnad1	Virgin_vs_E18	CA1	0.415018
0.12639	0.0864007	1	Erp44	Virgin_vs_E18	CA1	0.32264
0.236155	0.0863065	1	Acer3	Virgin_vs_E18	CA1	0.457002
0.317999	0.0862846	1	Zcchc7	Virgin_vs_E18	CA1	0.542388
0.331328	0.0861749	1	Mmd2	Virgin_vs_E18	CA1	0.554508
0.12891	0.0861462	1	Naa15	Virgin_vs_E18	CA1	0.327095
0.13181	0.0860507	1	Rmnd1	Virgin_vs_E18	CA1	0.330847
0.0299527	0.0859801	1	Celf2	Virgin_vs_E18	CA1	0.13457
0.154806	0.0859798	1	Srrm4	Virgin_vs_E18	CA1	0.360976
0.174746	0.0859026	1	Znfx1	Virgin_vs_E18	CA1	0.386346
0.27631	0.0858882	1	Arnt	Virgin_vs_E18	CA1	0.502057
0.177897	0.0858527	1	B230219D22Rik	Virgin_vs_E18	CA1	0.390717
0.182726	0.0857241	1	Ntng1	Virgin_vs_E18	CA1	0.396243
0.394639	0.0857103	1	Slc38a9	Virgin_vs_E18	CA1	0.604619
0.146653	0.0856224	1	Hnrnpll	Virgin_vs_E18	CA1	0.351168
0.114634	0.0855697	1	Chordc1	Virgin_vs_E18	CA1	0.304754
0.00873406	0.0854406	1	Cacna1e	Virgin_vs_E18	CA1	0.0622323
0.232463	0.0854053	1	Smg5	Virgin_vs_E18	CA1	0.452917
0.370383	0.085345	1	Tcerg1	Virgin_vs_E18	CA1	0.5857
0.293315	0.08522	1	Adcy3	Virgin_vs_E18	CA1	0.518291
0.001552	0.084952	1	Mtm1	Virgin_vs_E18	CA1	0.0176886
0.215298	0.0849368	1	Jakmip1	Virgin_vs_E18	CA1	0.436911
0.0816147	0.0849013	1	Gxylt2	Virgin_vs_E18	CA1	0.249286
0.0524316	0.0848139	1	Cnr1	Virgin_vs_E18	CA1	0.190222
0.073313	0.0847903	1	Htt	Virgin_vs_E18	CA1	0.232428
0.0909326	0.0847713	1	Susd4	Virgin_vs_E18	CA1	0.266443
0.120167	0.0847313	1	Pomgnt1	Virgin_vs_E18	CA1	0.312562
0.196641	0.0846934	1	Cacna1d	Virgin_vs_E18	CA1	0.414051
0.618881	0.0845607	1	Onecut2	Virgin_vs_E18	CA1	0.769013
0.142924	0.0845158	1	Sft2d1	Virgin_vs_E18	CA1	0.345862
0.0750123	0.0843769	1	Gm44591	Virgin_vs_E18	CA1	0.236034
0.0198321	0.0843313	1	Ube2b	Virgin_vs_E18	CA1	0.105934
0.295842	0.0843211	1	Ppp2r2d	Virgin_vs_E18	CA1	0.520403
0.169562	0.0842978	1	Tmcc1	Virgin_vs_E18	CA1	0.38119
0.0882606	0.0842015	1	Dgke	Virgin_vs_E18	CA1	0.262019
0.246477	0.0841828	1	Lrif1	Virgin_vs_E18	CA1	0.46843
0.201586	0.0841123	1	Olfr56	Virgin_vs_E18	CA1	0.419656
0.113915	0.0840536	1	Lzts3	Virgin_vs_E18	CA1	0.303964
0.304919	0.0840425	1	Katnal1	Virgin_vs_E18	CA1	0.53007
0.215476	0.0840232	1	Utp11l	Virgin_vs_E18	CA1	0.437122
0.209945	0.0839954	1	Ttc13	Virgin_vs_E18	CA1	0.430655
0.171102	0.0839315	1	Kcnh3	Virgin_vs_E18	CA1	0.382093
0.187162	0.0838888	1	Frmd6	Virgin_vs_E18	CA1	0.402744
0.118982	0.0838636	1	Cdkl4	Virgin_vs_E18	CA1	0.310716
0.270096	0.0838461	1	Gnai2	Virgin_vs_E18	CA1	0.494415
0.188638	0.0838315	1	Spata1	Virgin_vs_E18	CA1	0.404588
0.15893	0.0837733	1	Adora1	Virgin_vs_E18	CA1	0.366823
0.141404	0.0832922	1	Abcb9	Virgin_vs_E18	CA1	0.344061
0.168097	0.0831558	1	Ccdc12	Virgin_vs_E18	CA1	0.379767
0.105782	0.0831122	1	Elovl6	Virgin_vs_E18	CA1	0.291793
0.0296009	0.0831061	1	Wdr89	Virgin_vs_E18	CA1	0.13391
0.283881	0.0831038	1	Med21	Virgin_vs_E18	CA1	0.509773
0.233512	0.0831008	1	Ssbp3	Virgin_vs_E18	CA1	0.454428
0.252401	0.0829694	1	Ktn1	Virgin_vs_E18	CA1	0.474466
0.602513	0.0829632	1	Hipk3	Virgin_vs_E18	CA1	0.756971
0.321326	0.0829474	1	Hdlbp	Virgin_vs_E18	CA1	0.54558
0.0112507	0.0829413	1	Poldip2	Virgin_vs_E18	CA1	0.0745647
0.0727342	0.0829003	1	Cdk14	Virgin_vs_E18	CA1	0.231699
0.25594	0.0828944	1	Pak7	Virgin_vs_E18	CA1	0.478748
0.129066	0.0828418	1	Cdipt	Virgin_vs_E18	CA1	0.327311
0.196519	0.0827875	1	Nup153	Virgin_vs_E18	CA1	0.414004
0.403928	0.0827803	1	Hps3	Virgin_vs_E18	CA1	0.612611
0.0212119	0.082735	1	Pvr	Virgin_vs_E18	CA1	0.109847
0.220172	0.0827006	1	Pcnx2	Virgin_vs_E18	CA1	0.442049
0.203837	0.0825511	1	Bscl2	Virgin_vs_E18	CA1	0.422547
0.150361	0.0824476	1	Zfhx2	Virgin_vs_E18	CA1	0.355273
0.129852	0.0824193	1	Atrn	Virgin_vs_E18	CA1	0.327692
0.16848	0.0824052	1	Ccnl2	Virgin_vs_E18	CA1	0.380358
0.12963	0.082378	1	Fam162a	Virgin_vs_E18	CA1	0.327692
0.289894	0.0823328	1	Rbm25	Virgin_vs_E18	CA1	0.51491
0.115714	0.0821727	1	Polb	Virgin_vs_E18	CA1	0.305438
0.392122	0.0820725	1	Rnf24	Virgin_vs_E18	CA1	0.602422
0.0291036	0.0820406	1	Slc4a10	Virgin_vs_E18	CA1	0.132373
0.0193711	0.0818358	1	Akap5	Virgin_vs_E18	CA1	0.104133
0.0194292	0.0818355	1	Sst	Virgin_vs_E18	CA1	0.104255
0.388114	0.0818325	1	Clmn	Virgin_vs_E18	CA1	0.599395
0.259283	0.0817437	1	Grsf1	Virgin_vs_E18	CA1	0.483003
0.0905111	0.0817238	1	Cmas	Virgin_vs_E18	CA1	0.265868
0.251293	0.0817141	1	Purg	Virgin_vs_E18	CA1	0.473519
0.460365	0.0817067	1	Ube2e1	Virgin_vs_E18	CA1	0.654754
0.269257	0.0817055	1	Eea1	Virgin_vs_E18	CA1	0.493303
0.158827	0.0817047	1	Selk	Virgin_vs_E18	CA1	0.36673
0.245635	0.0816711	1	Sdc3	Virgin_vs_E18	CA1	0.46735
0.340839	0.0816644	1	Pdss1	Virgin_vs_E18	CA1	0.56091
0.340842	0.0816614	1	Dscam	Virgin_vs_E18	CA1	0.56091
0.132203	0.0814715	1	Kctd14	Virgin_vs_E18	CA1	0.330987
0.0729059	0.0814689	1	Anapc4	Virgin_vs_E18	CA1	0.231762
0.119554	0.0814545	1	B3galnt1	Virgin_vs_E18	CA1	0.311656
0.0438248	0.0813353	1	Map2k7	Virgin_vs_E18	CA1	0.17031
0.242979	0.0813201	1	Ncor2	Virgin_vs_E18	CA1	0.464269
0.125136	0.0813113	1	Smim19	Virgin_vs_E18	CA1	0.320524
0.247787	0.0812863	1	Faah	Virgin_vs_E18	CA1	0.469238
0.342531	0.0812557	1	Plekha7	Virgin_vs_E18	CA1	0.562375
0.131105	0.0811328	1	Lman2	Virgin_vs_E18	CA1	0.329641
0.230715	0.0810529	1	Cstf2	Virgin_vs_E18	CA1	0.451951
0.380811	0.0808749	1	Ept1	Virgin_vs_E18	CA1	0.592944
0.203912	0.0808473	1	Synj2bp	Virgin_vs_E18	CA1	0.422552
0.100049	0.0808091	1	Atg16l1	Virgin_vs_E18	CA1	0.283423
0.0489909	0.0808091	1	Sdf2	Virgin_vs_E18	CA1	0.182352
0.151175	0.0808079	1	Prpf39	Virgin_vs_E18	CA1	0.356338
0.158693	0.0806832	1	Slc9a8	Virgin_vs_E18	CA1	0.366565
0.215092	0.0805494	1	Pcdha6	Virgin_vs_E18	CA1	0.436911
0.326179	0.0805187	1	Pfn1	Virgin_vs_E18	CA1	0.550907
0.247424	0.0804901	1	Tapbpl	Virgin_vs_E18	CA1	0.469084
0.452795	0.0803948	1	Eftud2	Virgin_vs_E18	CA1	0.649077
0.0312418	0.0802792	1	Zfp932	Virgin_vs_E18	CA1	0.138233
0.376716	0.0802508	1	Cntn1	Virgin_vs_E18	CA1	0.590251
0.307139	0.0802024	1	Cpeb3	Virgin_vs_E18	CA1	0.531543
0.0629324	0.0801943	1	Paqr8	Virgin_vs_E18	CA1	0.21162
0.0219947	0.0801512	1	Fam133b	Virgin_vs_E18	CA1	0.111605
0.168056	0.0800977	1	BC030499	Virgin_vs_E18	CA1	0.379767
0.305646	0.0800353	1	Hnrnph3	Virgin_vs_E18	CA1	0.530686
0.26088	0.079982	1	Zfp451	Virgin_vs_E18	CA1	0.484443
0.115325	0.0799198	1	Trim44	Virgin_vs_E18	CA1	0.304874
0.332774	0.0798917	1	Zbtb4	Virgin_vs_E18	CA1	0.556224
0.135598	0.0798029	1	Podxl2	Virgin_vs_E18	CA1	0.336052
0.11751	0.0795895	1	Rab6b	Virgin_vs_E18	CA1	0.308793
0.0598188	0.0795408	1	Cntnap5a	Virgin_vs_E18	CA1	0.205487
0.174186	0.0790707	1	Spag7	Virgin_vs_E18	CA1	0.385835
0.0946151	0.0790237	1	Cspg5	Virgin_vs_E18	CA1	0.272493
0.0455425	0.0789373	1	Mbnl2	Virgin_vs_E18	CA1	0.174317
0.065799	0.0788257	1	Med16	Virgin_vs_E18	CA1	0.21703
0.259406	0.0788099	1	Smg9	Virgin_vs_E18	CA1	0.48308
0.412014	0.0786757	1	Slc6a17	Virgin_vs_E18	CA1	0.61781
0.175935	0.0786735	1	Gclc	Virgin_vs_E18	CA1	0.388124
0.111798	0.0786321	1	Papolg	Virgin_vs_E18	CA1	0.300682
0.369014	0.0786264	1	Stau2	Virgin_vs_E18	CA1	0.584347
0.135815	0.0785399	1	Fbxo45	Virgin_vs_E18	CA1	0.336447
0.0456215	0.0785371	1	Rfwd2	Virgin_vs_E18	CA1	0.174334
0.401768	0.0785226	1	H2afz	Virgin_vs_E18	CA1	0.611807
0.107143	0.0784887	1	St7	Virgin_vs_E18	CA1	0.294169
0.231239	0.0784224	1	Bcl2l1	Virgin_vs_E18	CA1	0.452029
0.169168	0.0783873	1	Map2	Virgin_vs_E18	CA1	0.380708
0.549732	0.0783221	1	Ap3m1	Virgin_vs_E18	CA1	0.722548
0.23989	0.0782789	1	Arpp19	Virgin_vs_E18	CA1	0.461044
0.115614	0.0782456	1	Gt(ROSA)26Sor	Virgin_vs_E18	CA1	0.30531
0.0916373	0.0782403	1	Ago3	Virgin_vs_E18	CA1	0.267389
0.221867	0.0782294	1	Gstm1	Virgin_vs_E18	CA1	0.443681
0.117622	0.0780768	1	Rasa4	Virgin_vs_E18	CA1	0.308948
0.191294	0.0780227	1	Ubl3	Virgin_vs_E18	CA1	0.407396
0.054542	0.0779725	1	Hars	Virgin_vs_E18	CA1	0.194755
0.306847	0.0779253	1	Wbscr22	Virgin_vs_E18	CA1	0.531379
0.19053	0.0779212	1	Igsf9	Virgin_vs_E18	CA1	0.406613
0.219018	0.0779059	1	Iqsec3	Virgin_vs_E18	CA1	0.441121
0.143738	0.0779048	1	Ptprk	Virgin_vs_E18	CA1	0.347014
0.12604	0.0777708	1	Snx14	Virgin_vs_E18	CA1	0.321998
0.0970058	0.0776853	1	Cnpy3	Virgin_vs_E18	CA1	0.277288
0.114613	0.0776396	1	Adgra1	Virgin_vs_E18	CA1	0.304754
0.358428	0.077612	1	Jarid2	Virgin_vs_E18	CA1	0.575304
0.0585006	0.07759	1	Ppfia2	Virgin_vs_E18	CA1	0.202975
0.333119	0.0775098	1	Slc2a3	Virgin_vs_E18	CA1	0.556238
0.263782	0.0774432	1	Samd8	Virgin_vs_E18	CA1	0.487523
0.393333	0.0774148	1	Ube2l3	Virgin_vs_E18	CA1	0.603651
0.155869	0.077387	1	Bcap31	Virgin_vs_E18	CA1	0.362339
0.10879	0.0772245	1	Mkks	Virgin_vs_E18	CA1	0.296865
0.348309	0.0772118	1	Crtc1	Virgin_vs_E18	CA1	0.567268
0.649449	0.0771484	1	Opa3	Virgin_vs_E18	CA1	0.79208
0.23998	0.077097	1	Akap8	Virgin_vs_E18	CA1	0.461066
0.184257	0.0770542	1	Zfr2	Virgin_vs_E18	CA1	0.398628
0.377522	0.0769542	1	Tfdp2	Virgin_vs_E18	CA1	0.591003
0.101574	0.0768809	1	Aplp2	Virgin_vs_E18	CA1	0.285446
0.284716	0.0768481	1	Tceal5	Virgin_vs_E18	CA1	0.509942
0.345825	0.0768304	1	Acvr1b	Virgin_vs_E18	CA1	0.565258
0.2075	0.0768054	1	Gm4924	Virgin_vs_E18	CA1	0.427694
0.484203	0.0767178	1	Arid4b	Virgin_vs_E18	CA1	0.67192
0.222651	0.0766431	1	Limch1	Virgin_vs_E18	CA1	0.444071
0.177016	0.0766119	1	Thra	Virgin_vs_E18	CA1	0.390007
0.0875167	0.0765968	1	Birc6	Virgin_vs_E18	CA1	0.260997
0.0640926	0.0765445	1	Kctd4	Virgin_vs_E18	CA1	0.213908
0.157885	0.0765122	1	Adcy9	Virgin_vs_E18	CA1	0.365272
0.0459987	0.0764149	1	Pdk2	Virgin_vs_E18	CA1	0.175434
0.436296	0.0763656	1	Tmem55a	Virgin_vs_E18	CA1	0.635196
0.372642	0.0762355	1	Pofut1	Virgin_vs_E18	CA1	0.587534
0.0341469	0.0762301	1	Rbm8a	Virgin_vs_E18	CA1	0.14489
0.364318	0.0762013	1	Sacm1l	Virgin_vs_E18	CA1	0.580566
0.296376	0.0761954	1	Tmem50b	Virgin_vs_E18	CA1	0.520403
0.260524	0.0761667	1	U2surp	Virgin_vs_E18	CA1	0.484089
0.379301	0.0761567	1	Dvl1	Virgin_vs_E18	CA1	0.592144
0.240508	0.0761259	1	Smek2	Virgin_vs_E18	CA1	0.461778
0.462964	0.0759847	1	Kdm1a	Virgin_vs_E18	CA1	0.655912
0.344912	0.0759833	1	Dmxl2	Virgin_vs_E18	CA1	0.564515
0.69887	0.0759179	1	Ift80	Virgin_vs_E18	CA1	0.823494
0.000226788	0.0759052	1	Hsd3b2	Virgin_vs_E18	CA1	0.00387359
0.284865	0.0758428	1	Fxn	Virgin_vs_E18	CA1	0.509981
0.0124533	0.0757338	1	Tmem209	Virgin_vs_E18	CA1	0.0788374
0.507326	0.0757068	1	Ryr2	Virgin_vs_E18	CA1	0.689601
0.0998678	0.0756635	1	Gemin8	Virgin_vs_E18	CA1	0.283183
0.222828	0.0756221	1	Paqr3	Virgin_vs_E18	CA1	0.444071
0.197666	0.0756209	1	Numa1	Virgin_vs_E18	CA1	0.415152
0.206764	0.0754144	1	Trip11	Virgin_vs_E18	CA1	0.426808
0.0209184	0.0753045	1	1500004A13Rik	Virgin_vs_E18	CA1	0.108868
0.295477	0.0752281	1	Irf2	Virgin_vs_E18	CA1	0.519958
0.419014	0.0751096	1	Synj2	Virgin_vs_E18	CA1	0.622278
0.0769298	0.0751043	1	Mto1	Virgin_vs_E18	CA1	0.24014
0.264443	0.0749224	1	B2m	Virgin_vs_E18	CA1	0.488285
0.328044	0.0748212	1	Marc2	Virgin_vs_E18	CA1	0.551996
0.212063	0.0748177	1	Prex2	Virgin_vs_E18	CA1	0.433036
0.236136	0.0747816	1	Irak1bp1	Virgin_vs_E18	CA1	0.457002
0.183143	0.0747053	1	Ctnnbip1	Virgin_vs_E18	CA1	0.396854
0.395435	0.0745926	1	Ago2	Virgin_vs_E18	CA1	0.605139
0.404629	0.0745358	1	Thumpd3	Virgin_vs_E18	CA1	0.612672
0.400022	0.0743655	1	Gabpa	Virgin_vs_E18	CA1	0.609842
0.295342	0.0742907	1	Mzf1	Virgin_vs_E18	CA1	0.519876
0.103188	0.0742485	1	Derl1	Virgin_vs_E18	CA1	0.288016
0.22804	0.0741807	1	Ntm	Virgin_vs_E18	CA1	0.449281
0.262943	0.074144	1	Cd200r3	Virgin_vs_E18	CA1	0.486433
0.377671	0.0741438	1	Acad8	Virgin_vs_E18	CA1	0.591029
0.363361	0.0740963	1	Chst8	Virgin_vs_E18	CA1	0.579738
0.0169631	0.0740773	1	Wfs1	Virgin_vs_E18	CA1	0.0960178
0.338196	0.0739953	1	Lcmt1	Virgin_vs_E18	CA1	0.559947
0.150168	0.0739258	1	Bhmt2	Virgin_vs_E18	CA1	0.355244
0.0149893	0.0739093	1	Nt5c3	Virgin_vs_E18	CA1	0.0893337
0.538935	0.0737859	1	Ttc19	Virgin_vs_E18	CA1	0.715331
0.32197	0.0735877	1	Trove2	Virgin_vs_E18	CA1	0.546308
0.210512	0.0733351	1	Klhdc2	Virgin_vs_E18	CA1	0.431367
0.0060399	0.073313	1	Kcnn2	Virgin_vs_E18	CA1	0.0477948
0.307877	0.0732077	1	Atp6v0a2	Virgin_vs_E18	CA1	0.532223
0.283857	0.0731964	1	Phactr3	Virgin_vs_E18	CA1	0.509773
0.0130717	0.073152	1	Rp2	Virgin_vs_E18	CA1	0.0818688
0.221848	0.0731305	1	Gnptab	Virgin_vs_E18	CA1	0.443681
0.0920572	0.0731261	1	Dcun1d4	Virgin_vs_E18	CA1	0.26828
0.239299	0.0731068	1	Chchd7	Virgin_vs_E18	CA1	0.460858
0.124169	0.0730656	1	Ttl	Virgin_vs_E18	CA1	0.31902
0.176785	0.0730384	1	Ms4a4b	Virgin_vs_E18	CA1	0.389683
0.500446	0.0730369	1	Fbxl3	Virgin_vs_E18	CA1	0.683494
0.439411	0.0730256	1	Zmynd11	Virgin_vs_E18	CA1	0.63761
0.436016	0.0729809	1	Dtymk	Virgin_vs_E18	CA1	0.635196
0.0620929	0.072911	1	Rasa3	Virgin_vs_E18	CA1	0.210108
0.228398	0.0728217	1	Rprm	Virgin_vs_E18	CA1	0.449535
0.115186	0.0727951	1	Celf5	Virgin_vs_E18	CA1	0.304874
0.431666	0.0726187	1	Zbtb8os	Virgin_vs_E18	CA1	0.631814
0.258566	0.0725625	1	Dlk2	Virgin_vs_E18	CA1	0.48252
0.104442	0.0725128	1	Rbm5	Virgin_vs_E18	CA1	0.289864
0.2235	0.0724969	1	Desi2	Virgin_vs_E18	CA1	0.444932
0.100354	0.072435	1	Ccpg1	Virgin_vs_E18	CA1	0.283675
0.267231	0.0724283	1	Fam73a	Virgin_vs_E18	CA1	0.490865
0.277207	0.0724142	1	Rell2	Virgin_vs_E18	CA1	0.502699
0.353183	0.0723503	1	Zfp141	Virgin_vs_E18	CA1	0.570823
0.140219	0.0723411	1	Tmem35	Virgin_vs_E18	CA1	0.343067
0.32777	0.0723002	1	Ttyh3	Virgin_vs_E18	CA1	0.551852
0.285744	0.0722994	1	Pfkp	Virgin_vs_E18	CA1	0.510934
0.282468	0.07229	1	Gltscr1l	Virgin_vs_E18	CA1	0.508165
0.189515	0.0722618	1	Dcaf17	Virgin_vs_E18	CA1	0.405581
0.209073	0.0722569	1	Lmln	Virgin_vs_E18	CA1	0.429358
0.386961	0.0722563	1	Sppl2a	Virgin_vs_E18	CA1	0.598646
0.243203	0.072201	1	Adrb1	Virgin_vs_E18	CA1	0.464269
0.430081	0.0721531	1	Chkb	Virgin_vs_E18	CA1	0.630592
0.662252	0.0721515	1	B3galnt2	Virgin_vs_E18	CA1	0.799405
0.0869428	0.0721176	1	Nptn	Virgin_vs_E18	CA1	0.25968
0.309825	0.072083	1	Ankrd45	Virgin_vs_E18	CA1	0.534236
0.464232	0.0720765	1	Tbc1d19	Virgin_vs_E18	CA1	0.656933
0.137087	0.072058	1	Zfp292	Virgin_vs_E18	CA1	0.338586
0.267057	0.0720464	1	Commd4	Virgin_vs_E18	CA1	0.490865
0.214123	0.0719172	1	Cyp4x1	Virgin_vs_E18	CA1	0.43588
0.396406	0.0718096	1	Txndc17	Virgin_vs_E18	CA1	0.606153
0.423327	0.0718045	1	Dram2	Virgin_vs_E18	CA1	0.62521
0.0949733	0.0717358	1	Gabra2	Virgin_vs_E18	CA1	0.273391
0.461561	0.0716284	1	Pus7	Virgin_vs_E18	CA1	0.65582
0.486909	0.0715405	1	Eif2ak1	Virgin_vs_E18	CA1	0.672817
0.0562005	0.0714631	1	Tma16	Virgin_vs_E18	CA1	0.198481
0.352034	0.071403	1	Gnl2	Virgin_vs_E18	CA1	0.570021
0.0202617	0.0713877	1	Foxred1	Virgin_vs_E18	CA1	0.107061
0.358316	0.0713396	1	Glrb	Virgin_vs_E18	CA1	0.575282
0.341891	0.0713377	1	Adgrl3	Virgin_vs_E18	CA1	0.561793
0.040138	0.0712528	1	Osbpl9	Virgin_vs_E18	CA1	0.159789
0.636193	0.0711933	1	Specc1l	Virgin_vs_E18	CA1	0.782807
0.26479	0.0711669	1	Slfn9	Virgin_vs_E18	CA1	0.488391
0.117435	0.0709854	1	Slc16a1	Virgin_vs_E18	CA1	0.308793
0.290951	0.0709071	1	Sipa1l3	Virgin_vs_E18	CA1	0.516271
0.371524	0.0708515	1	Hdac2	Virgin_vs_E18	CA1	0.586716
0.222559	0.0707416	1	Rer1	Virgin_vs_E18	CA1	0.444071
0.356264	0.070628	1	Per2	Virgin_vs_E18	CA1	0.573179
0.260247	0.0705987	1	Adrbk2	Virgin_vs_E18	CA1	0.48388
0.554716	0.0705055	1	Ddost	Virgin_vs_E18	CA1	0.725303
0.0177329	0.0704967	1	Dnajb14	Virgin_vs_E18	CA1	0.09825
0.0523104	0.0704545	1	Fam177a	Virgin_vs_E18	CA1	0.190091
0.372686	0.0704524	1	Ctsd	Virgin_vs_E18	CA1	0.587534
0.126972	0.0704149	1	Osbpl6	Virgin_vs_E18	CA1	0.323397
0.362071	0.0703908	1	Lcorl	Virgin_vs_E18	CA1	0.579255
0.0421062	0.0702417	1	Camkk2	Virgin_vs_E18	CA1	0.16533
0.114173	0.070159	1	Mark3	Virgin_vs_E18	CA1	0.304375
0.335325	0.0700944	1	Zfp60	Virgin_vs_E18	CA1	0.558021
0.406022	0.0700446	1	Slain1	Virgin_vs_E18	CA1	0.613676
0.339884	0.0699947	1	Cacna1g	Virgin_vs_E18	CA1	0.560682
0.391715	0.0699838	1	Vamp3	Virgin_vs_E18	CA1	0.602268
0.228943	0.0698965	1	4933427I04Rik	Virgin_vs_E18	CA1	0.450154
0.117509	0.0698352	1	Lamp1	Virgin_vs_E18	CA1	0.308793
0.284756	0.0697279	1	Fbxl2	Virgin_vs_E18	CA1	0.509942
0.404562	0.0695922	1	Ubald1	Virgin_vs_E18	CA1	0.612672
0.556022	0.069565	1	Gabbr2	Virgin_vs_E18	CA1	0.725531
0.326179	0.0695586	1	Erc1	Virgin_vs_E18	CA1	0.550907
0.290992	0.0695408	1	Sec16a	Virgin_vs_E18	CA1	0.516271
0.319073	0.0694633	1	Slamf1	Virgin_vs_E18	CA1	0.543589
0.140286	0.0694457	1	Ppp1r16b	Virgin_vs_E18	CA1	0.343067
0.266438	0.0694288	1	Chchd10	Virgin_vs_E18	CA1	0.490188
0.165136	0.0694223	1	Dock3	Virgin_vs_E18	CA1	0.375984
0.00820545	0.0694038	1	Pea15a	Virgin_vs_E18	CA1	0.0595756
0.0284548	0.0693844	1	Ints8	Virgin_vs_E18	CA1	0.131146
0.0186561	0.069376	1	Cacnb3	Virgin_vs_E18	CA1	0.101475
0.485737	0.0692215	1	Parl	Virgin_vs_E18	CA1	0.672378
0.14268	0.0691965	1	Rpl28	Virgin_vs_E18	CA1	0.345853
0.292217	0.0691719	1	Lrrc4b	Virgin_vs_E18	CA1	0.517472
0.0424923	0.0690525	1	Rint1	Virgin_vs_E18	CA1	0.166598
0.327264	0.0689831	1	Tpst1	Virgin_vs_E18	CA1	0.55151
0.304155	0.0689219	1	Slc25a23	Virgin_vs_E18	CA1	0.529368
0.388992	0.0688717	1	Sorbs2	Virgin_vs_E18	CA1	0.600063
0.402734	0.0688136	1	Dnm3	Virgin_vs_E18	CA1	0.611924
0.603923	0.0687105	1	Spata7	Virgin_vs_E18	CA1	0.757771
0.174352	0.0685964	1	Txndc12	Virgin_vs_E18	CA1	0.38591
0.241556	0.0684221	1	Kmt5a	Virgin_vs_E18	CA1	0.462901
0.301322	0.0684049	1	Cox7a2	Virgin_vs_E18	CA1	0.526151
0.474657	0.0683551	1	Srsf2	Virgin_vs_E18	CA1	0.664791
0.0929761	0.0683322	1	Krba1	Virgin_vs_E18	CA1	0.269948
0.315418	0.0682821	1	Trafd1	Virgin_vs_E18	CA1	0.539864
0.349114	0.0682272	1	Satb2	Virgin_vs_E18	CA1	0.567793
0.238025	0.0682185	1	Cenpv	Virgin_vs_E18	CA1	0.459429
0.0424266	0.0681813	1	Phka2	Virgin_vs_E18	CA1	0.166451
0.101275	0.0681624	1	Fam69a	Virgin_vs_E18	CA1	0.285234
0.194113	0.0680897	1	Slc4a8	Virgin_vs_E18	CA1	0.410788
0.102287	0.0680821	1	Gpn1	Virgin_vs_E18	CA1	0.286588
0.50858	0.0680401	1	Kdm5c	Virgin_vs_E18	CA1	0.690434
0.314071	0.0680375	1	Shank3	Virgin_vs_E18	CA1	0.539127
0.525424	0.0679161	1	Mphosph8	Virgin_vs_E18	CA1	0.703948
0.194414	0.0677189	1	Rbm4b	Virgin_vs_E18	CA1	0.411125
0.467538	0.0676461	1	Taz	Virgin_vs_E18	CA1	0.6589
0.425137	0.0676437	1	Atg4c	Virgin_vs_E18	CA1	0.627096
0.413119	0.0676142	1	Mfsd4a	Virgin_vs_E18	CA1	0.618679
0.314771	0.0676126	1	Ssr1	Virgin_vs_E18	CA1	0.539542
0.215006	0.067606	1	Gm44904	Virgin_vs_E18	CA1	0.436911
0.317769	0.0674834	1	Ncam1	Virgin_vs_E18	CA1	0.542152
0.0680008	0.0674791	1	Dlg1	Virgin_vs_E18	CA1	0.221927
0.026266	0.0674657	1	Sdf4	Virgin_vs_E18	CA1	0.124875
0.220071	0.0673842	1	Nomo1	Virgin_vs_E18	CA1	0.442049
0.253918	0.0673513	1	Srsf7	Virgin_vs_E18	CA1	0.476481
0.230714	0.0673075	1	Alkbh1	Virgin_vs_E18	CA1	0.451951
0.369856	0.067263	1	Rprd1b	Virgin_vs_E18	CA1	0.58534
0.302962	0.0672193	1	Alkbh5	Virgin_vs_E18	CA1	0.527917
0.249826	0.0671884	1	Phf6	Virgin_vs_E18	CA1	0.471912
0.119918	0.0671636	1	Ubxn7	Virgin_vs_E18	CA1	0.312328
0.252309	0.0671515	1	Pcmtd1	Virgin_vs_E18	CA1	0.474466
0.0826434	0.0670101	1	Zfp638	Virgin_vs_E18	CA1	0.251696
0.346183	0.066946	1	Arf4	Virgin_vs_E18	CA1	0.565686
0.071804	0.066891	1	Med24	Virgin_vs_E18	CA1	0.229375
0.305724	0.066859	1	Yaf2	Virgin_vs_E18	CA1	0.530686
0.184677	0.0668546	1	F10	Virgin_vs_E18	CA1	0.398858
0.351694	0.066836	1	Ubap2l	Virgin_vs_E18	CA1	0.569911
0.0333908	0.0667463	1	Platr9	Virgin_vs_E18	CA1	0.142919
0.562712	0.0667292	1	Neurl1a	Virgin_vs_E18	CA1	0.731009
0.294874	0.0666737	1	Hnrnpm	Virgin_vs_E18	CA1	0.519227
0.12026	0.066657	1	Rtf1	Virgin_vs_E18	CA1	0.312665
0.324553	0.0666532	1	Clptm1	Virgin_vs_E18	CA1	0.549265
0.659568	0.0666464	1	Fam188a	Virgin_vs_E18	CA1	0.797803
0.812701	0.0666287	1	Ubtf	Virgin_vs_E18	CA1	0.891364
0.129418	0.0665754	1	Ikzf4	Virgin_vs_E18	CA1	0.327692
0.2991	0.0665466	1	Abcb4	Virgin_vs_E18	CA1	0.523047
0.193961	0.0665304	1	Imp4	Virgin_vs_E18	CA1	0.410613
0.417545	0.0664839	1	Nrp2	Virgin_vs_E18	CA1	0.621791
0.138102	0.0664036	1	Ddhd2	Virgin_vs_E18	CA1	0.340359
0.256786	0.0663503	1	Jmy	Virgin_vs_E18	CA1	0.480024
0.306703	0.0662512	1	Gpr137	Virgin_vs_E18	CA1	0.531379
0.246571	0.0661986	1	Ash1l	Virgin_vs_E18	CA1	0.46843
0.223951	0.0661465	1	Ergic2	Virgin_vs_E18	CA1	0.444951
0.111813	0.0661445	1	Prdm8	Virgin_vs_E18	CA1	0.300682
0.539535	0.0660666	1	Ap2a2	Virgin_vs_E18	CA1	0.715412
0.424982	0.0659987	1	Rbm27	Virgin_vs_E18	CA1	0.627025
0.174507	0.0658155	1	Nek1	Virgin_vs_E18	CA1	0.386068
0.0587129	0.0657589	1	Cyfip1	Virgin_vs_E18	CA1	0.203143
0.362317	0.0657502	1	Edem3	Virgin_vs_E18	CA1	0.579335
0.338937	0.0656637	1	Chmp2b	Virgin_vs_E18	CA1	0.560227
0.165729	0.0655815	1	Pdcd6	Virgin_vs_E18	CA1	0.376896
0.169636	0.0655159	1	Stim1	Virgin_vs_E18	CA1	0.381212
0.0868991	0.0652477	1	Kcnmb4	Virgin_vs_E18	CA1	0.25968
0.716579	0.0651801	1	Rims1	Virgin_vs_E18	CA1	0.835111
0.462633	0.0651757	1	Prkcz	Virgin_vs_E18	CA1	0.655836
0.298693	0.0651151	1	Pttg1ip	Virgin_vs_E18	CA1	0.52249
0.00974251	0.0649156	1	Bdp1	Virgin_vs_E18	CA1	0.0679664
0.0174683	0.0646842	1	Arcn1	Virgin_vs_E18	CA1	0.0974157
0.441114	0.0646117	1	Zfas1	Virgin_vs_E18	CA1	0.638806
0.807082	0.0645953	1	Ogfrl1	Virgin_vs_E18	CA1	0.888682
0.36276	0.0644541	1	Zmat4	Virgin_vs_E18	CA1	0.579569
0.554879	0.0644242	1	Dusp12	Virgin_vs_E18	CA1	0.725303
0.320448	0.0644024	1	Derl2	Virgin_vs_E18	CA1	0.544985
0.386003	0.064305	1	Fermt2	Virgin_vs_E18	CA1	0.598177
0.0626552	0.0642861	1	Tspan3	Virgin_vs_E18	CA1	0.211161
0.1843	0.0642414	1	Eif1ax	Virgin_vs_E18	CA1	0.398628
0.740338	0.0641879	1	Otud6b	Virgin_vs_E18	CA1	0.848796
0.109351	0.0641372	1	Ndufa2	Virgin_vs_E18	CA1	0.297607
0.515065	0.0640427	1	Mtif2	Virgin_vs_E18	CA1	0.695866
0.0954993	0.0640345	1	Tc2n	Virgin_vs_E18	CA1	0.274275
0.650244	0.0638776	1	Lsm6	Virgin_vs_E18	CA1	0.792541
0.177065	0.0638507	1	Taf15	Virgin_vs_E18	CA1	0.390007
0.701947	0.0638233	1	Pde12	Virgin_vs_E18	CA1	0.824682
0.537487	0.0637652	1	Adgrb1	Virgin_vs_E18	CA1	0.714298
0.564582	0.0637307	1	Max	Virgin_vs_E18	CA1	0.731774
0.202198	0.0636903	1	Mrpl51	Virgin_vs_E18	CA1	0.420632
0.410386	0.0636298	1	Ankrd10	Virgin_vs_E18	CA1	0.617101
0.112894	0.0635334	1	Slc26a2	Virgin_vs_E18	CA1	0.302289
0.188346	0.0635259	1	Ufsp2	Virgin_vs_E18	CA1	0.404256
0.362417	0.0635238	1	Skil	Virgin_vs_E18	CA1	0.579335
0.0113434	0.0634935	1	Nell1	Virgin_vs_E18	CA1	0.0748249
0.500408	0.063413	1	Phc3	Virgin_vs_E18	CA1	0.683494
0.447802	0.0632991	1	1110008P14Rik	Virgin_vs_E18	CA1	0.644682
0.860227	0.0632634	1	Dip2a	Virgin_vs_E18	CA1	0.919483
0.120942	0.0632237	1	Csmd1	Virgin_vs_E18	CA1	0.313561
0.696538	0.0632188	1	Mrps25	Virgin_vs_E18	CA1	0.821858
0.306801	0.0631203	1	Acvr2a	Virgin_vs_E18	CA1	0.531379
0.239752	0.0631033	1	Hacd2	Virgin_vs_E18	CA1	0.461044
0.474212	0.0630648	1	Ndufb2	Virgin_vs_E18	CA1	0.664326
0.336878	0.0629371	1	Ttc4	Virgin_vs_E18	CA1	0.559303
0.562302	0.0628774	1	Dctn6	Virgin_vs_E18	CA1	0.731003
0.333848	0.0628608	1	Invs	Virgin_vs_E18	CA1	0.556493
0.16276	0.0628604	1	Mapre1	Virgin_vs_E18	CA1	0.373321
0.196206	0.0627566	1	Ndufaf7	Virgin_vs_E18	CA1	0.41385
0.14935	0.06274	1	Fosl2	Virgin_vs_E18	CA1	0.354022
0.389056	0.0627064	1	Emc2	Virgin_vs_E18	CA1	0.600063
0.34861	0.0625651	1	Stxbp4	Virgin_vs_E18	CA1	0.567556
0.499683	0.0625479	1	Serp1	Virgin_vs_E18	CA1	0.683494
0.122359	0.062513	1	Frmd4a	Virgin_vs_E18	CA1	0.315888
0.354611	0.062459	1	Ctdsp2	Virgin_vs_E18	CA1	0.572145
0.171127	0.0624379	1	4732419C18Rik	Virgin_vs_E18	CA1	0.382093
0.0261365	0.062383	1	Eif5a2	Virgin_vs_E18	CA1	0.124681
0.0531781	0.0623731	1	Pcf11	Virgin_vs_E18	CA1	0.192219
0.422219	0.0623109	1	Sh3bp1	Virgin_vs_E18	CA1	0.624245
0.398852	0.0622866	1	Ptpra	Virgin_vs_E18	CA1	0.608627
0.670808	0.0622683	1	Rps6ka2	Virgin_vs_E18	CA1	0.804778
0.278826	0.0621877	1	Pi4ka	Virgin_vs_E18	CA1	0.503813
0.709783	0.0621189	1	Aagab	Virgin_vs_E18	CA1	0.830723
0.454057	0.0620355	1	Rnf114	Virgin_vs_E18	CA1	0.650343
0.00604342	0.0620339	1	Fam126b	Virgin_vs_E18	CA1	0.0477948
0.442603	0.0617902	1	Snx15	Virgin_vs_E18	CA1	0.640174
0.436788	0.0617769	1	Tmem9	Virgin_vs_E18	CA1	0.635358
0.360361	0.0617562	1	Matk	Virgin_vs_E18	CA1	0.577461
0.174943	0.0617517	1	Rcor3	Virgin_vs_E18	CA1	0.386636
0.241474	0.06175	1	0610030E20Rik	Virgin_vs_E18	CA1	0.462901
0.561965	0.0616063	1	Fnbp4	Virgin_vs_E18	CA1	0.731003
0.253484	0.0614916	1	Pxdn	Virgin_vs_E18	CA1	0.476274
0.484959	0.061445	1	Zfp12	Virgin_vs_E18	CA1	0.672099
0.202729	0.0614373	1	Tmed5	Virgin_vs_E18	CA1	0.420843
0.447705	0.0613575	1	Icmt	Virgin_vs_E18	CA1	0.644682
0.638829	0.0612047	1	Tada1	Virgin_vs_E18	CA1	0.784813
0.364593	0.061172	1	Clk3	Virgin_vs_E18	CA1	0.580566
0.408521	0.0610298	1	Wdr13	Virgin_vs_E18	CA1	0.616059
0.43579	0.0610068	1	Tbl1x	Virgin_vs_E18	CA1	0.635196
0.0704357	0.0610001	1	Arl5a	Virgin_vs_E18	CA1	0.226977
0.44866	0.0609997	1	Mdm4	Virgin_vs_E18	CA1	0.645601
0.247307	0.0609679	1	Ash2l	Virgin_vs_E18	CA1	0.469081
0.0783373	0.0609355	1	Ube2j1	Virgin_vs_E18	CA1	0.242858
0.000482681	0.0609336	1	Cul4a	Virgin_vs_E18	CA1	0.00721247
0.231019	0.0609312	1	Magt1	Virgin_vs_E18	CA1	0.452029
0.0167865	0.0609236	1	Fpgt	Virgin_vs_E18	CA1	0.0956927
0.331448	0.0608342	1	Sntg1	Virgin_vs_E18	CA1	0.554551
0.555198	0.0607248	1	Vps37a	Virgin_vs_E18	CA1	0.725303
0.592716	0.060719	1	Fam120a	Virgin_vs_E18	CA1	0.750595
0.48732	0.0607021	1	Tgfbr3	Virgin_vs_E18	CA1	0.67297
0.534838	0.0606808	1	Gpx4	Virgin_vs_E18	CA1	0.711464
0.417338	0.0606592	1	Gipc2	Virgin_vs_E18	CA1	0.621672
0.354997	0.060641	1	Gpr107	Virgin_vs_E18	CA1	0.572296
0.322934	0.060635	1	Timm17b	Virgin_vs_E18	CA1	0.547313
0.265321	0.0605616	1	Tbp	Virgin_vs_E18	CA1	0.488899
0.198486	0.0605051	1	Arsb	Virgin_vs_E18	CA1	0.415855
0.744876	0.060501	1	Atr	Virgin_vs_E18	CA1	0.851763
0.212473	0.0604247	1	Med1	Virgin_vs_E18	CA1	0.433422
0.0525079	0.0603881	1	A130010J15Rik	Virgin_vs_E18	CA1	0.190382
0.120662	0.0603125	1	Gm10125	Virgin_vs_E18	CA1	0.313243
0.658575	0.0602732	1	Poglut1	Virgin_vs_E18	CA1	0.797417
0.521994	0.0602156	1	Trpc1	Virgin_vs_E18	CA1	0.700878
0.409965	0.0601707	1	Shprh	Virgin_vs_E18	CA1	0.617101
0.231357	0.0600991	1	Cfap20	Virgin_vs_E18	CA1	0.452029
0.382016	0.0599942	1	Tmem181a	Virgin_vs_E18	CA1	0.593877
0.622452	0.0599155	1	Tox	Virgin_vs_E18	CA1	0.771615
0.234753	0.0599044	1	Capns1	Virgin_vs_E18	CA1	0.456239
0.539274	0.059883	1	Cpt1c	Virgin_vs_E18	CA1	0.715412
0.548095	0.0598272	1	Cdk16	Virgin_vs_E18	CA1	0.721681
0.223493	0.0598157	1	Sgce	Virgin_vs_E18	CA1	0.444932
0.553956	0.0597739	1	Ppp2cb	Virgin_vs_E18	CA1	0.725086
0.190689	0.0596736	1	Tex2	Virgin_vs_E18	CA1	0.406613
0.4387	0.0596121	1	Isca2	Virgin_vs_E18	CA1	0.637351
0.655946	0.0596094	1	Erlin1	Virgin_vs_E18	CA1	0.795878
0.433482	0.0595953	1	Lrrc47	Virgin_vs_E18	CA1	0.633368
0.581763	0.0595898	1	Stard3nl	Virgin_vs_E18	CA1	0.743493
0.197013	0.0595336	1	Wtap	Virgin_vs_E18	CA1	0.414686
0.598429	0.0594962	1	Tusc3	Virgin_vs_E18	CA1	0.754903
0.187506	0.0594614	1	Lrrc8c	Virgin_vs_E18	CA1	0.403187
0.519302	0.0593358	1	Smad3	Virgin_vs_E18	CA1	0.69854
0.277937	0.0593074	1	Pola1	Virgin_vs_E18	CA1	0.502938
0.117918	0.0593068	1	Crebrf	Virgin_vs_E18	CA1	0.309327
0.232304	0.0592397	1	Zcchc9	Virgin_vs_E18	CA1	0.452917
0.50041	0.0591769	1	Lcor	Virgin_vs_E18	CA1	0.683494
0.511162	0.0591564	1	Bzrap1	Virgin_vs_E18	CA1	0.692773
0.519986	0.0591145	1	Sos1	Virgin_vs_E18	CA1	0.699139
0.0438131	0.0590718	1	Cldn12	Virgin_vs_E18	CA1	0.17031
0.18125	0.0590366	1	Hsbp1	Virgin_vs_E18	CA1	0.394059
0.129487	0.05878	1	Chrm1	Virgin_vs_E18	CA1	0.327692
0.482972	0.0587248	1	Plekhb2	Virgin_vs_E18	CA1	0.670687
0.539688	0.0587205	1	Crtc3	Virgin_vs_E18	CA1	0.715412
0.379832	0.058702	1	Rpl7l1	Virgin_vs_E18	CA1	0.592203
0.404524	0.0586948	1	Srsf1	Virgin_vs_E18	CA1	0.612672
0.517026	0.0586083	1	Acp6	Virgin_vs_E18	CA1	0.697132
0.144492	0.0585734	1	Mrpl3	Virgin_vs_E18	CA1	0.348118
0.478154	0.0585309	1	Ccdc127	Virgin_vs_E18	CA1	0.667938
0.277568	0.0585103	1	Myo18a	Virgin_vs_E18	CA1	0.502938
0.757148	0.0584292	1	Usp8	Virgin_vs_E18	CA1	0.860941
0.338889	0.0584007	1	Uqcrq	Virgin_vs_E18	CA1	0.560227
0.142929	0.0583831	1	Actr1b	Virgin_vs_E18	CA1	0.345862
0.599878	0.0583372	1	Msh3	Virgin_vs_E18	CA1	0.755488
0.366266	0.0583291	1	Nrg3	Virgin_vs_E18	CA1	0.582322
0.410319	0.0583254	1	Sel1l3	Virgin_vs_E18	CA1	0.617101
0.635189	0.0582725	1	Slc11a2	Virgin_vs_E18	CA1	0.782477
0.455349	0.0582137	1	Nceh1	Virgin_vs_E18	CA1	0.6513
0.0243552	0.0581689	1	Ids	Virgin_vs_E18	CA1	0.11976
0.625644	0.0580616	1	Zfp62	Virgin_vs_E18	CA1	0.773961
0.214916	0.0580301	1	Tnrc6c	Virgin_vs_E18	CA1	0.436889
0.14293	0.058016	1	Psmb7	Virgin_vs_E18	CA1	0.345862
0.357473	0.0580105	1	Sec24b	Virgin_vs_E18	CA1	0.574455
0.179307	0.0578614	1	Mef2a	Virgin_vs_E18	CA1	0.391428
0.106234	0.0578431	1	Pcdh9	Virgin_vs_E18	CA1	0.292541
0.427717	0.0577512	1	Ppp4c	Virgin_vs_E18	CA1	0.628973
0.0421125	0.0577327	1	Nlgn1	Virgin_vs_E18	CA1	0.16533
0.296271	0.0577209	1	Lman1	Virgin_vs_E18	CA1	0.520403
0.25468	0.0577045	1	2900055J20Rik	Virgin_vs_E18	CA1	0.477252
0.0776051	0.0576941	1	Gsk3a	Virgin_vs_E18	CA1	0.241351
0.594796	0.0575455	1	Dnajc21	Virgin_vs_E18	CA1	0.752257
0.283739	0.0575156	1	Pqbp1	Virgin_vs_E18	CA1	0.509773
0.45471	0.0574891	1	Vipas39	Virgin_vs_E18	CA1	0.650961
0.131686	0.057468	1	Hspa14	Virgin_vs_E18	CA1	0.330817
0.351834	0.0574285	1	Amer2	Virgin_vs_E18	CA1	0.569911
0.00833165	0.0574139	1	Pitrm1	Virgin_vs_E18	CA1	0.0601208
0.349072	0.0572873	1	Slc7a8	Virgin_vs_E18	CA1	0.567793
0.272583	0.0572261	1	Zfp426	Virgin_vs_E18	CA1	0.497381
0.0745374	0.0571293	1	Nfasc	Virgin_vs_E18	CA1	0.234791
0.679252	0.0570845	1	Acin1	Virgin_vs_E18	CA1	0.810449
0.275609	0.0570678	1	Sfpq	Virgin_vs_E18	CA1	0.501038
0.14445	0.0570078	1	Arid1a	Virgin_vs_E18	CA1	0.348118
0.21142	0.0570003	1	Aldh7a1	Virgin_vs_E18	CA1	0.432174
0.112095	0.0569867	1	Rmnd5b	Virgin_vs_E18	CA1	0.301259
0.415058	0.0569369	1	Gm42488	Virgin_vs_E18	CA1	0.620877
0.396889	0.0569284	1	Vimp	Virgin_vs_E18	CA1	0.606668
0.381287	0.0567663	1	Orc4	Virgin_vs_E18	CA1	0.593345
0.0488448	0.0567404	1	Mapk8ip1	Virgin_vs_E18	CA1	0.182154
0.379447	0.0567312	1	Apopt1	Virgin_vs_E18	CA1	0.592144
0.50726	0.0567147	1	Atpaf1	Virgin_vs_E18	CA1	0.689601
0.195687	0.0566948	1	Mlec	Virgin_vs_E18	CA1	0.413226
0.418049	0.0566737	1	Txndc5	Virgin_vs_E18	CA1	0.621945
0.247681	0.0566286	1	Hdac5	Virgin_vs_E18	CA1	0.469238
0.731361	0.0564732	1	Cdk13	Virgin_vs_E18	CA1	0.843359
0.868978	0.0563992	1	Syt14	Virgin_vs_E18	CA1	0.92564
0.439849	0.0563696	1	Stradb	Virgin_vs_E18	CA1	0.637768
0.284725	0.0563601	1	Vmp1	Virgin_vs_E18	CA1	0.509942
0.275535	0.0562681	1	Efcab14	Virgin_vs_E18	CA1	0.501038
0.477353	0.0561174	1	Fgf9	Virgin_vs_E18	CA1	0.667137
0.272755	0.0560154	1	Pak3	Virgin_vs_E18	CA1	0.497542
0.351024	0.0559884	1	Apol6	Virgin_vs_E18	CA1	0.569324
0.417211	0.0559331	1	Ubr1	Virgin_vs_E18	CA1	0.621672
0.448151	0.055911	1	Abhd3	Virgin_vs_E18	CA1	0.645026
0.276921	0.0558944	1	Lemd3	Virgin_vs_E18	CA1	0.502625
0.24806	0.0558559	1	Tmem67	Virgin_vs_E18	CA1	0.469534
0.0433136	0.0557646	1	Pfkfb2	Virgin_vs_E18	CA1	0.169367
0.246089	0.0556289	1	Nckipsd	Virgin_vs_E18	CA1	0.468062
0.455783	0.0555512	1	Ildr2	Virgin_vs_E18	CA1	0.651705
0.346474	0.0555115	1	Ercc4	Virgin_vs_E18	CA1	0.56569
0.565565	0.0554816	1	Cntn2	Virgin_vs_E18	CA1	0.731973
0.139868	0.0553643	1	Clasp2	Virgin_vs_E18	CA1	0.342591
0.316058	0.0553618	1	Hid1	Virgin_vs_E18	CA1	0.540411
0.418716	0.0552856	1	Stx1b	Virgin_vs_E18	CA1	0.622007
0.121743	0.0551298	1	Erp29	Virgin_vs_E18	CA1	0.314906
0.626961	0.0550683	1	Snrnp48	Virgin_vs_E18	CA1	0.775102
0.0706502	0.0550475	1	Ubn2	Virgin_vs_E18	CA1	0.227147
0.439396	0.0549865	1	Mynn	Virgin_vs_E18	CA1	0.63761
0.215227	0.0549521	1	Smap1	Virgin_vs_E18	CA1	0.436911
0.354188	0.0549361	1	Spire1	Virgin_vs_E18	CA1	0.571932
0.467433	0.0548677	1	1810030O07Rik	Virgin_vs_E18	CA1	0.6589
0.451977	0.0548197	1	Fam189b	Virgin_vs_E18	CA1	0.648311
0.258812	0.0548101	1	Fndc3a	Virgin_vs_E18	CA1	0.482738
0.122339	0.0548091	1	Zfp157	Virgin_vs_E18	CA1	0.315888
0.0586452	0.054771	1	Zfp942	Virgin_vs_E18	CA1	0.203143
0.417945	0.0547275	1	Cabp1	Virgin_vs_E18	CA1	0.621945
0.466398	0.054602	1	Fam69b	Virgin_vs_E18	CA1	0.658548
0.0877204	0.0544226	1	Gpat4	Virgin_vs_E18	CA1	0.261472
0.350773	0.0543373	1	Slc25a33	Virgin_vs_E18	CA1	0.569075
0.307842	0.0543302	1	Vps4a	Virgin_vs_E18	CA1	0.532223
0.49898	0.05428	1	Gosr2	Virgin_vs_E18	CA1	0.683202
0.136193	0.0540556	1	Nr1d2	Virgin_vs_E18	CA1	0.336958
0.265124	0.0540431	1	Sppl3	Virgin_vs_E18	CA1	0.488776
0.468598	0.053965	1	Rnf20	Virgin_vs_E18	CA1	0.659704
0.367811	0.0539229	1	Tkt	Virgin_vs_E18	CA1	0.583264
0.565881	0.0538828	1	Brd7	Virgin_vs_E18	CA1	0.732181
0.231888	0.0538727	1	Gdap2	Virgin_vs_E18	CA1	0.452503
0.285921	0.0537732	1	Slc23a2	Virgin_vs_E18	CA1	0.511095
0.403482	0.0537334	1	Pnck	Virgin_vs_E18	CA1	0.612198
0.447578	0.0537188	1	Ccdc34	Virgin_vs_E18	CA1	0.644674
0.302525	0.0537174	1	Abca3	Virgin_vs_E18	CA1	0.527312
0.18439	0.0536912	1	Gatm	Virgin_vs_E18	CA1	0.398675
0.503778	0.053514	1	Setd5	Virgin_vs_E18	CA1	0.686687
0.852666	0.0534426	1	Cs	Virgin_vs_E18	CA1	0.914618
0.0436455	0.0534263	1	Fut9	Virgin_vs_E18	CA1	0.170099
0.701631	0.0533359	1	Armc9	Virgin_vs_E18	CA1	0.824682
0.416744	0.0532506	1	Arhgef18	Virgin_vs_E18	CA1	0.621484
0.570728	0.0532253	1	Dalrd3	Virgin_vs_E18	CA1	0.735257
0.145342	0.0532041	1	Klhdc3	Virgin_vs_E18	CA1	0.349308
0.068189	0.0531546	1	Gm26562	Virgin_vs_E18	CA1	0.222172
0.403062	0.0531389	1	Atp6v0a1	Virgin_vs_E18	CA1	0.612034
0.218293	0.0530715	1	Lin7c	Virgin_vs_E18	CA1	0.440102
0.190693	0.0530404	1	Lrtm2	Virgin_vs_E18	CA1	0.406613
0.10189	0.0530248	1	Vegfa	Virgin_vs_E18	CA1	0.285885
0.519834	0.0529328	1	Tma7	Virgin_vs_E18	CA1	0.699095
0.738293	0.0528761	1	Xrn2	Virgin_vs_E18	CA1	0.848321
0.401694	0.0527404	1	Casc4	Virgin_vs_E18	CA1	0.611807
0.418694	0.0527199	1	Gm10827	Virgin_vs_E18	CA1	0.622007
0.708735	0.0527008	1	Mbd1	Virgin_vs_E18	CA1	0.829962
0.324174	0.0526663	1	Cx3cl1	Virgin_vs_E18	CA1	0.54894
0.510799	0.0525731	1	Qars	Virgin_vs_E18	CA1	0.692487
0.0865492	0.0525505	1	Cadm1	Virgin_vs_E18	CA1	0.259031
0.562956	0.052437	1	Zfp207	Virgin_vs_E18	CA1	0.731009
0.231326	0.0524306	1	Lrpprc	Virgin_vs_E18	CA1	0.452029
0.286936	0.0523937	1	Emc6	Virgin_vs_E18	CA1	0.512287
0.143657	0.0523904	1	Dcun1d2	Virgin_vs_E18	CA1	0.34696
0.668064	0.0522877	1	Tmem161b	Virgin_vs_E18	CA1	0.803119
0.354891	0.052278	1	Gpatch2	Virgin_vs_E18	CA1	0.572296
0.594767	0.0522441	1	Capn7	Virgin_vs_E18	CA1	0.752257
0.373211	0.052208	1	Zfp952	Virgin_vs_E18	CA1	0.58773
0.441392	0.0521907	1	Gtf3c4	Virgin_vs_E18	CA1	0.639051
0.595881	0.0520663	1	Nudt21	Virgin_vs_E18	CA1	0.752819
0.0369057	0.052011	1	2010109I03Rik	Virgin_vs_E18	CA1	0.152036
0.621129	0.0519642	1	Ergic3	Virgin_vs_E18	CA1	0.770645
0.169218	0.0519479	1	Nav3	Virgin_vs_E18	CA1	0.380708
0.197228	0.0519276	1	Cachd1	Virgin_vs_E18	CA1	0.41499
0.520319	0.0519159	1	Uqcc1	Virgin_vs_E18	CA1	0.699427
0.378603	0.0516544	1	Rpl35a	Virgin_vs_E18	CA1	0.591976
0.292697	0.0515671	1	Rps28	Virgin_vs_E18	CA1	0.517855
0.445228	0.0514106	1	Pcmtd2	Virgin_vs_E18	CA1	0.643022
0.372168	0.0513784	1	Cep170	Virgin_vs_E18	CA1	0.587305
0.397462	0.0513245	1	Mib1	Virgin_vs_E18	CA1	0.607136
0.341138	0.0513221	1	Dazap2	Virgin_vs_E18	CA1	0.561027
0.40977	0.0512216	1	Aqr	Virgin_vs_E18	CA1	0.617101
0.126554	0.0511755	1	Clstn1	Virgin_vs_E18	CA1	0.32275
0.41549	0.0511181	1	Galnt13	Virgin_vs_E18	CA1	0.620877
0.476514	0.0510987	1	BC023829	Virgin_vs_E18	CA1	0.666598
0.341477	0.0510866	1	Ephb2	Virgin_vs_E18	CA1	0.561355
0.842663	0.0510771	1	Kbtbd2	Virgin_vs_E18	CA1	0.909021
0.499787	0.0510586	1	Cdkn2d	Virgin_vs_E18	CA1	0.683494
0.543397	0.0509791	1	Mtfp1	Virgin_vs_E18	CA1	0.717978
0.316168	0.0509184	1	Zfp704	Virgin_vs_E18	CA1	0.540411
0.202899	0.0508747	1	Olfm1	Virgin_vs_E18	CA1	0.421049
0.0845247	0.0507925	1	Pdxk	Virgin_vs_E18	CA1	0.255442
0.522545	0.0507779	1	Churc1	Virgin_vs_E18	CA1	0.701298
0.601509	0.0506862	1	Mxi1	Virgin_vs_E18	CA1	0.756355
0.516933	0.0506703	1	Kcna1	Virgin_vs_E18	CA1	0.697132
0.803451	0.0505977	1	Cryzl1	Virgin_vs_E18	CA1	0.887128
0.228921	0.0505056	1	Ccdc59	Virgin_vs_E18	CA1	0.450154
0.151049	0.0505049	1	Slc22a15	Virgin_vs_E18	CA1	0.356183
0.254747	0.050466	1	Gm14296	Virgin_vs_E18	CA1	0.477252
0.0316003	0.0504635	1	BC030336	Virgin_vs_E18	CA1	0.138999
0.738025	0.0504568	1	Immt	Virgin_vs_E18	CA1	0.848321
0.399317	0.0503809	1	Usp19	Virgin_vs_E18	CA1	0.609178
0.598822	0.0503729	1	Tsga10	Virgin_vs_E18	CA1	0.75491
0.774357	0.0503152	1	Chmp1a	Virgin_vs_E18	CA1	0.873391
0.0786537	0.0502907	1	Srcin1	Virgin_vs_E18	CA1	0.243582
0.388659	0.0501661	1	Tial1	Virgin_vs_E18	CA1	0.599848
0.415641	0.0501025	1	Tnfrsf19	Virgin_vs_E18	CA1	0.620877
0.48536	0.0500958	1	Gm19331	Virgin_vs_E18	CA1	0.672099
0.221919	0.0500944	1	Smc1a	Virgin_vs_E18	CA1	0.443681
0.527059	0.050086	1	Mettl3	Virgin_vs_E18	CA1	0.705264
0.137441	0.0500399	1	Polr3k	Virgin_vs_E18	CA1	0.339189
0.410261	0.049921	1	Ubr2	Virgin_vs_E18	CA1	0.617101
0.126428	0.0498819	1	Oaz1	Virgin_vs_E18	CA1	0.32264
0.424589	0.0498683	1	Uspl1	Virgin_vs_E18	CA1	0.626601
0.386434	0.0498601	1	Esyt2	Virgin_vs_E18	CA1	0.598373
0.332563	0.049836	1	Rab14	Virgin_vs_E18	CA1	0.556099
0.383469	0.0497667	1	Cfap74	Virgin_vs_E18	CA1	0.59582
0.472028	0.0496358	1	Mycbp2	Virgin_vs_E18	CA1	0.662371
0.291224	0.0496334	1	Glt8d1	Virgin_vs_E18	CA1	0.516271
0.538671	0.0496136	1	Tbce	Virgin_vs_E18	CA1	0.715331
0.418726	0.0495416	1	Dnajc11	Virgin_vs_E18	CA1	0.622007
0.330029	0.0494147	1	Snx16	Virgin_vs_E18	CA1	0.553349
0.147229	0.0493884	1	Tmem106b	Virgin_vs_E18	CA1	0.351376
0.431432	0.0493817	1	Taf6	Virgin_vs_E18	CA1	0.631629
0.0450537	0.0493401	1	Ralbp1	Virgin_vs_E18	CA1	0.173364
0.14043	0.0493161	1	Smyd4	Virgin_vs_E18	CA1	0.343067
0.725437	0.0492247	1	Nudt3	Virgin_vs_E18	CA1	0.840152
0.339699	0.0491159	1	Patl1	Virgin_vs_E18	CA1	0.560603
0.0889643	0.0490617	1	4833439L19Rik	Virgin_vs_E18	CA1	0.263179
0.32217	0.0490585	1	Syvn1	Virgin_vs_E18	CA1	0.546333
0.0339151	0.0490503	1	Slc38a6	Virgin_vs_E18	CA1	0.144219
0.287513	0.0490387	1	Gm15535	Virgin_vs_E18	CA1	0.512773
0.3387	0.0490343	1	Psmd11	Virgin_vs_E18	CA1	0.560151
0.349325	0.0490008	1	Ilf2	Virgin_vs_E18	CA1	0.567828
0.193201	0.0489793	1	Tmpo	Virgin_vs_E18	CA1	0.409851
0.353597	0.0489466	1	Mpv17l	Virgin_vs_E18	CA1	0.571293
0.365774	0.0488772	1	Iqcb1	Virgin_vs_E18	CA1	0.581698
0.46821	0.0488037	1	Mtf2	Virgin_vs_E18	CA1	0.659531
0.057155	0.0487929	1	Csnk1g1	Virgin_vs_E18	CA1	0.200314
0.577115	0.0487717	1	Tmem8b	Virgin_vs_E18	CA1	0.740727
0.576482	0.0487364	1	Trub1	Virgin_vs_E18	CA1	0.740238
0.392038	0.0486897	1	Lmna	Virgin_vs_E18	CA1	0.602422
0.2178	0.0486415	1	Slk	Virgin_vs_E18	CA1	0.439664
0.362993	0.0486362	1	Trim39	Virgin_vs_E18	CA1	0.579738
0.796496	0.0486235	1	Atp8b2	Virgin_vs_E18	CA1	0.883614
0.598918	0.0486189	1	Rabif	Virgin_vs_E18	CA1	0.75491
0.637708	0.0485436	1	Irgq	Virgin_vs_E18	CA1	0.784102
0.250283	0.0485066	1	Ly6h	Virgin_vs_E18	CA1	0.472372
0.447476	0.0484723	1	Pkp2	Virgin_vs_E18	CA1	0.644674
0.582362	0.0483613	1	Ipo8	Virgin_vs_E18	CA1	0.743493
0.801671	0.0483094	1	Coa3	Virgin_vs_E18	CA1	0.886997
0.486868	0.0482371	1	Jam3	Virgin_vs_E18	CA1	0.672817
0.272306	0.0481824	1	Atg3	Virgin_vs_E18	CA1	0.497146
0.582964	0.0481659	1	Pik3ip1	Virgin_vs_E18	CA1	0.743529
0.54214	0.0479329	1	Zfp938	Virgin_vs_E18	CA1	0.716799
0.730471	0.0479038	1	Lekr1	Virgin_vs_E18	CA1	0.842929
0.039778	0.0476546	1	Kcnv1	Virgin_vs_E18	CA1	0.158946
0.595799	0.0476288	1	Emsy	Virgin_vs_E18	CA1	0.752819
0.389847	0.0475926	1	Kdm6a	Virgin_vs_E18	CA1	0.600653
0.41965	0.0475322	1	Itfg1	Virgin_vs_E18	CA1	0.622594
0.315245	0.0475189	1	Sirt2	Virgin_vs_E18	CA1	0.539864
0.164484	0.0475172	1	Topbp1	Virgin_vs_E18	CA1	0.375371
0.235616	0.0474599	1	Thoc1	Virgin_vs_E18	CA1	0.456709
0.701319	0.0474323	1	Hivep3	Virgin_vs_E18	CA1	0.824682
0.630408	0.0473748	1	Cds2	Virgin_vs_E18	CA1	0.778275
0.493786	0.0472423	1	Hs6st1	Virgin_vs_E18	CA1	0.679129
0.618201	0.047146	1	Trappc10	Virgin_vs_E18	CA1	0.768881
0.678227	0.0471034	1	Ptcd3	Virgin_vs_E18	CA1	0.810044
0.777323	0.0471027	1	Socs7	Virgin_vs_E18	CA1	0.875079
0.0644619	0.0470771	1	Elk1	Virgin_vs_E18	CA1	0.214666
0.704927	0.0470736	1	Rph3a	Virgin_vs_E18	CA1	0.827646
0.790472	0.0470334	1	Atp11b	Virgin_vs_E18	CA1	0.88063
0.909656	0.046995	1	Nadk	Virgin_vs_E18	CA1	0.947015
0.46189	0.0469536	1	Hook3	Virgin_vs_E18	CA1	0.655836
0.435054	0.0469321	1	Iars	Virgin_vs_E18	CA1	0.634719
0.570243	0.0468504	1	Haus2	Virgin_vs_E18	CA1	0.735116
0.500042	0.0468356	1	Tbc1d30	Virgin_vs_E18	CA1	0.683494
0.224092	0.046831	1	1810037I17Rik	Virgin_vs_E18	CA1	0.444953
0.0177916	0.0467927	1	Smarca4	Virgin_vs_E18	CA1	0.0983571
0.0469433	0.0467403	1	Armcx5	Virgin_vs_E18	CA1	0.177654
0.105398	0.0466903	1	Cyp51	Virgin_vs_E18	CA1	0.291418
0.123798	0.0466146	1	Rps26	Virgin_vs_E18	CA1	0.318345
0.298113	0.0465931	1	Kcnb1	Virgin_vs_E18	CA1	0.521787
0.579446	0.0465619	1	Gap43	Virgin_vs_E18	CA1	0.741616
0.720906	0.0464926	1	Rabggtb	Virgin_vs_E18	CA1	0.837655
0.110177	0.0464674	1	Gm29455	Virgin_vs_E18	CA1	0.29854
0.361262	0.0463993	1	Gbf1	Virgin_vs_E18	CA1	0.578395
0.410804	0.0463295	1	Ccdc115	Virgin_vs_E18	CA1	0.617499
0.0417725	0.046329	1	Trim46	Virgin_vs_E18	CA1	0.164387
0.511369	0.0463262	1	Mturn	Virgin_vs_E18	CA1	0.692773
0.43611	0.0463002	1	Ankib1	Virgin_vs_E18	CA1	0.635196
0.508096	0.0462487	1	Sdk2	Virgin_vs_E18	CA1	0.690096
0.537764	0.0462007	1	Cebpg	Virgin_vs_E18	CA1	0.714387
0.328285	0.0461897	1	Urgcp	Virgin_vs_E18	CA1	0.552091
0.532335	0.0461723	1	Tspyl2	Virgin_vs_E18	CA1	0.7099
0.403449	0.0461291	1	Stx16	Virgin_vs_E18	CA1	0.612198
0.122924	0.0460818	1	Eri3	Virgin_vs_E18	CA1	0.316791
0.671109	0.0459923	1	Dnajb4	Virgin_vs_E18	CA1	0.804835
0.653506	0.0459503	1	Zzef1	Virgin_vs_E18	CA1	0.794815
0.479136	0.0459279	1	Nedd4l	Virgin_vs_E18	CA1	0.66819
0.550191	0.0458726	1	Rbbp5	Virgin_vs_E18	CA1	0.722733
0.486827	0.0458338	1	Osbpl1a	Virgin_vs_E18	CA1	0.672817
0.340734	0.0458244	1	Cask	Virgin_vs_E18	CA1	0.56091
0.216601	0.0457059	1	Rgs7bp	Virgin_vs_E18	CA1	0.438487
0.285184	0.0455672	1	Tpm1	Virgin_vs_E18	CA1	0.510243
0.308883	0.0455561	1	Dgkg	Virgin_vs_E18	CA1	0.533179
0.983815	0.0454259	1	Tmf1	Virgin_vs_E18	CA1	0.990213
0.613375	0.0454145	1	Plxnc1	Virgin_vs_E18	CA1	0.765384
0.58194	0.0453996	1	Vps33a	Virgin_vs_E18	CA1	0.743493
0.392833	0.0452587	1	Ift57	Virgin_vs_E18	CA1	0.603041
0.315005	0.0452434	1	Cmtm4	Virgin_vs_E18	CA1	0.539628
0.266474	0.0451475	1	Vmn1r58	Virgin_vs_E18	CA1	0.490188
0.401693	0.0450361	1	Plpp1	Virgin_vs_E18	CA1	0.611807
0.328504	0.0450104	1	Crip2	Virgin_vs_E18	CA1	0.552296
0.179284	0.0449595	1	D630045J12Rik	Virgin_vs_E18	CA1	0.391428
0.594115	0.0449265	1	Tsc2	Virgin_vs_E18	CA1	0.751719
0.137864	0.044756	1	Atp6v0c	Virgin_vs_E18	CA1	0.339949
0.26071	0.0446782	1	Plk4	Virgin_vs_E18	CA1	0.484282
0.358725	0.0444881	1	Ybx1	Virgin_vs_E18	CA1	0.575624
0.124748	0.0444447	1	Qsox2	Virgin_vs_E18	CA1	0.320088
0.823963	0.0443798	1	Xiap	Virgin_vs_E18	CA1	0.897856
0.101588	0.0443414	1	Suco	Virgin_vs_E18	CA1	0.285446
0.497522	0.044247	1	Smarca1	Virgin_vs_E18	CA1	0.682193
0.686209	0.0442233	1	Chrnb2	Virgin_vs_E18	CA1	0.81412
0.716246	0.0442052	1	Arhgap26	Virgin_vs_E18	CA1	0.835046
0.565354	0.0441682	1	Agbl3	Virgin_vs_E18	CA1	0.731973
0.0241874	0.0440888	1	Ralgps2	Virgin_vs_E18	CA1	0.119117
0.66826	0.0440707	1	Slc1a4	Virgin_vs_E18	CA1	0.803119
0.333595	0.0439952	1	Rnf182	Virgin_vs_E18	CA1	0.556244
0.478769	0.0439379	1	Mrps18c	Virgin_vs_E18	CA1	0.667998
0.497842	0.0439223	1	Usp33	Virgin_vs_E18	CA1	0.682314
0.528215	0.0438867	1	Ahsa1	Virgin_vs_E18	CA1	0.706328
0.139179	0.0438599	1	Mterf3	Virgin_vs_E18	CA1	0.341473
0.649401	0.0437919	1	Cox18	Virgin_vs_E18	CA1	0.79208
0.315699	0.0437576	1	Tubgcp5	Virgin_vs_E18	CA1	0.540031
0.376269	0.0436776	1	Akt3	Virgin_vs_E18	CA1	0.589776
[truncated: 3,882 more rows]

## Sheet: CA1 VvsPP
p_val	avg_log2FC	p_val_adj	gene	comparison	celltype	fdr
6.77228e-284	2.53673	1.60842e-279	Ttr	Virgin_vs_PP	CA1	3.97939e-280
5.4119e-135	1.71368	1.28533e-130	Enpp2	Virgin_vs_PP	CA1	1.59002e-131
1.50247e-54	0.989493	3.56837e-50	Kl	Virgin_vs_PP	CA1	2.94284e-51
2.53149e-27	0.647827	6.01229e-23	Plp1	Virgin_vs_PP	CA1	2.97501e-24
8.39745e-24	0.568126	1.99439e-19	Igf2	Virgin_vs_PP	CA1	8.2239e-21
2.04663e-11	0.535194	4.86074e-07	Mef2c	Virgin_vs_PP	CA1	8.01733e-09
1.08525e-31	0.511018	2.57747e-27	Ttf1	Virgin_vs_PP	CA1	1.59424e-28
4.66188e-11	0.498881	1.1072e-06	Nrep	Virgin_vs_PP	CA1	1.44175e-08
2.62182e-16	0.494939	6.22681e-12	Hpgds	Virgin_vs_PP	CA1	1.54058e-13
1.15679e-14	0.47426	2.74738e-10	Mid1	Virgin_vs_PP	CA1	5.76019e-12
1.52996e-19	0.446491	3.63366e-15	Lin54	Virgin_vs_PP	CA1	9.98895e-17
4.24852e-14	0.426905	1.00902e-09	BC051077	Virgin_vs_PP	CA1	1.92033e-11
3.05374e-08	0.416773	0.000725264	Edil3	Virgin_vs_PP	CA1	4.07814e-06
3.5194e-13	0.410623	8.35857e-09	Ptgds	Virgin_vs_PP	CA1	1.47714e-10
3.46333e-09	0.391467	8.2254e-05	Cldn11	Virgin_vs_PP	CA1	5.65292e-07
2.91214e-10	0.387775	6.91634e-06	Slc1a2	Virgin_vs_PP	CA1	7.43989e-08
0.0018781	0.386092	1	Pip5k1b	Virgin_vs_PP	CA1	0.042003
4.64177e-11	0.384987	1.10242e-06	Ncald	Virgin_vs_PP	CA1	1.44175e-08
1.48949e-10	0.379576	3.53753e-06	Cst3	Virgin_vs_PP	CA1	4.16772e-08
3.35136e-07	0.363656	0.00795948	Aldoc	Virgin_vs_PP	CA1	3.39527e-05
8.65988e-09	0.355091	0.000205672	Glul	Virgin_vs_PP	CA1	1.30475e-06
1.84859e-06	0.352009	0.043904	Atp1a2	Virgin_vs_PP	CA1	0.000146788
6.45e-10	0.341632	1.53188e-05	Rab33b	Virgin_vs_PP	CA1	1.40371e-07
4.14381e-10	0.341533	9.84154e-06	Rmi2	Virgin_vs_PP	CA1	1.01454e-07
1.16142e-08	0.33734	0.000275838	Prlr	Virgin_vs_PP	CA1	1.70613e-06
1.71804e-08	0.332793	0.000408034	Cit	Virgin_vs_PP	CA1	2.46224e-06
1.41805e-07	0.332366	0.00336788	P3h3	Virgin_vs_PP	CA1	1.6024e-05
3.80398e-07	0.331544	0.00903445	Clu	Virgin_vs_PP	CA1	3.78851e-05
8.29805e-07	0.32933	0.0197079	Car10	Virgin_vs_PP	CA1	7.50144e-05
8.67555e-06	0.327241	0.206044	Atp2b4	Virgin_vs_PP	CA1	0.000554104
1.68199e-09	0.326195	3.99472e-05	Golga3	Virgin_vs_PP	CA1	3.29446e-07
6.13072e-07	0.317889	0.0145605	Cspg5	Virgin_vs_PP	CA1	6.00402e-05
2.38569e-07	0.317345	0.00566601	Apoe	Virgin_vs_PP	CA1	2.45935e-05
2.35107e-07	0.315537	0.0055838	Exosc2	Virgin_vs_PP	CA1	2.45935e-05
4.27587e-05	0.311263	1	Rxfp1	Virgin_vs_PP	CA1	0.00216595
2.92036e-09	0.307125	6.93584e-05	Tspan7	Virgin_vs_PP	CA1	4.90286e-07
4.49908e-08	0.304607	0.00106853	Phkg1	Virgin_vs_PP	CA1	5.50762e-06
1.87013e-09	0.30206	4.44157e-05	Ccdc62	Virgin_vs_PP	CA1	3.54481e-07
1.18632e-05	0.301195	0.28175	Tbc1d9	Virgin_vs_PP	CA1	0.000711305
4.02519e-08	0.297447	0.000955981	Als2	Virgin_vs_PP	CA1	5.14174e-06
2.64201e-08	0.296741	0.000627476	Bcas2	Virgin_vs_PP	CA1	3.69629e-06
9.93061e-07	0.292744	0.0235852	AU022252	Virgin_vs_PP	CA1	8.58122e-05
2.25898e-07	0.292621	0.00536508	Samhd1	Virgin_vs_PP	CA1	2.41341e-05
2.24986e-06	0.292342	0.0534343	Tshz2	Virgin_vs_PP	CA1	0.000170852
0.000420834	0.290184	1	Kcnk1	Virgin_vs_PP	CA1	0.0137598
2.02495e-06	0.287785	0.0480926	Chgb	Virgin_vs_PP	CA1	0.000156561
4.32107e-08	0.28547	0.00102626	Mme	Virgin_vs_PP	CA1	5.40226e-06
1.6422e-06	0.284292	0.0390022	Itch	Virgin_vs_PP	CA1	0.000132186
8.18303e-06	0.283958	0.194347	Srcin1	Virgin_vs_PP	CA1	0.00052839
3.14803e-05	0.282723	0.747657	Slc17a6	Virgin_vs_PP	CA1	0.00166808
5.24691e-06	0.279077	0.124614	Lrrc2	Virgin_vs_PP	CA1	0.000371456
1.24768e-06	0.278623	0.0296324	Gm13056	Virgin_vs_PP	CA1	0.000106252
2.15666e-09	0.275857	5.12206e-05	Gm7609	Virgin_vs_PP	CA1	3.72721e-07
6.07624e-06	0.27545	0.144311	Bckdk	Virgin_vs_PP	CA1	0.000425047
0.000435319	0.273766	1	Ier5	Virgin_vs_PP	CA1	0.0139588
6.00238e-08	0.272596	0.00142556	Sparcl1	Virgin_vs_PP	CA1	7.19795e-06
0.000626324	0.272104	1	Tox	Virgin_vs_PP	CA1	0.0186067
0.000210291	0.265987	1	Magi1	Virgin_vs_PP	CA1	0.00792097
0.000684204	0.265939	1	Spock3	Virgin_vs_PP	CA1	0.0196116
2.96963e-06	0.264317	0.0705288	Sst	Virgin_vs_PP	CA1	0.000218646
0.000212651	0.264067	1	Dtna	Virgin_vs_PP	CA1	0.0079401
8.22863e-05	0.2637	1	AK010878	Virgin_vs_PP	CA1	0.00363544
0.000208755	0.262988	1	Lgmn	Virgin_vs_PP	CA1	0.00791383
5.31975e-05	0.262859	1	Chd8	Virgin_vs_PP	CA1	0.0025622
2.83147e-05	0.262314	0.672474	Adam28	Virgin_vs_PP	CA1	0.00155493
2.26794e-06	0.260286	0.0538636	Unc13d	Virgin_vs_PP	CA1	0.000170852
0.000392284	0.256989	1	Igsf21	Virgin_vs_PP	CA1	0.0130969
0.000113915	0.25653	1	Ide	Virgin_vs_PP	CA1	0.00481559
9.46641e-06	0.251534	0.224827	Exph5	Virgin_vs_PP	CA1	0.000585522
0.000177334	0.248733	1	Smg5	Virgin_vs_PP	CA1	0.00713709
2.25411e-05	0.248533	0.535351	Synrg	Virgin_vs_PP	CA1	0.00128594
0.000160244	0.248104	1	Glg1	Virgin_vs_PP	CA1	0.00658457
0.00132842	0.247557	1	Pitpnm3	Virgin_vs_PP	CA1	0.0318026
0.00294756	0.244806	1	Tshz3	Virgin_vs_PP	CA1	0.057997
0.00210739	0.244764	1	Kcnq5	Virgin_vs_PP	CA1	0.0448661
0.000705049	0.244088	1	Mal	Virgin_vs_PP	CA1	0.0198936
0.000263973	0.241193	1	Pdgfrl	Virgin_vs_PP	CA1	0.00951599
0.0036516	0.237905	1	Arl6ip5	Virgin_vs_PP	CA1	0.0660209
0.00041958	0.235434	1	Slc39a10	Virgin_vs_PP	CA1	0.0137598
0.000659967	0.235359	1	Sag	Virgin_vs_PP	CA1	0.0191033
0.000874519	0.232902	1	Plcxd2	Virgin_vs_PP	CA1	0.0232519
0.00133142	0.232753	1	Clstn2	Virgin_vs_PP	CA1	0.0318026
8.14176e-06	0.231714	0.193367	Ptprd	Virgin_vs_PP	CA1	0.00052839
8.51134e-05	0.230359	1	Kcna2	Virgin_vs_PP	CA1	0.00373228
0.0166619	0.229704	1	Tcirg1	Virgin_vs_PP	CA1	0.163448
4.51598e-05	0.229058	1	Pcsk2	Virgin_vs_PP	CA1	0.0022488
0.00140956	0.228852	1	Slc38a2	Virgin_vs_PP	CA1	0.0335327
0.00085575	0.22776	1	Garnl3	Virgin_vs_PP	CA1	0.0228563
0.00294002	0.225661	1	Msi2	Virgin_vs_PP	CA1	0.057997
0.000121711	0.225616	1	Slc28a3	Virgin_vs_PP	CA1	0.00507214
1.17635e-14	0.224838	2.79383e-10	H2-Q4	Virgin_vs_PP	CA1	5.76019e-12
0.000545293	0.22455	1	Snrpc	Virgin_vs_PP	CA1	0.0167756
0.00841043	0.224398	1	Car2	Virgin_vs_PP	CA1	0.108615
0.00295558	0.223264	1	Tet2	Virgin_vs_PP	CA1	0.057997
0.000241975	0.223255	1	Hopx	Virgin_vs_PP	CA1	0.00888652
0.000404369	0.223238	1	Kcnc4	Virgin_vs_PP	CA1	0.0134241
0.000994622	0.223234	1	H2-T23	Virgin_vs_PP	CA1	0.0255214
0.000665271	0.222435	1	Abcb9	Virgin_vs_PP	CA1	0.0191624
0.0015378	0.221845	1	Lrrc17	Virgin_vs_PP	CA1	0.0358576
0.00088692	0.221645	1	Cnp	Virgin_vs_PP	CA1	0.0234754
0.000921663	0.220507	1	Tiam1	Virgin_vs_PP	CA1	0.0240725
0.000605308	0.220477	1	Cacng2	Virgin_vs_PP	CA1	0.01824
2.31758e-10	0.22042	5.50424e-06	Nkain3	Virgin_vs_PP	CA1	6.19004e-08
0.000256935	0.2194	1	Lin9	Virgin_vs_PP	CA1	0.00931945
0.0140314	0.219294	1	Pcdh7	Virgin_vs_PP	CA1	0.151074
0.0402569	0.217943	1	Slc1a3	Virgin_vs_PP	CA1	0.254902
0.00304552	0.217852	1	Pcdh9	Virgin_vs_PP	CA1	0.0588667
0.0121551	0.217175	1	Pcdh15	Virgin_vs_PP	CA1	0.139499
0.000650224	0.216688	1	Dlx6	Virgin_vs_PP	CA1	0.0189283
0.00347325	0.216022	1	Pik3r1	Virgin_vs_PP	CA1	0.0642533
0.000432106	0.215083	1	Ybey	Virgin_vs_PP	CA1	0.0139588
0.00390974	0.215059	1	Pkig	Virgin_vs_PP	CA1	0.0694067
0.00283547	0.214531	1	Trak1	Virgin_vs_PP	CA1	0.057255
0.00973978	0.214145	1	Vstm2a	Virgin_vs_PP	CA1	0.119981
0.0114788	0.212925	1	Ndufa2	Virgin_vs_PP	CA1	0.133299
0.00259146	0.212918	1	Atrn	Virgin_vs_PP	CA1	0.0532426
5.60181e-05	0.212393	1	Mbp	Virgin_vs_PP	CA1	0.00265453
0.00332141	0.211512	1	Dnmt3a	Virgin_vs_PP	CA1	0.0627543
0.00105414	0.211352	1	Zfp322a	Virgin_vs_PP	CA1	0.0266988
0.0253381	0.210194	1	Cd34	Virgin_vs_PP	CA1	0.204398
0.00441229	0.209641	1	Mrpl51	Virgin_vs_PP	CA1	0.0758087
0.00459899	0.205855	1	Nudt5	Virgin_vs_PP	CA1	0.0772105
0.000842327	0.205636	1	Gm21750	Virgin_vs_PP	CA1	0.0226338
0.00150223	0.205005	1	Bsg	Virgin_vs_PP	CA1	0.0355931
0.00204482	0.204859	1	Tctn2	Virgin_vs_PP	CA1	0.0441741
0.00555195	0.204159	1	Pde7a	Virgin_vs_PP	CA1	0.0870965
0.000537618	0.202933	1	Mtg2	Virgin_vs_PP	CA1	0.0166265
0.00237559	0.202895	1	Mirg	Virgin_vs_PP	CA1	0.0500322
0.00110749	0.202878	1	Park2	Virgin_vs_PP	CA1	0.0277384
0.000766267	0.201933	1	Csf3r	Virgin_vs_PP	CA1	0.0210401
0.00711881	0.201523	1	Dpy19l1	Virgin_vs_PP	CA1	0.100848
0.0208865	0.200962	1	Slc30a3	Virgin_vs_PP	CA1	0.186518
0.00288377	0.200067	1	Tango2	Virgin_vs_PP	CA1	0.0576362
0.00321046	0.199787	1	Ctsd	Virgin_vs_PP	CA1	0.0616492
0.000319903	0.199083	1	Slc12a2	Virgin_vs_PP	CA1	0.0109927
0.0125075	0.198552	1	Elovl5	Virgin_vs_PP	CA1	0.140759
0.0263479	0.19839	1	Ept1	Virgin_vs_PP	CA1	0.209886
0.00361818	0.19803	1	Atp5l	Virgin_vs_PP	CA1	0.0658762
0.0577328	0.197077	1	Atp1b2	Virgin_vs_PP	CA1	0.304522
0.00238925	0.197038	1	Cyth1	Virgin_vs_PP	CA1	0.0501401
0.000421505	0.196744	1	Mc1r	Virgin_vs_PP	CA1	0.0137598
0.000437102	0.19631	1	Fut9	Virgin_vs_PP	CA1	0.0139588
0.000914665	0.195793	1	Slc23a1	Virgin_vs_PP	CA1	0.0240725
0.000336791	0.195744	1	Tsen2	Virgin_vs_PP	CA1	0.0114392
1.31077e-06	0.194931	0.0311307	Nrxn1	Virgin_vs_PP	CA1	0.00011003
0.00373	0.193461	1	Ythdc2	Virgin_vs_PP	CA1	0.0670259
0.00493283	0.193361	1	Pcdh10	Virgin_vs_PP	CA1	0.0811913
0.0159903	0.193058	1	Sp1	Virgin_vs_PP	CA1	0.160274
0.0274883	0.19289	1	Ptpre	Virgin_vs_PP	CA1	0.213089
0.000650702	0.192507	1	Chd4	Virgin_vs_PP	CA1	0.0189283
0.00821609	0.19224	1	Tmem63b	Virgin_vs_PP	CA1	0.107046
0.0017971	0.191756	1	Lynx1	Virgin_vs_PP	CA1	0.0409293
0.00326923	0.191662	1	Ndufb9	Virgin_vs_PP	CA1	0.0621682
0.004488	0.191589	1	Ticrr	Virgin_vs_PP	CA1	0.0766612
0.00675945	0.191541	1	Dcaf12	Virgin_vs_PP	CA1	0.0976445
0.00539297	0.191326	1	Gas6	Virgin_vs_PP	CA1	0.0857026
0.00650093	0.191073	1	Scmh1	Virgin_vs_PP	CA1	0.095738
0.0145332	0.190604	1	Lingo2	Virgin_vs_PP	CA1	0.152884
0.0274253	0.188574	1	Cntn3	Virgin_vs_PP	CA1	0.213089
0.00511738	0.187718	1	Abhd3	Virgin_vs_PP	CA1	0.0832956
0.00724841	0.187591	1	Tnrc6c	Virgin_vs_PP	CA1	0.101409
0.0158859	0.187362	1	Cep63	Virgin_vs_PP	CA1	0.159565
0.0312618	0.18653	1	Ppm1h	Virgin_vs_PP	CA1	0.225444
0.00346356	0.186376	1	Gm21833	Virgin_vs_PP	CA1	0.0642533
0.0242255	0.185979	1	Nudt4	Virgin_vs_PP	CA1	0.199476
0.008721	0.185885	1	Epha10	Virgin_vs_PP	CA1	0.111644
0.0267416	0.185569	1	Ube2e1	Virgin_vs_PP	CA1	0.210564
0.0396897	0.185234	1	Mgll	Virgin_vs_PP	CA1	0.253381
0.0346428	0.185117	1	Kcnd3	Virgin_vs_PP	CA1	0.23725
0.00683505	0.18502	1	Cd81	Virgin_vs_PP	CA1	0.097958
0.00328538	0.184996	1	Rpl23	Virgin_vs_PP	CA1	0.0622738
0.00831407	0.184903	1	Nat8l	Virgin_vs_PP	CA1	0.107844
0.00192226	0.183649	1	Telo2	Virgin_vs_PP	CA1	0.0424815
0.0281521	0.183506	1	Igfbp5	Virgin_vs_PP	CA1	0.215113
0.0114463	0.183379	1	Cmtr1	Virgin_vs_PP	CA1	0.133299
0.00673674	0.182867	1	Camk2n2	Virgin_vs_PP	CA1	0.0976445
0.00546084	0.18277	1	Mt1	Virgin_vs_PP	CA1	0.0864903
0.0020718	0.1825	1	Trf	Virgin_vs_PP	CA1	0.044349
0.00120992	0.182433	1	Sgsm2	Virgin_vs_PP	CA1	0.0296228
0.0118363	0.182375	1	Erdr1	Virgin_vs_PP	CA1	0.136641
0.0070677	0.182304	1	Abhd18	Virgin_vs_PP	CA1	0.1008
0.000843568	0.182258	1	Atp2b2	Virgin_vs_PP	CA1	0.0226338
0.0201305	0.181648	1	Cadm4	Virgin_vs_PP	CA1	0.183675
0.00428193	0.18145	1	Nom1	Virgin_vs_PP	CA1	0.0740021
0.0112663	0.181193	1	Lrtm2	Virgin_vs_PP	CA1	0.131612
0.0142578	0.181159	1	Nefm	Virgin_vs_PP	CA1	0.152027
0.00102188	0.180501	1	St3gal5	Virgin_vs_PP	CA1	0.0259938
0.00644948	0.179985	1	Cdk16	Virgin_vs_PP	CA1	0.0952189
0.0074446	0.179192	1	2810403D21Rik	Virgin_vs_PP	CA1	0.103415
0.0184867	0.178959	1	Cntnap1	Virgin_vs_PP	CA1	0.175177
0.0215619	0.178873	1	Ciapin1	Virgin_vs_PP	CA1	0.189263
0.000558877	0.177575	1	Gng5	Virgin_vs_PP	CA1	0.0170153
0.0130717	0.177255	1	Ndufs5	Virgin_vs_PP	CA1	0.144651
0.0339177	0.176858	1	Sesn1	Virgin_vs_PP	CA1	0.23558
0.0144464	0.176055	1	Cdk8	Virgin_vs_PP	CA1	0.152752
0.00716649	0.175242	1	Slamf1	Virgin_vs_PP	CA1	0.100848
0.00207556	0.175089	1	2500004C02Rik	Virgin_vs_PP	CA1	0.044349
0.0195677	0.175065	1	Gm21897	Virgin_vs_PP	CA1	0.182219
0.0103539	0.174756	1	Pdgfb	Virgin_vs_PP	CA1	0.124163
0.0058631	0.17408	1	Cdc42	Virgin_vs_PP	CA1	0.0897176
0.0261928	0.173924	1	Cav2	Virgin_vs_PP	CA1	0.2094
0.0199248	0.173712	1	Rps13	Virgin_vs_PP	CA1	0.183272
0.00516208	0.173636	1	Aurkaip1	Virgin_vs_PP	CA1	0.0834791
0.0290591	0.173453	1	Fam63b	Virgin_vs_PP	CA1	0.218203
0.125556	0.173352	1	Arap2	Virgin_vs_PP	CA1	0.430186
0.0194537	0.173215	1	Sept2	Virgin_vs_PP	CA1	0.181867
0.00465096	0.173193	1	Zc3hc1	Virgin_vs_PP	CA1	0.0776393
0.00796918	0.172387	1	Mei4	Virgin_vs_PP	CA1	0.1067
0.0139619	0.172111	1	Vldlr	Virgin_vs_PP	CA1	0.151074
0.0371666	0.172031	1	Cox20	Virgin_vs_PP	CA1	0.243582
0.0114717	0.171481	1	Rps6kb1	Virgin_vs_PP	CA1	0.133299
0.0445025	0.171372	1	Tmem47	Virgin_vs_PP	CA1	0.266019
0.00762215	0.171139	1	Stxbp2	Virgin_vs_PP	CA1	0.104436
0.00980837	0.171063	1	Prex2	Virgin_vs_PP	CA1	0.120321
0.00768937	0.170957	1	Gatm	Virgin_vs_PP	CA1	0.105076
0.0213219	0.170636	1	Grik5	Virgin_vs_PP	CA1	0.189194
0.00272882	0.170502	1	Tmem59	Virgin_vs_PP	CA1	0.0558695
0.0271365	0.170458	1	Ndufc2	Virgin_vs_PP	CA1	0.212273
0.0760859	0.170331	1	Necab1	Virgin_vs_PP	CA1	0.350927
0.0157973	0.170114	1	Tkt	Virgin_vs_PP	CA1	0.15907
0.000513731	0.170092	1	Cox8a	Virgin_vs_PP	CA1	0.0160568
0.000249424	0.170083	1	Aplp2	Virgin_vs_PP	CA1	0.00910319
0.0215804	0.170011	1	Gm26737	Virgin_vs_PP	CA1	0.189263
0.0545467	0.169839	1	Sgsm1	Virgin_vs_PP	CA1	0.295628
0.00453304	0.16982	1	Suclg2	Virgin_vs_PP	CA1	0.0769807
0.0136588	0.169776	1	Ppt1	Virgin_vs_PP	CA1	0.149458
0.0112637	0.169587	1	Gm37065	Virgin_vs_PP	CA1	0.131612
0.00819674	0.169303	1	Amer2	Virgin_vs_PP	CA1	0.107046
0.0332535	0.168981	1	Unkl	Virgin_vs_PP	CA1	0.232893
0.00200355	0.168587	1	Plpp3	Virgin_vs_PP	CA1	0.0436032
0.211509	0.168398	1	Bpgm	Virgin_vs_PP	CA1	0.547011
0.0155058	0.168385	1	Deptor	Virgin_vs_PP	CA1	0.157907
0.0167899	0.168277	1	Zfyve28	Virgin_vs_PP	CA1	0.16375
0.0071	0.16817	1	0610031O16Rik	Virgin_vs_PP	CA1	0.100848
0.00508011	0.167288	1	Gde1	Virgin_vs_PP	CA1	0.0830184
0.0205845	0.167252	1	St6galnac6	Virgin_vs_PP	CA1	0.185872
0.0357206	0.16714	1	Olfm3	Virgin_vs_PP	CA1	0.240981
0.00108355	0.167112	1	Fubp1	Virgin_vs_PP	CA1	0.027326
0.085417	0.166797	1	Opa3	Virgin_vs_PP	CA1	0.365025
0.0196135	0.166253	1	Csmd1	Virgin_vs_PP	CA1	0.182356
0.0943983	0.165932	1	Sqle	Virgin_vs_PP	CA1	0.380181
0.00985082	0.165841	1	Slc2a3	Virgin_vs_PP	CA1	0.120459
0.00812973	0.165542	1	Tspan3	Virgin_vs_PP	CA1	0.107046
0.0100209	0.165237	1	Slc4a3	Virgin_vs_PP	CA1	0.121408
0.00644496	0.164545	1	Cox6a1	Virgin_vs_PP	CA1	0.0952189
0.0111165	0.164454	1	Gm37214	Virgin_vs_PP	CA1	0.130381
0.0033708	0.164447	1	Ndufb2	Virgin_vs_PP	CA1	0.0631429
0.00795657	0.164075	1	Ankrd13a	Virgin_vs_PP	CA1	0.1067
0.00459084	0.16371	1	Adtrp	Virgin_vs_PP	CA1	0.0772105
0.00383639	0.163673	1	Arl16	Virgin_vs_PP	CA1	0.0685186
0.00557815	0.16315	1	Podxl2	Virgin_vs_PP	CA1	0.0871734
0.0157497	0.162955	1	Ttyh1	Virgin_vs_PP	CA1	0.159012
0.0773695	0.162737	1	Hdac7	Virgin_vs_PP	CA1	0.352928
0.0174935	0.162352	1	Kctd14	Virgin_vs_PP	CA1	0.168236
0.0502282	0.162296	1	Cd200	Virgin_vs_PP	CA1	0.283517
0.0705617	0.162084	1	Pcp4	Virgin_vs_PP	CA1	0.339297
0.0207624	0.161981	1	Ncor2	Virgin_vs_PP	CA1	0.186347
0.023789	0.161403	1	Grik3	Virgin_vs_PP	CA1	0.198127
0.00655549	0.161329	1	Emc3	Virgin_vs_PP	CA1	0.0959422
0.0199628	0.160543	1	Hyal3	Virgin_vs_PP	CA1	0.183283
0.0211755	0.159948	1	Tnfaip1	Virgin_vs_PP	CA1	0.188526
0.0158096	0.159162	1	Maoa	Virgin_vs_PP	CA1	0.15907
0.000627298	0.15913	1	Ndrg2	Virgin_vs_PP	CA1	0.0186067
0.0265982	0.158629	1	Cxx1a	Virgin_vs_PP	CA1	0.210564
0.0344343	0.158611	1	Lrrc14b	Virgin_vs_PP	CA1	0.236374
0.0521771	0.158591	1	Mier1	Virgin_vs_PP	CA1	0.291161
0.0342598	0.158332	1	Snx21	Virgin_vs_PP	CA1	0.236374
0.0353672	0.158158	1	Pknox2	Virgin_vs_PP	CA1	0.239974
0.0407959	0.158126	1	Rfxap	Virgin_vs_PP	CA1	0.256931
0.0388062	0.157643	1	Rps28	Virgin_vs_PP	CA1	0.249754
0.0894629	0.157458	1	Acadm	Virgin_vs_PP	CA1	0.372485
0.0227868	0.157357	1	Mgat5	Virgin_vs_PP	CA1	0.194113
0.0100939	0.157254	1	Uggt1	Virgin_vs_PP	CA1	0.12179
0.00939282	0.157122	1	Tubb4b	Virgin_vs_PP	CA1	0.11743
0.0367802	0.156983	1	Wnk1	Virgin_vs_PP	CA1	0.243183
0.0140038	0.15683	1	Psmd13	Virgin_vs_PP	CA1	0.151074
0.120481	0.15631	1	Tmem18	Virgin_vs_PP	CA1	0.422654
0.026765	0.156066	1	Tenm3	Virgin_vs_PP	CA1	0.210564
0.112562	0.155802	1	Dock7	Virgin_vs_PP	CA1	0.409799
0.017177	0.155783	1	Camta1	Virgin_vs_PP	CA1	0.166425
0.0223877	0.155442	1	Ttyh3	Virgin_vs_PP	CA1	0.192325
0.0017137	0.155331	1	Dlgap5	Virgin_vs_PP	CA1	0.0393347
0.064324	0.155147	1	Anapc7	Virgin_vs_PP	CA1	0.323539
0.0250387	0.15507	1	Sdf4	Virgin_vs_PP	CA1	0.203298
0.105117	0.154823	1	Lasp1	Virgin_vs_PP	CA1	0.398553
0.00183611	0.154602	1	Cck	Virgin_vs_PP	CA1	0.0413372
0.0364198	0.154547	1	Dusp14	Virgin_vs_PP	CA1	0.243183
0.00258198	0.154513	1	Strbp	Virgin_vs_PP	CA1	0.0532341
0.0404798	0.154302	1	Mcf2l	Virgin_vs_PP	CA1	0.255935
0.0357709	0.15425	1	Tnpo2	Virgin_vs_PP	CA1	0.241043
0.0629565	0.154211	1	Fdft1	Virgin_vs_PP	CA1	0.320126
0.0780044	0.154105	1	Cox17	Virgin_vs_PP	CA1	0.353503
0.0718399	0.154066	1	Erc1	Virgin_vs_PP	CA1	0.342361
0.0227761	0.154039	1	Cdk14	Virgin_vs_PP	CA1	0.194113
0.0130027	0.153964	1	Ccbl2	Virgin_vs_PP	CA1	0.144349
0.00539652	0.153962	1	Ccnd2	Virgin_vs_PP	CA1	0.0857026
0.0535884	0.153636	1	Pex1	Virgin_vs_PP	CA1	0.294011
0.109096	0.15351	1	Lemd3	Virgin_vs_PP	CA1	0.40365
0.0589344	0.152941	1	4933434E20Rik	Virgin_vs_PP	CA1	0.307771
0.0281173	0.152927	1	Fkbp4	Virgin_vs_PP	CA1	0.215113
0.0132378	0.152903	1	Vsnl1	Virgin_vs_PP	CA1	0.145939
0.0278721	0.152884	1	Fam69b	Virgin_vs_PP	CA1	0.21397
0.0208081	0.152492	1	Reep5	Virgin_vs_PP	CA1	0.186347
0.0139358	0.15237	1	Pcsk1n	Virgin_vs_PP	CA1	0.151074
0.0508607	0.152072	1	Fam184a	Virgin_vs_PP	CA1	0.285988
0.0513298	0.151765	1	Rgs17	Virgin_vs_PP	CA1	0.287525
0.0439716	0.15148	1	Chic2	Virgin_vs_PP	CA1	0.264731
0.0141581	0.150404	1	Meis2	Virgin_vs_PP	CA1	0.151812
0.0364724	0.150269	1	Slc22a23	Virgin_vs_PP	CA1	0.243183
0.0144686	0.150097	1	Sparc	Virgin_vs_PP	CA1	0.152752
0.0204026	0.149999	1	Yipf4	Virgin_vs_PP	CA1	0.185009
0.0115169	0.1497	1	Tuba1a	Virgin_vs_PP	CA1	0.133478
0.0236743	0.149651	1	Creld1	Virgin_vs_PP	CA1	0.198127
0.0139923	0.149453	1	Nmd3	Virgin_vs_PP	CA1	0.151074
0.0267979	0.149212	1	Fbxo41	Virgin_vs_PP	CA1	0.210564
0.0100934	0.14916	1	Fn1	Virgin_vs_PP	CA1	0.12179
0.0258446	0.148424	1	Platr9	Virgin_vs_PP	CA1	0.207463
0.103895	0.148265	1	Tgoln1	Virgin_vs_PP	CA1	0.395461
0.058367	0.148148	1	Cyp46a1	Virgin_vs_PP	CA1	0.307027
0.0343237	0.147866	1	Slco3a1	Virgin_vs_PP	CA1	0.236374
0.03596	0.147745	1	Swt1	Virgin_vs_PP	CA1	0.241763
0.0477496	0.147705	1	Ngef	Virgin_vs_PP	CA1	0.277524
0.00202933	0.147312	1	Tecr	Virgin_vs_PP	CA1	0.0440013
0.0561403	0.14715	1	Sytl2	Virgin_vs_PP	CA1	0.300435
0.0309905	0.147131	1	Ndufa9	Virgin_vs_PP	CA1	0.225444
0.15033	0.146962	1	Hsd17b12	Virgin_vs_PP	CA1	0.468055
0.0487223	0.14671	1	Tmem109	Virgin_vs_PP	CA1	0.279536
0.0258849	0.146524	1	Cabp1	Virgin_vs_PP	CA1	0.207503
0.187325	0.146489	1	Dner	Virgin_vs_PP	CA1	0.522356
0.141073	0.146326	1	Esco1	Virgin_vs_PP	CA1	0.455692
0.0768887	0.146257	1	AC132444.6	Virgin_vs_PP	CA1	0.352604
0.0768961	0.146226	1	Ift20	Virgin_vs_PP	CA1	0.352604
0.0859093	0.146226	1	Ndufa6	Virgin_vs_PP	CA1	0.366065
0.0143027	0.146151	1	Col4a1	Virgin_vs_PP	CA1	0.152027
0.13454	0.14595	1	Hs6st2	Virgin_vs_PP	CA1	0.446498
0.0311204	0.145837	1	Fam81a	Virgin_vs_PP	CA1	0.225444
0.00750419	0.145762	1	Nfkb1	Virgin_vs_PP	CA1	0.103627
0.217979	0.145712	1	Zfp30	Virgin_vs_PP	CA1	0.554238
0.118902	0.145404	1	Nae1	Virgin_vs_PP	CA1	0.420853
0.00855238	0.145338	1	Coq9	Virgin_vs_PP	CA1	0.109964
0.0150807	0.145224	1	Gm10636	Virgin_vs_PP	CA1	0.155736
0.0127138	0.145118	1	Cplx2	Virgin_vs_PP	CA1	0.141758
0.012519	0.144902	1	Scd2	Virgin_vs_PP	CA1	0.140759
0.010681	0.144692	1	Nek7	Virgin_vs_PP	CA1	0.126535
0.0237515	0.144528	1	Casc4	Virgin_vs_PP	CA1	0.198127
0.0663138	0.144425	1	Stx3	Virgin_vs_PP	CA1	0.328549
0.734548	0.144374	1	Dck	Virgin_vs_PP	CA1	0.888074
0.0444921	0.144336	1	Rilpl2	Virgin_vs_PP	CA1	0.266019
0.0195091	0.14433	1	Banp	Virgin_vs_PP	CA1	0.181961
0.0324019	0.144247	1	Zmat4	Virgin_vs_PP	CA1	0.229331
0.0723995	0.14405	1	Polr2l	Virgin_vs_PP	CA1	0.34308
0.0229732	0.143973	1	Spata1	Virgin_vs_PP	CA1	0.195073
0.0243175	0.143938	1	Noa1	Virgin_vs_PP	CA1	0.199476
0.0723015	0.143906	1	Unc5d	Virgin_vs_PP	CA1	0.34308
0.0187219	0.143809	1	Raph1	Virgin_vs_PP	CA1	0.175454
0.286704	0.143776	1	Smc6	Virgin_vs_PP	CA1	0.622109
0.0315376	0.143626	1	Timp2	Virgin_vs_PP	CA1	0.225444
0.07683	0.143591	1	Sclt1	Virgin_vs_PP	CA1	0.352604
0.148812	0.143508	1	Hnrnph3	Virgin_vs_PP	CA1	0.465859
0.0111161	0.143407	1	Syngr3	Virgin_vs_PP	CA1	0.130381
0.135112	0.143304	1	Sfxn1	Virgin_vs_PP	CA1	0.447277
0.0752894	0.14324	1	Pcsk5	Virgin_vs_PP	CA1	0.348621
0.0308789	0.143077	1	Nceh1	Virgin_vs_PP	CA1	0.225444
0.196664	0.142793	1	Mllt10	Virgin_vs_PP	CA1	0.531589
0.0524477	0.142787	1	Atf7	Virgin_vs_PP	CA1	0.291765
0.0722961	0.142366	1	Dnajb14	Virgin_vs_PP	CA1	0.34308
0.00994898	0.142299	1	Atp6v0c	Virgin_vs_PP	CA1	0.120876
0.248226	0.142209	1	Gprc5b	Virgin_vs_PP	CA1	0.583432
0.032457	0.142085	1	Ppargc1b	Virgin_vs_PP	CA1	0.229331
0.106336	0.14206	1	Kcnj9	Virgin_vs_PP	CA1	0.401
0.0388898	0.141856	1	Gm2694	Virgin_vs_PP	CA1	0.250018
0.0621649	0.141369	1	Iqgap1	Virgin_vs_PP	CA1	0.31736
0.0123836	0.141324	1	Crtc1	Virgin_vs_PP	CA1	0.140428
0.105179	0.141063	1	Ctdspl	Virgin_vs_PP	CA1	0.398553
0.0512372	0.140895	1	Ash2l	Virgin_vs_PP	CA1	0.287471
0.0942103	0.140588	1	Rap1gap2	Virgin_vs_PP	CA1	0.380181
0.0437148	0.140501	1	A130010J15Rik	Virgin_vs_PP	CA1	0.264498
0.0669781	0.140121	1	Setdb1	Virgin_vs_PP	CA1	0.330448
0.0560976	0.139864	1	Fbxl2	Virgin_vs_PP	CA1	0.300435
0.00577677	0.139695	1	Cacnb4	Virgin_vs_PP	CA1	0.0890926
0.0369889	0.139433	1	Clic4	Virgin_vs_PP	CA1	0.243196
0.0152152	0.139255	1	Psmb5	Virgin_vs_PP	CA1	0.155826
0.0526065	0.138597	1	Lrrk2	Virgin_vs_PP	CA1	0.291884
0.0880323	0.138301	1	Prpf38b	Virgin_vs_PP	CA1	0.370266
0.0263904	0.138104	1	Syngr1	Virgin_vs_PP	CA1	0.209886
0.0425467	0.137979	1	Znhit3	Virgin_vs_PP	CA1	0.262246
0.0843595	0.137934	1	Nova1	Virgin_vs_PP	CA1	0.364215
0.0285616	0.137762	1	B4galt5	Virgin_vs_PP	CA1	0.21755
0.0380539	0.137576	1	2900055J20Rik	Virgin_vs_PP	CA1	0.24599
0.0313625	0.137461	1	C2cd5	Virgin_vs_PP	CA1	0.225444
0.153985	0.137441	1	Hist1h2bc	Virgin_vs_PP	CA1	0.473229
0.068874	0.137241	1	Grsf1	Virgin_vs_PP	CA1	0.335655
0.0869047	0.137186	1	Plk4	Virgin_vs_PP	CA1	0.368436
0.014647	0.136994	1	Eef2	Virgin_vs_PP	CA1	0.153142
0.00603468	0.136849	1	Tusc3	Virgin_vs_PP	CA1	0.0916273
0.0841752	0.136712	1	Fbxo22	Virgin_vs_PP	CA1	0.363981
0.149706	0.136246	1	Nrp2	Virgin_vs_PP	CA1	0.467414
0.0252522	0.136032	1	Gm43735	Virgin_vs_PP	CA1	0.204398
0.029372	0.135951	1	Ckb	Virgin_vs_PP	CA1	0.219301
0.0286515	0.13587	1	Slc43a2	Virgin_vs_PP	CA1	0.217796
0.0380457	0.135384	1	Kcnq2	Virgin_vs_PP	CA1	0.24599
0.0663837	0.135231	1	C730034F03Rik	Virgin_vs_PP	CA1	0.328619
0.0645946	0.135127	1	Sdc3	Virgin_vs_PP	CA1	0.324131
0.0823311	0.135108	1	Eif3a	Virgin_vs_PP	CA1	0.361838
0.0488329	0.135032	1	Dbt	Virgin_vs_PP	CA1	0.279536
0.160888	0.134719	1	Marcksl1	Virgin_vs_PP	CA1	0.482647
0.0545875	0.134597	1	Zeb1	Virgin_vs_PP	CA1	0.295628
0.0471532	0.134548	1	Mxi1	Virgin_vs_PP	CA1	0.27542
0.058618	0.134463	1	Brpf1	Virgin_vs_PP	CA1	0.307027
0.0653635	0.134301	1	Chpt1	Virgin_vs_PP	CA1	0.325764
0.121722	0.134257	1	Xpr1	Virgin_vs_PP	CA1	0.424553
0.00732304	0.134104	1	Cox6b1	Virgin_vs_PP	CA1	0.10221
0.0307075	0.134084	1	Abca2	Virgin_vs_PP	CA1	0.225444
0.0590676	0.133833	1	Ssbp2	Virgin_vs_PP	CA1	0.307969
0.0279527	0.133755	1	Cox6c	Virgin_vs_PP	CA1	0.214146
0.0338625	0.133536	1	A330044P14Rik	Virgin_vs_PP	CA1	0.23558
0.189541	0.133526	1	Phf3	Virgin_vs_PP	CA1	0.524493
0.0098606	0.133503	1	Stmn1	Virgin_vs_PP	CA1	0.120459
0.290341	0.133465	1	B4gat1	Virgin_vs_PP	CA1	0.623828
0.0511233	0.133464	1	Elovl6	Virgin_vs_PP	CA1	0.28719
1.02149e-09	0.13334	2.42605e-05	Meg3	Virgin_vs_PP	CA1	2.06976e-07
0.0893534	0.133336	1	Manf	Virgin_vs_PP	CA1	0.372485
0.018548	0.133238	1	Tpt1	Virgin_vs_PP	CA1	0.17519
0.0750852	0.13314	1	Nfic	Virgin_vs_PP	CA1	0.34795
0.0539157	0.132865	1	Apba1	Virgin_vs_PP	CA1	0.294693
0.0392926	0.132841	1	Sirt2	Virgin_vs_PP	CA1	0.25198
0.200546	0.132818	1	Cog3	Virgin_vs_PP	CA1	0.535114
0.0222011	0.132774	1	Wnt4	Virgin_vs_PP	CA1	0.191778
0.117252	0.132655	1	Akt3	Virgin_vs_PP	CA1	0.41883
0.0570763	0.132593	1	Atp5g3	Virgin_vs_PP	CA1	0.303218
0.0807951	0.132553	1	Fry	Virgin_vs_PP	CA1	0.358723
0.0591484	0.132552	1	Gatsl2	Virgin_vs_PP	CA1	0.308049
0.055095	0.132533	1	Dlk2	Virgin_vs_PP	CA1	0.296463
0.0550245	0.132512	1	AB041806	Virgin_vs_PP	CA1	0.296463
0.0380229	0.132466	1	Nrk	Virgin_vs_PP	CA1	0.24599
0.0312302	0.132352	1	Gabra1	Virgin_vs_PP	CA1	0.225444
0.126204	0.132132	1	Fam110b	Virgin_vs_PP	CA1	0.431462
0.0242532	0.132069	1	Dr1	Virgin_vs_PP	CA1	0.199476
0.0342864	0.132068	1	Tulp3	Virgin_vs_PP	CA1	0.236374
0.0199303	0.131815	1	Upf3a	Virgin_vs_PP	CA1	0.183272
0.08374	0.131697	1	Serf2	Virgin_vs_PP	CA1	0.363929
0.101529	0.131489	1	Klf9	Virgin_vs_PP	CA1	0.391556
0.0186341	0.131483	1	Exoc1	Virgin_vs_PP	CA1	0.17519
0.0818837	0.131432	1	Utp11l	Virgin_vs_PP	CA1	0.361223
0.0807748	0.131418	1	Mpv17l	Virgin_vs_PP	CA1	0.358723
0.200578	0.131014	1	Cisd1	Virgin_vs_PP	CA1	0.535114
0.00790047	0.130998	1	Sdhb	Virgin_vs_PP	CA1	0.1067
0.150426	0.130927	1	Uqcrb	Virgin_vs_PP	CA1	0.468055
0.0871396	0.130787	1	Kcnma1	Virgin_vs_PP	CA1	0.368634
0.0397413	0.130769	1	Imp4	Virgin_vs_PP	CA1	0.253381
0.107668	0.130723	1	Lsm6	Virgin_vs_PP	CA1	0.403481
0.0304785	0.130673	1	Ndfip2	Virgin_vs_PP	CA1	0.224707
0.00717403	0.130647	1	Tmem108	Virgin_vs_PP	CA1	0.100848
0.14287	0.130615	1	Lims1	Virgin_vs_PP	CA1	0.456999
0.00561763	0.130581	1	Lgi2	Virgin_vs_PP	CA1	0.087446
0.0852154	0.130391	1	Efhd2	Virgin_vs_PP	CA1	0.365025
0.272342	0.130298	1	Alkbh8	Virgin_vs_PP	CA1	0.60905
0.0949225	0.130215	1	Qk	Virgin_vs_PP	CA1	0.380705
0.0636813	0.130187	1	Tmem178	Virgin_vs_PP	CA1	0.322088
0.1343	0.130175	1	Acsl5	Virgin_vs_PP	CA1	0.446498
0.0271663	0.129829	1	Dnajc3	Virgin_vs_PP	CA1	0.212273
0.202915	0.129538	1	Gtf2a2	Virgin_vs_PP	CA1	0.53721
0.125203	0.129471	1	Capns1	Virgin_vs_PP	CA1	0.430168
0.0488459	0.12941	1	Sympk	Virgin_vs_PP	CA1	0.279536
0.0594771	0.129398	1	Tsc22d4	Virgin_vs_PP	CA1	0.308527
0.0774864	0.129369	1	6430548M08Rik	Virgin_vs_PP	CA1	0.352928
0.133867	0.129074	1	Msra	Virgin_vs_PP	CA1	0.446253
0.0563374	0.129068	1	Nav2	Virgin_vs_PP	CA1	0.300944
0.129234	0.128856	1	Whsc1l1	Virgin_vs_PP	CA1	0.435528
0.0534356	0.128736	1	Nbeal1	Virgin_vs_PP	CA1	0.293446
0.0658134	0.128637	1	Iqcb1	Virgin_vs_PP	CA1	0.327343
0.0438398	0.128501	1	Galnt18	Virgin_vs_PP	CA1	0.264498
0.0219588	0.128461	1	Efr3a	Virgin_vs_PP	CA1	0.191229
0.205494	0.128319	1	Lztfl1	Virgin_vs_PP	CA1	0.540018
0.127145	0.128132	1	Atp6ap1	Virgin_vs_PP	CA1	0.432664
0.00875215	0.127746	1	Cadm1	Virgin_vs_PP	CA1	0.111799
0.0786353	0.127548	1	Rufy2	Virgin_vs_PP	CA1	0.354593
0.133967	0.127528	1	Gria4	Virgin_vs_PP	CA1	0.446253
0.139192	0.127487	1	Satb1	Virgin_vs_PP	CA1	0.452341
0.0528034	0.12742	1	Ncoa2	Virgin_vs_PP	CA1	0.291884
0.0574448	0.127412	1	Rph3a	Virgin_vs_PP	CA1	0.303821
0.148663	0.127354	1	Pfn1	Virgin_vs_PP	CA1	0.465643
0.0771595	0.127255	1	March2	Virgin_vs_PP	CA1	0.352928
0.104382	0.127238	1	Aldh1a3	Virgin_vs_PP	CA1	0.39699
0.112108	0.127126	1	Brip1os	Virgin_vs_PP	CA1	0.408907
0.0427757	0.127084	1	Sel1l	Virgin_vs_PP	CA1	0.262644
0.0774249	0.126906	1	Irf9	Virgin_vs_PP	CA1	0.352928
0.0203389	0.126746	1	Sema7a	Virgin_vs_PP	CA1	0.184716
0.0308106	0.126738	1	Cdh13	Virgin_vs_PP	CA1	0.225444
0.226719	0.126587	1	Smg7	Virgin_vs_PP	CA1	0.564651
0.127851	0.126447	1	Cstf2	Virgin_vs_PP	CA1	0.43392
0.0850279	0.126369	1	Trnp1	Virgin_vs_PP	CA1	0.365025
0.0310167	0.126186	1	Atp11a	Virgin_vs_PP	CA1	0.225444
0.0459248	0.126038	1	Grk4	Virgin_vs_PP	CA1	0.270666
0.0732659	0.126026	1	Comt	Virgin_vs_PP	CA1	0.345044
0.133477	0.125843	1	A730020E08Rik	Virgin_vs_PP	CA1	0.446253
0.20114	0.12545	1	Cflar	Virgin_vs_PP	CA1	0.535279
0.0434647	0.125046	1	Rp2	Virgin_vs_PP	CA1	0.263828
0.053303	0.125028	1	Cers4	Virgin_vs_PP	CA1	0.293266
0.162343	0.124753	1	Kifc2	Virgin_vs_PP	CA1	0.483981
0.408727	0.124651	1	Fam3c	Virgin_vs_PP	CA1	0.707915
0.126502	0.124599	1	Chchd10	Virgin_vs_PP	CA1	0.431664
0.0456373	0.124443	1	Ncbp3	Virgin_vs_PP	CA1	0.269783
0.0833133	0.124123	1	Rpap1	Virgin_vs_PP	CA1	0.363929
0.00192309	0.124057	1	Rps8	Virgin_vs_PP	CA1	0.0424815
0.140087	0.123955	1	Brd8	Virgin_vs_PP	CA1	0.453778
0.0405881	0.123866	1	Steap2	Virgin_vs_PP	CA1	0.256172
0.104975	0.123767	1	Rgs4	Virgin_vs_PP	CA1	0.398473
0.0619577	0.123689	1	Atg3	Virgin_vs_PP	CA1	0.31685
0.0692015	0.123425	1	Ccnt2	Virgin_vs_PP	CA1	0.335781
0.0273105	0.123394	1	Nckipsd	Virgin_vs_PP	CA1	0.212552
0.084921	0.123305	1	Tbr1	Virgin_vs_PP	CA1	0.365025
0.108251	0.123066	1	Phactr1	Virgin_vs_PP	CA1	0.40365
0.192053	0.123059	1	Serinc3	Virgin_vs_PP	CA1	0.526272
0.0207677	0.123042	1	Slc7a8	Virgin_vs_PP	CA1	0.186347
0.0797657	0.123021	1	Ctsb	Virgin_vs_PP	CA1	0.357283
0.0485743	0.122973	1	Tonsl	Virgin_vs_PP	CA1	0.279536
0.179554	0.122928	1	Stk38	Virgin_vs_PP	CA1	0.509833
0.0673925	0.122699	1	Amfr	Virgin_vs_PP	CA1	0.330826
0.374588	0.12263	1	Grb10	Virgin_vs_PP	CA1	0.691511
0.0151903	0.122611	1	Tyro3	Virgin_vs_PP	CA1	0.155826
0.0524346	0.122451	1	Gm42488	Virgin_vs_PP	CA1	0.291765
0.0636675	0.122306	1	Arid5a	Virgin_vs_PP	CA1	0.322088
0.187278	0.122123	1	Clk1	Virgin_vs_PP	CA1	0.522356
0.0851252	0.12192	1	Pld3	Virgin_vs_PP	CA1	0.365025
0.106392	0.121833	1	Ranbp9	Virgin_vs_PP	CA1	0.401
0.00287624	0.121809	1	Rps27rt	Virgin_vs_PP	CA1	0.0576362
0.0604603	0.121723	1	Mir124a-1hg	Virgin_vs_PP	CA1	0.311907
0.140403	0.121611	1	B630019K06Rik	Virgin_vs_PP	CA1	0.454549
0.0232834	0.121525	1	Camk2n1	Virgin_vs_PP	CA1	0.196924
0.0980689	0.121441	1	Faim2	Virgin_vs_PP	CA1	0.386609
0.0321203	0.121302	1	Pigq	Virgin_vs_PP	CA1	0.228805
0.0214962	0.121113	1	Rint1	Virgin_vs_PP	CA1	0.189263
0.0454024	0.120912	1	Dtl	Virgin_vs_PP	CA1	0.269207
0.0182181	0.120848	1	Spag9	Virgin_vs_PP	CA1	0.173778
0.111962	0.120826	1	Gm17555	Virgin_vs_PP	CA1	0.408628
0.0825037	0.120729	1	Scn2b	Virgin_vs_PP	CA1	0.362223
0.0592325	0.120727	1	Mt2	Virgin_vs_PP	CA1	0.308049
0.199501	0.120614	1	Fnbp4	Virgin_vs_PP	CA1	0.534815
0.0757998	0.120605	1	2010107E04Rik	Virgin_vs_PP	CA1	0.350157
0.0182758	0.120415	1	Cript	Virgin_vs_PP	CA1	0.173778
0.109077	0.120352	1	Pom121	Virgin_vs_PP	CA1	0.40365
0.0361719	0.120294	1	Adap1	Virgin_vs_PP	CA1	0.242331
0.176222	0.120217	1	Rab15	Virgin_vs_PP	CA1	0.505696
0.216467	0.119965	1	Tgs1	Virgin_vs_PP	CA1	0.553013
0.192999	0.119893	1	Phtf2	Virgin_vs_PP	CA1	0.527224
0.0497726	0.119868	1	Haus2	Virgin_vs_PP	CA1	0.281486
0.0389851	0.119859	1	Ptma	Virgin_vs_PP	CA1	0.250357
0.416153	0.119785	1	Bhlhe41	Virgin_vs_PP	CA1	0.712984
0.114916	0.11969	1	Rbm8a	Virgin_vs_PP	CA1	0.414517
0.0598405	0.119583	1	Fbxo3	Virgin_vs_PP	CA1	0.309255
0.0371839	0.119504	1	Gm15879	Virgin_vs_PP	CA1	0.243582
0.171202	0.119206	1	Cnot6	Virgin_vs_PP	CA1	0.496398
0.0889666	0.119143	1	Tanc2	Virgin_vs_PP	CA1	0.371636
0.129041	0.119142	1	Gnai2	Virgin_vs_PP	CA1	0.435523
0.0419963	0.119125	1	Lmbrd1	Virgin_vs_PP	CA1	0.260306
0.0794795	0.119111	1	Mcmbp	Virgin_vs_PP	CA1	0.357054
0.175227	0.119065	1	Ptpmt1	Virgin_vs_PP	CA1	0.503945
0.225762	0.119033	1	Zfp354c	Virgin_vs_PP	CA1	0.5645
0.0749139	0.119018	1	A430073D23Rik	Virgin_vs_PP	CA1	0.347831
0.0237603	0.118661	1	Pycr2	Virgin_vs_PP	CA1	0.198127
0.107336	0.118606	1	Emc4	Virgin_vs_PP	CA1	0.402751
0.165764	0.11858	1	Cers2	Virgin_vs_PP	CA1	0.48897
0.159229	0.118495	1	Znfx1	Virgin_vs_PP	CA1	0.480141
0.271457	0.118463	1	Idi1	Virgin_vs_PP	CA1	0.608289
0.0753522	0.118092	1	Gucd1	Virgin_vs_PP	CA1	0.348638
0.148183	0.118085	1	Sbds	Virgin_vs_PP	CA1	0.464883
0.0919503	0.118071	1	Ube2f	Virgin_vs_PP	CA1	0.377832
0.0648254	0.118038	1	Fyttd1	Virgin_vs_PP	CA1	0.324735
0.131542	0.117949	1	Galnt13	Virgin_vs_PP	CA1	0.441935
0.209202	0.117938	1	Slc38a10	Virgin_vs_PP	CA1	0.544683
0.00679463	0.117769	1	9930111J21Rik2	Virgin_vs_PP	CA1	0.0978561
0.0455807	0.117652	1	Supt20	Virgin_vs_PP	CA1	0.26972
0.135395	0.11761	1	Papd7	Virgin_vs_PP	CA1	0.447744
0.0928505	0.117221	1	D3Ertd254e	Virgin_vs_PP	CA1	0.378094
0.0900276	0.117203	1	Dab1	Virgin_vs_PP	CA1	0.373326
0.0551986	0.117179	1	Zdhhc8	Virgin_vs_PP	CA1	0.296478
0.0560945	0.117097	1	Rpl18	Virgin_vs_PP	CA1	0.300435
0.227078	0.11707	1	Ccdc12	Virgin_vs_PP	CA1	0.564651
0.232744	0.117055	1	Phyhipl	Virgin_vs_PP	CA1	0.568237
0.0685443	0.117	1	Islr2	Virgin_vs_PP	CA1	0.335299
0.00388379	0.116834	1	Hspa4l	Virgin_vs_PP	CA1	0.0691551
0.0419144	0.116774	1	Milr1	Virgin_vs_PP	CA1	0.260073
0.116786	0.116746	1	Armc8	Virgin_vs_PP	CA1	0.417925
0.133145	0.116637	1	Arhgdig	Virgin_vs_PP	CA1	0.445536
0.0131989	0.116611	1	Myl12b	Virgin_vs_PP	CA1	0.145784
0.222396	0.11661	1	Safb	Virgin_vs_PP	CA1	0.559896
0.211817	0.11649	1	Ift57	Virgin_vs_PP	CA1	0.547011
0.111391	0.116439	1	Rnasek	Virgin_vs_PP	CA1	0.408064
0.0168042	0.116426	1	Uchl5	Virgin_vs_PP	CA1	0.16375
0.0325075	0.116415	1	Pde5a	Virgin_vs_PP	CA1	0.229331
0.159257	0.116371	1	Pik3ca	Virgin_vs_PP	CA1	0.480141
0.12013	0.116233	1	Rpl35a	Virgin_vs_PP	CA1	0.422086
0.0721007	0.115968	1	Rep15	Virgin_vs_PP	CA1	0.343048
0.427029	0.115873	1	Cs	Virgin_vs_PP	CA1	0.720833
0.146891	0.115873	1	Fnta	Virgin_vs_PP	CA1	0.464078
0.246233	0.11587	1	Tbce	Virgin_vs_PP	CA1	0.582239
0.0935701	0.115687	1	Ccz1	Virgin_vs_PP	CA1	0.379237
0.0689476	0.115668	1	Dpp10	Virgin_vs_PP	CA1	0.335655
0.128572	0.115631	1	Denr	Virgin_vs_PP	CA1	0.434938
0.317537	0.115446	1	Synpr	Virgin_vs_PP	CA1	0.647757
0.176627	0.11544	1	Nras	Virgin_vs_PP	CA1	0.506273
0.123878	0.115264	1	Acaca	Virgin_vs_PP	CA1	0.428054
0.0446578	0.115219	1	Diras2	Virgin_vs_PP	CA1	0.266405
0.109891	0.114947	1	Mtif2	Virgin_vs_PP	CA1	0.405024
0.319583	0.114944	1	Sos1	Virgin_vs_PP	CA1	0.648663
0.115876	0.114912	1	Galnt11	Virgin_vs_PP	CA1	0.416192
0.0213838	0.114821	1	Adra1a	Virgin_vs_PP	CA1	0.189194
0.178306	0.114806	1	Fcho2	Virgin_vs_PP	CA1	0.508853
0.0480473	0.114791	1	Gm38393	Virgin_vs_PP	CA1	0.27788
0.080493	0.114773	1	Kcnb2	Virgin_vs_PP	CA1	0.358723
0.23716	0.114598	1	Arfgef2	Virgin_vs_PP	CA1	0.573242
0.00199293	0.114579	1	Zdhhc3	Virgin_vs_PP	CA1	0.0435334
0.168373	0.11451	1	Mfap3	Virgin_vs_PP	CA1	0.492328
0.136673	0.114394	1	Pds5a	Virgin_vs_PP	CA1	0.448155
0.302087	0.11432	1	Taf1	Virgin_vs_PP	CA1	0.635297
0.10492	0.114006	1	Atp1a1	Virgin_vs_PP	CA1	0.398473
0.066646	0.113797	1	Atp5g1	Virgin_vs_PP	CA1	0.329362
0.0213728	0.113693	1	Gm42669	Virgin_vs_PP	CA1	0.189194
0.0840557	0.113649	1	Zdhhc21	Virgin_vs_PP	CA1	0.363981
0.0758807	0.113565	1	Slc22a15	Virgin_vs_PP	CA1	0.350256
0.113983	0.113419	1	Nrbp2	Virgin_vs_PP	CA1	0.412163
0.0689166	0.113407	1	Cobl	Virgin_vs_PP	CA1	0.335655
0.191555	0.113143	1	Cep44	Virgin_vs_PP	CA1	0.526217
0.340769	0.113141	1	Chfr	Virgin_vs_PP	CA1	0.666572
0.319228	0.113116	1	Hs2st1	Virgin_vs_PP	CA1	0.648663
0.142037	0.112874	1	Atp8b2	Virgin_vs_PP	CA1	0.455692
0.162294	0.112695	1	Gad1	Virgin_vs_PP	CA1	0.483981
0.0795237	0.112632	1	Dtnbos	Virgin_vs_PP	CA1	0.357054
0.342041	0.11261	1	Mrps25	Virgin_vs_PP	CA1	0.66794
0.201707	0.112572	1	Rbbp5	Virgin_vs_PP	CA1	0.535819
0.179796	0.112483	1	Stxbp6	Virgin_vs_PP	CA1	0.510132
0.101554	0.112303	1	Rgl2	Virgin_vs_PP	CA1	0.391556
0.0769295	0.112145	1	Rnasel	Virgin_vs_PP	CA1	0.352604
0.161902	0.112016	1	Churc1	Virgin_vs_PP	CA1	0.483981
0.217515	0.111836	1	Tmem135	Virgin_vs_PP	CA1	0.553537
0.035337	0.111806	1	Abcb8	Virgin_vs_PP	CA1	0.239974
0.0906682	0.11165	1	Rdh12	Virgin_vs_PP	CA1	0.375129
0.147	0.111619	1	Rhoa	Virgin_vs_PP	CA1	0.464078
0.0238049	0.111453	1	Pkib	Virgin_vs_PP	CA1	0.198127
0.1199	0.111404	1	Snap23	Virgin_vs_PP	CA1	0.421623
0.383332	0.111401	1	Pik3ip1	Virgin_vs_PP	CA1	0.69386
0.203694	0.111328	1	Adgra1	Virgin_vs_PP	CA1	0.537532
0.0409452	0.111269	1	Wdr34	Virgin_vs_PP	CA1	0.25732
0.0438429	0.11105	1	Slc48a1	Virgin_vs_PP	CA1	0.264498
0.00963713	0.110966	1	Lsg1	Virgin_vs_PP	CA1	0.118966
0.134185	0.110851	1	Slc35b1	Virgin_vs_PP	CA1	0.446498
0.153147	0.110786	1	Mrpl42	Virgin_vs_PP	CA1	0.472473
0.085352	0.110725	1	Ttc3	Virgin_vs_PP	CA1	0.365025
0.126406	0.1107	1	Slc35a3	Virgin_vs_PP	CA1	0.431587
0.0142224	0.110687	1	Mtfmt	Virgin_vs_PP	CA1	0.152027
0.100149	0.110629	1	Chuk	Virgin_vs_PP	CA1	0.389824
0.077258	0.11038	1	Chmp2b	Virgin_vs_PP	CA1	0.352928
0.11385	0.110237	1	Gm26822	Virgin_vs_PP	CA1	0.412163
0.0162322	0.110197	1	Snhg14	Virgin_vs_PP	CA1	0.161936
0.103871	0.109977	1	Tulp4	Virgin_vs_PP	CA1	0.395461
0.157474	0.109942	1	Rhou	Virgin_vs_PP	CA1	0.477561
0.000728192	0.109926	1	Zfp942	Virgin_vs_PP	CA1	0.0203152
0.0150111	0.109814	1	Cx3cl1	Virgin_vs_PP	CA1	0.155736
0.613058	0.109762	1	Mrps14	Virgin_vs_PP	CA1	0.835807
0.204152	0.109713	1	Purg	Virgin_vs_PP	CA1	0.537935
0.102856	0.10965	1	Abcc5	Virgin_vs_PP	CA1	0.393564
0.202385	0.109602	1	Lrrc16a	Virgin_vs_PP	CA1	0.536506
0.190175	0.109583	1	Dtx3	Virgin_vs_PP	CA1	0.524795
0.356953	0.109536	1	Bcr	Virgin_vs_PP	CA1	0.678794
0.0896252	0.109397	1	Trpv2	Virgin_vs_PP	CA1	0.372485
0.386464	0.109312	1	Tmtc1	Virgin_vs_PP	CA1	0.694667
0.393362	0.108782	1	Aida	Virgin_vs_PP	CA1	0.698306
0.141728	0.10874	1	Ccnt1	Virgin_vs_PP	CA1	0.455692
0.108725	0.108642	1	BC026585	Virgin_vs_PP	CA1	0.40365
0.105334	0.108373	1	Tspan15	Virgin_vs_PP	CA1	0.398804
0.0205927	0.108329	1	Spc24	Virgin_vs_PP	CA1	0.185872
0.21641	0.108319	1	Mecp2	Virgin_vs_PP	CA1	0.553013
0.217741	0.108264	1	Khdrbs2	Virgin_vs_PP	CA1	0.553873
0.15925	0.108122	1	Llph	Virgin_vs_PP	CA1	0.480141
0.060566	0.108088	1	Ms4a4b	Virgin_vs_PP	CA1	0.311907
0.407122	0.108056	1	Gosr2	Virgin_vs_PP	CA1	0.707833
0.249044	0.107905	1	Cggbp1	Virgin_vs_PP	CA1	0.584886
0.0784558	0.107814	1	Cox5b	Virgin_vs_PP	CA1	0.354075
0.102333	0.107697	1	Crtc3	Virgin_vs_PP	CA1	0.392751
0.377292	0.107331	1	Zfyve16	Virgin_vs_PP	CA1	0.693325
0.22312	0.107319	1	Clpx	Virgin_vs_PP	CA1	0.560998
0.233593	0.107292	1	Sgpp1	Virgin_vs_PP	CA1	0.568361
0.111763	0.107233	1	Nlgn2	Virgin_vs_PP	CA1	0.408531
0.217078	0.107105	1	Clmn	Virgin_vs_PP	CA1	0.553314
0.194243	0.106981	1	Lamp2	Virgin_vs_PP	CA1	0.527786
0.35526	0.106839	1	Xiap	Virgin_vs_PP	CA1	0.677956
0.153818	0.106744	1	Rplp0	Virgin_vs_PP	CA1	0.472963
0.118669	0.106582	1	Mbtps2	Virgin_vs_PP	CA1	0.42082
0.270176	0.106518	1	Id2	Virgin_vs_PP	CA1	0.606862
0.2488	0.106466	1	Tbc1d19	Virgin_vs_PP	CA1	0.584547
0.139259	0.106254	1	Fzr1	Virgin_vs_PP	CA1	0.452341
0.214365	0.106222	1	Rabgap1	Virgin_vs_PP	CA1	0.551011
0.0704475	0.106153	1	Tmco1	Virgin_vs_PP	CA1	0.339297
0.0987003	0.106106	1	Nfat5	Virgin_vs_PP	CA1	0.387566
0.147058	0.106078	1	Dexi	Virgin_vs_PP	CA1	0.464078
0.0492752	0.106023	1	Dgcr2	Virgin_vs_PP	CA1	0.27975
0.0969868	0.106015	1	Psmd9	Virgin_vs_PP	CA1	0.385585
0.135964	0.105915	1	Brd3	Virgin_vs_PP	CA1	0.447966
0.13433	0.105653	1	Sel1l3	Virgin_vs_PP	CA1	0.446498
0.0693167	0.10561	1	Mgat1	Virgin_vs_PP	CA1	0.335781
0.206083	0.105488	1	Ntrk2	Virgin_vs_PP	CA1	0.541084
0.0430724	0.105473	1	Spag7	Virgin_vs_PP	CA1	0.263828
0.258729	0.105311	1	Asap2	Virgin_vs_PP	CA1	0.596192
0.161703	0.105258	1	Dvl3	Virgin_vs_PP	CA1	0.483791
0.0018866	0.105233	1	Arpp21	Virgin_vs_PP	CA1	0.042003
0.228089	0.105233	1	Paqr8	Virgin_vs_PP	CA1	0.564669
0.08744	0.105219	1	Hgsnat	Virgin_vs_PP	CA1	0.369083
0.0889734	0.105125	1	Atpaf2	Virgin_vs_PP	CA1	0.371636
0.143971	0.105044	1	Ubxn7	Virgin_vs_PP	CA1	0.458549
0.124696	0.105017	1	Chchd1	Virgin_vs_PP	CA1	0.429744
0.107321	0.104924	1	Aqp11	Virgin_vs_PP	CA1	0.402751
0.383432	0.104889	1	Gabra3	Virgin_vs_PP	CA1	0.69386
0.077541	0.104833	1	Gfod1	Virgin_vs_PP	CA1	0.352928
0.137247	0.104766	1	Dixdc1	Virgin_vs_PP	CA1	0.449034
0.000213502	0.104761	1	Rian	Virgin_vs_PP	CA1	0.0079401
0.232404	0.104759	1	Vopp1	Virgin_vs_PP	CA1	0.568026
0.389373	0.10469	1	Tmtc3	Virgin_vs_PP	CA1	0.696577
0.1579	0.104388	1	Tnk2	Virgin_vs_PP	CA1	0.478248
0.373559	0.104366	1	Fnbp1	Virgin_vs_PP	CA1	0.690913
0.0477175	0.10427	1	Ghdc	Virgin_vs_PP	CA1	0.277524
0.215768	0.104255	1	Trove2	Virgin_vs_PP	CA1	0.552479
0.121629	0.104241	1	Slc25a33	Virgin_vs_PP	CA1	0.424553
0.118161	0.104239	1	Fbxl20	Virgin_vs_PP	CA1	0.420033
0.258027	0.104125	1	Ptprj	Virgin_vs_PP	CA1	0.595848
0.116729	0.104062	1	Poldip2	Virgin_vs_PP	CA1	0.417925
0.0489593	0.103785	1	Dimt1	Virgin_vs_PP	CA1	0.279536
0.141891	0.103678	1	Igsf8	Virgin_vs_PP	CA1	0.455692
0.199965	0.10365	1	Rer1	Virgin_vs_PP	CA1	0.535061
0.0126841	0.103632	1	Scn1b	Virgin_vs_PP	CA1	0.141758
0.208947	0.103565	1	Clstn3	Virgin_vs_PP	CA1	0.544683
0.167513	0.103517	1	Cdc26	Virgin_vs_PP	CA1	0.490695
0.160351	0.103514	1	Rasa3	Virgin_vs_PP	CA1	0.481955
0.0358269	0.103488	1	Tvp23b	Virgin_vs_PP	CA1	0.241144
0.31254	0.103465	1	Dcaf17	Virgin_vs_PP	CA1	0.644429
0.0418377	0.103414	1	Cd99l2	Virgin_vs_PP	CA1	0.260073
0.310918	0.103085	1	Mfn2	Virgin_vs_PP	CA1	0.643293
0.167076	0.103043	1	Cyth3	Virgin_vs_PP	CA1	0.490695
0.0783205	0.102921	1	C920009B18Rik	Virgin_vs_PP	CA1	0.353737
0.178157	0.10289	1	Gm10827	Virgin_vs_PP	CA1	0.508674
0.174291	0.102768	1	Pxk	Virgin_vs_PP	CA1	0.502519
0.288864	0.102629	1	Ppm1l	Virgin_vs_PP	CA1	0.622696
0.199016	0.102567	1	Kif5c	Virgin_vs_PP	CA1	0.534807
0.166349	0.102493	1	Dcun1d2	Virgin_vs_PP	CA1	0.490009
0.026397	0.102353	1	D630045J12Rik	Virgin_vs_PP	CA1	0.209886
0.143152	0.102156	1	Stxbp4	Virgin_vs_PP	CA1	0.457152
0.161209	0.1021	1	Ddx42	Virgin_vs_PP	CA1	0.48305
0.101548	0.102092	1	Mrpl9	Virgin_vs_PP	CA1	0.391556
0.406149	0.102063	1	Tpp1	Virgin_vs_PP	CA1	0.707662
0.0808286	0.10205	1	Ocstamp	Virgin_vs_PP	CA1	0.358723
0.148546	0.101927	1	Eml1	Virgin_vs_PP	CA1	0.465554
0.15352	0.101884	1	Miat	Virgin_vs_PP	CA1	0.472473
0.119355	0.101777	1	Smc1a	Virgin_vs_PP	CA1	0.421218
0.0896312	0.101742	1	Tagln3	Virgin_vs_PP	CA1	0.372485
0.259226	0.101623	1	Ap4e1	Virgin_vs_PP	CA1	0.596295
0.432579	0.101619	1	Fam177a	Virgin_vs_PP	CA1	0.72515
0.0464671	0.101612	1	Cacna2d3	Virgin_vs_PP	CA1	0.272967
0.192905	0.101541	1	Vti1b	Virgin_vs_PP	CA1	0.527213
0.253741	0.101465	1	Tc2n	Virgin_vs_PP	CA1	0.590487
0.156047	0.101439	1	Tbl1x	Virgin_vs_PP	CA1	0.476082
0.244648	0.101409	1	Crtac1	Virgin_vs_PP	CA1	0.580594
0.1338	0.10126	1	Dgke	Virgin_vs_PP	CA1	0.446253
0.38263	0.101196	1	Pou2f1	Virgin_vs_PP	CA1	0.69386
0.247708	0.101083	1	Flrt3	Virgin_vs_PP	CA1	0.582898
0.199562	0.101036	1	Gstm1	Virgin_vs_PP	CA1	0.534815
0.175264	0.100948	1	Raf1	Virgin_vs_PP	CA1	0.503945
0.0313915	0.100945	1	Cnot3	Virgin_vs_PP	CA1	0.225444
0.0416869	0.100628	1	Agbl3	Virgin_vs_PP	CA1	0.259758
0.0507878	0.100493	1	Grik4	Virgin_vs_PP	CA1	0.285852
0.136347	0.100455	1	Mfsd11	Virgin_vs_PP	CA1	0.447966
0.099934	0.100413	1	B930095G15Rik	Virgin_vs_PP	CA1	0.389824
0.386298	0.100405	1	Herpud2	Virgin_vs_PP	CA1	0.694667
0.0859871	0.100315	1	Lpin1	Virgin_vs_PP	CA1	0.36613
0.203496	0.100279	1	P4hb	Virgin_vs_PP	CA1	0.537532
0.108931	0.100275	1	Clstn1	Virgin_vs_PP	CA1	0.40365
0.0460025	0.100271	1	Lrp8	Virgin_vs_PP	CA1	0.270852
0.365468	0.100166	1	Mga	Virgin_vs_PP	CA1	0.683696
0.484428	0.0999923	1	Lrch2	Virgin_vs_PP	CA1	0.760893
0.073602	0.0999582	1	Clptm1	Virgin_vs_PP	CA1	0.345435
0.108838	0.099871	1	Dnm3	Virgin_vs_PP	CA1	0.40365
0.139658	0.0996323	1	Ms4a6c	Virgin_vs_PP	CA1	0.453387
0.0269767	0.0996152	1	Atf7ip	Virgin_vs_PP	CA1	0.211354
0.0846667	0.0995498	1	Lmna	Virgin_vs_PP	CA1	0.364912
0.169457	0.0995279	1	Adipor2	Virgin_vs_PP	CA1	0.494159
0.130127	0.099509	1	Psmd2	Virgin_vs_PP	CA1	0.437793
0.24536	0.0993546	1	Sdccag8	Virgin_vs_PP	CA1	0.580878
0.140924	0.0992924	1	Ddx24	Virgin_vs_PP	CA1	0.455576
0.382268	0.0992424	1	Kansl3	Virgin_vs_PP	CA1	0.69386
0.142354	0.099212	1	Galnt14	Virgin_vs_PP	CA1	0.456092
0.148012	0.0991913	1	Sod1	Virgin_vs_PP	CA1	0.464594
0.117386	0.0990387	1	Mtss1l	Virgin_vs_PP	CA1	0.418834
0.191978	0.0989656	1	Bri3bp	Virgin_vs_PP	CA1	0.526272
0.201665	0.0988293	1	l7Rn6	Virgin_vs_PP	CA1	0.535819
0.295832	0.0986647	1	Kdm5c	Virgin_vs_PP	CA1	0.628396
0.122443	0.098503	1	Tmem50a	Virgin_vs_PP	CA1	0.425692
0.0160583	0.0984379	1	Htt	Virgin_vs_PP	CA1	0.160474
0.206352	0.0984169	1	Scin	Virgin_vs_PP	CA1	0.541238
0.156987	0.0982072	1	Fgfr1	Virgin_vs_PP	CA1	0.477062
0.0378414	0.0980828	1	Fam19a2	Virgin_vs_PP	CA1	0.24599
0.229465	0.0979657	1	Zfas1	Virgin_vs_PP	CA1	0.56629
0.142002	0.0979471	1	Ptprr	Virgin_vs_PP	CA1	0.455692
0.19327	0.0978999	1	Sgta	Virgin_vs_PP	CA1	0.527231
0.0913951	0.0978321	1	Klc2	Virgin_vs_PP	CA1	0.37634
0.211657	0.0977905	1	Mrpl13	Virgin_vs_PP	CA1	0.547011
0.294441	0.0977577	1	Usp1	Virgin_vs_PP	CA1	0.627314
0.115688	0.0977127	1	Polr3k	Virgin_vs_PP	CA1	0.416024
0.574415	0.0976868	1	Nuak1	Virgin_vs_PP	CA1	0.812029
0.217175	0.0975997	1	Jam3	Virgin_vs_PP	CA1	0.553314
0.199803	0.0975189	1	Gm10660	Virgin_vs_PP	CA1	0.534873
0.279147	0.0975094	1	Stk16	Virgin_vs_PP	CA1	0.614792
0.00634969	0.0974128	1	Rpl24	Virgin_vs_PP	CA1	0.0949384
0.194143	0.0973166	1	Me1	Virgin_vs_PP	CA1	0.527786
0.0445001	0.0972777	1	Cdk2ap1	Virgin_vs_PP	CA1	0.266019
0.120191	0.0972751	1	Arhgap20	Virgin_vs_PP	CA1	0.422086
0.312942	0.0972365	1	Smim7	Virgin_vs_PP	CA1	0.644429
0.17084	0.0971697	1	2010109I03Rik	Virgin_vs_PP	CA1	0.496162
0.143262	0.0971577	1	Sirt3	Virgin_vs_PP	CA1	0.457167
0.30242	0.0971152	1	Tmem132a	Virgin_vs_PP	CA1	0.635328
0.268585	0.0968684	1	Cep57l1	Virgin_vs_PP	CA1	0.605045
0.304445	0.0967435	1	Os9	Virgin_vs_PP	CA1	0.635975
0.182071	0.0967402	1	Ppp2cb	Virgin_vs_PP	CA1	0.514598
0.178954	0.0967021	1	Tmem191c	Virgin_vs_PP	CA1	0.509218
0.389965	0.0966833	1	Ttc19	Virgin_vs_PP	CA1	0.696577
0.0644215	0.0966801	1	Mgat2	Virgin_vs_PP	CA1	0.323539
0.17408	0.0966609	1	Pex5	Virgin_vs_PP	CA1	0.502157
0.0851707	0.0965275	1	Mis18bp1	Virgin_vs_PP	CA1	0.365025
0.207802	0.0965142	1	Numa1	Virgin_vs_PP	CA1	0.54385
0.17123	0.0964567	1	Pik3c2a	Virgin_vs_PP	CA1	0.496398
0.162237	0.0964424	1	Sirt7	Virgin_vs_PP	CA1	0.483981
0.0596822	0.0962786	1	Hspa8	Virgin_vs_PP	CA1	0.30898
0.246522	0.0961826	1	Scg3	Virgin_vs_PP	CA1	0.582369
0.129227	0.0960873	1	Wdr31	Virgin_vs_PP	CA1	0.435528
0.317477	0.0960332	1	Pmpca	Virgin_vs_PP	CA1	0.647757
0.227167	0.0960227	1	Cyb5r4	Virgin_vs_PP	CA1	0.564651
0.11607	0.0958217	1	Fxyd6	Virgin_vs_PP	CA1	0.416379
0.310427	0.0957345	1	Iqsec3	Virgin_vs_PP	CA1	0.64273
0.0930264	0.0955682	1	C2cd3	Virgin_vs_PP	CA1	0.378548
0.136215	0.0955444	1	Slc26a2	Virgin_vs_PP	CA1	0.447966
0.227659	0.0955061	1	Pttg1ip	Virgin_vs_PP	CA1	0.564669
0.109125	0.0953902	1	B4galt6	Virgin_vs_PP	CA1	0.40365
0.50743	0.0953619	1	Amy1	Virgin_vs_PP	CA1	0.775366
0.273176	0.0952644	1	Cnn3	Virgin_vs_PP	CA1	0.609409
0.276055	0.0950867	1	Gad2	Virgin_vs_PP	CA1	0.611883
0.324552	0.0949171	1	Prdx1	Virgin_vs_PP	CA1	0.652212
0.0819797	0.0948677	1	Paip2b	Virgin_vs_PP	CA1	0.361375
0.115647	0.0947782	1	Psma3	Virgin_vs_PP	CA1	0.416024
0.167789	0.0947753	1	Fxn	Virgin_vs_PP	CA1	0.491244
0.441516	0.0947488	1	Cramp1l	Virgin_vs_PP	CA1	0.731214
0.258904	0.0947207	1	Lamtor5	Virgin_vs_PP	CA1	0.596295
0.200419	0.0945805	1	Clcn7	Virgin_vs_PP	CA1	0.535114
0.362167	0.094372	1	Mat2b	Virgin_vs_PP	CA1	0.679901
0.297763	0.0943292	1	Abcb4	Virgin_vs_PP	CA1	0.630479
0.222395	0.0941889	1	Rpl12	Virgin_vs_PP	CA1	0.559896
0.0949819	0.0940013	1	Psmc2	Virgin_vs_PP	CA1	0.380705
0.129991	0.0939263	1	Ssh2	Virgin_vs_PP	CA1	0.437723
0.388664	0.093828	1	Selk	Virgin_vs_PP	CA1	0.696064
0.335523	0.0938157	1	Camk2g	Virgin_vs_PP	CA1	0.662267
0.438439	0.093792	1	Atg12	Virgin_vs_PP	CA1	0.728356
0.164479	0.0937636	1	Smyd4	Virgin_vs_PP	CA1	0.48689
0.102346	0.0937312	1	Tmem55b	Virgin_vs_PP	CA1	0.392751
0.289497	0.0936836	1	Srebf2	Virgin_vs_PP	CA1	0.623235
0.15158	0.0935381	1	Ttc13	Virgin_vs_PP	CA1	0.469955
0.377364	0.0935113	1	Ctnnbip1	Virgin_vs_PP	CA1	0.693325
0.083703	0.0934692	1	Olfr56	Virgin_vs_PP	CA1	0.363929
0.28719	0.0933717	1	Asap1	Virgin_vs_PP	CA1	0.622365
0.191962	0.093271	1	Abcb7	Virgin_vs_PP	CA1	0.526272
0.273105	0.0932603	1	Ntm	Virgin_vs_PP	CA1	0.609409
0.184606	0.0932573	1	Ppp2r5a	Virgin_vs_PP	CA1	0.519016
0.276774	0.0932539	1	Dynlt1c	Virgin_vs_PP	CA1	0.61232
0.366665	0.0931536	1	Rpn2	Virgin_vs_PP	CA1	0.685474
0.10821	0.0930089	1	Rhox8	Virgin_vs_PP	CA1	0.40365
0.261403	0.0929666	1	Ostc	Virgin_vs_PP	CA1	0.598545
0.136516	0.0928396	1	Tbp	Virgin_vs_PP	CA1	0.447966
0.304648	0.0928139	1	Yipf6	Virgin_vs_PP	CA1	0.635975
0.162911	0.0927148	1	L1cam	Virgin_vs_PP	CA1	0.48492
0.167123	0.0925663	1	Rpl41	Virgin_vs_PP	CA1	0.490695
0.302296	0.0925572	1	Kcnh3	Virgin_vs_PP	CA1	0.635297
0.187295	0.0925108	1	Cdkl4	Virgin_vs_PP	CA1	0.522356
0.0653152	0.09251	1	Mat2a	Virgin_vs_PP	CA1	0.325764
0.141692	0.0924662	1	Galnt1	Virgin_vs_PP	CA1	0.455692
0.473023	0.0924021	1	Mtfr1l	Virgin_vs_PP	CA1	0.751103
0.0707972	0.0923195	1	Atp5g2	Virgin_vs_PP	CA1	0.339319
0.180013	0.0922864	1	Ints2	Virgin_vs_PP	CA1	0.510254
0.203521	0.0921377	1	Unc50	Virgin_vs_PP	CA1	0.537532
0.107536	0.0919714	1	Plaa	Virgin_vs_PP	CA1	0.403242
0.384698	0.0919504	1	Gpcpd1	Virgin_vs_PP	CA1	0.69386
0.232006	0.0918466	1	Dopey1	Virgin_vs_PP	CA1	0.567791
0.399904	0.0917892	1	Cldnd1	Virgin_vs_PP	CA1	0.70397
0.24508	0.0917199	1	Abca3	Virgin_vs_PP	CA1	0.580878
0.228818	0.0913405	1	Pbx1	Virgin_vs_PP	CA1	0.56564
0.475006	0.0913217	1	Acvr1b	Virgin_vs_PP	CA1	0.752819
0.0382324	0.0912116	1	Syt11	Virgin_vs_PP	CA1	0.246601
0.204925	0.0911303	1	Soat2	Virgin_vs_PP	CA1	0.539248
4.46685e-05	0.0910551	1	Xist	Virgin_vs_PP	CA1	0.00224335
0.383512	0.0910392	1	Mapre1	Virgin_vs_PP	CA1	0.69386
0.112183	0.0910177	1	Hdac4	Virgin_vs_PP	CA1	0.408926
0.196813	0.0910078	1	Iscu	Virgin_vs_PP	CA1	0.531589
0.203054	0.0909393	1	Ndufv3	Virgin_vs_PP	CA1	0.53721
0.150469	0.0908959	1	Rpl29	Virgin_vs_PP	CA1	0.468055
0.229023	0.0908875	1	Smg9	Virgin_vs_PP	CA1	0.565674
0.0274705	0.0908812	1	Fgd4	Virgin_vs_PP	CA1	0.213089
0.367756	0.0907219	1	Zcrb1	Virgin_vs_PP	CA1	0.686209
0.443606	0.0906252	1	Emb	Virgin_vs_PP	CA1	0.732546
0.2623	0.0905637	1	Csnk1e	Virgin_vs_PP	CA1	0.598552
0.171239	0.0903603	1	Zbtb4	Virgin_vs_PP	CA1	0.496398
0.262106	0.0903155	1	Rab11b	Virgin_vs_PP	CA1	0.598545
0.0973476	0.0902605	1	Rps3	Virgin_vs_PP	CA1	0.385975
0.155332	0.0902047	1	Zfp704	Virgin_vs_PP	CA1	0.474822
0.0163319	0.0899263	1	Prkcz	Virgin_vs_PP	CA1	0.162441
0.34093	0.0899163	1	Grm7	Virgin_vs_PP	CA1	0.666657
0.508347	0.089862	1	Ttc17	Virgin_vs_PP	CA1	0.775655
0.264741	0.0898345	1	Tmem33	Virgin_vs_PP	CA1	0.599847
0.125118	0.0898076	1	Terf2ip	Virgin_vs_PP	CA1	0.430168
0.305411	0.0898052	1	Syt13	Virgin_vs_PP	CA1	0.636447
0.421123	0.0897067	1	Prkab2	Virgin_vs_PP	CA1	0.717045
0.316646	0.0896957	1	Osbpl1a	Virgin_vs_PP	CA1	0.647394
0.173409	0.0896915	1	Tbc1d24	Virgin_vs_PP	CA1	0.500468
0.149791	0.0896393	1	Clk3	Virgin_vs_PP	CA1	0.467432
0.230903	0.0896074	1	Scamp3	Virgin_vs_PP	CA1	0.566745
0.258072	0.0895584	1	Synj2	Virgin_vs_PP	CA1	0.595848
0.395411	0.0895076	1	Srpr	Virgin_vs_PP	CA1	0.700046
0.230075	0.0895055	1	Park7	Virgin_vs_PP	CA1	0.566692
0.316395	0.0894523	1	Cryzl1	Virgin_vs_PP	CA1	0.647326
0.384965	0.0893437	1	Lgalsl	Virgin_vs_PP	CA1	0.69386
0.172041	0.0892534	1	Phax	Virgin_vs_PP	CA1	0.498231
0.288392	0.0890936	1	Tpd52l2	Virgin_vs_PP	CA1	0.622553
0.241717	0.089033	1	Kcnc1	Virgin_vs_PP	CA1	0.57784
0.521534	0.0890307	1	Tmem255a	Virgin_vs_PP	CA1	0.782768
0.284576	0.089008	1	Pde4a	Virgin_vs_PP	CA1	0.620603
0.335891	0.088994	1	Htr2c	Virgin_vs_PP	CA1	0.662267
0.450711	0.0888951	1	Plekha7	Virgin_vs_PP	CA1	0.738327
0.0686403	0.0887336	1	Aak1	Virgin_vs_PP	CA1	0.335299
0.234377	0.0887025	1	Klf13	Virgin_vs_PP	CA1	0.569092
0.126299	0.0886988	1	Atp6v0e	Virgin_vs_PP	CA1	0.431473
0.0620111	0.0884922	1	Bace1	Virgin_vs_PP	CA1	0.31685
0.0791001	0.0884309	1	B2m	Virgin_vs_PP	CA1	0.35589
0.00116825	0.088353	1	Odc1	Virgin_vs_PP	CA1	0.0290876
0.374262	0.0883448	1	Homer2	Virgin_vs_PP	CA1	0.691281
0.320578	0.0882811	1	Ppp6r1	Virgin_vs_PP	CA1	0.648663
0.186992	0.0881921	1	Sh3bp1	Virgin_vs_PP	CA1	0.522356
0.417176	0.0881565	1	Mfsd4a	Virgin_vs_PP	CA1	0.713816
0.196288	0.0881374	1	Cep162	Virgin_vs_PP	CA1	0.531271
0.246946	0.0880637	1	Pip5k1c	Virgin_vs_PP	CA1	0.582444
0.134628	0.0880377	1	Rpl37a	Virgin_vs_PP	CA1	0.446498
0.124286	0.0879859	1	Gm21967	Virgin_vs_PP	CA1	0.428581
0.143763	0.0876861	1	Acp6	Virgin_vs_PP	CA1	0.458358
0.230251	0.0876017	1	B230217C12Rik	Virgin_vs_PP	CA1	0.566692
0.27876	0.0874835	1	Ctbp1	Virgin_vs_PP	CA1	0.614633
0.569394	0.0874199	1	Rnf6	Virgin_vs_PP	CA1	0.81059
0.362149	0.0872979	1	Cbl	Virgin_vs_PP	CA1	0.679901
0.237777	0.0872443	1	Pde2a	Virgin_vs_PP	CA1	0.573789
0.447313	0.0871491	1	Mrps17	Virgin_vs_PP	CA1	0.735837
0.0264322	0.0870633	1	Tor1b	Virgin_vs_PP	CA1	0.209886
0.137529	0.0869651	1	Rps15a	Virgin_vs_PP	CA1	0.449706
0.181466	0.0868981	1	Emc2	Virgin_vs_PP	CA1	0.513275
0.27992	0.0868867	1	Lztr1	Virgin_vs_PP	CA1	0.615442
0.342661	0.0868523	1	Rab5c	Virgin_vs_PP	CA1	0.668354
0.198389	0.0867994	1	Epha5	Virgin_vs_PP	CA1	0.534004
0.29978	0.0867476	1	Nadk	Virgin_vs_PP	CA1	0.633303
0.441733	0.0866113	1	Ing4	Virgin_vs_PP	CA1	0.731215
0.27388	0.0866047	1	Gabra4	Virgin_vs_PP	CA1	0.609926
0.136148	0.0864955	1	Pcdhga12	Virgin_vs_PP	CA1	0.447966
0.183123	0.0864133	1	Gtf2b	Virgin_vs_PP	CA1	0.515588
0.326832	0.0861717	1	Nt5dc3	Virgin_vs_PP	CA1	0.653749
0.122458	0.086144	1	Ndel1	Virgin_vs_PP	CA1	0.425692
0.239608	0.0860648	1	Adcyap1r1	Virgin_vs_PP	CA1	0.576314
0.464845	0.0858754	1	Mbd1	Virgin_vs_PP	CA1	0.747108
0.11662	0.0856821	1	Myef2	Virgin_vs_PP	CA1	0.417841
0.465246	0.0856398	1	Prkacb	Virgin_vs_PP	CA1	0.747301
0.216534	0.0856131	1	Lrba	Virgin_vs_PP	CA1	0.553013
0.687467	0.0855823	1	Sema6d	Virgin_vs_PP	CA1	0.868535
0.0340931	0.0855704	1	Pink1	Virgin_vs_PP	CA1	0.236374
0.46694	0.0854439	1	Tmx3	Virgin_vs_PP	CA1	0.748989
0.457602	0.0853886	1	Pde8b	Virgin_vs_PP	CA1	0.742757
0.0971183	0.0853055	1	Paxip1	Virgin_vs_PP	CA1	0.385586
0.35159	0.0852487	1	Sgpl1	Virgin_vs_PP	CA1	0.674837
0.0589256	0.08511	1	1700025G04Rik	Virgin_vs_PP	CA1	0.307771
0.549467	0.0850884	1	Spcs2	Virgin_vs_PP	CA1	0.799828
0.102827	0.0850585	1	Cdipt	Virgin_vs_PP	CA1	0.393564
0.194156	0.0849641	1	5330434G04Rik	Virgin_vs_PP	CA1	0.527786
0.308925	0.0846862	1	Rpl39	Virgin_vs_PP	CA1	0.641428
0.233807	0.0846741	1	Cdk5r2	Virgin_vs_PP	CA1	0.568613
0.321905	0.0845068	1	Eif3k	Virgin_vs_PP	CA1	0.649665
0.323787	0.0844333	1	Ak2	Virgin_vs_PP	CA1	0.651984
0.191219	0.0843036	1	Rpl7l1	Virgin_vs_PP	CA1	0.526217
0.446144	0.084278	1	Zdbf2	Virgin_vs_PP	CA1	0.734532
0.227161	0.0841583	1	Rps6ka2	Virgin_vs_PP	CA1	0.564651
0.27376	0.0840842	1	Kdsr	Virgin_vs_PP	CA1	0.609926
0.60309	0.0840546	1	A330023F24Rik	Virgin_vs_PP	CA1	0.831087
0.275686	0.0839256	1	3110043O21Rik	Virgin_vs_PP	CA1	0.611824
0.259064	0.0838975	1	Mcoln1	Virgin_vs_PP	CA1	0.596295
0.028901	0.0838816	1	Ppp1r15b	Virgin_vs_PP	CA1	0.218203
0.039801	0.0838064	1	Adora1	Virgin_vs_PP	CA1	0.253381
0.361754	0.0835965	1	Prdx3	Virgin_vs_PP	CA1	0.679901
0.0427527	0.0835323	1	Susd4	Virgin_vs_PP	CA1	0.262644
0.321153	0.0834544	1	Hey1	Virgin_vs_PP	CA1	0.649392
0.587892	0.083419	1	Cntnap5a	Virgin_vs_PP	CA1	0.820341
0.315771	0.0834148	1	Sppl3	Virgin_vs_PP	CA1	0.647079
0.122332	0.0834034	1	Abhd2	Virgin_vs_PP	CA1	0.425692
0.344612	0.0833834	1	Apopt1	Virgin_vs_PP	CA1	0.6689
0.755197	0.0833294	1	Prdm8	Virgin_vs_PP	CA1	0.89865
0.29462	0.0832727	1	Asna1	Virgin_vs_PP	CA1	0.627469
0.224012	0.0832211	1	Cdk13	Virgin_vs_PP	CA1	0.56228
0.123447	0.0832032	1	Lrif1	Virgin_vs_PP	CA1	0.427096
0.363667	0.0831894	1	Myl6	Virgin_vs_PP	CA1	0.681226
0.267197	0.0830639	1	Cnst	Virgin_vs_PP	CA1	0.603169
0.328678	0.0830544	1	Nol10	Virgin_vs_PP	CA1	0.655436
0.0370423	0.0830059	1	Zmat3	Virgin_vs_PP	CA1	0.243196
0.0734304	0.082998	1	Gm43740	Virgin_vs_PP	CA1	0.345044
0.242437	0.0829709	1	Plat	Virgin_vs_PP	CA1	0.57853
0.216744	0.0829024	1	Rfx7	Virgin_vs_PP	CA1	0.553013
0.327229	0.0828948	1	Eif4ebp1	Virgin_vs_PP	CA1	0.65379
0.196259	0.0828456	1	Safb2	Virgin_vs_PP	CA1	0.531271
0.350408	0.0827999	1	Tmco3	Virgin_vs_PP	CA1	0.674837
0.209586	0.0827251	1	Trub1	Virgin_vs_PP	CA1	0.544683
0.145011	0.0827125	1	Sec62	Virgin_vs_PP	CA1	0.460336
0.227938	0.0826998	1	Vps9d1	Virgin_vs_PP	CA1	0.564669
0.555086	0.0825701	1	Mtcl1	Virgin_vs_PP	CA1	0.803641
0.283141	0.0825656	1	Trim11	Virgin_vs_PP	CA1	0.618949
0.0658804	0.0824779	1	Lrig2	Virgin_vs_PP	CA1	0.327343
0.40581	0.0824262	1	March7	Virgin_vs_PP	CA1	0.707662
0.337532	0.0823688	1	Tapbpl	Virgin_vs_PP	CA1	0.662512
0.403825	0.0822863	1	Hsf2	Virgin_vs_PP	CA1	0.706652
0.274859	0.0822504	1	Med23	Virgin_vs_PP	CA1	0.611306
0.140953	0.0822311	1	Ptn	Virgin_vs_PP	CA1	0.455576
0.507954	0.0821925	1	Clasp1	Virgin_vs_PP	CA1	0.775548
0.139961	0.0820364	1	Rhot2	Virgin_vs_PP	CA1	0.453709
0.206418	0.0820103	1	Zmynd8	Virgin_vs_PP	CA1	0.541238
0.363249	0.0818868	1	Mccc1	Virgin_vs_PP	CA1	0.680845
0.137655	0.0817445	1	Prdm11	Virgin_vs_PP	CA1	0.449866
0.133914	0.0816725	1	Znrf1	Virgin_vs_PP	CA1	0.446253
0.242456	0.0816708	1	Dbf4	Virgin_vs_PP	CA1	0.57853
0.392337	0.0816637	1	Tmem72	Virgin_vs_PP	CA1	0.697946
0.370291	0.0816623	1	Dda1	Virgin_vs_PP	CA1	0.68701
0.227859	0.0816309	1	Smek2	Virgin_vs_PP	CA1	0.564669
0.0837979	0.0814765	1	Trim26	Virgin_vs_PP	CA1	0.363929
0.585108	0.081438	1	Uggt2	Virgin_vs_PP	CA1	0.817232
0.245286	0.0813902	1	Fam92a	Virgin_vs_PP	CA1	0.580878
0.351533	0.0813756	1	Sdf2	Virgin_vs_PP	CA1	0.674837
0.168674	0.0813663	1	Dlg1	Virgin_vs_PP	CA1	0.492365
0.123492	0.0811483	1	Unc5a	Virgin_vs_PP	CA1	0.427096
0.409811	0.0810833	1	Erp29	Virgin_vs_PP	CA1	0.708569
0.143078	0.0810391	1	Papolg	Virgin_vs_PP	CA1	0.457152
0.242615	0.081016	1	Tma7	Virgin_vs_PP	CA1	0.57853
0.326139	0.0809807	1	Cxxc5	Virgin_vs_PP	CA1	0.653612
0.380387	0.0809613	1	Phyh	Virgin_vs_PP	CA1	0.69386
0.399639	0.0807394	1	AI597479	Virgin_vs_PP	CA1	0.70397
0.149352	0.0806637	1	Nagk	Virgin_vs_PP	CA1	0.467011
0.272397	0.0806422	1	Ptdss1	Virgin_vs_PP	CA1	0.60905
0.103913	0.0806012	1	Taldo1	Virgin_vs_PP	CA1	0.395461
0.650301	0.0804335	1	Hipk1	Virgin_vs_PP	CA1	0.854675
0.28095	0.0802592	1	Zfp512	Virgin_vs_PP	CA1	0.616338
0.311875	0.0801921	1	Magt1	Virgin_vs_PP	CA1	0.643937
0.296291	0.0801875	1	Manea	Virgin_vs_PP	CA1	0.628396
0.147794	0.080173	1	Mdm4	Virgin_vs_PP	CA1	0.464491
0.28533	0.0801481	1	Ccni	Virgin_vs_PP	CA1	0.621376
0.211968	0.080116	1	Map3k12	Virgin_vs_PP	CA1	0.547011
0.380132	0.0800375	1	Cntn1	Virgin_vs_PP	CA1	0.69386
0.254271	0.0800099	1	Syt1	Virgin_vs_PP	CA1	0.590888
0.00799502	0.0799351	1	Dock3	Virgin_vs_PP	CA1	0.1067
0.227838	0.0799298	1	Hspe1	Virgin_vs_PP	CA1	0.564669
0.336737	0.0799098	1	Fads1	Virgin_vs_PP	CA1	0.662333
0.549044	0.079889	1	Car12	Virgin_vs_PP	CA1	0.799828
0.27814	0.0798417	1	Qdpr	Virgin_vs_PP	CA1	0.613726
0.359593	0.0798192	1	Sap18	Virgin_vs_PP	CA1	0.679629
0.309109	0.0797459	1	Pitpnc1	Virgin_vs_PP	CA1	0.641534
0.387002	0.0796559	1	Supt5	Virgin_vs_PP	CA1	0.695208
0.191497	0.0796222	1	Cadm3	Virgin_vs_PP	CA1	0.526217
0.383652	0.0794572	1	Pantr1	Virgin_vs_PP	CA1	0.69386
0.0314623	0.0794507	1	Shoc2	Virgin_vs_PP	CA1	0.225444
0.263373	0.0794085	1	Glrb	Virgin_vs_PP	CA1	0.599605
0.309762	0.0792232	1	Tmem57	Virgin_vs_PP	CA1	0.642033
0.198011	0.0791795	1	F10	Virgin_vs_PP	CA1	0.533475
0.133613	0.0791209	1	Tmod3	Virgin_vs_PP	CA1	0.446253
0.429989	0.079072	1	Dst	Virgin_vs_PP	CA1	0.723543
0.421401	0.0790223	1	Armcx3	Virgin_vs_PP	CA1	0.717102
0.0219429	0.0789582	1	Ufc1	Virgin_vs_PP	CA1	0.191229
0.0530257	0.078928	1	Ppp2r2b	Virgin_vs_PP	CA1	0.292562
0.649674	0.0788736	1	Cnep1r1	Virgin_vs_PP	CA1	0.854675
0.201071	0.0788179	1	Mrto4	Virgin_vs_PP	CA1	0.535279
0.352265	0.0787976	1	Sdhc	Virgin_vs_PP	CA1	0.675337
0.154767	0.0787784	1	Vps53	Virgin_vs_PP	CA1	0.47466
0.103708	0.0787456	1	Spire1	Virgin_vs_PP	CA1	0.395449
0.152012	0.0784557	1	Mrpl48	Virgin_vs_PP	CA1	0.470366
0.378656	0.0784086	1	Dcaf8	Virgin_vs_PP	CA1	0.69386
0.281107	0.078404	1	Atp5j	Virgin_vs_PP	CA1	0.616338
0.456404	0.0784031	1	Rora	Virgin_vs_PP	CA1	0.742683
0.48312	0.0783549	1	Rabac1	Virgin_vs_PP	CA1	0.759859
0.256444	0.0783239	1	Rps26	Virgin_vs_PP	CA1	0.593848
0.182643	0.0782315	1	Adprh	Virgin_vs_PP	CA1	0.515223
0.428031	0.0782096	1	Pnrc2	Virgin_vs_PP	CA1	0.721696
0.125077	0.0780617	1	Aig1	Virgin_vs_PP	CA1	0.430168
0.136831	0.0780503	1	Gtf3c2	Virgin_vs_PP	CA1	0.448421
0.330749	0.0780373	1	0610030E20Rik	Virgin_vs_PP	CA1	0.657767
0.447872	0.0777798	1	Rab10os	Virgin_vs_PP	CA1	0.736551
0.227454	0.0777336	1	Gpr162	Virgin_vs_PP	CA1	0.564669
0.322375	0.0776682	1	Plekhb2	Virgin_vs_PP	CA1	0.649925
0.293116	0.0770865	1	Mfap1a	Virgin_vs_PP	CA1	0.626765
0.381317	0.0768923	1	Rab9	Virgin_vs_PP	CA1	0.69386
0.245597	0.0768857	1	Eif3h	Virgin_vs_PP	CA1	0.580969
0.657961	0.0768201	1	Gm21092	Virgin_vs_PP	CA1	0.855478
0.511823	0.0767782	1	N6amt1	Virgin_vs_PP	CA1	0.77813
0.295305	0.0767557	1	Anxa6	Virgin_vs_PP	CA1	0.628175
0.402362	0.0767127	1	Vimp	Virgin_vs_PP	CA1	0.705124
0.633512	0.0766852	1	R3hdm2	Virgin_vs_PP	CA1	0.848183
0.316886	0.0766548	1	Cfl2	Virgin_vs_PP	CA1	0.647607
0.111284	0.076585	1	Vamp2	Virgin_vs_PP	CA1	0.407924
0.160605	0.0765705	1	Ubc	Virgin_vs_PP	CA1	0.482472
0.0527835	0.0765575	1	Pnisr	Virgin_vs_PP	CA1	0.291884
0.273397	0.0765381	1	Bcl7a	Virgin_vs_PP	CA1	0.609671
0.421305	0.0765305	1	Tmx2	Virgin_vs_PP	CA1	0.717102
0.439723	0.0765004	1	Oxct1	Virgin_vs_PP	CA1	0.729067
0.30453	0.0764859	1	Dnajc19	Virgin_vs_PP	CA1	0.635975
0.0986266	0.0764842	1	Atp6v0b	Virgin_vs_PP	CA1	0.387566
0.38839	0.076418	1	Hps3	Virgin_vs_PP	CA1	0.696064
0.356372	0.0763597	1	Borcs7	Virgin_vs_PP	CA1	0.678343
0.355605	0.076342	1	Psd3	Virgin_vs_PP	CA1	0.67798
0.262887	0.0762606	1	Sobp	Virgin_vs_PP	CA1	0.598963
0.248176	0.0761608	1	Arhgdia	Virgin_vs_PP	CA1	0.583432
0.519619	0.0761043	1	Dlc1	Virgin_vs_PP	CA1	0.782768
0.377697	0.0760718	1	Sox11	Virgin_vs_PP	CA1	0.693329
0.427652	0.0759745	1	Celsr3	Virgin_vs_PP	CA1	0.721265
0.296028	0.0759712	1	Mzf1	Virgin_vs_PP	CA1	0.628396
0.122307	0.0758891	1	Plppr5	Virgin_vs_PP	CA1	0.425692
0.0527789	0.0758127	1	Atxn7l3	Virgin_vs_PP	CA1	0.291884
0.253525	0.0757314	1	Kit	Virgin_vs_PP	CA1	0.590454
0.549724	0.0757237	1	Gnptg	Virgin_vs_PP	CA1	0.799828
0.377576	0.0757106	1	Lrpap1	Virgin_vs_PP	CA1	0.693325
0.775169	0.0756897	1	Map2k7	Virgin_vs_PP	CA1	0.908643
0.476221	0.0756846	1	Atxn2	Virgin_vs_PP	CA1	0.754189
0.0868787	0.0756477	1	Mmp16	Virgin_vs_PP	CA1	0.368436
0.0165576	0.0753644	1	Noct	Virgin_vs_PP	CA1	0.163098
0.331812	0.0752746	1	Rai1	Virgin_vs_PP	CA1	0.659021
0.553815	0.0752711	1	Pdss1	Virgin_vs_PP	CA1	0.802463
0.468704	0.0748469	1	Ryk	Virgin_vs_PP	CA1	0.749309
0.520539	0.0747967	1	Eif4h	Virgin_vs_PP	CA1	0.782768
0.360746	0.0747953	1	Fmnl1	Virgin_vs_PP	CA1	0.679901
0.77599	0.0747161	1	Impad1	Virgin_vs_PP	CA1	0.908643
0.460337	0.0746837	1	Ppm1g	Virgin_vs_PP	CA1	0.744993
0.609858	0.0746404	1	Ehmt1	Virgin_vs_PP	CA1	0.834348
0.160056	0.0744988	1	Tmem35	Virgin_vs_PP	CA1	0.481316
0.362121	0.074399	1	Kndc1	Virgin_vs_PP	CA1	0.679901
0.348688	0.0743852	1	Nxf1	Virgin_vs_PP	CA1	0.673092
0.286107	0.0742544	1	Ap2a1	Virgin_vs_PP	CA1	0.622109
0.268671	0.074198	1	Efr3b	Virgin_vs_PP	CA1	0.605045
0.341563	0.074092	1	Dcaf13	Virgin_vs_PP	CA1	0.667662
0.235526	0.0740567	1	Gpr158	Virgin_vs_PP	CA1	0.570936
0.579183	0.0738494	1	B3galnt2	Virgin_vs_PP	CA1	0.813258
0.558056	0.0737106	1	Zfp866	Virgin_vs_PP	CA1	0.805486
0.383154	0.0736887	1	Tpst1	Virgin_vs_PP	CA1	0.69386
0.415661	0.0734744	1	St7l	Virgin_vs_PP	CA1	0.712984
0.383815	0.0734308	1	Zbtb37	Virgin_vs_PP	CA1	0.69386
0.259999	0.0733617	1	Tmem80	Virgin_vs_PP	CA1	0.596798
0.584526	0.0733529	1	Tob1	Virgin_vs_PP	CA1	0.817081
0.291745	0.0733301	1	Atp6v0e2	Virgin_vs_PP	CA1	0.625426
0.0142936	0.0733005	1	Ap2m1	Virgin_vs_PP	CA1	0.152027
0.326986	0.0732929	1	Pdgfa	Virgin_vs_PP	CA1	0.653749
0.275931	0.0732578	1	Zfp68	Virgin_vs_PP	CA1	0.611838
0.0150586	0.0732445	1	Hlf	Virgin_vs_PP	CA1	0.155736
0.272912	0.0731821	1	Neurl1a	Virgin_vs_PP	CA1	0.609282
0.14487	0.0731431	1	Ermp1	Virgin_vs_PP	CA1	0.460139
0.390016	0.0731377	1	Cntn2	Virgin_vs_PP	CA1	0.696577
0.0629832	0.0731278	1	2610005L07Rik	Virgin_vs_PP	CA1	0.320126
0.575979	0.0731128	1	Ramp1	Virgin_vs_PP	CA1	0.812778
0.288857	0.0730159	1	Zfp397	Virgin_vs_PP	CA1	0.622696
0.500624	0.0730051	1	Stk32c	Virgin_vs_PP	CA1	0.774326
0.616715	0.072882	1	Acsl6	Virgin_vs_PP	CA1	0.836977
0.510199	0.0728762	1	Tiprl	Virgin_vs_PP	CA1	0.776866
0.0713913	0.0728415	1	Tex261	Virgin_vs_PP	CA1	0.341053
0.306439	0.0727426	1	Bcl7b	Virgin_vs_PP	CA1	0.637618
0.409875	0.0727208	1	Gm6483	Virgin_vs_PP	CA1	0.708569
0.303324	0.0726237	1	Bcl2l1	Virgin_vs_PP	CA1	0.635975
0.503016	0.0726011	1	Ythdf2	Virgin_vs_PP	CA1	0.77461
0.0145489	0.072563	1	Ap3d1	Virgin_vs_PP	CA1	0.152884
0.240864	0.0724556	1	Sept4	Virgin_vs_PP	CA1	0.576677
0.336912	0.0723384	1	Ftsj1	Virgin_vs_PP	CA1	0.662333
0.0155779	0.0721879	1	9530068E07Rik	Virgin_vs_PP	CA1	0.158367
0.26789	0.0721821	1	Dmxl2	Virgin_vs_PP	CA1	0.604038
0.36167	0.0720574	1	Smim19	Virgin_vs_PP	CA1	0.679901
0.0348377	0.0720285	1	1810041L15Rik	Virgin_vs_PP	CA1	0.237902
0.32669	0.0719917	1	Mib1	Virgin_vs_PP	CA1	0.653749
0.218274	0.0718939	1	Stmn2	Virgin_vs_PP	CA1	0.554358
0.3765	0.0718868	1	Nrxn2	Virgin_vs_PP	CA1	0.692863
0.342657	0.0718375	1	Prkrir	Virgin_vs_PP	CA1	0.668354
0.509789	0.0718222	1	Sec11c	Virgin_vs_PP	CA1	0.776866
0.138214	0.0717138	1	Fbxo32	Virgin_vs_PP	CA1	0.450941
0.259087	0.0717072	1	Cox4i1	Virgin_vs_PP	CA1	0.596295
0.287554	0.0716689	1	Rps24	Virgin_vs_PP	CA1	0.622553
0.492446	0.0714935	1	Txndc16	Virgin_vs_PP	CA1	0.768333
0.312919	0.0714585	1	Rgs11	Virgin_vs_PP	CA1	0.644429
0.417526	0.0714108	1	Patl1	Virgin_vs_PP	CA1	0.713816
0.194542	0.0713418	1	Nell1	Virgin_vs_PP	CA1	0.528248
0.0476653	0.0712843	1	Uqcrq	Virgin_vs_PP	CA1	0.277524
0.40435	0.0712538	1	Shfm1	Virgin_vs_PP	CA1	0.707341
0.0253569	0.0712056	1	Ppp1r7	Virgin_vs_PP	CA1	0.204398
0.380072	0.071141	1	Rsrc1	Virgin_vs_PP	CA1	0.69386
0.251524	0.0709414	1	Nomo1	Virgin_vs_PP	CA1	0.587582
0.047966	0.0708512	1	Pex7	Virgin_vs_PP	CA1	0.27788
0.55541	0.0707646	1	Pomgnt1	Virgin_vs_PP	CA1	0.803641
0.485573	0.0707165	1	Gpx4	Virgin_vs_PP	CA1	0.761876
0.259281	0.0707088	1	Ddx17	Virgin_vs_PP	CA1	0.596295
0.502286	0.0705644	1	Lrrtm2	Virgin_vs_PP	CA1	0.774492
0.0368387	0.0704256	1	Prpf8	Virgin_vs_PP	CA1	0.243183
0.0966794	0.0703402	1	Rpl13	Virgin_vs_PP	CA1	0.384884
0.0981908	0.0702858	1	Zdhhc17	Virgin_vs_PP	CA1	0.386609
0.647839	0.07025	1	Mbtd1	Virgin_vs_PP	CA1	0.854479
0.189069	0.0702254	1	Arid4b	Virgin_vs_PP	CA1	0.524493
0.437574	0.0701159	1	Tmsb10	Virgin_vs_PP	CA1	0.728066
0.247801	0.0699415	1	Becn1	Virgin_vs_PP	CA1	0.582898
0.700105	0.0699192	1	Timm17a	Virgin_vs_PP	CA1	0.874722
0.510061	0.0698537	1	Ptprt	Virgin_vs_PP	CA1	0.776866
0.544714	0.0698507	1	Jarid2	Virgin_vs_PP	CA1	0.797593
0.787635	0.0697798	1	Serpini1	Virgin_vs_PP	CA1	0.913551
0.616765	0.069644	1	Exosc9	Virgin_vs_PP	CA1	0.836977
0.215699	0.0696324	1	Adrbk1	Virgin_vs_PP	CA1	0.552479
0.13654	0.0695839	1	Paqr3	Virgin_vs_PP	CA1	0.447966
0.391201	0.0695772	1	2300009A05Rik	Virgin_vs_PP	CA1	0.69777
0.448986	0.0695677	1	Pcyox1	Virgin_vs_PP	CA1	0.737217
0.419062	0.0695452	1	Cxadr	Virgin_vs_PP	CA1	0.715775
0.0194681	0.069496	1	Nol12	Virgin_vs_PP	CA1	0.181867
0.178785	0.069289	1	Mark2	Virgin_vs_PP	CA1	0.508984
0.0799711	0.0692536	1	Gapdh	Virgin_vs_PP	CA1	0.357283
0.230091	0.0692132	1	Scg5	Virgin_vs_PP	CA1	0.566692
0.271639	0.0691751	1	Cdkl3	Virgin_vs_PP	CA1	0.608289
0.432664	0.0691696	1	Nup62	Virgin_vs_PP	CA1	0.72515
0.799374	0.069165	1	Gle1	Virgin_vs_PP	CA1	0.917919
0.103145	0.0691447	1	Lhx2	Virgin_vs_PP	CA1	0.394327
0.375209	0.069118	1	Fuca2	Virgin_vs_PP	CA1	0.692083
0.234185	0.0689964	1	Stim1	Virgin_vs_PP	CA1	0.568979
0.277071	0.0689533	1	Erp44	Virgin_vs_PP	CA1	0.612746
0.312699	0.0689533	1	Pwwp2a	Virgin_vs_PP	CA1	0.644429
0.0544009	0.0688066	1	Spock2	Virgin_vs_PP	CA1	0.295434
0.247146	0.0687007	1	Ergic3	Virgin_vs_PP	CA1	0.582444
0.231226	0.068661	1	Atp6v0d1	Virgin_vs_PP	CA1	0.567299
0.374952	0.0686024	1	Cnot10	Virgin_vs_PP	CA1	0.691965
0.460757	0.0685393	1	Fam73b	Virgin_vs_PP	CA1	0.745144
0.197392	0.0685358	1	Mark1	Virgin_vs_PP	CA1	0.532542
0.367609	0.0683366	1	Xylt1	Virgin_vs_PP	CA1	0.686172
0.525749	0.0683039	1	P4htm	Virgin_vs_PP	CA1	0.785623
0.490175	0.0682115	1	Fam57b	Virgin_vs_PP	CA1	0.767049
0.425712	0.0681761	1	Krr1	Virgin_vs_PP	CA1	0.719914
0.539419	0.0681337	1	Auts2	Virgin_vs_PP	CA1	0.794194
0.110796	0.0681015	1	Dennd6a	Virgin_vs_PP	CA1	0.406645
0.279388	0.0680681	1	Stxbp1	Virgin_vs_PP	CA1	0.615093
0.771201	0.0678939	1	Omg	Virgin_vs_PP	CA1	0.906882
0.491094	0.0678911	1	Fchsd2	Virgin_vs_PP	CA1	0.767588
0.81429	0.0676679	1	Taf4	Virgin_vs_PP	CA1	0.925129
0.362041	0.0676185	1	Kcnip3	Virgin_vs_PP	CA1	0.679901
0.361445	0.0676118	1	Rhbdd2	Virgin_vs_PP	CA1	0.679901
0.744884	0.0675812	1	Ckap4	Virgin_vs_PP	CA1	0.893636
0.516673	0.0673902	1	Scai	Virgin_vs_PP	CA1	0.780997
0.313002	0.0673619	1	Gipc1	Virgin_vs_PP	CA1	0.644429
0.358858	0.0673064	1	Cyb561	Virgin_vs_PP	CA1	0.679629
0.615001	0.0672229	1	Fam49b	Virgin_vs_PP	CA1	0.836957
0.584723	0.0672061	1	Ulk1	Virgin_vs_PP	CA1	0.817083
0.384351	0.0671635	1	Zfp316	Virgin_vs_PP	CA1	0.69386
0.153232	0.0671538	1	Prpf39	Virgin_vs_PP	CA1	0.472473
0.0533751	0.0671273	1	Irgq	Virgin_vs_PP	CA1	0.293388
0.19253	0.0669588	1	Jakmip1	Virgin_vs_PP	CA1	0.526678
0.522994	0.0669353	1	Uspl1	Virgin_vs_PP	CA1	0.783557
0.287959	0.0668731	1	Asb13	Virgin_vs_PP	CA1	0.622553
0.366896	0.0668482	1	Mrpl20	Virgin_vs_PP	CA1	0.685495
0.341785	0.0667685	1	Chd1	Virgin_vs_PP	CA1	0.667662
0.122346	0.0667648	1	Rgs7bp	Virgin_vs_PP	CA1	0.425692
0.118538	0.0667468	1	Ssr1	Virgin_vs_PP	CA1	0.42073
0.299997	0.0666526	1	Krit1	Virgin_vs_PP	CA1	0.633303
0.680335	0.066587	1	Tmem200a	Virgin_vs_PP	CA1	0.865401
0.313983	0.0665777	1	Tmem130	Virgin_vs_PP	CA1	0.645335
0.18683	0.0665598	1	St7	Virgin_vs_PP	CA1	0.522356
0.355014	0.0664239	1	Fam13a	Virgin_vs_PP	CA1	0.677956
0.41972	0.066368	1	Shisa5	Virgin_vs_PP	CA1	0.71615
0.523851	0.0663418	1	Rab12	Virgin_vs_PP	CA1	0.784227
0.552265	0.0662522	1	Nek1	Virgin_vs_PP	CA1	0.800917
0.314073	0.066245	1	Zfp622	Virgin_vs_PP	CA1	0.645335
0.180681	0.0662287	1	Acad8	Virgin_vs_PP	CA1	0.511895
0.543315	0.0661003	1	Ndufb5	Virgin_vs_PP	CA1	0.797246
0.0498769	0.0660353	1	BC030336	Virgin_vs_PP	CA1	0.281804
0.434607	0.0660281	1	Tsc1	Virgin_vs_PP	CA1	0.72515
0.179547	0.0659596	1	Vamp1	Virgin_vs_PP	CA1	0.509833
0.453899	0.0658484	1	Orc5	Virgin_vs_PP	CA1	0.740939
0.249706	0.06584	1	Paox	Virgin_vs_PP	CA1	0.585462
0.0543637	0.0657746	1	Tenm4	Virgin_vs_PP	CA1	0.295434
0.0835072	0.0657331	1	Tnpo3	Virgin_vs_PP	CA1	0.363929
0.351248	0.0657055	1	Psma7	Virgin_vs_PP	CA1	0.674837
0.354229	0.0656138	1	Abhd6	Virgin_vs_PP	CA1	0.677335
0.0816761	0.0655985	1	Grin3a	Virgin_vs_PP	CA1	0.360578
0.73431	0.0655945	1	Kmt2e	Virgin_vs_PP	CA1	0.888074
0.345983	0.0655604	1	Zbtb7a	Virgin_vs_PP	CA1	0.670291
0.00295875	0.0653389	1	Socs2	Virgin_vs_PP	CA1	0.057997
0.512819	0.0653194	1	Rtn4	Virgin_vs_PP	CA1	0.778636
0.519394	0.0653175	1	Ephx4	Virgin_vs_PP	CA1	0.782768
0.516157	0.0653016	1	Ndst1	Virgin_vs_PP	CA1	0.780888
0.611036	0.0652933	1	Ank3	Virgin_vs_PP	CA1	0.835122
0.583526	0.0652788	1	Serpine2	Virgin_vs_PP	CA1	0.816373
0.384421	0.0652128	1	Polr2e	Virgin_vs_PP	CA1	0.69386
0.423569	0.0651841	1	Pttg1	Virgin_vs_PP	CA1	0.718296
0.732044	0.0651805	1	Brd7	Virgin_vs_PP	CA1	0.888074
0.633583	0.065052	1	Gm10419	Virgin_vs_PP	CA1	0.848183
0.563016	0.0650282	1	Nrp1	Virgin_vs_PP	CA1	0.80789
0.684783	0.0649795	1	Slc2a13	Virgin_vs_PP	CA1	0.867139
0.243049	0.0649514	1	Adarb1	Virgin_vs_PP	CA1	0.578903
0.471111	0.0649296	1	Cox19	Virgin_vs_PP	CA1	0.749725
0.0684476	0.0649245	1	Aldoa	Virgin_vs_PP	CA1	0.335165
0.237355	0.0649061	1	Rbx1	Virgin_vs_PP	CA1	0.573309
0.470274	0.0648671	1	Zcchc11	Virgin_vs_PP	CA1	0.749725
0.410704	0.0647455	1	Ackr1	Virgin_vs_PP	CA1	0.708959
0.326269	0.0647374	1	Set	Virgin_vs_PP	CA1	0.65365
0.429807	0.0646903	1	Galnt2	Virgin_vs_PP	CA1	0.723543
0.363912	0.0646181	1	Cbx6	Virgin_vs_PP	CA1	0.681226
0.375272	0.0644252	1	Ier3ip1	Virgin_vs_PP	CA1	0.692083
0.340204	0.0644016	1	Gdpd1	Virgin_vs_PP	CA1	0.665902
0.336915	0.0643805	1	Mvb12b	Virgin_vs_PP	CA1	0.662333
0.396276	0.0643793	1	Hgs	Virgin_vs_PP	CA1	0.700728
0.457024	0.0643595	1	Pecam1	Virgin_vs_PP	CA1	0.742757
0.537931	0.064327	1	Chchd7	Virgin_vs_PP	CA1	0.793018
0.516488	0.0643179	1	Chkb	Virgin_vs_PP	CA1	0.780997
0.592915	0.0643046	1	Eea1	Virgin_vs_PP	CA1	0.824412
0.225478	0.0642686	1	Arxes2	Virgin_vs_PP	CA1	0.564271
0.464346	0.0642425	1	Fndc3a	Virgin_vs_PP	CA1	0.746511
0.29208	0.0642151	1	Aacs	Virgin_vs_PP	CA1	0.62546
0.49708	0.0641496	1	Tpd52	Virgin_vs_PP	CA1	0.771529
0.00941617	0.0640515	1	Ccsap	Virgin_vs_PP	CA1	0.117472
0.199613	0.0640399	1	Tmem65	Virgin_vs_PP	CA1	0.534815
0.00027703	0.0640073	1	Snhg11	Virgin_vs_PP	CA1	0.00986564
0.0523999	0.0639274	1	Smarca4	Virgin_vs_PP	CA1	0.291765
0.362833	0.0638872	1	Nab1	Virgin_vs_PP	CA1	0.680501
0.634995	0.0638432	1	Ctage5	Virgin_vs_PP	CA1	0.848557
0.321388	0.0638011	1	Hibch	Virgin_vs_PP	CA1	0.649407
0.505413	0.0638005	1	Topbp1	Virgin_vs_PP	CA1	0.775353
0.60705	0.0637866	1	Chmp1a	Virgin_vs_PP	CA1	0.833023
0.633842	0.0637616	1	Rcbtb1	Virgin_vs_PP	CA1	0.848183
0.434073	0.0637454	1	Eml4	Virgin_vs_PP	CA1	0.72515
0.422774	0.063744	1	Dhrs7b	Virgin_vs_PP	CA1	0.718134
0.421576	0.0637235	1	Pkd2	Virgin_vs_PP	CA1	0.717193
0.726637	0.0637075	1	Ogfrl1	Virgin_vs_PP	CA1	0.886386
0.462735	0.063671	1	Zfp9	Virgin_vs_PP	CA1	0.745144
0.440644	0.0636639	1	Usp8	Virgin_vs_PP	CA1	0.729975
0.422676	0.0636312	1	Gid8	Virgin_vs_PP	CA1	0.718134
0.213549	0.0634966	1	Laptm4a	Virgin_vs_PP	CA1	0.549634
0.0979003	0.0634727	1	N4bp2l1	Virgin_vs_PP	CA1	0.386609
0.10068	0.0634148	1	Spaca6	Virgin_vs_PP	CA1	0.390423
0.571987	0.0633364	1	Slc25a20	Virgin_vs_PP	CA1	0.811434
0.355295	0.063307	1	Ski	Virgin_vs_PP	CA1	0.677956
0.403835	0.0632733	1	Slc4a10	Virgin_vs_PP	CA1	0.706652
0.48435	0.0632691	1	Fstl1	Virgin_vs_PP	CA1	0.760893
0.609243	0.0632403	1	Mbd3	Virgin_vs_PP	CA1	0.834089
0.317722	0.0632267	1	Lpin2	Virgin_vs_PP	CA1	0.647792
0.0880925	0.0631763	1	Pnck	Virgin_vs_PP	CA1	0.370266
0.652007	0.063117	1	Asah1	Virgin_vs_PP	CA1	0.854675
0.141173	0.0629519	1	Ccnc	Virgin_vs_PP	CA1	0.455692
0.290035	0.0629297	1	Dctn1	Virgin_vs_PP	CA1	0.623713
0.0375958	0.062902	1	Stip1	Virgin_vs_PP	CA1	0.244915
0.189856	0.0628971	1	Rmnd5a	Virgin_vs_PP	CA1	0.524493
0.12678	0.0628868	1	Kbtbd2	Virgin_vs_PP	CA1	0.432111
0.293457	0.062835	1	Mtm1	Virgin_vs_PP	CA1	0.627058
0.376217	0.0628043	1	Hs6st1	Virgin_vs_PP	CA1	0.692863
0.393584	0.0627388	1	Pdia3	Virgin_vs_PP	CA1	0.69837
0.00800335	0.0626933	1	Rbms1	Virgin_vs_PP	CA1	0.1067
0.353773	0.0626601	1	Slc25a42	Virgin_vs_PP	CA1	0.676903
0.11707	0.062608	1	Mrpl19	Virgin_vs_PP	CA1	0.418433
0.563159	0.0625477	1	Srpk1	Virgin_vs_PP	CA1	0.807891
0.66385	0.0625295	1	Tmem184c	Virgin_vs_PP	CA1	0.856909
0.397339	0.0623618	1	Tgfbr3	Virgin_vs_PP	CA1	0.701746
0.210925	0.0622981	1	Ssr4	Virgin_vs_PP	CA1	0.546471
0.0565542	0.0622902	1	Smad3	Virgin_vs_PP	CA1	0.301828
0.471003	0.0622508	1	Ly6e	Virgin_vs_PP	CA1	0.749725
0.524411	0.0621946	1	Brinp1	Virgin_vs_PP	CA1	0.78448
0.529313	0.0621892	1	Fads6	Virgin_vs_PP	CA1	0.788825
0.41176	0.062185	1	2310022A10Rik	Virgin_vs_PP	CA1	0.709324
0.314384	0.0621637	1	Aip	Virgin_vs_PP	CA1	0.645338
0.691211	0.0621384	1	Cd46	Virgin_vs_PP	CA1	0.870949
0.52042	0.0621054	1	Cep170b	Virgin_vs_PP	CA1	0.782768
0.0239649	0.0620879	1	Trmt1l	Virgin_vs_PP	CA1	0.198644
0.234774	0.0620482	1	Slf1	Virgin_vs_PP	CA1	0.569777
0.57525	0.0620337	1	Zfp160	Virgin_vs_PP	CA1	0.81245
0.392542	0.0619402	1	Mkln1	Virgin_vs_PP	CA1	0.697946
0.38395	0.0618744	1	Bfar	Virgin_vs_PP	CA1	0.69386
0.0830562	0.0618661	1	Acin1	Virgin_vs_PP	CA1	0.363929
0.266996	0.0617948	1	Ids	Virgin_vs_PP	CA1	0.602946
0.61693	0.0617772	1	Arhgap39	Virgin_vs_PP	CA1	0.837008
0.265221	0.0616781	1	Ckmt1	Virgin_vs_PP	CA1	0.599862
0.502235	0.0615615	1	Ankrd45	Virgin_vs_PP	CA1	0.774492
0.332925	0.0615071	1	Hspa5	Virgin_vs_PP	CA1	0.660058
0.34326	0.061498	1	C330007P06Rik	Virgin_vs_PP	CA1	0.668443
0.230397	0.0614771	1	Camkk2	Virgin_vs_PP	CA1	0.566692
0.0572791	0.0614225	1	Derl1	Virgin_vs_PP	CA1	0.303218
0.31257	0.0613829	1	Loxl2	Virgin_vs_PP	CA1	0.644429
0.044615	0.0613661	1	Cd164	Virgin_vs_PP	CA1	0.266405
0.977673	0.0613247	1	Rabggtb	Virgin_vs_PP	CA1	0.99033
0.746703	0.0613235	1	Fam174a	Virgin_vs_PP	CA1	0.894409
0.270794	0.061307	1	Ctsl	Virgin_vs_PP	CA1	0.60802
0.47069	0.0612469	1	AI846148	Virgin_vs_PP	CA1	0.749725
0.461467	0.0612141	1	Lypd1	Virgin_vs_PP	CA1	0.745144
0.314306	0.0611746	1	Hdac11	Virgin_vs_PP	CA1	0.645338
0.78398	0.0611578	1	Rala	Virgin_vs_PP	CA1	0.912104
0.394795	0.0611136	1	Cadm2	Virgin_vs_PP	CA1	0.6994
0.400264	0.0610409	1	Prpf19	Virgin_vs_PP	CA1	0.704178
0.242815	0.0610276	1	Oxsm	Virgin_vs_PP	CA1	0.578581
0.255067	0.0609706	1	Gm11696	Virgin_vs_PP	CA1	0.592166
0.439686	0.0609502	1	Arc	Virgin_vs_PP	CA1	0.729067
0.164616	0.0609053	1	Nktr	Virgin_vs_PP	CA1	0.487051
0.735823	0.0607708	1	Glcci1	Virgin_vs_PP	CA1	0.888074
0.462409	0.0606843	1	Ctnnd1	Virgin_vs_PP	CA1	0.745144
0.188329	0.0606392	1	Katnal1	Virgin_vs_PP	CA1	0.52372
0.246622	0.0606297	1	Rpl10	Virgin_vs_PP	CA1	0.582369
0.25702	0.0606257	1	4732419C18Rik	Virgin_vs_PP	CA1	0.594587
0.516766	0.0605946	1	Ankrd16	Virgin_vs_PP	CA1	0.780997
0.0549514	0.0605468	1	Colec12	Virgin_vs_PP	CA1	0.296463
0.479352	0.0604302	1	Psap	Virgin_vs_PP	CA1	0.756284
0.6183	0.0603972	1	Zcchc14	Virgin_vs_PP	CA1	0.837705
0.284797	0.0603626	1	Otud6b	Virgin_vs_PP	CA1	0.620723
0.164232	0.0603571	1	Pianp	Virgin_vs_PP	CA1	0.486403
0.492826	0.060336	1	Med19	Virgin_vs_PP	CA1	0.768333
0.45276	0.060223	1	Glud1	Virgin_vs_PP	CA1	0.740086
0.224201	0.0601906	1	Bcap31	Virgin_vs_PP	CA1	0.562512
0.656507	0.0601446	1	Gpatch11	Virgin_vs_PP	CA1	0.855351
0.151608	0.060126	1	Atp6v0a1	Virgin_vs_PP	CA1	0.469955
0.615461	0.06006	1	Papss1	Virgin_vs_PP	CA1	0.836977
0.211252	0.0599911	1	Acp1	Virgin_vs_PP	CA1	0.547011
0.203604	0.0599778	1	Psme4	Virgin_vs_PP	CA1	0.537532
0.658072	0.0598312	1	Cdkal1	Virgin_vs_PP	CA1	0.855478
0.634463	0.0597418	1	Tra2b	Virgin_vs_PP	CA1	0.848557
0.299919	0.0597382	1	Oaz1	Virgin_vs_PP	CA1	0.633303
0.345075	0.0597225	1	Gm38025	Virgin_vs_PP	CA1	0.668975
0.630391	0.0596459	1	Gm26853	Virgin_vs_PP	CA1	0.846862
0.0545148	0.059487	1	Nol3	Virgin_vs_PP	CA1	0.295628
0.230388	0.0594755	1	Rnf11	Virgin_vs_PP	CA1	0.566692
0.319583	0.0593545	1	Slc38a6	Virgin_vs_PP	CA1	0.648663
0.345259	0.0593122	1	Proser1	Virgin_vs_PP	CA1	0.669109
0.305606	0.059264	1	Acp2	Virgin_vs_PP	CA1	0.636562
0.591257	0.0591963	1	0610010F05Rik	Virgin_vs_PP	CA1	0.822886
0.545878	0.0591909	1	Rufy3	Virgin_vs_PP	CA1	0.79839
0.534744	0.0591537	1	Sft2d1	Virgin_vs_PP	CA1	0.791674
0.209265	0.0590676	1	Ube3c	Virgin_vs_PP	CA1	0.544683
0.0314403	0.0589895	1	Ntng1	Virgin_vs_PP	CA1	0.225444
0.656714	0.0589657	1	Slc7a4	Virgin_vs_PP	CA1	0.855432
0.335439	0.058914	1	Atl2	Virgin_vs_PP	CA1	0.662267
0.162803	0.0589068	1	Dennd1a	Virgin_vs_PP	CA1	0.484861
0.376748	0.0588856	1	Arsb	Virgin_vs_PP	CA1	0.693104
0.320244	0.0588852	1	Irak1	Virgin_vs_PP	CA1	0.648663
0.303075	0.0588695	1	Rft1	Virgin_vs_PP	CA1	0.635975
0.202298	0.0588067	1	Peg3	Virgin_vs_PP	CA1	0.536506
0.471115	0.0586991	1	Unc5c	Virgin_vs_PP	CA1	0.749725
0.697451	0.0586377	1	Rc3h2	Virgin_vs_PP	CA1	0.873541
0.0693734	0.0586175	1	Nop10	Virgin_vs_PP	CA1	0.335781
0.698268	0.0586095	1	Dab2ip	Virgin_vs_PP	CA1	0.873541
0.802819	0.0585829	1	Slain2	Virgin_vs_PP	CA1	0.919831
0.336134	0.0585625	1	Wwc2	Virgin_vs_PP	CA1	0.662267
0.199205	0.0584606	1	Nup205	Virgin_vs_PP	CA1	0.534807
0.572257	0.0583725	1	Lingo1	Virgin_vs_PP	CA1	0.811434
0.687986	0.058275	1	Rbm22	Virgin_vs_PP	CA1	0.868652
0.481593	0.0582408	1	Rasa4	Virgin_vs_PP	CA1	0.758264
0.828951	0.0581725	1	Arhgap23	Virgin_vs_PP	CA1	0.931637
0.127412	0.0581581	1	Rplp1	Virgin_vs_PP	CA1	0.433259
0.510881	0.0581449	1	Nr2f1	Virgin_vs_PP	CA1	0.777301
0.00240147	0.0580782	1	Dgkg	Virgin_vs_PP	CA1	0.0502172
0.495664	0.0580769	1	Atg4c	Virgin_vs_PP	CA1	0.770305
0.622114	0.058065	1	Dazap2	Virgin_vs_PP	CA1	0.841437
0.565836	0.0579635	1	1500004A13Rik	Virgin_vs_PP	CA1	0.809163
0.539922	0.0579587	1	Zfp938	Virgin_vs_PP	CA1	0.794734
0.471069	0.0577996	1	Cdc14b	Virgin_vs_PP	CA1	0.749725
0.469217	0.0577611	1	Tprkb	Virgin_vs_PP	CA1	0.749309
0.688373	0.057703	1	Cux1	Virgin_vs_PP	CA1	0.868746
0.74714	0.0576916	1	Ep400	Virgin_vs_PP	CA1	0.894409
0.376079	0.0576643	1	Setd7	Virgin_vs_PP	CA1	0.692863
0.0550022	0.0575899	1	Pddc1	Virgin_vs_PP	CA1	0.296463
0.44232	0.057576	1	Pank2	Virgin_vs_PP	CA1	0.731813
0.351774	0.0575637	1	Mtfp1	Virgin_vs_PP	CA1	0.674837
0.496204	0.0574485	1	Zmym3	Virgin_vs_PP	CA1	0.770737
0.644144	0.057315	1	Crbn	Virgin_vs_PP	CA1	0.852859
0.434648	0.0572882	1	Kcnj4	Virgin_vs_PP	CA1	0.72515
0.69671	0.0572188	1	Nudt10	Virgin_vs_PP	CA1	0.873541
0.0631097	0.0571055	1	Dnajc6	Virgin_vs_PP	CA1	0.320235
0.319128	0.0570493	1	Kif1b	Virgin_vs_PP	CA1	0.648663
0.301935	0.0570071	1	Npc1	Virgin_vs_PP	CA1	0.635297
0.419745	0.0570026	1	Rnf13	Virgin_vs_PP	CA1	0.71615
0.0977516	0.0569056	1	Yeats2	Virgin_vs_PP	CA1	0.386609
0.281016	0.0568977	1	Cd300lf	Virgin_vs_PP	CA1	0.616338
0.416012	0.0567837	1	Rabl6	Virgin_vs_PP	CA1	0.712984
0.614212	0.0567136	1	Saraf	Virgin_vs_PP	CA1	0.836604
0.178569	0.0566002	1	Kcnc3	Virgin_vs_PP	CA1	0.508861
0.767804	0.0565892	1	Zfp62	Virgin_vs_PP	CA1	0.90522
0.867295	0.0565447	1	Cspp1	Virgin_vs_PP	CA1	0.950359
0.353479	0.0565014	1	Asun	Virgin_vs_PP	CA1	0.676562
0.532001	0.0564851	1	Prr13	Virgin_vs_PP	CA1	0.79029
0.651058	0.0564722	1	Tomm7	Virgin_vs_PP	CA1	0.854675
0.561622	0.0564163	1	Tsc2	Virgin_vs_PP	CA1	0.807574
0.128755	0.056383	1	Hspa12b	Virgin_vs_PP	CA1	0.435305
0.73611	0.0563357	1	9330159F19Rik	Virgin_vs_PP	CA1	0.888074
0.433222	0.0562087	1	D430042O09Rik	Virgin_vs_PP	CA1	0.72515
0.318106	0.0561511	1	Fkrp	Virgin_vs_PP	CA1	0.648349
0.35128	0.0560555	1	Svop	Virgin_vs_PP	CA1	0.674837
0.767099	0.0559617	1	Mvp	Virgin_vs_PP	CA1	0.904751
0.31697	0.0558431	1	Isca1	Virgin_vs_PP	CA1	0.647607
0.63763	0.0556802	1	Rbsn	Virgin_vs_PP	CA1	0.850366
0.360483	0.055584	1	Pitrm1	Virgin_vs_PP	CA1	0.679901
0.651035	0.0555645	1	Trp53inp2	Virgin_vs_PP	CA1	0.854675
0.28028	0.0555126	1	Tmlhe	Virgin_vs_PP	CA1	0.615673
0.586392	0.0552821	1	Syt7	Virgin_vs_PP	CA1	0.818637
0.811796	0.0552323	1	Cask	Virgin_vs_PP	CA1	0.923545
0.523974	0.0552317	1	Kcnv1	Virgin_vs_PP	CA1	0.784227
0.438928	0.0550917	1	Zc2hc1a	Virgin_vs_PP	CA1	0.728571
0.18984	0.0549994	1	Ext1	Virgin_vs_PP	CA1	0.524493
0.70893	0.0549864	1	Arhgap26	Virgin_vs_PP	CA1	0.878834
0.138415	0.0549752	1	Gm16222	Virgin_vs_PP	CA1	0.451101
0.296302	0.0549036	1	Rpl15	Virgin_vs_PP	CA1	0.628396
0.22338	0.0548826	1	Ufd1l	Virgin_vs_PP	CA1	0.561084
0.562298	0.0548117	1	Cwc15	Virgin_vs_PP	CA1	0.807641
0.359865	0.0547486	1	1110008P14Rik	Virgin_vs_PP	CA1	0.679706
0.648489	0.0547272	1	Baz2b	Virgin_vs_PP	CA1	0.854594
0.182881	0.0547228	1	Ppil2	Virgin_vs_PP	CA1	0.515588
0.457714	0.0546365	1	Negr1	Virgin_vs_PP	CA1	0.742757
0.506792	0.0546295	1	Adam23	Virgin_vs_PP	CA1	0.775366
0.469274	0.0545934	1	Snrpf	Virgin_vs_PP	CA1	0.749309
0.778949	0.0545445	1	Anapc4	Virgin_vs_PP	CA1	0.909748
0.123033	0.0545316	1	Dnal1	Virgin_vs_PP	CA1	0.426514
0.251182	0.0545193	1	Phlpp2	Virgin_vs_PP	CA1	0.58709
0.62332	0.0544792	1	Taf15	Virgin_vs_PP	CA1	0.84243
0.295379	0.0544633	1	Palm	Virgin_vs_PP	CA1	0.628175
0.283628	0.0544603	1	Neto2	Virgin_vs_PP	CA1	0.619323
0.463929	0.0544356	1	Gpr107	Virgin_vs_PP	CA1	0.746249
0.261599	0.0543838	1	Golph3	Virgin_vs_PP	CA1	0.598545
0.0215282	0.054331	1	Sirpa	Virgin_vs_PP	CA1	0.189263
0.560801	0.0542349	1	Nfxl1	Virgin_vs_PP	CA1	0.80741
0.498328	0.0541846	1	Tmpo	Virgin_vs_PP	CA1	0.772606
0.070399	0.0541758	1	Suco	Virgin_vs_PP	CA1	0.339297
0.289441	0.0541235	1	Ahcyl2	Virgin_vs_PP	CA1	0.623235
0.472069	0.0540941	1	Ddx39b	Virgin_vs_PP	CA1	0.750589
0.369737	0.0540811	1	Ttc4	Virgin_vs_PP	CA1	0.686512
0.793635	0.0540133	1	B630005N14Rik	Virgin_vs_PP	CA1	0.916474
0.0451277	0.0539977	1	Fam171a2	Virgin_vs_PP	CA1	0.26812
0.867434	0.0537843	1	Uhrf1bp1l	Virgin_vs_PP	CA1	0.950359
0.044103	0.0537374	1	Klhdc10	Virgin_vs_PP	CA1	0.264801
0.631185	0.0537323	1	Rps7	Virgin_vs_PP	CA1	0.847409
0.38421	0.0536721	1	Cacna1h	Virgin_vs_PP	CA1	0.69386
0.535183	0.0535757	1	Prim2	Virgin_vs_PP	CA1	0.791925
0.628825	0.0535132	1	Gpr137	Virgin_vs_PP	CA1	0.84592
0.55074	0.0534451	1	Sppl2a	Virgin_vs_PP	CA1	0.799838
0.543663	0.0534256	1	Erlin2	Virgin_vs_PP	CA1	0.797246
0.240095	0.0533961	1	Ash1l	Virgin_vs_PP	CA1	0.576677
0.632975	0.0533362	1	Bbs1	Virgin_vs_PP	CA1	0.848161
0.332976	0.0533128	1	Asrgl1	Virgin_vs_PP	CA1	0.660058
0.034706	0.0532601	1	Hyou1	Virgin_vs_PP	CA1	0.237407
0.547256	0.0532535	1	Eef1a2	Virgin_vs_PP	CA1	0.798926
0.421717	0.0532532	1	Rpl28	Virgin_vs_PP	CA1	0.717224
0.579535	0.0531255	1	Ubac1	Virgin_vs_PP	CA1	0.813258
0.389563	0.0530044	1	Cpeb3	Virgin_vs_PP	CA1	0.696577
0.101837	0.0530038	1	Kat7	Virgin_vs_PP	CA1	0.392134
0.083688	0.0529409	1	Tpp2	Virgin_vs_PP	CA1	0.363929
0.306718	0.0528536	1	Mapt	Virgin_vs_PP	CA1	0.637747
0.576449	0.0527176	1	Maneal	Virgin_vs_PP	CA1	0.812778
0.712121	0.0527089	1	Gatad2b	Virgin_vs_PP	CA1	0.881117
0.988238	0.0527042	1	Golga4	Virgin_vs_PP	CA1	0.995865
0.315831	0.0526962	1	1110051M20Rik	Virgin_vs_PP	CA1	0.647079
0.105469	0.0526942	1	Kif5a	Virgin_vs_PP	CA1	0.399056
0.143995	0.05268	1	Atrnl1	Virgin_vs_PP	CA1	0.458549
0.755474	0.052618	1	Acap3	Virgin_vs_PP	CA1	0.898741
0.348166	0.0526107	1	Atp5f1	Virgin_vs_PP	CA1	0.672747
0.659277	0.0525545	1	Copb1	Virgin_vs_PP	CA1	0.855478
0.261308	0.0524981	1	Pacsin1	Virgin_vs_PP	CA1	0.598545
0.370843	0.0524675	1	Slc12a5	Virgin_vs_PP	CA1	0.687188
0.210218	0.052452	1	Gtf2i	Virgin_vs_PP	CA1	0.545407
0.72785	0.0523915	1	Sdr39u1	Virgin_vs_PP	CA1	0.887497
0.129265	0.0523489	1	Psmb7	Virgin_vs_PP	CA1	0.435528
0.109968	0.0523384	1	Ndrg4	Virgin_vs_PP	CA1	0.405024
0.643339	0.05229	1	Alms1	Virgin_vs_PP	CA1	0.852178
0.341719	0.0522763	1	Slc25a39	Virgin_vs_PP	CA1	0.667662
0.411357	0.0522574	1	Epn1	Virgin_vs_PP	CA1	0.709189
0.233483	0.0522556	1	Ezh1	Virgin_vs_PP	CA1	0.568329
0.454807	0.05225	1	Dpm2	Virgin_vs_PP	CA1	0.741522
0.484899	0.0522369	1	Ift81	Virgin_vs_PP	CA1	0.761226
0.382621	0.052228	1	Srrm4	Virgin_vs_PP	CA1	0.69386
0.180766	0.0522215	1	Tpm3	Virgin_vs_PP	CA1	0.511895
0.537019	0.0522111	1	Kcna1	Virgin_vs_PP	CA1	0.792932
0.723115	0.0522027	1	Runx1t1	Virgin_vs_PP	CA1	0.884655
0.000184665	0.0521528	1	Cul4a	Virgin_vs_PP	CA1	0.0071724
0.56774	0.0521262	1	Klhdc2	Virgin_vs_PP	CA1	0.810111
0.423396	0.0521075	1	Mpc1	Virgin_vs_PP	CA1	0.718296
0.608992	0.0520872	1	BC005624	Virgin_vs_PP	CA1	0.83394
0.494989	0.0520413	1	Prrc2a	Virgin_vs_PP	CA1	0.769662
0.411638	0.0518666	1	Tial1	Virgin_vs_PP	CA1	0.709322
0.418503	0.0517566	1	Ostm1	Virgin_vs_PP	CA1	0.715277
0.438899	0.0517561	1	Iffo1	Virgin_vs_PP	CA1	0.728571
0.461845	0.0516491	1	Cox5a	Virgin_vs_PP	CA1	0.745144
0.512573	0.0516379	1	Syt4	Virgin_vs_PP	CA1	0.778586
0.00910283	0.0516118	1	Alg6	Virgin_vs_PP	CA1	0.115028
0.653478	0.0515402	1	Entpd6	Virgin_vs_PP	CA1	0.854675
0.136243	0.0515151	1	Eif2a	Virgin_vs_PP	CA1	0.447966
0.0861201	0.0514519	1	Cplx1	Virgin_vs_PP	CA1	0.366431
0.107881	0.0513928	1	D10Jhu81e	Virgin_vs_PP	CA1	0.40365
0.69798	0.0513762	1	Pde4b	Virgin_vs_PP	CA1	0.873541
0.543856	0.0513346	1	Kdelr1	Virgin_vs_PP	CA1	0.797303
0.0581014	0.0512907	1	Lman2	Virgin_vs_PP	CA1	0.306192
0.188203	0.0512664	1	Atg2b	Virgin_vs_PP	CA1	0.523618
0.163853	0.0511511	1	Ccdc59	Virgin_vs_PP	CA1	0.485773
0.592526	0.0511418	1	Carf	Virgin_vs_PP	CA1	0.824262
0.217239	0.0510207	1	Trim33	Virgin_vs_PP	CA1	0.553314
0.465346	0.0509773	1	Herc3	Virgin_vs_PP	CA1	0.747301
0.662323	0.0509714	1	BC005537	Virgin_vs_PP	CA1	0.856817
0.732327	0.0508835	1	Mlec	Virgin_vs_PP	CA1	0.888074
0.156947	0.0507404	1	Abhd5	Virgin_vs_PP	CA1	0.477062
0.623681	0.0506854	1	Etv3	Virgin_vs_PP	CA1	0.84243
0.659193	0.0506554	1	Pdap1	Virgin_vs_PP	CA1	0.855478
0.653569	0.050585	1	Fam161b	Virgin_vs_PP	CA1	0.854675
0.467333	0.0505712	1	Shtn1	Virgin_vs_PP	CA1	0.749206
0.751888	0.0505101	1	Gclc	Virgin_vs_PP	CA1	0.897137
0.0782222	0.0505066	1	Tmem234	Virgin_vs_PP	CA1	0.353564
0.33062	0.050349	1	Rps9	Virgin_vs_PP	CA1	0.657767
0.604524	0.0503115	1	Idh1	Virgin_vs_PP	CA1	0.831839
0.578618	0.0502717	1	Ulk3	Virgin_vs_PP	CA1	0.813193
0.501463	0.0501946	1	Lsamp	Virgin_vs_PP	CA1	0.774492
0.663339	0.0501889	1	Tspan33	Virgin_vs_PP	CA1	0.856909
0.590301	0.0501789	1	Tmem14a	Virgin_vs_PP	CA1	0.822335
0.704019	0.0501342	1	Fbxw7	Virgin_vs_PP	CA1	0.876818
0.382538	0.0500959	1	Capn2	Virgin_vs_PP	CA1	0.69386
0.714179	0.0500474	1	Actl6b	Virgin_vs_PP	CA1	0.881991
0.2009	0.0499848	1	Smchd1	Virgin_vs_PP	CA1	0.535279
0.435318	0.0499428	1	Orc6	Virgin_vs_PP	CA1	0.72586
0.573795	0.0499364	1	Sdc2	Virgin_vs_PP	CA1	0.812029
0.652402	0.0498861	1	Tmbim6	Virgin_vs_PP	CA1	0.854675
0.883716	0.0497908	1	Plekha1	Virgin_vs_PP	CA1	0.957942
0.76382	0.04976	1	Chd6	Virgin_vs_PP	CA1	0.902343
0.0707213	0.0496372	1	Atp5o	Virgin_vs_PP	CA1	0.339319
0.531873	0.0496281	1	Rell2	Virgin_vs_PP	CA1	0.79029
0.726822	0.0495918	1	Plxna2	Virgin_vs_PP	CA1	0.886427
0.725296	0.0495868	1	Npat	Virgin_vs_PP	CA1	0.885301
0.913662	0.0495585	1	Asic2	Virgin_vs_PP	CA1	0.966939
0.503425	0.0495402	1	2810417H13Rik	Virgin_vs_PP	CA1	0.77461
0.576417	0.0495351	1	Supt7l	Virgin_vs_PP	CA1	0.812778
0.383319	0.0495203	1	Pitpnm2	Virgin_vs_PP	CA1	0.69386
0.718175	0.0495193	1	Hivep3	Virgin_vs_PP	CA1	0.883398
0.798198	0.0495156	1	Chpf2	Virgin_vs_PP	CA1	0.917908
0.429696	0.0494218	1	Gm17615	Virgin_vs_PP	CA1	0.723543
0.23018	0.0494155	1	Ndufa8	Virgin_vs_PP	CA1	0.566692
0.57894	0.0494111	1	Mafg	Virgin_vs_PP	CA1	0.813258
0.685796	0.0493757	1	Pop5	Virgin_vs_PP	CA1	0.86773
0.0833961	0.0493692	1	Nyap1	Virgin_vs_PP	CA1	0.363929
0.255647	0.0492772	1	Slc35a1	Virgin_vs_PP	CA1	0.593044
0.626785	0.0492665	1	Sept11	Virgin_vs_PP	CA1	0.844528
0.60833	0.0492131	1	Abca5	Virgin_vs_PP	CA1	0.833616
0.480941	0.0492006	1	Zfp141	Virgin_vs_PP	CA1	0.757644
0.233386	0.049175	1	Adgrb2	Virgin_vs_PP	CA1	0.568328
0.503507	0.049118	1	Abl2	Virgin_vs_PP	CA1	0.77461
0.483466	0.0489855	1	Ubp1	Virgin_vs_PP	CA1	0.759991
0.839873	0.0489571	1	Nop58	Virgin_vs_PP	CA1	0.937722
0.429092	0.048927	1	Stx1a	Virgin_vs_PP	CA1	0.723069
0.598668	0.0488277	1	Dapk1	Virgin_vs_PP	CA1	0.827702
0.550205	0.0488053	1	Tmem151a	Virgin_vs_PP	CA1	0.799828
0.434559	0.0487822	1	Nmrk1	Virgin_vs_PP	CA1	0.72515
0.663973	0.0487691	1	Wdfy1	Virgin_vs_PP	CA1	0.856909
0.394317	0.0487419	1	Hadhb	Virgin_vs_PP	CA1	0.699369
0.243566	0.0487392	1	Sun1	Virgin_vs_PP	CA1	0.578963
0.557703	0.0487118	1	Pfkm	Virgin_vs_PP	CA1	0.805373
0.351043	0.0486636	1	Rnf139	Virgin_vs_PP	CA1	0.674837
0.57475	0.0484426	1	Rnpep	Virgin_vs_PP	CA1	0.812029
0.735644	0.0484341	1	Fyn	Virgin_vs_PP	CA1	0.888074
0.196789	0.0484274	1	Ccdc53	Virgin_vs_PP	CA1	0.531589
0.0148659	0.0483632	1	Rab11fip4	Virgin_vs_PP	CA1	0.155022
0.468162	0.0483164	1	Nudc	Virgin_vs_PP	CA1	0.749309
0.440375	0.048173	1	Rabep1	Virgin_vs_PP	CA1	0.729942
0.506992	0.0481555	1	Appl1	Virgin_vs_PP	CA1	0.775366
0.665788	0.0481516	1	Ppp1r21	Virgin_vs_PP	CA1	0.857225
0.564842	0.0481182	1	Ndufa4	Virgin_vs_PP	CA1	0.809123
0.611579	0.0481164	1	Gm15446	Virgin_vs_PP	CA1	0.835536
0.673326	0.0481096	1	Map1lc3a	Virgin_vs_PP	CA1	0.861975
0.368083	0.0479311	1	Srpk2	Virgin_vs_PP	CA1	0.686209
0.0671948	0.0478432	1	Faah	Virgin_vs_PP	CA1	0.330684
0.655382	0.0478365	1	Snrk	Virgin_vs_PP	CA1	0.855024
0.682039	0.0478101	1	Pphln1	Virgin_vs_PP	CA1	0.865586
0.264404	0.0477647	1	Ctr9	Virgin_vs_PP	CA1	0.599847
0.38843	0.0477603	1	Slc39a6	Virgin_vs_PP	CA1	0.696064
0.154854	0.0476097	1	Tmod2	Virgin_vs_PP	CA1	0.47466
0.521178	0.047478	1	Mthfd1	Virgin_vs_PP	CA1	0.782768
0.258666	0.0473989	1	Micu1	Virgin_vs_PP	CA1	0.596192
0.668514	0.0473768	1	5031439G07Rik	Virgin_vs_PP	CA1	0.859184
0.719109	0.0473632	1	3110082I17Rik	Virgin_vs_PP	CA1	0.883808
0.488756	0.0473244	1	Mrps18c	Virgin_vs_PP	CA1	0.765236
0.42303	0.0472281	1	Rprm	Virgin_vs_PP	CA1	0.718134
0.049142	0.0471975	1	Gnas	Virgin_vs_PP	CA1	0.279727
0.286626	0.047195	1	Pdia6	Virgin_vs_PP	CA1	0.622109
0.227027	0.0471758	1	Mgat4b	Virgin_vs_PP	CA1	0.564651
0.674934	0.0471523	1	1700020I14Rik	Virgin_vs_PP	CA1	0.862343
0.888512	0.0471488	1	Ralgps1	Virgin_vs_PP	CA1	0.959153
0.530355	0.0471366	1	Cdh2	Virgin_vs_PP	CA1	0.789529
0.159921	0.0471173	1	Lrrc8b	Virgin_vs_PP	CA1	0.481155
0.545982	0.0469224	1	Atp5c1	Virgin_vs_PP	CA1	0.79839
0.282095	0.0469183	1	Unc80	Virgin_vs_PP	CA1	0.617661
0.375915	0.0468953	1	Naca	Virgin_vs_PP	CA1	0.692863
0.320141	0.0468473	1	Atcay	Virgin_vs_PP	CA1	0.648663
0.324329	0.0468242	1	Dgcr6	Virgin_vs_PP	CA1	0.651988
0.0248071	0.0468058	1	2810474O19Rik	Virgin_vs_PP	CA1	0.202173
0.287995	0.0467888	1	Scyl2	Virgin_vs_PP	CA1	0.622553
0.476488	0.0467781	1	Tmem237	Virgin_vs_PP	CA1	0.754189
0.441766	0.0467034	1	Ccpg1os	Virgin_vs_PP	CA1	0.731215
0.722251	0.0466907	1	Rnf214	Virgin_vs_PP	CA1	0.884655
0.603003	0.0465474	1	Smim14	Virgin_vs_PP	CA1	0.831087
0.225058	0.0464341	1	Cyhr1	Virgin_vs_PP	CA1	0.563701
0.625555	0.0463305	1	Azi2	Virgin_vs_PP	CA1	0.843838
0.824994	0.0463167	1	Cep120	Virgin_vs_PP	CA1	0.929689
0.590909	0.0462724	1	Gm15535	Virgin_vs_PP	CA1	0.822597
0.549915	0.0462722	1	Prr7	Virgin_vs_PP	CA1	0.799828
0.720983	0.0462164	1	Usp38	Virgin_vs_PP	CA1	0.884655
0.755731	0.0461508	1	Sprn	Virgin_vs_PP	CA1	0.898741
0.415318	0.046112	1	Lias	Virgin_vs_PP	CA1	0.712926
0.26909	0.0460914	1	Tmem8b	Virgin_vs_PP	CA1	0.605118
0.494711	0.04608	1	Fkbp2	Virgin_vs_PP	CA1	0.769638
0.61651	0.046032	1	Cpne8	Virgin_vs_PP	CA1	0.836977
0.505299	0.0459812	1	Ptpn5	Virgin_vs_PP	CA1	0.775353
0.330953	0.04598	1	Ap1s3	Virgin_vs_PP	CA1	0.657876
0.531523	0.0458298	1	Brox	Virgin_vs_PP	CA1	0.79029
0.290362	0.0457641	1	Stmn4	Virgin_vs_PP	CA1	0.623828
0.747516	0.0457537	1	Wbscr22	Virgin_vs_PP	CA1	0.894409
0.141669	0.0456508	1	Dhrs1	Virgin_vs_PP	CA1	0.455692
0.461985	0.0456352	1	Scamp5	Virgin_vs_PP	CA1	0.745144
0.400616	0.0456229	1	Epb41l1	Virgin_vs_PP	CA1	0.704375
0.457236	0.0456169	1	Lrp1	Virgin_vs_PP	CA1	0.742757
0.803055	0.0455248	1	Sec16a	Virgin_vs_PP	CA1	0.919835
0.846692	0.0455232	1	Wipf2	Virgin_vs_PP	CA1	0.941374
0.381827	0.0454737	1	Matk	Virgin_vs_PP	CA1	0.69386
0.382677	0.0454699	1	Phka2	Virgin_vs_PP	CA1	0.69386
0.442625	0.0454629	1	Pfdn1	Virgin_vs_PP	CA1	0.731813
0.0911683	0.0454372	1	Asb1	Virgin_vs_PP	CA1	0.37567
0.513881	0.0454325	1	Brinp3	Virgin_vs_PP	CA1	0.779444
0.292866	0.0453542	1	Fubp3	Virgin_vs_PP	CA1	0.62662
0.455283	0.0453381	1	Ugcg	Virgin_vs_PP	CA1	0.741886
0.668412	0.0453004	1	Adrb1	Virgin_vs_PP	CA1	0.859184
0.583494	0.0452202	1	Prkcsh	Virgin_vs_PP	CA1	0.816373
0.406085	0.0452146	1	Cyc1	Virgin_vs_PP	CA1	0.707662
0.669604	0.0452086	1	Zfp263	Virgin_vs_PP	CA1	0.859833
0.663671	0.0451855	1	Pak1ip1	Virgin_vs_PP	CA1	0.856909
0.382318	0.0451728	1	Ptov1	Virgin_vs_PP	CA1	0.69386
0.590188	0.0451603	1	Ddx55	Virgin_vs_PP	CA1	0.822335
0.432681	0.0451406	1	Stx5a	Virgin_vs_PP	CA1	0.72515
0.797284	0.0450376	1	Arl5a	Virgin_vs_PP	CA1	0.917908
0.313956	0.0449931	1	Nr2f2	Virgin_vs_PP	CA1	0.645335
0.425355	0.044981	1	Naa25	Virgin_vs_PP	CA1	0.71987
0.281842	0.0449179	1	Ercc4	Virgin_vs_PP	CA1	0.617488
0.533721	0.0449166	1	Rbfox2	Virgin_vs_PP	CA1	0.791356
0.304362	0.0447657	1	Cmip	Virgin_vs_PP	CA1	0.635975
0.2843	0.0447103	1	Bag5	Virgin_vs_PP	CA1	0.62033
0.0955596	0.0446727	1	Usp14	Virgin_vs_PP	CA1	0.381978
0.646982	0.0446626	1	Gpx1	Virgin_vs_PP	CA1	0.853731
0.789561	0.0446579	1	Rab23	Virgin_vs_PP	CA1	0.914721
0.262708	0.044646	1	Tmf1	Virgin_vs_PP	CA1	0.598786
0.371021	0.0446179	1	Celf5	Virgin_vs_PP	CA1	0.687301
0.209947	0.0444756	1	Atg13	Virgin_vs_PP	CA1	0.545139
0.520874	0.0444514	1	Anapc2	Virgin_vs_PP	CA1	0.782768
0.654629	0.0443946	1	Ccdc115	Virgin_vs_PP	CA1	0.854675
0.695623	0.0443869	1	Sec23b	Virgin_vs_PP	CA1	0.873541
0.357493	0.0443211	1	Rab6b	Virgin_vs_PP	CA1	0.679595
0.550577	0.0442808	1	Hsp90b1	Virgin_vs_PP	CA1	0.799828
0.724466	0.044263	1	Gosr1	Virgin_vs_PP	CA1	0.884655
0.578106	0.0442517	1	Slmo2	Virgin_vs_PP	CA1	0.812862
0.00365158	0.0441932	1	Mboat7	Virgin_vs_PP	CA1	0.0660209
0.805748	0.0441743	1	Adcy3	Virgin_vs_PP	CA1	0.921128
0.715757	0.044174	1	Pdcd6ip	Virgin_vs_PP	CA1	0.882642
0.491733	0.0441649	1	Bmpr2	Virgin_vs_PP	CA1	0.7676
0.27912	0.044134	1	Evi5	Virgin_vs_PP	CA1	0.614792
0.725267	0.0441191	1	Gm14698	Virgin_vs_PP	CA1	0.885301
0.848318	0.0437058	1	Dcun1d1	Virgin_vs_PP	CA1	0.942484
0.243957	0.0436287	1	Mfsd4b5	Virgin_vs_PP	CA1	0.579657
0.813866	0.0436282	1	Bend6	Virgin_vs_PP	CA1	0.924826
0.653429	0.0436249	1	Gm21917	Virgin_vs_PP	CA1	0.854675
0.358897	0.0435789	1	Adcy1	Virgin_vs_PP	CA1	0.679629
0.872416	0.0435555	1	Apc	Virgin_vs_PP	CA1	0.953201
0.410441	0.0435114	1	Tmem209	Virgin_vs_PP	CA1	0.708959
0.577637	0.0434151	1	Cops7a	Virgin_vs_PP	CA1	0.812848
0.633249	0.0434095	1	Mfap1b	Virgin_vs_PP	CA1	0.848181
0.805752	0.0434094	1	Cinp	Virgin_vs_PP	CA1	0.921128
0.869822	0.0433858	1	Arf4	Virgin_vs_PP	CA1	0.951409
0.00696059	0.0433773	1	Polr2k	Virgin_vs_PP	CA1	0.0995145
0.372198	0.0433562	1	Smdt1	Virgin_vs_PP	CA1	0.688689
0.357736	0.0432607	1	Fbxl3	Virgin_vs_PP	CA1	0.679617
0.576498	0.0432605	1	Mical2	Virgin_vs_PP	CA1	0.812778
0.446523	0.0432479	1	Txndc15	Virgin_vs_PP	CA1	0.734949
0.572719	0.0431541	1	2610507B11Rik	Virgin_vs_PP	CA1	0.811893
0.199233	0.0431324	1	Nfix	Virgin_vs_PP	CA1	0.534807
0.121745	0.0431297	1	Ube2v1	Virgin_vs_PP	CA1	0.424553
0.550258	0.0429429	1	B230219D22Rik	Virgin_vs_PP	CA1	0.799828
0.491215	0.0429342	1	Ptpn12	Virgin_vs_PP	CA1	0.767588
0.70756	0.0429265	1	Edf1	Virgin_vs_PP	CA1	0.878061
0.577993	0.0427286	1	Rpl32	Virgin_vs_PP	CA1	0.812862
0.110217	0.042712	1	Gm26615	Virgin_vs_PP	CA1	0.405024
0.468757	0.0426091	1	2310061I04Rik	Virgin_vs_PP	CA1	0.749309
0.0140379	0.0424477	1	Dync1h1	Virgin_vs_PP	CA1	0.151074
0.571915	0.0424452	1	Arpp19	Virgin_vs_PP	CA1	0.811434
0.676155	0.0424093	1	Gga2	Virgin_vs_PP	CA1	0.862964
0.74538	0.0423947	1	Uqcrh	Virgin_vs_PP	CA1	0.893804
0.368891	0.0423808	1	Gnl2	Virgin_vs_PP	CA1	0.686361
0.848473	0.0423201	1	Lrrtm4	Virgin_vs_PP	CA1	0.942484
0.105953	0.0422677	1	Wdr89	Virgin_vs_PP	CA1	0.400374
0.537078	0.0422603	1	Kctd20	Virgin_vs_PP	CA1	0.792932
0.117412	0.0421835	1	Nat8f3	Virgin_vs_PP	CA1	0.418834
0.333311	0.0421814	1	Atxn2l	Virgin_vs_PP	CA1	0.660058
0.609533	0.0421208	1	Naa60	Virgin_vs_PP	CA1	0.834293
0.769084	0.0421103	1	Tra2a	Virgin_vs_PP	CA1	0.90623
0.747519	0.0421069	1	Mapk8ip1	Virgin_vs_PP	CA1	0.894409
0.949183	0.0421035	1	Socs5	Virgin_vs_PP	CA1	0.98009
0.734995	0.0420272	1	Rasa1	Virgin_vs_PP	CA1	0.888074
0.359261	0.0420092	1	Pcbp2	Virgin_vs_PP	CA1	0.679629
0.0875701	0.0419519	1	Kcnj2	Virgin_vs_PP	CA1	0.369126
0.759341	0.04192	1	Med16	Virgin_vs_PP	CA1	0.900725
0.563729	0.041915	1	Prrc2b	Virgin_vs_PP	CA1	0.808314
0.708668	0.0418997	1	Rcor1	Virgin_vs_PP	CA1	0.878695
0.798962	0.0418966	1	Top2b	Virgin_vs_PP	CA1	0.917908
0.7449	0.0416891	1	Wdr43	Virgin_vs_PP	CA1	0.893636
0.252075	0.0416461	1	Pick1	Virgin_vs_PP	CA1	0.588242
0.490415	0.0415053	1	Ndufa12	Virgin_vs_PP	CA1	0.76722
0.648297	0.0414798	1	Psma2	Virgin_vs_PP	CA1	0.854594
0.800986	0.0414401	1	Tubb3	Virgin_vs_PP	CA1	0.918539
0.369486	0.0414398	1	Tceal6	Virgin_vs_PP	CA1	0.686512
0.405142	0.0414031	1	Sep15	Virgin_vs_PP	CA1	0.707662
0.481132	0.0412284	1	Gm2824	Virgin_vs_PP	CA1	0.757741
0.947008	0.0412164	1	Atp6v1h	Virgin_vs_PP	CA1	0.979924
0.662281	0.0411447	1	Ftx	Virgin_vs_PP	CA1	0.856817
0.659516	0.0410969	1	Rnf170	Virgin_vs_PP	CA1	0.855478
0.409346	0.0410838	1	Txndc5	Virgin_vs_PP	CA1	0.708488
0.688916	0.0410784	1	Smpd1	Virgin_vs_PP	CA1	0.868871
0.228684	0.0410178	1	Etfdh	Virgin_vs_PP	CA1	0.56555
0.496049	0.0409808	1	Ppp4c	Virgin_vs_PP	CA1	0.770699
0.614358	0.0409804	1	Mrpl34	Virgin_vs_PP	CA1	0.836608
0.521085	0.0409777	1	Klc1	Virgin_vs_PP	CA1	0.782768
0.814796	0.0409607	1	Mbip	Virgin_vs_PP	CA1	0.925525
0.457067	0.0409463	1	Tacc1	Virgin_vs_PP	CA1	0.742757
0.512245	0.0407935	1	Mrps12	Virgin_vs_PP	CA1	0.778548
0.673696	0.0407927	1	Rps18	Virgin_vs_PP	CA1	0.862073
0.89467	0.0407687	1	Siah1a	Virgin_vs_PP	CA1	0.960373
0.733098	0.0406543	1	Clvs1	Virgin_vs_PP	CA1	0.888074
0.76197	0.0404319	1	Dmtf1	Virgin_vs_PP	CA1	0.901583
0.279966	0.0403956	1	Rps17	Virgin_vs_PP	CA1	0.615442
0.752703	0.0403842	1	Eif2ak2	Virgin_vs_PP	CA1	0.897137
0.0936472	0.0403603	1	Igfbp4	Virgin_vs_PP	CA1	0.379237
0.145323	0.0403512	1	Ccm2	Virgin_vs_PP	CA1	0.460829
0.332244	0.0402964	1	Atmin	Virgin_vs_PP	CA1	0.659326
0.516162	0.0401713	1	Prrt2	Virgin_vs_PP	CA1	0.780888
0.276195	0.0401638	1	2210016L21Rik	Virgin_vs_PP	CA1	0.611953
0.321237	0.0401625	1	Gpn1	Virgin_vs_PP	CA1	0.649392
0.52694	0.0401589	1	Gnpda2	Virgin_vs_PP	CA1	0.786861
0.0727566	0.0401384	1	Lpgat1	Virgin_vs_PP	CA1	0.344495
0.721143	0.0400515	1	Btg1	Virgin_vs_PP	CA1	0.884655
0.939637	0.0400258	1	Rasa2	Virgin_vs_PP	CA1	0.977653
0.796852	0.0399645	1	Kmt5a	Virgin_vs_PP	CA1	0.917908
0.751646	0.039959	1	Txndc17	Virgin_vs_PP	CA1	0.897137
0.253023	0.0399337	1	Zfp60	Virgin_vs_PP	CA1	0.58975
0.800776	0.0398596	1	Gxylt2	Virgin_vs_PP	CA1	0.918539
0.638352	0.0397999	1	Ptprk	Virgin_vs_PP	CA1	0.851136
0.724346	0.0397342	1	Pgp	Virgin_vs_PP	CA1	0.884655
0.539322	0.0396856	1	Usp50	Virgin_vs_PP	CA1	0.794194
0.458011	0.0396524	1	Glrx3	Virgin_vs_PP	CA1	0.743034
0.52117	0.0395872	1	Trappc10	Virgin_vs_PP	CA1	0.782768
0.433149	0.0395423	1	Rasal2	Virgin_vs_PP	CA1	0.72515
0.925161	0.0395201	1	Stambp	Virgin_vs_PP	CA1	0.970412
0.684177	0.0394375	1	Man1c1	Virgin_vs_PP	CA1	0.867139
0.622199	0.0394219	1	Zfp12	Virgin_vs_PP	CA1	0.841437
0.598686	0.0393556	1	Eftud2	Virgin_vs_PP	CA1	0.827702
0.522751	0.0392559	1	Ddx27	Virgin_vs_PP	CA1	0.783557
0.549124	0.0391536	1	Men1	Virgin_vs_PP	CA1	0.799828
0.697908	0.0391465	1	Hcfc1r1	Virgin_vs_PP	CA1	0.873541
0.462501	0.0391152	1	Nnat	Virgin_vs_PP	CA1	0.745144
0.144537	0.0390511	1	Crem	Virgin_vs_PP	CA1	0.459826
0.189626	0.0388348	1	Cyp4x1	Virgin_vs_PP	CA1	0.524493
0.628232	0.0387952	1	Iars	Virgin_vs_PP	CA1	0.845703
0.731951	0.0387181	1	Setd2	Virgin_vs_PP	CA1	0.888074
0.836845	0.0386748	1	Mapk9	Virgin_vs_PP	CA1	0.93645
0.621098	0.0386709	1	Ythdf3	Virgin_vs_PP	CA1	0.840721
0.511696	0.0386708	1	A330017A19Rik	Virgin_vs_PP	CA1	0.77813
0.72408	0.0386103	1	Lin7b	Virgin_vs_PP	CA1	0.884655
0.493862	0.0385872	1	Polb	Virgin_vs_PP	CA1	0.768928
0.516134	0.0385115	1	Rpsa	Virgin_vs_PP	CA1	0.780888
0.150844	0.0384744	1	Cyb5b	Virgin_vs_PP	CA1	0.468726
0.16562	0.0384606	1	App	Virgin_vs_PP	CA1	0.48879
0.0707744	0.0384288	1	Ly6h	Virgin_vs_PP	CA1	0.339319
0.153438	0.0383992	1	Huwe1	Virgin_vs_PP	CA1	0.472473
0.558628	0.0383922	1	Txk	Virgin_vs_PP	CA1	0.80552
0.851049	0.0383327	1	Eef1b2	Virgin_vs_PP	CA1	0.943334
0.785912	0.0383165	1	Rbm6	Virgin_vs_PP	CA1	0.912921
0.0948802	0.0382639	1	Arrdc3	Virgin_vs_PP	CA1	0.380705
0.623685	0.0382161	1	Slc45a4	Virgin_vs_PP	CA1	0.84243
0.55046	0.0381643	1	Mapkapk5	Virgin_vs_PP	CA1	0.799828
0.777351	0.0380552	1	Brcc3	Virgin_vs_PP	CA1	0.908763
0.328722	0.0380144	1	Abhd17a	Virgin_vs_PP	CA1	0.655436
0.598802	0.0379796	1	Rpl7	Virgin_vs_PP	CA1	0.827702
0.982508	0.0379264	1	Fam20b	Virgin_vs_PP	CA1	0.992453
0.928653	0.0379219	1	Caln1	Virgin_vs_PP	CA1	0.972246
0.306552	0.0378663	1	Rpl6	Virgin_vs_PP	CA1	0.637628
0.470252	0.0378637	1	Qtrtd1	Virgin_vs_PP	CA1	0.749725
0.613389	0.0378242	1	Rab34	Virgin_vs_PP	CA1	0.83587
0.110133	0.0377882	1	Mmp17	Virgin_vs_PP	CA1	0.405024
0.108511	0.0377851	1	Rpl38	Virgin_vs_PP	CA1	0.40365
0.47678	0.0376755	1	Rnf157	Virgin_vs_PP	CA1	0.754323
0.452633	0.0376747	1	Vta1	Virgin_vs_PP	CA1	0.740086
0.684535	0.0376604	1	Pam	Virgin_vs_PP	CA1	0.867139
0.356693	0.037652	1	Akap1	Virgin_vs_PP	CA1	0.678733
0.356956	0.0376427	1	Cacna1c	Virgin_vs_PP	CA1	0.678794
0.827826	0.0375779	1	Ttc9c	Virgin_vs_PP	CA1	0.930789
0.158205	0.0375737	1	Cmtm4	Virgin_vs_PP	CA1	0.478441
0.141846	0.0375733	1	Ndufa1	Virgin_vs_PP	CA1	0.455692
0.490582	0.0375568	1	Smc2	Virgin_vs_PP	CA1	0.767275
0.338926	0.0375498	1	Clptm1l	Virgin_vs_PP	CA1	0.664508
0.787775	0.0375262	1	Irf2	Virgin_vs_PP	CA1	0.913551
0.654507	0.0375216	1	Pola1	Virgin_vs_PP	CA1	0.854675
0.139039	0.0375134	1	Mrpl45	Virgin_vs_PP	CA1	0.452341
0.783505	0.0374781	1	Zc3h14	Virgin_vs_PP	CA1	0.912019
0.385483	0.0374613	1	Maged1	Virgin_vs_PP	CA1	0.693965
0.323999	0.037375	1	Ube3a	Virgin_vs_PP	CA1	0.651984
0.23389	0.0372693	1	Thoc1	Virgin_vs_PP	CA1	0.568613
0.688003	0.0371845	1	Fam32a	Virgin_vs_PP	CA1	0.868652
0.191227	0.0370356	1	Paics	Virgin_vs_PP	CA1	0.526217
0.374167	0.037018	1	Mau2	Virgin_vs_PP	CA1	0.691281
0.38978	0.0370023	1	Prickle1	Virgin_vs_PP	CA1	0.696577
0.670772	0.0369311	1	1110032F04Rik	Virgin_vs_PP	CA1	0.86058
0.240375	0.0367761	1	Mbnl2	Virgin_vs_PP	CA1	0.576677
0.62927	0.0367128	1	Mirt1	Virgin_vs_PP	CA1	0.846131
0.537749	0.0366919	1	Gm14391	Virgin_vs_PP	CA1	0.793018
0.502882	0.036684	1	Gnptab	Virgin_vs_PP	CA1	0.77461
0.294208	0.0366569	1	Xbp1	Virgin_vs_PP	CA1	0.627214
0.451856	0.0365559	1	Mdga2	Virgin_vs_PP	CA1	0.73979
0.40474	0.0365502	1	Eif1ax	Virgin_vs_PP	CA1	0.707662
0.484764	0.0364804	1	Rnf38	Virgin_vs_PP	CA1	0.761217
0.696282	0.0364149	1	Ssbp3	Virgin_vs_PP	CA1	0.873541
0.627133	0.0363579	1	Slc26a4	Virgin_vs_PP	CA1	0.844804
0.595042	0.0362785	1	Ranbp1	Virgin_vs_PP	CA1	0.825583
0.7904	0.0362324	1	Rtfdc1	Virgin_vs_PP	CA1	0.915331
0.51663	0.0360862	1	Tgfbrap1	Virgin_vs_PP	CA1	0.780997
0.61485	0.0360519	1	Syt5	Virgin_vs_PP	CA1	0.836957
0.795333	0.0360194	1	2810403A07Rik	Virgin_vs_PP	CA1	0.917237
0.179604	0.0359655	1	Mydgf	Virgin_vs_PP	CA1	0.509833
0.638888	0.0359487	1	Msl1	Virgin_vs_PP	CA1	0.851242
0.483184	0.0359357	1	Pan3	Virgin_vs_PP	CA1	0.759859
0.385189	0.0359224	1	Zfp120	Virgin_vs_PP	CA1	0.69386
0.667711	0.0359184	1	Aldh3a2	Virgin_vs_PP	CA1	0.858527
0.819546	0.035848	1	Hpcal1	Virgin_vs_PP	CA1	0.927305
0.311639	0.0357998	1	Brinp2	Virgin_vs_PP	CA1	0.643937
0.602661	0.0357365	1	Nucb1	Virgin_vs_PP	CA1	0.831081
0.890145	0.0357292	1	Uimc1	Virgin_vs_PP	CA1	0.95921
0.576549	0.0357071	1	Ctdnep1	Virgin_vs_PP	CA1	0.812778
0.352925	0.035704	1	Ilf2	Virgin_vs_PP	CA1	0.676161
0.462244	0.0356312	1	Nr2c2	Virgin_vs_PP	CA1	0.745144
0.520206	0.0356011	1	2610002M06Rik	Virgin_vs_PP	CA1	0.782768
0.703146	0.0355372	1	Cnksr2	Virgin_vs_PP	CA1	0.876518
0.14796	0.0354961	1	Tcf4	Virgin_vs_PP	CA1	0.464594
0.157507	0.035467	1	Btaf1	Virgin_vs_PP	CA1	0.477561
0.574184	0.0354454	1	Zfp617	Virgin_vs_PP	CA1	0.812029
0.358647	0.0354002	1	Marc2	Virgin_vs_PP	CA1	0.679629
0.385365	0.0354	1	Anp32a	Virgin_vs_PP	CA1	0.693963
0.72161	0.0353802	1	Gcn1l1	Virgin_vs_PP	CA1	0.884655
0.696371	0.0353734	1	Ndufs6	Virgin_vs_PP	CA1	0.873541
0.276664	0.0353448	1	Cmas	Virgin_vs_PP	CA1	0.612308
0.176075	0.0353412	1	Prpf38a	Virgin_vs_PP	CA1	0.505677
0.417506	0.0352144	1	Slc38a1	Virgin_vs_PP	CA1	0.713816
0.72306	0.0352006	1	Git2	Virgin_vs_PP	CA1	0.884655
0.529086	0.0351402	1	Dscam	Virgin_vs_PP	CA1	0.788825
0.637029	0.0351067	1	Nudt19	Virgin_vs_PP	CA1	0.849945
0.1048	0.0350905	1	Dguok	Virgin_vs_PP	CA1	0.39832
0.611134	0.0350061	1	Fut8	Virgin_vs_PP	CA1	0.835122
0.654277	0.0349916	1	Mnt	Virgin_vs_PP	CA1	0.854675
0.368473	0.0349432	1	Ccdc30	Virgin_vs_PP	CA1	0.686361
0.662538	0.0345989	1	Ormdl3	Virgin_vs_PP	CA1	0.856817
0.863528	0.0345506	1	Chrnb2	Virgin_vs_PP	CA1	0.948961
0.478856	0.0345449	1	Btbd3	Virgin_vs_PP	CA1	0.755778
0.425773	0.0344989	1	Tubb5	Virgin_vs_PP	CA1	0.719914
0.604693	0.0344919	1	Rsbn1	Virgin_vs_PP	CA1	0.831839
0.651859	0.0344499	1	Decr2	Virgin_vs_PP	CA1	0.854675
0.502835	0.034348	1	Snf8	Virgin_vs_PP	CA1	0.77461
0.805247	0.0342847	1	Bcl11a	Virgin_vs_PP	CA1	0.921118
0.595294	0.0342576	1	BC030499	Virgin_vs_PP	CA1	0.825583
0.213952	0.0342194	1	Rab11fip5	Virgin_vs_PP	CA1	0.550188
0.0687032	0.0340928	1	Gm4924	Virgin_vs_PP	CA1	0.335299
0.880717	0.0340573	1	Clip3	Virgin_vs_PP	CA1	0.955695
0.216556	0.0340526	1	Letm1	Virgin_vs_PP	CA1	0.553013
0.635118	0.0340417	1	Eif2ak3	Virgin_vs_PP	CA1	0.848557
0.40676	0.0339635	1	Scn1a	Virgin_vs_PP	CA1	0.707764
0.599094	0.0339388	1	Rpia	Virgin_vs_PP	CA1	0.82791
0.703333	0.0339089	1	Heatr6	Virgin_vs_PP	CA1	0.876518
0.628718	0.033864	1	4921523L03Rik	Virgin_vs_PP	CA1	0.84592
0.121007	0.0338603	1	Ctf2	Virgin_vs_PP	CA1	0.423237
0.159071	0.0338554	1	Pptc7	Virgin_vs_PP	CA1	0.480141
0.0997425	0.0338409	1	Zkscan3	Virgin_vs_PP	CA1	0.389686
0.746223	0.0338151	1	Tmem87b	Virgin_vs_PP	CA1	0.894311
0.690067	0.0337979	1	Chd3os	Virgin_vs_PP	CA1	0.869949
0.209831	0.0337845	1	Ankrd11	Virgin_vs_PP	CA1	0.545079
0.73921	0.0337801	1	Ndufaf7	Virgin_vs_PP	CA1	0.889717
0.44903	0.0337446	1	Bicd1	Virgin_vs_PP	CA1	0.737217
0.744074	0.0336761	1	Ccdc34	Virgin_vs_PP	CA1	0.893375
0.861432	0.0336387	1	Rundc3a	Virgin_vs_PP	CA1	0.947366
0.0923706	0.0335722	1	Nmnat2	Virgin_vs_PP	CA1	0.378038
0.97878	0.033517	1	Trpm7	Virgin_vs_PP	CA1	0.990843
0.135477	0.0334307	1	Aldh7a1	Virgin_vs_PP	CA1	0.447744
0.74764	0.0334072	1	Fabp5	Virgin_vs_PP	CA1	0.894409
0.279626	0.0333834	1	Ccpg1	Virgin_vs_PP	CA1	0.615155
0.613837	0.0332348	1	Crls1	Virgin_vs_PP	CA1	0.836287
0.938782	0.0331995	1	Smarca5	Virgin_vs_PP	CA1	0.977371
0.47506	0.0331625	1	Ago4	Virgin_vs_PP	CA1	0.752819
0.583598	0.0331294	1	Acbd6	Virgin_vs_PP	CA1	0.816373
0.526352	0.0331265	1	Sos2	Virgin_vs_PP	CA1	0.786183
0.831054	0.0331159	1	Birc6	Virgin_vs_PP	CA1	0.932635
0.437111	0.0331063	1	Scap	Virgin_vs_PP	CA1	0.727834
0.732412	0.0330349	1	Foxk2	Virgin_vs_PP	CA1	0.888074
0.801614	0.0330177	1	Hibadh	Virgin_vs_PP	CA1	0.918901
[truncated: 3,877 more rows]

## Sheet: CA1 E18vsPP
p_val	avg_log2FC	p_val_adj	gene	comparison	celltype	fdr
2.25043e-05	0.465414	0.534477	Nrep	E18_vs_PP	CA1	0.00203543
3.10005e-06	0.409744	0.0736261	Plp1	E18_vs_PP	CA1	0.000423841
8.27308e-09	0.400786	0.000196486	Gm9493	E18_vs_PP	CA1	3.74134e-06
4.18522e-06	0.363219	0.0993989	mt-Nd3	E18_vs_PP	CA1	0.000546776
5.19501e-05	0.360827	1	Ptn	E18_vs_PP	CA1	0.00386601
1.09597e-06	0.336341	0.0260292	Mal	E18_vs_PP	CA1	0.000190071
2.9795e-05	0.326897	0.707631	Clstn3	E18_vs_PP	CA1	0.00257595
6.31573e-08	0.326633	0.00149999	Sprn	E18_vs_PP	CA1	2.06279e-05
4.64729e-05	0.320669	1	Bmpr2	E18_vs_PP	CA1	0.00359493
2.61639e-17	0.318541	6.21394e-13	Tmsb4x	E18_vs_PP	CA1	7.69089e-14
2.31867e-06	0.312207	0.0550683	Rps27rt	E18_vs_PP	CA1	0.000338973
6.2169e-07	0.307177	0.0147651	Rpl27a	E18_vs_PP	CA1	0.000146197
2.07531e-08	0.29823	0.000492886	mt-Nd4	E18_vs_PP	CA1	8.13383e-06
3.86533e-16	0.292883	9.18016e-12	Eef1a1	E18_vs_PP	CA1	7.57476e-13
5.57513e-10	0.288184	1.32409e-05	mt-Co2	E18_vs_PP	CA1	4.09703e-07
8.16011e-06	0.287362	0.193803	Rpl37a	E18_vs_PP	CA1	0.000959466
7.33753e-06	0.284577	0.174266	Rps7	E18_vs_PP	CA1	0.000898694
8.48373e-06	0.279387	0.201489	Cldn11	E18_vs_PP	CA1	0.000977957
1.12229e-05	0.277751	0.266544	Kif5c	E18_vs_PP	CA1	0.00115753
1.26754e-09	0.274355	3.01041e-05	Fth1	E18_vs_PP	CA1	7.67539e-07
3.96342e-06	0.271925	0.0941312	Rps14	E18_vs_PP	CA1	0.000529567
0.000122915	0.267477	1	Cend1	E18_vs_PP	CA1	0.00793012
8.4425e-05	0.264211	1	mt-Nd1	E18_vs_PP	CA1	0.00583923
1.09924e-06	0.263089	0.0261069	Ncald	E18_vs_PP	CA1	0.000190071
0.000106537	0.262072	1	Tmem63b	E18_vs_PP	CA1	0.00711738
1.14329e-10	0.257024	2.71531e-06	Ttf1	E18_vs_PP	CA1	1.34428e-07
0.000103047	0.245879	1	Lrrc17	E18_vs_PP	CA1	0.00696336
3.45885e-09	0.244922	8.21476e-05	Igfbp4	E18_vs_PP	CA1	1.69455e-06
1.83903e-10	0.243156	4.36769e-06	Dlgap1	E18_vs_PP	CA1	1.80194e-07
8.45482e-07	0.241008	0.0200802	Atp6v1a	E18_vs_PP	CA1	0.000165147
8.98044e-06	0.240499	0.213285	Hpgds	E18_vs_PP	CA1	0.00101412
3.2429e-05	0.238703	0.770188	Rps19	E18_vs_PP	CA1	0.00272357
3.59884e-05	0.228426	0.854725	1700020I14Rik	E18_vs_PP	CA1	0.0028983
6.78732e-07	0.223164	0.0161199	mt-Cytb	E18_vs_PP	CA1	0.000151689
9.1424e-06	0.220599	0.217132	2010300C02Rik	E18_vs_PP	CA1	0.00101412
6.03311e-05	0.210729	1	Rpl23	E18_vs_PP	CA1	0.00432545
6.21168e-11	0.21039	1.47527e-06	Rab6a	E18_vs_PP	CA1	9.12962e-08
2.91691e-07	0.205716	0.00692766	mt-Atp6	E18_vs_PP	CA1	7.97894e-05
3.7707e-05	0.204002	0.895541	Napb	E18_vs_PP	CA1	0.00295573
6.68007e-06	0.192476	0.158652	Rps3a1	E18_vs_PP	CA1	0.000835577
0.000125447	0.191101	1	Tspan2	E18_vs_PP	CA1	0.00793012
0.000131649	0.188584	1	Atxn7l3b	E18_vs_PP	CA1	0.00823369
2.98583e-07	0.187487	0.00709134	mt-Co1	E18_vs_PP	CA1	7.97894e-05
6.9268e-05	0.180086	1	Ndrg3	E18_vs_PP	CA1	0.00484793
1.10807e-05	0.163908	0.263168	Ppp3r1	E18_vs_PP	CA1	0.00115753
6.31804e-05	0.163808	1	Mal2	E18_vs_PP	CA1	0.00447515
0.000160559	0.160977	1	Mt1	E18_vs_PP	CA1	0.00963189
2.2852e-05	0.158842	0.542734	Syt1	E18_vs_PP	CA1	0.00203556
9.1313e-07	0.144805	0.0216868	Ppp3ca	E18_vs_PP	CA1	0.000167759
2.15846e-05	0.143238	0.512634	Rtn1	E18_vs_PP	CA1	0.00203543
3.42442e-05	0.10251	0.8133	Rbms1	E18_vs_PP	CA1	0.00283552
0.000113619	-0.0536415	1	Nol12	E18_vs_PP	CA1	0.00750526
1.03692e-05	-0.0602245	0.246268	Hsd3b2	E18_vs_PP	CA1	0.00112889
3.22367e-08	-0.166655	0.000765623	Snhg11	E18_vs_PP	CA1	1.11482e-05
2.18971e-05	-0.16873	0.520057	Chd1	E18_vs_PP	CA1	0.00203543
5.89053e-05	-0.170231	1	D10Wsu102e	E18_vs_PP	CA1	0.00431969
4.92425e-10	-0.178983	1.16951e-05	Gria2	E18_vs_PP	CA1	4.09703e-07
0.000115107	-0.187225	1	Astn1	E18_vs_PP	CA1	0.00751904
1.4176e-05	-0.193498	0.336681	Ttc14	E18_vs_PP	CA1	0.00143691
0.000142704	-0.205069	1	Gt(ROSA)26Sor	E18_vs_PP	CA1	0.00864901
2.1718e-05	-0.211558	0.515801	Slc5a3	E18_vs_PP	CA1	0.00203543
3.56265e-07	-0.216062	0.0084613	Aplp1	E18_vs_PP	CA1	8.72702e-05
3.66401e-05	-0.227092	0.870203	Ntrk3	E18_vs_PP	CA1	0.00291091
1.40294e-06	-0.228485	0.0333198	R3hdm1	E18_vs_PP	CA1	0.000222916
0.000135645	-0.230895	1	Far1	E18_vs_PP	CA1	0.0083943
2.95419e-05	-0.238972	0.70162	Kcnn2	E18_vs_PP	CA1	0.00257595
1.50168e-05	-0.241868	0.35665	Ptprn	E18_vs_PP	CA1	0.00149634
3.50501e-05	-0.245142	0.832441	Schip1	E18_vs_PP	CA1	0.00286194
1.06257e-05	-0.248189	0.25236	Dubr	E18_vs_PP	CA1	0.00113579
2.24296e-05	-0.25084	0.532703	Homer1	E18_vs_PP	CA1	0.00203543
5.17862e-05	-0.253553	1	Usp40	E18_vs_PP	CA1	0.00386601
3.2043e-05	-0.255881	0.761021	Clk4	E18_vs_PP	CA1	0.00272357
0.000140331	-0.258684	1	Nin	E18_vs_PP	CA1	0.00859384
5.95161e-05	-0.259667	1	Dusp11	E18_vs_PP	CA1	0.00431969
2.38605e-06	-0.261634	0.0566688	Hnrnpa2b1	E18_vs_PP	CA1	0.000338973
2.21749e-08	-0.264438	0.000526655	Tra2a	E18_vs_PP	CA1	8.1479e-06
1.73003e-06	-0.264895	0.0410883	Slc44a5	E18_vs_PP	CA1	0.000267654
3.34868e-07	-0.274099	0.00795312	Zranb2	E18_vs_PP	CA1	8.55953e-05
5.04654e-06	-0.277217	0.119855	Tenm4	E18_vs_PP	CA1	0.00064497
7.35833e-07	-0.277383	0.017476	A330023F24Rik	E18_vs_PP	CA1	0.000154499
4.74192e-05	-0.280491	1	A830008E24Rik	E18_vs_PP	CA1	0.00362049
1.81315e-07	-0.292018	0.00430622	Oxr1	E18_vs_PP	CA1	5.32974e-05
1.74005e-05	-0.292482	0.413263	Grin2b	E18_vs_PP	CA1	0.00170496
6.96649e-07	-0.295625	0.0165454	Clk1	E18_vs_PP	CA1	0.000151689
7.74618e-07	-0.300001	0.0183972	Rbm39	E18_vs_PP	CA1	0.000157034
0.000101865	-0.300274	1	Slc20a1	E18_vs_PP	CA1	0.00696336
2.03566e-06	-0.301062	0.0483469	Rnf165	E18_vs_PP	CA1	0.000306863
1.30556e-09	-0.302357	3.1007e-05	Etnk1	E18_vs_PP	CA1	7.67539e-07
9.43157e-09	-0.313125	0.000224	Wsb1	E18_vs_PP	CA1	3.96058e-06
8.70822e-07	-0.315716	0.020682	Fyco1	E18_vs_PP	CA1	0.000165147
7.77723e-06	-0.316168	0.184709	Qrich1	E18_vs_PP	CA1	0.000933109
1.14311e-06	-0.323951	0.0271489	Zbtb20	E18_vs_PP	CA1	0.00019201
9.87589e-08	-0.336138	0.00234552	Srsf11	E18_vs_PP	CA1	3.05581e-05
0.000125367	-0.340831	1	Dcn	E18_vs_PP	CA1	0.00793012
2.42164e-06	-0.351532	0.057514	Dmxl1	E18_vs_PP	CA1	0.000338973
1.18205e-06	-0.358482	0.0280738	Enpp2	E18_vs_PP	CA1	0.000193036
2.21595e-09	-0.430449	5.26288e-05	Exd2	E18_vs_PP	CA1	1.18432e-06
2.21416e-17	-0.469881	5.25863e-13	Ttr	E18_vs_PP	CA1	7.69089e-14
0.000190802	0.283596	1	Atp5l	E18_vs_PP	CA1	0.0113305
0.000199696	-0.14492	1	Suv420h1	E18_vs_PP	CA1	0.0117402
0.000206239	0.2078	1	Golga3	E18_vs_PP	CA1	0.0120047
0.00021346	0.208331	1	Camk2a	E18_vs_PP	CA1	0.0123033
0.000220642	0.242434	1	Fzr1	E18_vs_PP	CA1	0.0124858
0.000220874	0.221424	1	Kcnj4	E18_vs_PP	CA1	0.0124858
0.000234126	0.182325	1	Rpl34	E18_vs_PP	CA1	0.0129154
0.000236546	-0.245021	1	Gm17494	E18_vs_PP	CA1	0.0129154
0.00023714	0.229355	1	Gabra5	E18_vs_PP	CA1	0.0129154
0.000237263	-0.204592	1	Nbea	E18_vs_PP	CA1	0.0129154
0.000247191	-0.224386	1	Ccnl2	E18_vs_PP	CA1	0.0132804
0.000248485	-0.197186	1	Arglu1	E18_vs_PP	CA1	0.0132804
0.000264912	0.268139	1	Rpl18	E18_vs_PP	CA1	0.014013
0.00026905	-0.235902	1	G530011O06Rik	E18_vs_PP	CA1	0.014013
0.000269344	0.312284	1	Mef2c	E18_vs_PP	CA1	0.014013
0.000282744	-0.215365	1	Zmym6	E18_vs_PP	CA1	0.0145812
0.000290497	0.236723	1	Rps24	E18_vs_PP	CA1	0.0148507
0.000295992	-0.236773	1	Fbxl5	E18_vs_PP	CA1	0.0150012
0.000305596	-0.128662	1	Yme1l1	E18_vs_PP	CA1	0.0153555
0.00031505	0.266819	1	Sema5a	E18_vs_PP	CA1	0.0156964
0.000346334	0.225599	1	Rpl12	E18_vs_PP	CA1	0.0171101
0.000353902	0.175326	1	Tpt1	E18_vs_PP	CA1	0.0172614
0.00035527	0.309064	1	Rprml	E18_vs_PP	CA1	0.0172614
0.000373506	0.228458	1	Pfkm	E18_vs_PP	CA1	0.0179987
0.000376739	-0.295953	1	Camk2d	E18_vs_PP	CA1	0.0180069
0.000388157	-0.243007	1	Elk1	E18_vs_PP	CA1	0.018403
0.000395608	0.268736	1	Tspan7	E18_vs_PP	CA1	0.0186062
0.000403939	0.228641	1	Cox6c	E18_vs_PP	CA1	0.0188473
0.000422674	0.196599	1	Tmod2	E18_vs_PP	CA1	0.0195661
0.000434061	-0.157635	1	Hsp90aa1	E18_vs_PP	CA1	0.0199363
0.000452969	-0.22063	1	Creg2	E18_vs_PP	CA1	0.0206435
0.000468844	0.165145	1	BC051077	E18_vs_PP	CA1	0.0212026
0.000483705	0.130996	1	Gabra1	E18_vs_PP	CA1	0.0215532
0.000485791	0.207007	1	Rps16	E18_vs_PP	CA1	0.0215532
0.000487595	-0.185732	1	Gm4117	E18_vs_PP	CA1	0.0215532
0.000510644	0.156671	1	Ywhab	E18_vs_PP	CA1	0.0224036
0.000561419	-0.230847	1	Tmem106b	E18_vs_PP	CA1	0.0244488
0.000579716	-0.262819	1	Rnf150	E18_vs_PP	CA1	0.0250599
0.000612702	0.235317	1	Rplp1	E18_vs_PP	CA1	0.0262925
0.000625298	-0.244995	1	Bdnf	E18_vs_PP	CA1	0.0266386
0.000633509	0.154947	1	Gabarapl1	E18_vs_PP	CA1	0.0267943
0.000648302	0.141118	1	Camk2b	E18_vs_PP	CA1	0.027224
0.000662544	-0.20487	1	Sik2	E18_vs_PP	CA1	0.0276248
0.000698083	-0.253743	1	Pcdh15	E18_vs_PP	CA1	0.0286635
0.00070134	-0.148829	1	Mycbp2	E18_vs_PP	CA1	0.0286635
0.000702194	-0.191526	1	Maats1	E18_vs_PP	CA1	0.0286635
0.000706958	-0.231202	1	Rbm28	E18_vs_PP	CA1	0.0286635
0.000712713	-0.171753	1	Bicd1	E18_vs_PP	CA1	0.0286989
0.00078302	0.122814	1	Chn1	E18_vs_PP	CA1	0.0313155
0.000797694	-0.265324	1	Tmtc4	E18_vs_PP	CA1	0.0316868
0.000866925	0.235527	1	Adgrb2	E18_vs_PP	CA1	0.033775
0.000869303	0.221072	1	Ckb	E18_vs_PP	CA1	0.033775
0.000869476	-0.245015	1	Ssr3	E18_vs_PP	CA1	0.033775
0.000873244	0.233667	1	Srcin1	E18_vs_PP	CA1	0.033775
0.000892142	0.147113	1	Prkaca	E18_vs_PP	CA1	0.0342804
0.000916917	-0.175768	1	Cttnbp2	E18_vs_PP	CA1	0.0348392
0.000918536	0.21915	1	1110032F04Rik	E18_vs_PP	CA1	0.0348392
0.0009458	-0.152821	1	Snhg14	E18_vs_PP	CA1	0.0356433
0.000953838	0.0638857	1	Prkce	E18_vs_PP	CA1	0.0357173
0.000989342	-0.20084	1	Sec61a2	E18_vs_PP	CA1	0.0368123
0.00101238	-0.235728	1	Gls	E18_vs_PP	CA1	0.0374326
0.00104517	-0.185656	1	Pvr	E18_vs_PP	CA1	0.0382633
0.00104882	-0.222217	1	Ypel3	E18_vs_PP	CA1	0.0382633
0.00105437	-0.185169	1	Pom121	E18_vs_PP	CA1	0.0382633
0.00106639	0.206731	1	Ppp2r1a	E18_vs_PP	CA1	0.0384619
0.00107294	0.209647	1	Kcnq5	E18_vs_PP	CA1	0.0384623
0.00108669	0.192839	1	Tubb3	E18_vs_PP	CA1	0.0387191
0.00109979	-0.207128	1	Snx13	E18_vs_PP	CA1	0.0389497
0.00114165	-0.173111	1	9930111J21Rik2	E18_vs_PP	CA1	0.0400369
0.00114716	0.203089	1	Dck	E18_vs_PP	CA1	0.0400369
0.00115092	0.163533	1	Eif4a2	E18_vs_PP	CA1	0.0400369
0.00118742	0.147485	1	Tor1b	E18_vs_PP	CA1	0.0410318
0.00119372	0.198887	1	Upf3a	E18_vs_PP	CA1	0.0410318
0.00120046	0.187583	1	Tomm7	E18_vs_PP	CA1	0.0410318
0.00121583	0.159973	1	Synrg	E18_vs_PP	CA1	0.041317
0.00124597	0.121656	1	Fam49b	E18_vs_PP	CA1	0.0419405
0.00124844	-0.206657	1	Coq2	E18_vs_PP	CA1	0.0419405
0.00126521	0.183836	1	Arhgef25	E18_vs_PP	CA1	0.0420561
0.00126619	0.195982	1	Arf3	E18_vs_PP	CA1	0.0420561
0.00127464	0.211192	1	Frs3	E18_vs_PP	CA1	0.0420989
0.00129441	-0.220065	1	Mir124a-1hg	E18_vs_PP	CA1	0.042513
0.00131897	0.141309	1	Syp	E18_vs_PP	CA1	0.0430791
0.001342	0.200826	1	Vsnl1	E18_vs_PP	CA1	0.0434334
0.0013446	0.111126	1	Chtop	E18_vs_PP	CA1	0.0434334
0.0013668	-0.240649	1	Paxbp1	E18_vs_PP	CA1	0.0439093
0.00140456	-0.153534	1	Hook1	E18_vs_PP	CA1	0.0448772
0.00142186	-0.161629	1	Gm42669	E18_vs_PP	CA1	0.045047
0.0014252	0.271068	1	Arap2	E18_vs_PP	CA1	0.045047
0.00145502	0.0733739	1	Rptor	E18_vs_PP	CA1	0.0457436
0.00146676	-0.211324	1	Stx16	E18_vs_PP	CA1	0.0458675
0.00151123	-0.0683563	1	Gm26682	E18_vs_PP	CA1	0.0468855
0.00151526	-0.169791	1	Thsd7b	E18_vs_PP	CA1	0.0468855
0.001538	-0.0151433	1	Meg3	E18_vs_PP	CA1	0.0470891
0.00154428	-0.22681	1	Klhl7	E18_vs_PP	CA1	0.0470891
0.00154587	-0.0349059	1	Foxp2	E18_vs_PP	CA1	0.0470891
0.00164971	0.220646	1	Lamtor2	E18_vs_PP	CA1	0.049993
0.00171699	-0.227139	1	Zcchc7	E18_vs_PP	CA1	0.0517652
0.00174448	-0.234902	1	Bsn	E18_vs_PP	CA1	0.0522162
0.00175046	-0.248782	1	Htatsf1	E18_vs_PP	CA1	0.0522162
0.0017586	-0.203981	1	Wdr31	E18_vs_PP	CA1	0.0522162
0.00177831	-0.234798	1	Pcnx4	E18_vs_PP	CA1	0.052536
0.00181786	0.131807	1	Abhd3	E18_vs_PP	CA1	0.0534361
0.00190255	0.14144	1	Unc13d	E18_vs_PP	CA1	0.0556472
0.00191773	0.176716	1	Nrn1	E18_vs_PP	CA1	0.0558135
0.0019772	-0.146754	1	Itm2c	E18_vs_PP	CA1	0.057261
0.00200926	0.172885	1	Psap	E18_vs_PP	CA1	0.0579042
0.00202357	0.172602	1	Sep15	E18_vs_PP	CA1	0.0580321
0.00205068	0.187433	1	Cox5a	E18_vs_PP	CA1	0.0584747
0.0020589	0.218533	1	Tubb4b	E18_vs_PP	CA1	0.0584747
0.00207621	-0.167701	1	Crebbp	E18_vs_PP	CA1	0.0586242
0.00208411	0.175652	1	Tspyl1	E18_vs_PP	CA1	0.0586242
0.00214497	0.180152	1	Hspa8	E18_vs_PP	CA1	0.0598097
0.0021466	0.168637	1	Adcy1	E18_vs_PP	CA1	0.0598097
0.00215911	-0.204537	1	Snrpb	E18_vs_PP	CA1	0.0598747
0.00220175	-0.160504	1	Fam178a	E18_vs_PP	CA1	0.0607704
0.00221273	-0.223964	1	Usp48	E18_vs_PP	CA1	0.060788
0.00223586	0.0754459	1	Pfdn2	E18_vs_PP	CA1	0.0611377
0.00225341	0.144876	1	Vdac1	E18_vs_PP	CA1	0.0613323
0.00227012	-0.156074	1	Ddx5	E18_vs_PP	CA1	0.0614972
0.00228038	-0.0873973	1	Pofut1	E18_vs_PP	CA1	0.0614972
0.00229588	0.0869552	1	Plpp6	E18_vs_PP	CA1	0.0616324
0.00231131	0.147244	1	Chchd2	E18_vs_PP	CA1	0.0617646
0.00238064	-0.165386	1	Mest	E18_vs_PP	CA1	0.0633178
0.00239098	0.229538	1	Pld3	E18_vs_PP	CA1	0.0633178
0.00244595	0.198074	1	Rplp2	E18_vs_PP	CA1	0.0644832
0.00246363	-0.152356	1	Tia1	E18_vs_PP	CA1	0.0646593
0.00249191	-0.164413	1	Gm44591	E18_vs_PP	CA1	0.0651108
0.00250306	0.121428	1	Fam131a	E18_vs_PP	CA1	0.0651127
0.0025453	0.229716	1	Zfp322a	E18_vs_PP	CA1	0.0657272
0.00255538	0.2023	1	Ola1	E18_vs_PP	CA1	0.0657272
0.00256148	0.195763	1	Gmpr	E18_vs_PP	CA1	0.0657272
0.0025714	-0.138409	1	Fxyd6	E18_vs_PP	CA1	0.0657272
0.00261716	-0.235174	1	Wdr13	E18_vs_PP	CA1	0.0666074
0.00266458	-0.201859	1	Hsp90b1	E18_vs_PP	CA1	0.0675217
0.00269416	0.1864	1	Als2	E18_vs_PP	CA1	0.0679784
0.00272239	-0.0322224	1	Tmem209	E18_vs_PP	CA1	0.0683702
0.00273295	0.158	1	Pfn2	E18_vs_PP	CA1	0.0683702
0.00280431	0.0760934	1	Adtrp	E18_vs_PP	CA1	0.0696436
0.00280952	0.37507	1	Slc17a6	E18_vs_PP	CA1	0.0696436
0.00281939	0.154978	1	Enc1	E18_vs_PP	CA1	0.0696436
0.00285545	-0.170924	1	Cenpc1	E18_vs_PP	CA1	0.0702392
0.00292548	-0.191681	1	Gpt2	E18_vs_PP	CA1	0.0713166
0.00293153	0.117587	1	Prrt2	E18_vs_PP	CA1	0.0713166
0.00293812	0.189775	1	Camk2n1	E18_vs_PP	CA1	0.0713166
0.00294777	0.172321	1	Grik5	E18_vs_PP	CA1	0.0713166
0.00300809	0.195176	1	Minos1	E18_vs_PP	CA1	0.0721999
0.00300884	0.181433	1	Fem1b	E18_vs_PP	CA1	0.0721999
0.00302356	0.159032	1	Sema7a	E18_vs_PP	CA1	0.0722581
0.00303918	0.197849	1	Ddb1	E18_vs_PP	CA1	0.0723073
0.0030559	0.149538	1	Tubb2a	E18_vs_PP	CA1	0.0723073
0.00306251	0.0895568	1	Blmh	E18_vs_PP	CA1	0.0723073
0.00309533	0.211314	1	AI593442	E18_vs_PP	CA1	0.0727898
0.00311419	-0.214221	1	1500011B03Rik	E18_vs_PP	CA1	0.0729416
0.00313348	-0.212103	1	Kctd6	E18_vs_PP	CA1	0.0731021
0.00318079	0.330731	1	Rgs4	E18_vs_PP	CA1	0.0739125
0.00321826	0.186133	1	Map2k1	E18_vs_PP	CA1	0.0744887
0.00326757	0.238865	1	Cspg5	E18_vs_PP	CA1	0.0753335
0.00328667	-0.131861	1	Sun1	E18_vs_PP	CA1	0.0754779
0.00337264	0.182066	1	Sec11c	E18_vs_PP	CA1	0.0771508
0.00338953	-0.0720372	1	Mir124-2hg	E18_vs_PP	CA1	0.0772367
0.0034247	-0.0360819	1	Tvp23b	E18_vs_PP	CA1	0.0774446
0.003425	-0.0897841	1	Unc45a	E18_vs_PP	CA1	0.0774446
0.00344111	-0.184124	1	Acer3	E18_vs_PP	CA1	0.0775108
0.00351239	0.123728	1	Zhx1	E18_vs_PP	CA1	0.0787774
0.00352414	-0.169222	1	4921524J17Rik	E18_vs_PP	CA1	0.0787774
0.00356311	-0.183356	1	Scg2	E18_vs_PP	CA1	0.0793467
0.00359198	0.2031	1	2010107E04Rik	E18_vs_PP	CA1	0.0796877
0.00362136	-0.218612	1	Msantd2	E18_vs_PP	CA1	0.0800375
0.00367629	-0.153552	1	Mfsd8	E18_vs_PP	CA1	0.080873
0.00368668	-0.194525	1	Krit1	E18_vs_PP	CA1	0.080873
0.00371399	0.0391748	1	Wscd2	E18_vs_PP	CA1	0.0811693
0.00382385	-0.227799	1	Glt8d2	E18_vs_PP	CA1	0.0832608
0.00386064	-0.208975	1	Btbd10	E18_vs_PP	CA1	0.0837517
0.00389113	0.205875	1	Rpl26	E18_vs_PP	CA1	0.0841028
0.00395898	-0.136223	1	Nvl	E18_vs_PP	CA1	0.0852559
0.00398806	-0.00746385	1	Sel1l	E18_vs_PP	CA1	0.0854098
0.00399518	-0.157472	1	Zmym5	E18_vs_PP	CA1	0.0854098
0.00403354	0.0686114	1	Mettl9	E18_vs_PP	CA1	0.0854543
0.00404171	-0.232026	1	Tubgcp5	E18_vs_PP	CA1	0.0854543
0.00404948	0.17033	1	P3h3	E18_vs_PP	CA1	0.0854543
0.00407865	-0.127109	1	Vezt	E18_vs_PP	CA1	0.0854543
0.00408255	0.157728	1	Cpsf2	E18_vs_PP	CA1	0.0854543
0.00409196	0.0627243	1	Sparcl1	E18_vs_PP	CA1	0.0854543
0.00409901	0.196605	1	Rpl39	E18_vs_PP	CA1	0.0854543
0.0041598	-0.127803	1	Abcg1	E18_vs_PP	CA1	0.0863792
0.00417277	0.0713837	1	Shroom2	E18_vs_PP	CA1	0.0863792
0.00419048	0.0498075	1	Pou3f1	E18_vs_PP	CA1	0.0864416
0.00424791	-0.237068	1	Odf2l	E18_vs_PP	CA1	0.0873197
0.00439829	-0.129023	1	Camkk1	E18_vs_PP	CA1	0.090096
0.00446287	0.248056	1	Btbd3	E18_vs_PP	CA1	0.0911014
0.00449129	0.188938	1	Zyg11b	E18_vs_PP	CA1	0.0911834
0.0044979	-0.192653	1	Atg16l1	E18_vs_PP	CA1	0.0911834
0.00472373	-0.193105	1	Afg3l2	E18_vs_PP	CA1	0.0954323
0.00477055	-0.0546335	1	Gm43740	E18_vs_PP	CA1	0.0960482
0.00482826	0.198876	1	Klhl23	E18_vs_PP	CA1	0.0968783
0.00491744	0.15213	1	Thy1	E18_vs_PP	CA1	0.098332
0.00499153	-0.0395292	1	Cd300lf	E18_vs_PP	CA1	0.0994223
0.00500578	-0.152846	1	Gm10125	E18_vs_PP	CA1	0.0994223
0.00506334	-0.0280849	1	Trnt1	E18_vs_PP	CA1	0.100227
0.00515417	-0.0829293	1	Zdhhc17	E18_vs_PP	CA1	0.101622
0.00517173	0.206688	1	Dlc1	E18_vs_PP	CA1	0.101622
0.00518568	0.187336	1	Stmn3	E18_vs_PP	CA1	0.101622
0.00523782	-0.220042	1	Itga4	E18_vs_PP	CA1	0.102169
0.00524835	0.0390053	1	Cplx2	E18_vs_PP	CA1	0.102169
0.00529586	0.202241	1	Dnajc6	E18_vs_PP	CA1	0.10268
0.00530953	-0.0983913	1	Cyfip1	E18_vs_PP	CA1	0.10268
0.00534698	-0.214385	1	Adcyap1r1	E18_vs_PP	CA1	0.102812
0.00535131	-0.144654	1	Fubp1	E18_vs_PP	CA1	0.102812
0.00546008	-0.137834	1	2810474O19Rik	E18_vs_PP	CA1	0.10456
0.00569024	-0.110392	1	Myo18a	E18_vs_PP	CA1	0.108593
0.00570764	-0.182814	1	Rnpc3	E18_vs_PP	CA1	0.108593
0.00573525	-0.166439	1	6330403A02Rik	E18_vs_PP	CA1	0.108766
0.00577303	0.200285	1	Rps13	E18_vs_PP	CA1	0.109131
0.00581696	0.185672	1	Rps8	E18_vs_PP	CA1	0.109609
0.00586596	0.0942839	1	Atp1b1	E18_vs_PP	CA1	0.110179
0.00591486	0.185588	1	Rps27a	E18_vs_PP	CA1	0.110584
0.00592513	-0.197052	1	Ubxn4	E18_vs_PP	CA1	0.110584
0.0060057	0.115282	1	Rps20	E18_vs_PP	CA1	0.111733
0.00618244	0.164437	1	Gad1	E18_vs_PP	CA1	0.114658
0.00631654	0.125457	1	Neurod6	E18_vs_PP	CA1	0.116776
0.00636599	0.17718	1	Tpi1	E18_vs_PP	CA1	0.117184
0.00641127	-0.0837278	1	Itpk1	E18_vs_PP	CA1	0.117184
0.00641421	-0.180852	1	Gm43536	E18_vs_PP	CA1	0.117184
0.00642288	0.149525	1	Cox8a	E18_vs_PP	CA1	0.117184
0.00643825	-0.220541	1	Msmo1	E18_vs_PP	CA1	0.117184
0.00648955	-0.224773	1	Kpna4	E18_vs_PP	CA1	0.117613
0.00651107	-0.178884	1	Gdap1	E18_vs_PP	CA1	0.117613
0.00652186	0.145479	1	Manea	E18_vs_PP	CA1	0.117613
0.0065988	0.159735	1	Copb2	E18_vs_PP	CA1	0.118476
0.00661428	-0.141103	1	Zfp950	E18_vs_PP	CA1	0.118476
0.00663146	-0.189686	1	Npy1r	E18_vs_PP	CA1	0.118476
0.00665031	-0.167895	1	Scfd2	E18_vs_PP	CA1	0.118476
0.00677338	0.20686	1	Atp5j	E18_vs_PP	CA1	0.120174
0.00679923	0.143214	1	Pja2	E18_vs_PP	CA1	0.120174
0.00681361	0.193119	1	mt-Co3	E18_vs_PP	CA1	0.120174
0.00682739	0.0101825	1	Fn1	E18_vs_PP	CA1	0.120174
0.00689973	0.230198	1	Rnf2	E18_vs_PP	CA1	0.120835
0.00690602	0.141937	1	Rplp0	E18_vs_PP	CA1	0.120835
0.00696664	0.107987	1	Tspan13	E18_vs_PP	CA1	0.120858
0.00701335	0.17944	1	Zfp281	E18_vs_PP	CA1	0.120858
0.00701854	-0.16971	1	Kctd4	E18_vs_PP	CA1	0.120858
0.00703696	-0.200553	1	Dzip1	E18_vs_PP	CA1	0.120858
0.00704327	-0.217546	1	Lsm14a	E18_vs_PP	CA1	0.120858
0.00704638	-0.180753	1	Clec16a	E18_vs_PP	CA1	0.120858
0.00705126	-0.14076	1	Hnrnph1	E18_vs_PP	CA1	0.120858
0.00716854	-0.151878	1	Khsrp	E18_vs_PP	CA1	0.122511
0.00720577	0.132242	1	Fam171b	E18_vs_PP	CA1	0.122791
0.00735363	0.201672	1	Nefm	E18_vs_PP	CA1	0.124948
0.00738142	-0.148597	1	Abi1	E18_vs_PP	CA1	0.124957
0.00739665	0.187595	1	Cd34	E18_vs_PP	CA1	0.124957
0.00750044	0.142552	1	Nfkb1	E18_vs_PP	CA1	0.126347
0.0075733	-0.138041	1	Sec22b	E18_vs_PP	CA1	0.127021
0.00760014	-0.207743	1	4632427E13Rik	E18_vs_PP	CA1	0.127021
0.00760526	-0.156197	1	Lcorl	E18_vs_PP	CA1	0.127021
0.00762733	0.185035	1	Uqcr11	E18_vs_PP	CA1	0.127029
0.00767813	-0.194499	1	Rbm12b2	E18_vs_PP	CA1	0.127097
0.00768735	-0.130285	1	Spock2	E18_vs_PP	CA1	0.127097
0.00771162	-0.0338287	1	Arxes1	E18_vs_PP	CA1	0.127097
0.00772178	-0.182862	1	Rtn4rl1	E18_vs_PP	CA1	0.127097
0.00773951	-0.165446	1	Rif1	E18_vs_PP	CA1	0.127097
0.00776677	-0.201032	1	Pias2	E18_vs_PP	CA1	0.12713
0.0077848	0.0926993	1	Gpm6a	E18_vs_PP	CA1	0.12713
0.00781113	-0.224392	1	Thoc2	E18_vs_PP	CA1	0.127207
0.00787097	0.12369	1	Rhou	E18_vs_PP	CA1	0.127827
0.00792944	-0.111578	1	Nabp1	E18_vs_PP	CA1	0.128422
0.00796999	-0.165158	1	Ccdc30	E18_vs_PP	CA1	0.128724
0.00806604	0.212188	1	Tox	E18_vs_PP	CA1	0.129918
0.0081188	-0.148554	1	Cx3cr1	E18_vs_PP	CA1	0.130364
0.00814429	0.148198	1	Myl12b	E18_vs_PP	CA1	0.130364
0.00818038	-0.0792879	1	1810037I17Rik	E18_vs_PP	CA1	0.130364
0.00819342	-0.16627	1	Fibcd1	E18_vs_PP	CA1	0.130364
0.00820455	0.203941	1	Eif4g2	E18_vs_PP	CA1	0.130364
0.00844207	0.160817	1	Rps4x	E18_vs_PP	CA1	0.133291
0.00844687	0.065403	1	Cwc15	E18_vs_PP	CA1	0.133291
0.00845681	0.0901471	1	Degs1	E18_vs_PP	CA1	0.133291
0.0085462	-0.0873187	1	Snhg4	E18_vs_PP	CA1	0.13434
0.00865859	-0.0908137	1	D10Jhu81e	E18_vs_PP	CA1	0.135542
0.00866879	-0.214106	1	Mfsd14a	E18_vs_PP	CA1	0.135542
0.0087287	0.159912	1	Mlf2	E18_vs_PP	CA1	0.136117
0.00876941	-0.195832	1	Zc3h7a	E18_vs_PP	CA1	0.13639
0.00880199	0.142269	1	Mt2	E18_vs_PP	CA1	0.136535
0.00886023	-0.181971	1	Papola	E18_vs_PP	CA1	0.136781
0.00886438	0.173845	1	Mcoln1	E18_vs_PP	CA1	0.136781
0.00899909	0.177719	1	Lpcat1	E18_vs_PP	CA1	0.138496
0.00910608	-0.12795	1	Map3k7	E18_vs_PP	CA1	0.139777
0.00916356	0.196307	1	Rpl13	E18_vs_PP	CA1	0.140293
0.0092078	-0.0427126	1	Gm4924	E18_vs_PP	CA1	0.14054
0.00922751	0.188744	1	Aes	E18_vs_PP	CA1	0.14054
0.00926928	-0.196432	1	Rtf1	E18_vs_PP	CA1	0.140673
0.00928411	-0.214426	1	Klf10	E18_vs_PP	CA1	0.140673
0.00944982	-0.15931	1	Hspa5	E18_vs_PP	CA1	0.142323
0.00947341	-0.177652	1	Zkscan1	E18_vs_PP	CA1	0.142323
0.0094779	-0.0152679	1	Vma21	E18_vs_PP	CA1	0.142323
0.0094919	0.119428	1	Rps21	E18_vs_PP	CA1	0.142323
0.0095271	-0.0887381	1	Zcchc2	E18_vs_PP	CA1	0.142323
0.00953826	-0.171545	1	Pcnx	E18_vs_PP	CA1	0.142323
0.00973749	0.0293381	1	Prkag1	E18_vs_PP	CA1	0.144928
0.00976528	0.206213	1	Acsl5	E18_vs_PP	CA1	0.14494
0.00979373	0.166421	1	2700029M09Rik	E18_vs_PP	CA1	0.14494
0.00981223	0.152685	1	Tpst2	E18_vs_PP	CA1	0.14494
0.0098616	-0.0594806	1	Snw1	E18_vs_PP	CA1	0.145304
0.00993817	-0.17647	1	Ppfia2	E18_vs_PP	CA1	0.146066
0.00997389	0.170348	1	Camk2g	E18_vs_PP	CA1	0.146226
0.0101376	0.140847	1	Fam19a1	E18_vs_PP	CA1	0.148256
0.0101705	0.16828	1	Rpl24	E18_vs_PP	CA1	0.148369
0.0102118	-0.184606	1	Ctage5	E18_vs_PP	CA1	0.148601
0.0102956	0.175867	1	mt-Nd5	E18_vs_PP	CA1	0.149452
0.0103455	-0.0274063	1	Sec11a	E18_vs_PP	CA1	0.149606
0.0103571	0.158611	1	Pdgfb	E18_vs_PP	CA1	0.149606
0.0103959	-0.120041	1	Laptm4b	E18_vs_PP	CA1	0.149677
0.010413	0.217737	1	Nat8l	E18_vs_PP	CA1	0.149677
0.010519	-0.142597	1	Mfsd4b5	E18_vs_PP	CA1	0.150832
0.0106465	0.121955	1	Ywhah	E18_vs_PP	CA1	0.151527
0.0106722	-0.136808	1	Nktr	E18_vs_PP	CA1	0.151527
0.0106784	-0.141106	1	Otub2	E18_vs_PP	CA1	0.151527
0.0106828	-0.0985368	1	Acad9	E18_vs_PP	CA1	0.151527
0.0106963	-0.19808	1	Arhgap17	E18_vs_PP	CA1	0.151527
0.0108407	0.233425	1	Tgs1	E18_vs_PP	CA1	0.153069
0.0108696	0.242542	1	Stmn1	E18_vs_PP	CA1	0.153069
0.0108833	0.0950243	1	Mfn2	E18_vs_PP	CA1	0.153069
0.0109511	-0.198249	1	Dicer1	E18_vs_PP	CA1	0.153655
0.0109922	0.144679	1	Exosc2	E18_vs_PP	CA1	0.153865
0.0111506	-0.187582	1	Cystm1	E18_vs_PP	CA1	0.155097
0.0111513	-0.0721579	1	Dkk3	E18_vs_PP	CA1	0.155097
0.0111594	-0.0749068	1	Galnt14	E18_vs_PP	CA1	0.155097
0.0112502	0.14004	1	Ptk2b	E18_vs_PP	CA1	0.155313
0.0112636	0.187617	1	Trim32	E18_vs_PP	CA1	0.155313
0.0112782	0.154912	1	Flna	E18_vs_PP	CA1	0.155313
0.0112806	0.130347	1	Dnajc7	E18_vs_PP	CA1	0.155313
0.0113198	-0.190324	1	Sec22a	E18_vs_PP	CA1	0.155488
0.0115095	-0.203611	1	Sox11	E18_vs_PP	CA1	0.157726
0.0115924	-0.187535	1	H13	E18_vs_PP	CA1	0.158492
0.011624	-0.135802	1	Ankfy1	E18_vs_PP	CA1	0.158546
0.0116502	0.182531	1	Cand1	E18_vs_PP	CA1	0.158546
0.0116772	-0.199068	1	Ccser2	E18_vs_PP	CA1	0.158546
0.0117109	0.159684	1	Eif3e	E18_vs_PP	CA1	0.158637
0.0117631	-0.178711	1	Srsf1	E18_vs_PP	CA1	0.158978
0.0118606	0.207447	1	Selt	E18_vs_PP	CA1	0.159927
0.0119201	-0.187595	1	Ankib1	E18_vs_PP	CA1	0.160362
0.0120479	-0.210682	1	Dcun1d4	E18_vs_PP	CA1	0.161555
0.0120638	-0.102323	1	Son	E18_vs_PP	CA1	0.161555
0.0121635	-0.0842123	1	Pvt1	E18_vs_PP	CA1	0.162521
0.0123255	-0.180421	1	Fsd1l	E18_vs_PP	CA1	0.164015
0.0123311	0.169614	1	Psmd9	E18_vs_PP	CA1	0.164015
0.0124899	0.223073	1	Diras2	E18_vs_PP	CA1	0.165696
0.0125139	-0.181113	1	Tceal5	E18_vs_PP	CA1	0.165696
0.0125933	0.139488	1	Rps25	E18_vs_PP	CA1	0.166156
0.0126051	0.172476	1	Efhd2	E18_vs_PP	CA1	0.166156
0.0127513	0.0900229	1	Erc2	E18_vs_PP	CA1	0.167707
0.0129148	-0.112412	1	Gm19331	E18_vs_PP	CA1	0.169478
0.012946	-0.147457	1	Cnr1	E18_vs_PP	CA1	0.16951
0.0130496	0.16022	1	Slc17a7	E18_vs_PP	CA1	0.16982
0.0130716	0.0606056	1	Sh3bgrl	E18_vs_PP	CA1	0.16982
0.0131305	0.181679	1	Dlat	E18_vs_PP	CA1	0.16982
0.0131566	0.1363	1	Slc1a2	E18_vs_PP	CA1	0.16982
0.0131972	-0.19653	1	Vbp1	E18_vs_PP	CA1	0.16982
0.0131995	-0.0536744	1	Cd200r3	E18_vs_PP	CA1	0.16982
0.0132012	0.0886975	1	Ddx39	E18_vs_PP	CA1	0.16982
0.0132281	0.19579	1	Rusc1	E18_vs_PP	CA1	0.16982
0.0132498	0.196877	1	Sdhc	E18_vs_PP	CA1	0.16982
0.0132586	-0.116863	1	Gm26691	E18_vs_PP	CA1	0.16982
0.0133028	-0.213714	1	Tcerg1	E18_vs_PP	CA1	0.170016
0.0133866	0.11091	1	Gapdh	E18_vs_PP	CA1	0.170716
0.013473	0.121493	1	Lmo3	E18_vs_PP	CA1	0.171166
0.0134801	0.0738325	1	Rps6	E18_vs_PP	CA1	0.171166
0.0136727	-0.115479	1	Lrp8	E18_vs_PP	CA1	0.173237
0.0137036	-0.167551	1	Nnat	E18_vs_PP	CA1	0.173254
0.0137689	-0.0559623	1	Sparc	E18_vs_PP	CA1	0.173707
0.0138309	0.147129	1	Rpl19	E18_vs_PP	CA1	0.174115
0.0139027	-0.143687	1	BC005561	E18_vs_PP	CA1	0.174645
0.0139566	0.0879603	1	Actb	E18_vs_PP	CA1	0.174948
0.0141567	-0.152175	1	Cstf3	E18_vs_PP	CA1	0.176909
0.0141826	-0.172381	1	Pcdh19	E18_vs_PP	CA1	0.176909
0.0142032	-0.19039	1	Tm9sf2	E18_vs_PP	CA1	0.176909
0.0143112	0.144747	1	Ywhaz	E18_vs_PP	CA1	0.17763
0.0143216	0.0878583	1	Hnrnpa1	E18_vs_PP	CA1	0.17763
0.0143838	-0.168107	1	Rab10os	E18_vs_PP	CA1	0.177809
0.0143965	-0.179636	1	Luc7l2	E18_vs_PP	CA1	0.177809
0.0144777	-0.134287	1	Zfp488	E18_vs_PP	CA1	0.178436
0.0145632	0.119742	1	Gm13056	E18_vs_PP	CA1	0.179115
0.0146197	-0.140104	1	Xrn2	E18_vs_PP	CA1	0.179435
0.0146751	-0.135699	1	Ammecr1l	E18_vs_PP	CA1	0.17964
0.0146975	-0.167978	1	Hist3h2a	E18_vs_PP	CA1	0.17964
0.0147507	0.149338	1	Lmo4	E18_vs_PP	CA1	0.179916
0.0148666	-0.10173	1	Lzts3	E18_vs_PP	CA1	0.180737
0.0148795	0.163459	1	Atic	E18_vs_PP	CA1	0.180737
0.0152508	-0.143021	1	Rbm5	E18_vs_PP	CA1	0.184865
0.0153158	-0.117824	1	Tmem43	E18_vs_PP	CA1	0.185271
0.0156913	-0.159423	1	Ddx18	E18_vs_PP	CA1	0.189423
0.0157527	-0.174949	1	Chka	E18_vs_PP	CA1	0.189665
0.0157759	0.144778	1	Trf	E18_vs_PP	CA1	0.189665
0.0159376	-0.163382	1	Psip1	E18_vs_PP	CA1	0.190969
0.0159493	0.171334	1	Cby1	E18_vs_PP	CA1	0.190969
0.0159927	-0.151732	1	Rhox8	E18_vs_PP	CA1	0.1911
0.0162139	-0.200576	1	Epha3	E18_vs_PP	CA1	0.19335
0.0162956	0.127255	1	Anapc2	E18_vs_PP	CA1	0.193931
0.016359	0.0579906	1	Tex261	E18_vs_PP	CA1	0.194292
0.0165184	0.0708756	1	Ptms	E18_vs_PP	CA1	0.195362
0.0165374	0.196987	1	Dnajb5	E18_vs_PP	CA1	0.195362
0.0165488	0.133184	1	Dstn	E18_vs_PP	CA1	0.195362
0.0165869	-0.127281	1	4931406P16Rik	E18_vs_PP	CA1	0.195419
0.016681	-0.13587	1	Ranbp3	E18_vs_PP	CA1	0.195447
0.0166951	-0.0507143	1	Suds3	E18_vs_PP	CA1	0.195447
0.0167079	-0.164157	1	Calb1	E18_vs_PP	CA1	0.195447
0.0167388	-0.155639	1	Zfp292	E18_vs_PP	CA1	0.195447
0.0167726	-0.16695	1	Map4k5	E18_vs_PP	CA1	0.195447
0.0167887	0.187499	1	Sult4a1	E18_vs_PP	CA1	0.195447
0.0168534	-0.151047	1	Trank1	E18_vs_PP	CA1	0.195812
0.0169168	0.101804	1	Pde1b	E18_vs_PP	CA1	0.196161
0.0169875	-0.11964	1	9530059O14Rik	E18_vs_PP	CA1	0.196594
0.0171361	0.178925	1	H3f3b	E18_vs_PP	CA1	0.197924
0.0172102	0.159663	1	Cox4i1	E18_vs_PP	CA1	0.19839
0.017311	-0.180536	1	Tmem263	E18_vs_PP	CA1	0.199161
0.0174679	-0.155139	1	Ercc6l2	E18_vs_PP	CA1	0.200291
0.0174802	0.13702	1	Pianp	E18_vs_PP	CA1	0.200291
0.0175318	0.143602	1	Capzb	E18_vs_PP	CA1	0.200291
0.0175455	-0.169061	1	Lcor	E18_vs_PP	CA1	0.200291
0.0176551	-0.0702841	1	Cwc25	E18_vs_PP	CA1	0.201152
0.0177863	0.113113	1	Arf1	E18_vs_PP	CA1	0.202255
0.0179934	0.225623	1	Rab11fip5	E18_vs_PP	CA1	0.204215
0.018171	-0.0451645	1	Mbtps1	E18_vs_PP	CA1	0.205503
0.0181768	-0.217373	1	Atxn7	E18_vs_PP	CA1	0.205503
0.0182849	-0.171072	1	Ppip5k1	E18_vs_PP	CA1	0.2062
0.0183086	-0.130936	1	Per3	E18_vs_PP	CA1	0.2062
0.0187278	-0.0761549	1	Snx10	E18_vs_PP	CA1	0.210518
0.0187818	-0.183813	1	Ankrd12	E18_vs_PP	CA1	0.210722
0.0190987	-0.0464083	1	Ophn1	E18_vs_PP	CA1	0.213869
0.0191428	0.0975434	1	Atp6v0c	E18_vs_PP	CA1	0.213955
0.0193659	-0.152794	1	Terf1	E18_vs_PP	CA1	0.215956
0.0193953	0.113069	1	Glul	E18_vs_PP	CA1	0.215956
0.0195228	0.115422	1	Nxpe3	E18_vs_PP	CA1	0.216966
0.0196182	-0.124879	1	Herc1	E18_vs_PP	CA1	0.21759
0.0196875	0.0358262	1	Focad	E18_vs_PP	CA1	0.21759
0.0196901	0.102869	1	Tspan5	E18_vs_PP	CA1	0.21759
0.0197701	-0.187901	1	Fnbp1	E18_vs_PP	CA1	0.218064
0.0199398	-0.0598439	1	Nfx1	E18_vs_PP	CA1	0.21922
0.0200256	-0.165345	1	Xbp1	E18_vs_PP	CA1	0.21922
0.0200366	0.163327	1	Smg5	E18_vs_PP	CA1	0.21922
0.0200435	-0.0790276	1	Spata5l1	E18_vs_PP	CA1	0.21922
0.0200613	-0.140007	1	Setd2	E18_vs_PP	CA1	0.21922
0.0201349	-0.168188	1	Tmem161b	E18_vs_PP	CA1	0.219263
0.0202006	-0.152708	1	Ftx	E18_vs_PP	CA1	0.219263
0.0202161	0.136087	1	Rab3a	E18_vs_PP	CA1	0.219263
0.0202242	-0.069404	1	Ubr3	E18_vs_PP	CA1	0.219263
0.0202517	-0.11309	1	Top3b	E18_vs_PP	CA1	0.219263
0.0204022	0.0542326	1	Prrc2b	E18_vs_PP	CA1	0.220486
0.0206129	0.111995	1	Foxg1	E18_vs_PP	CA1	0.222194
0.0206358	0.160185	1	Skp1a	E18_vs_PP	CA1	0.222194
0.0206829	0.183446	1	Eef1g	E18_vs_PP	CA1	0.222294
0.0207393	-0.126648	1	Pkia	E18_vs_PP	CA1	0.222451
0.0207732	0.135094	1	Sfxn1	E18_vs_PP	CA1	0.222451
0.020888	0.10642	1	Usp2	E18_vs_PP	CA1	0.222735
0.0210063	0.140477	1	Rpl36	E18_vs_PP	CA1	0.222735
0.0210158	0.0336419	1	Rasd1	E18_vs_PP	CA1	0.222735
0.02103	-0.0761474	1	Egln1	E18_vs_PP	CA1	0.222735
0.0210751	-0.14925	1	Mxd4	E18_vs_PP	CA1	0.222735
0.0211038	-0.157063	1	Zfp451	E18_vs_PP	CA1	0.222735
0.02114	0.12102	1	Pptc7	E18_vs_PP	CA1	0.222735
0.0211473	-0.0735681	1	Ube3c	E18_vs_PP	CA1	0.222735
0.0211746	0.149124	1	Rpl3	E18_vs_PP	CA1	0.222735
0.0212387	0.143628	1	Arhgef9	E18_vs_PP	CA1	0.222735
0.0212449	0.15831	1	Rps3	E18_vs_PP	CA1	0.222735
0.0212544	0.145926	1	Rnf10	E18_vs_PP	CA1	0.222735
0.0213415	-0.162299	1	Npc1	E18_vs_PP	CA1	0.222983
0.0213539	0.168664	1	Zfp512	E18_vs_PP	CA1	0.222983
0.0214695	-0.0866262	1	Vmn1r58	E18_vs_PP	CA1	0.223593
0.0215408	0.143278	1	Atp6v0b	E18_vs_PP	CA1	0.223593
0.0215759	0.142	1	Tmem229a	E18_vs_PP	CA1	0.223593
0.021588	0.181663	1	Prps1	E18_vs_PP	CA1	0.223593
0.0216315	-0.164738	1	Shprh	E18_vs_PP	CA1	0.223593
0.0217188	-0.161469	1	Hars2	E18_vs_PP	CA1	0.223593
0.0217692	-0.0994179	1	Unc80	E18_vs_PP	CA1	0.223593
0.0218013	0.144287	1	Rpl15	E18_vs_PP	CA1	0.223593
0.0218092	-0.0320971	1	Yipf4	E18_vs_PP	CA1	0.223593
0.0218452	0.126058	1	Rbm22	E18_vs_PP	CA1	0.223593
0.021881	-0.140936	1	Rab9	E18_vs_PP	CA1	0.223593
0.021921	-0.119811	1	Slitrk3	E18_vs_PP	CA1	0.223593
0.0219595	-0.169279	1	Brwd1	E18_vs_PP	CA1	0.223593
0.021979	0.179083	1	Taldo1	E18_vs_PP	CA1	0.223593
0.0219828	-0.157629	1	Sorbs2	E18_vs_PP	CA1	0.223593
0.0221652	-0.17407	1	Zbtb11	E18_vs_PP	CA1	0.224424
0.0221698	-0.174379	1	Mtf2	E18_vs_PP	CA1	0.224424
0.0222391	-0.128889	1	Rnf141	E18_vs_PP	CA1	0.224424
0.0222492	-0.151972	1	Erlin1	E18_vs_PP	CA1	0.224424
0.0222553	-0.16854	1	Lrfn5	E18_vs_PP	CA1	0.224424
0.0223032	0.175557	1	Tmem191c	E18_vs_PP	CA1	0.224522
0.0224487	0.118269	1	Wdr7	E18_vs_PP	CA1	0.2256
0.0226801	0.00436021	1	Cox7a2l	E18_vs_PP	CA1	0.227537
0.022891	-0.171794	1	Mid1	E18_vs_PP	CA1	0.229261
0.022964	0.0482461	1	Rpl30	E18_vs_PP	CA1	0.229601
0.0230564	-0.166585	1	Pdia6	E18_vs_PP	CA1	0.230133
0.0233196	-0.132943	1	Yars	E18_vs_PP	CA1	0.232132
0.0233553	-0.158072	1	Pcnp	E18_vs_PP	CA1	0.232132
0.0233751	0.087919	1	Nsg2	E18_vs_PP	CA1	0.232132
0.0234467	-0.136398	1	Hnrnpk	E18_vs_PP	CA1	0.23245
0.0235797	0.152239	1	Rps15a	E18_vs_PP	CA1	0.233221
0.0236038	0.19933	1	Tbr1	E18_vs_PP	CA1	0.233221
0.0238001	-0.177806	1	Rasl10a	E18_vs_PP	CA1	0.234767
0.0239222	0.166798	1	Ufc1	E18_vs_PP	CA1	0.235412
0.0239457	-0.085631	1	Lhx5	E18_vs_PP	CA1	0.235412
0.0240172	0.197036	1	Itsn1	E18_vs_PP	CA1	0.235721
0.0240931	-0.127922	1	4921523L03Rik	E18_vs_PP	CA1	0.236072
0.02414	0.164154	1	Trim33	E18_vs_PP	CA1	0.236138
0.0242339	-0.154345	1	Rev1	E18_vs_PP	CA1	0.236663
0.0242804	-0.128924	1	Arhgef18	E18_vs_PP	CA1	0.236724
0.024624	-0.142961	1	Zcchc11	E18_vs_PP	CA1	0.239676
0.0246869	-0.170649	1	Amn1	E18_vs_PP	CA1	0.239891
0.0247457	0.158031	1	Odc1	E18_vs_PP	CA1	0.240066
0.0249507	-0.154965	1	Uimc1	E18_vs_PP	CA1	0.241656
0.0250542	-0.2133	1	Pcmtd2	E18_vs_PP	CA1	0.24226
0.0253805	-0.156478	1	Vipas39	E18_vs_PP	CA1	0.245012
0.0254406	0.111894	1	Pnmal2	E18_vs_PP	CA1	0.245189
0.0255291	0.139402	1	Ppp1r1a	E18_vs_PP	CA1	0.24532
0.0255516	0.206016	1	Trim37	E18_vs_PP	CA1	0.24532
0.0255794	0.107505	1	Sdhb	E18_vs_PP	CA1	0.24532
0.0257073	-0.144282	1	Naa16	E18_vs_PP	CA1	0.245429
0.0257271	-0.104886	1	Pick1	E18_vs_PP	CA1	0.245429
0.0257287	-0.139313	1	4930511M06Rik	E18_vs_PP	CA1	0.245429
0.0257577	-0.179836	1	Pum2	E18_vs_PP	CA1	0.245429
0.0258965	-0.162011	1	Tmem255a	E18_vs_PP	CA1	0.245841
0.0259003	0.168663	1	Eif3a	E18_vs_PP	CA1	0.245841
0.0259264	0.153197	1	Chmp4b	E18_vs_PP	CA1	0.245841
0.0260134	-0.162979	1	Lman2l	E18_vs_PP	CA1	0.246269
0.0261299	-0.131303	1	Nipbl	E18_vs_PP	CA1	0.246329
0.0261677	0.146002	1	Nefl	E18_vs_PP	CA1	0.246329
0.0261862	-0.141004	1	Apol6	E18_vs_PP	CA1	0.246329
0.0262125	-0.110523	1	Btaf1	E18_vs_PP	CA1	0.246329
0.0262515	0.0526616	1	mt-Nd2	E18_vs_PP	CA1	0.246329
0.0262711	-0.141801	1	Tnfrsf19	E18_vs_PP	CA1	0.246329
0.0263299	-0.0648111	1	Dpp10	E18_vs_PP	CA1	0.246486
0.0264803	0.158804	1	Tmem50a	E18_vs_PP	CA1	0.247341
0.026547	-0.1359	1	Dagla	E18_vs_PP	CA1	0.247341
0.0265474	-0.15248	1	Frmd4a	E18_vs_PP	CA1	0.247341
0.0267037	-0.160178	1	Copz1	E18_vs_PP	CA1	0.247697
0.0267146	0.156527	1	Grb2	E18_vs_PP	CA1	0.247697
0.0267308	-0.0325115	1	Arhgap12	E18_vs_PP	CA1	0.247697
0.0267541	-0.158091	1	Chordc1	E18_vs_PP	CA1	0.247697
0.0269093	-0.143096	1	Fezf2	E18_vs_PP	CA1	0.248742
0.0270131	0.176864	1	Cggbp1	E18_vs_PP	CA1	0.249309
0.027057	0.175862	1	Akap2	E18_vs_PP	CA1	0.249323
0.0272144	-0.135689	1	Kdm5b	E18_vs_PP	CA1	0.250381
0.0273331	0.219357	1	Rab12	E18_vs_PP	CA1	0.25108
0.0274318	0.135228	1	Borcs7	E18_vs_PP	CA1	0.251593
0.0275363	0.1719	1	Klf9	E18_vs_PP	CA1	0.252154
0.0276447	0.198186	1	Csnk1e	E18_vs_PP	CA1	0.252154
0.0276873	-0.0519955	1	Rassf1	E18_vs_PP	CA1	0.252154
0.0276919	0.186336	1	Ndufa4	E18_vs_PP	CA1	0.252154
0.0277198	0.164042	1	Rpl8	E18_vs_PP	CA1	0.252154
0.0277502	0.17789	1	Hnrnpa0	E18_vs_PP	CA1	0.252154
0.0280089	0.109358	1	Exph5	E18_vs_PP	CA1	0.253871
0.0280439	-0.0994505	1	Glt8d1	E18_vs_PP	CA1	0.253871
0.0280688	0.0972674	1	Glrx	E18_vs_PP	CA1	0.253871
0.0281514	0.15014	1	Ankrd34a	E18_vs_PP	CA1	0.254053
0.0281753	0.0383642	1	Ndfip2	E18_vs_PP	CA1	0.254053
0.0282612	-0.148523	1	Dido1	E18_vs_PP	CA1	0.254143
0.0282988	-0.151747	1	Kansl1	E18_vs_PP	CA1	0.254143
0.028315	-0.147665	1	Ablim2	E18_vs_PP	CA1	0.254143
0.0284053	0.228025	1	Sgta	E18_vs_PP	CA1	0.254565
0.0285037	-0.165037	1	Epc1	E18_vs_PP	CA1	0.255058
0.0286492	-0.143254	1	Recql	E18_vs_PP	CA1	0.255971
0.0287089	-0.124183	1	Nptx1	E18_vs_PP	CA1	0.255971
0.0287364	-0.0733983	1	Sub1	E18_vs_PP	CA1	0.255971
0.0288253	-0.16495	1	Ubr2	E18_vs_PP	CA1	0.256028
0.0288298	-0.106876	1	Pea15a	E18_vs_PP	CA1	0.256028
0.0290597	-0.105011	1	4930402H24Rik	E18_vs_PP	CA1	0.257681
0.0292034	0.131359	1	Tbc1d9	E18_vs_PP	CA1	0.258564
0.0293055	0.167159	1	Cxx1a	E18_vs_PP	CA1	0.258767
0.0293143	-0.0401707	1	Mylip	E18_vs_PP	CA1	0.258767
0.0296566	0.0333957	1	Cript	E18_vs_PP	CA1	0.261396
0.0298011	0.011649	1	Sidt1	E18_vs_PP	CA1	0.262108
0.0298706	0.154099	1	Bckdk	E18_vs_PP	CA1	0.262108
0.0299088	-0.121851	1	Echs1	E18_vs_PP	CA1	0.262108
0.0299555	0.15658	1	Sh3bp5	E18_vs_PP	CA1	0.262108
0.0299612	0.143179	1	Tmx2	E18_vs_PP	CA1	0.262108
0.0300049	-0.14897	1	Smpd4	E18_vs_PP	CA1	0.262108
0.0301129	-0.0981312	1	Syne1	E18_vs_PP	CA1	0.262661
0.0301586	-0.159798	1	Ankrd11	E18_vs_PP	CA1	0.262671
0.0303798	-0.0835802	1	Ypel5	E18_vs_PP	CA1	0.264206
0.0305005	0.14541	1	Fbxw11	E18_vs_PP	CA1	0.264864
0.0307286	-0.182453	1	Surf4	E18_vs_PP	CA1	0.26645
0.030892	-0.0241558	1	Ppp2r5a	E18_vs_PP	CA1	0.267473
0.0310018	0.0253486	1	Rad17	E18_vs_PP	CA1	0.268028
0.0311374	-0.170505	1	Tor1aip2	E18_vs_PP	CA1	0.268806
0.0312727	-0.133331	1	Cacna1d	E18_vs_PP	CA1	0.269578
0.0314673	0.0569646	1	Kpna3	E18_vs_PP	CA1	0.270576
0.0314905	-0.133466	1	Actl6a	E18_vs_PP	CA1	0.270576
0.0315266	0.096932	1	Sec62	E18_vs_PP	CA1	0.270576
0.0316509	-0.123676	1	Pten	E18_vs_PP	CA1	0.271185
0.0317173	0.214617	1	Rhoa	E18_vs_PP	CA1	0.271185
0.031789	0.134734	1	Ndufa3	E18_vs_PP	CA1	0.271185
0.0318047	-0.0811436	1	Akap5	E18_vs_PP	CA1	0.271185
0.0318282	-0.15769	1	Dcx	E18_vs_PP	CA1	0.271185
0.0319209	-0.125817	1	Stt3b	E18_vs_PP	CA1	0.271581
0.0320199	0.097012	1	Kcnh7	E18_vs_PP	CA1	0.271626
0.0320343	0.0687632	1	Brsk2	E18_vs_PP	CA1	0.271626
0.0320727	0.221062	1	Eml2	E18_vs_PP	CA1	0.271626
0.0321109	0.088584	1	Cbx6	E18_vs_PP	CA1	0.271626
0.0322387	-0.0702347	1	Xist	E18_vs_PP	CA1	0.271935
0.0322399	-0.139145	1	Spcs3	E18_vs_PP	CA1	0.271935
0.0323258	0.132165	1	Dnal4	E18_vs_PP	CA1	0.272269
0.0325655	-0.126374	1	Il1rn	E18_vs_PP	CA1	0.273854
0.0326072	-0.140134	1	Gipc2	E18_vs_PP	CA1	0.273854
0.0328991	-0.195774	1	Yeats2	E18_vs_PP	CA1	0.275837
0.0329372	-0.163635	1	Traip	E18_vs_PP	CA1	0.275837
0.0330781	-0.0494102	1	Nyap2	E18_vs_PP	CA1	0.276623
0.0332546	0.108001	1	B3gat1	E18_vs_PP	CA1	0.277178
0.0332812	0.153909	1	Pitpnc1	E18_vs_PP	CA1	0.277178
0.0332859	-0.181001	1	Brd4	E18_vs_PP	CA1	0.277178
0.033392	0.133263	1	Fgf12	E18_vs_PP	CA1	0.277292
0.0333984	0.165718	1	Tubb4a	E18_vs_PP	CA1	0.277292
0.0334411	-0.0653016	1	Atp6ap2	E18_vs_PP	CA1	0.277292
0.0335658	-0.15899	1	A430073D23Rik	E18_vs_PP	CA1	0.277713
0.0336215	0.180003	1	B4galt6	E18_vs_PP	CA1	0.277713
0.0336336	-0.0284603	1	Pla2g12a	E18_vs_PP	CA1	0.277713
0.0337669	-0.146252	1	Hdac1	E18_vs_PP	CA1	0.278416
0.0338134	-0.149405	1	Ap5z1	E18_vs_PP	CA1	0.278416
0.0338718	0.0804076	1	Naa50	E18_vs_PP	CA1	0.278507
0.0341739	-0.117638	1	Lmln	E18_vs_PP	CA1	0.280407
0.0341983	0.150538	1	Kcnip4	E18_vs_PP	CA1	0.280407
0.0342494	0.127162	1	1700019D03Rik	E18_vs_PP	CA1	0.280435
0.0345349	-0.1511	1	Tbc1d24	E18_vs_PP	CA1	0.282379
0.0347716	-0.0937245	1	Prnp	E18_vs_PP	CA1	0.28392
0.0348312	-0.149692	1	Rnft1	E18_vs_PP	CA1	0.284012
0.0349621	0.123466	1	Pgk1	E18_vs_PP	CA1	0.284203
0.0349876	-0.127611	1	Alkbh1	E18_vs_PP	CA1	0.284203
0.0349996	-0.184951	1	Rictor	E18_vs_PP	CA1	0.284203
0.03517	0.127978	1	C1ql3	E18_vs_PP	CA1	0.285192
0.035222	0.0343394	1	Tcirg1	E18_vs_PP	CA1	0.285221
0.0353515	0.0347758	1	Morf4l1	E18_vs_PP	CA1	0.285334
0.0354082	-0.142667	1	Dync1i2	E18_vs_PP	CA1	0.285334
0.0354176	0.0244068	1	Srp14	E18_vs_PP	CA1	0.285334
0.0354301	0.0909178	1	Vamp2	E18_vs_PP	CA1	0.285334
0.0355011	-0.130113	1	Nfxl1	E18_vs_PP	CA1	0.285514
0.0358355	-0.119439	1	2810403A07Rik	E18_vs_PP	CA1	0.28781
0.0359404	-0.138213	1	Trim9	E18_vs_PP	CA1	0.288058
0.0359733	-0.146056	1	Tmtc3	E18_vs_PP	CA1	0.288058
0.0360768	-0.189071	1	Zmym4	E18_vs_PP	CA1	0.288058
0.0361031	0.0999442	1	Rpl32	E18_vs_PP	CA1	0.288058
0.0361114	-0.16706	1	Dnajc1	E18_vs_PP	CA1	0.288058
0.036185	0.186843	1	Gng3	E18_vs_PP	CA1	0.288254
0.0366905	-0.0589238	1	Kcnj2	E18_vs_PP	CA1	0.291361
0.0367231	0.0998331	1	Cenpb	E18_vs_PP	CA1	0.291361
0.0367236	-0.173201	1	1810026B05Rik	E18_vs_PP	CA1	0.291361
0.0368046	0.162324	1	Fbxo3	E18_vs_PP	CA1	0.29161
0.0368604	0.0816556	1	Id2	E18_vs_PP	CA1	0.291659
0.036925	0.142089	1	Rps5	E18_vs_PP	CA1	0.291777
0.0370368	-0.0172086	1	Hmgcr	E18_vs_PP	CA1	0.292268
0.0371956	-0.0745763	1	Plppr2	E18_vs_PP	CA1	0.292888
0.037215	-0.133179	1	Hmbox1	E18_vs_PP	CA1	0.292888
0.0373228	-0.177193	1	Gm4631	E18_vs_PP	CA1	0.293344
0.0374362	-0.0783377	1	A330032B11Rik	E18_vs_PP	CA1	0.293557
0.0374498	0.104501	1	Sepw1	E18_vs_PP	CA1	0.293557
0.0376299	0.148696	1	Gabra3	E18_vs_PP	CA1	0.294576
0.0377172	-0.0641608	1	Cpa6	E18_vs_PP	CA1	0.294867
0.0380465	-0.0152887	1	Gm21897	E18_vs_PP	CA1	0.296812
0.0380671	-0.103884	1	C2cd3	E18_vs_PP	CA1	0.296812
0.0382971	0.0844551	1	Ap2m1	E18_vs_PP	CA1	0.29821
0.0384519	-0.0804447	1	Grk6	E18_vs_PP	CA1	0.29902
0.0385133	-0.119406	1	Chrm1	E18_vs_PP	CA1	0.299101
0.0386838	0.0773528	1	Tusc3	E18_vs_PP	CA1	0.300029
0.0389468	-0.146808	1	Gbf1	E18_vs_PP	CA1	0.301671
0.0390566	0.127623	1	Chst2	E18_vs_PP	CA1	0.302124
0.0393122	-0.113046	1	Gm26737	E18_vs_PP	CA1	0.303429
0.0393728	0.111023	1	Ndrg4	E18_vs_PP	CA1	0.303429
0.0393803	-0.122842	1	Jmjd1c	E18_vs_PP	CA1	0.303429
0.0394581	0.0718696	1	Dnajb14	E18_vs_PP	CA1	0.303631
0.0395859	0.07084	1	Polr2k	E18_vs_PP	CA1	0.304216
0.0398314	0.0836927	1	Fbxw7	E18_vs_PP	CA1	0.305703
0.0400195	0.0287008	1	Sgms1	E18_vs_PP	CA1	0.306746
0.0401763	0.137653	1	Rab10	E18_vs_PP	CA1	0.307547
0.0403061	0.0953785	1	Ccdc86	E18_vs_PP	CA1	0.307954
0.0403342	-0.159942	1	Fermt2	E18_vs_PP	CA1	0.307954
0.04044	0.199941	1	Arhgdig	E18_vs_PP	CA1	0.308326
0.0404878	-0.137882	1	Sez6l	E18_vs_PP	CA1	0.308326
0.0408562	-0.118947	1	Hectd3	E18_vs_PP	CA1	0.310239
0.0408641	0.15976	1	Ubc	E18_vs_PP	CA1	0.310239
0.0408972	0.141514	1	Aco2	E18_vs_PP	CA1	0.310239
0.041547	-0.0269244	1	Anapc4	E18_vs_PP	CA1	0.314762
0.0420778	-0.0940717	1	Rslcan18	E18_vs_PP	CA1	0.317938
0.0421453	-0.15927	1	Pak3	E18_vs_PP	CA1	0.317938
0.0422008	-0.159148	1	Usp16	E18_vs_PP	CA1	0.317938
0.0422243	-0.0803208	1	Nsun7	E18_vs_PP	CA1	0.317938
0.0422637	-0.120834	1	2410004P03Rik	E18_vs_PP	CA1	0.317938
0.0422908	0.129528	1	Ppp1cb	E18_vs_PP	CA1	0.317938
0.0423474	0.0969861	1	Prkcb	E18_vs_PP	CA1	0.317957
0.0424418	-0.152005	1	Arhgef7	E18_vs_PP	CA1	0.318049
0.0424679	-0.0960072	1	Snx3	E18_vs_PP	CA1	0.318049
0.0428669	0.0602485	1	Rab34	E18_vs_PP	CA1	0.320486
0.0429023	0.105778	1	Slamf1	E18_vs_PP	CA1	0.320486
0.042981	0.111744	1	Gstm5	E18_vs_PP	CA1	0.320667
0.0431876	0.101379	1	Anp32e	E18_vs_PP	CA1	0.321541
0.0432571	0.185733	1	Vstm2a	E18_vs_PP	CA1	0.321541
0.0432763	-0.161356	1	Ralbp1	E18_vs_PP	CA1	0.321541
0.043317	0.0511861	1	Ogfod1	E18_vs_PP	CA1	0.321541
0.0434428	-0.000950861	1	Map4	E18_vs_PP	CA1	0.322068
0.0436583	0.0522097	1	Phyhip	E18_vs_PP	CA1	0.323258
0.0438826	0.116308	1	Hgsnat	E18_vs_PP	CA1	0.323525
0.0439587	-0.201698	1	Taf2	E18_vs_PP	CA1	0.323525
0.0439835	0.16227	1	Tnfaip1	E18_vs_PP	CA1	0.323525
0.044008	0.13097	1	Lrrc2	E18_vs_PP	CA1	0.323525
0.0440408	-0.148601	1	AI838599	E18_vs_PP	CA1	0.323525
0.044066	0.180202	1	Ndufb9	E18_vs_PP	CA1	0.323525
0.0441892	-0.139677	1	Erdr1	E18_vs_PP	CA1	0.323525
0.0442228	0.149166	1	Gng2	E18_vs_PP	CA1	0.323525
0.0442345	0.0815344	1	Gfra4	E18_vs_PP	CA1	0.323525
0.0442446	-0.113558	1	Mmp12	E18_vs_PP	CA1	0.323525
0.0443273	-0.14225	1	Ryr2	E18_vs_PP	CA1	0.323727
0.044387	-0.176982	1	N4bp2l2	E18_vs_PP	CA1	0.323761
0.04454	-0.114723	1	Ccdc71l	E18_vs_PP	CA1	0.324474
0.044651	0.0913806	1	Atg2b	E18_vs_PP	CA1	0.324534
0.0446667	-0.117503	1	Fam133b	E18_vs_PP	CA1	0.324534
0.0447138	-0.175929	1	Sipa1l3	E18_vs_PP	CA1	0.324534
0.0449248	-0.171482	1	Mapkbp1	E18_vs_PP	CA1	0.32552
0.0450585	0.0584983	1	Gm10636	E18_vs_PP	CA1	0.32552
0.045108	0.036876	1	Setd3	E18_vs_PP	CA1	0.32552
0.0452038	-0.160556	1	D1Ertd622e	E18_vs_PP	CA1	0.32552
0.0452406	-0.0814462	1	Tcaf1	E18_vs_PP	CA1	0.32552
0.0452609	-0.105755	1	March7	E18_vs_PP	CA1	0.32552
0.0452881	0.145957	1	Ppp1r7	E18_vs_PP	CA1	0.32552
0.0452926	0.137367	1	Fam49a	E18_vs_PP	CA1	0.32552
0.0455817	-0.138037	1	Ccpg1os	E18_vs_PP	CA1	0.327147
0.0456303	-0.165408	1	Lrrc40	E18_vs_PP	CA1	0.327147
0.0457377	0.148787	1	Ndufa2	E18_vs_PP	CA1	0.327204
0.0457496	-0.0968373	1	Fgd4	E18_vs_PP	CA1	0.327204
0.0458721	-0.159783	1	Naa15	E18_vs_PP	CA1	0.32745
0.0458953	0.186066	1	Bag1	E18_vs_PP	CA1	0.32745
0.0459908	0.129318	1	Ppp2r2b	E18_vs_PP	CA1	0.327559
0.0460221	-0.134086	1	Gm38393	E18_vs_PP	CA1	0.327559
0.046142	-0.0624457	1	Zcchc9	E18_vs_PP	CA1	0.328015
0.0463056	0.0981283	1	Hey1	E18_vs_PP	CA1	0.328614
0.0464546	-0.108092	1	Spns2	E18_vs_PP	CA1	0.328614
0.0464796	-0.120738	1	Ormdl3	E18_vs_PP	CA1	0.328614
0.046549	0.195009	1	Edil3	E18_vs_PP	CA1	0.328614
0.0466713	-0.0640829	1	Unc5d	E18_vs_PP	CA1	0.328614
0.046724	-0.195757	1	Per2	E18_vs_PP	CA1	0.328614
0.0467657	-0.134675	1	Ap1s3	E18_vs_PP	CA1	0.328614
0.0467801	0.146192	1	Dusp6	E18_vs_PP	CA1	0.328614
0.0468175	-0.0639122	1	Arhgef4	E18_vs_PP	CA1	0.328614
0.0468362	-0.046699	1	Tomm5	E18_vs_PP	CA1	0.328614
0.0468508	-0.173741	1	Fos	E18_vs_PP	CA1	0.328614
0.0471411	0.0154526	1	Pank3	E18_vs_PP	CA1	0.328614
0.0471462	0.113833	1	Guk1	E18_vs_PP	CA1	0.328614
0.0471592	-0.140184	1	Smek1	E18_vs_PP	CA1	0.328614
0.0472455	0.145906	1	Atp6v0d1	E18_vs_PP	CA1	0.328614
0.0472622	0.155368	1	Dgkz	E18_vs_PP	CA1	0.328614
0.0472843	0.160741	1	Marcksl1	E18_vs_PP	CA1	0.328614
0.0472902	-0.145157	1	Acsl4	E18_vs_PP	CA1	0.328614
0.0473237	-0.134781	1	A330017A19Rik	E18_vs_PP	CA1	0.328614
0.0473703	-0.0994209	1	Cnrip1	E18_vs_PP	CA1	0.328614
0.047444	-0.0896282	1	Tardbp	E18_vs_PP	CA1	0.328614
0.0474558	-0.0587984	1	Exoc4	E18_vs_PP	CA1	0.328614
0.0476912	-0.0876054	1	Itch	E18_vs_PP	CA1	0.329346
0.0477087	-0.143508	1	Cpsf6	E18_vs_PP	CA1	0.329346
0.0477297	-0.0906382	1	Mrpl3	E18_vs_PP	CA1	0.329346
0.0478883	-0.0681577	1	Foxred1	E18_vs_PP	CA1	0.330053
0.0480243	0.101382	1	Ndufb2	E18_vs_PP	CA1	0.330603
0.048212	-0.141763	1	Srsf6	E18_vs_PP	CA1	0.331088
0.0482276	0.150742	1	Zc2hc1a	E18_vs_PP	CA1	0.331088
0.0483091	0.0511686	1	Srsf4	E18_vs_PP	CA1	0.331088
0.04832	0.161126	1	Tmsb10	E18_vs_PP	CA1	0.331088
0.0484345	-0.109919	1	Arnt	E18_vs_PP	CA1	0.331279
0.0485152	-0.161049	1	Nmt2	E18_vs_PP	CA1	0.331279
0.0485169	-0.154716	1	Rab11fip3	E18_vs_PP	CA1	0.331279
0.0486297	-0.140978	1	Dlx6	E18_vs_PP	CA1	0.33164
0.0486826	-0.084276	1	Dock4	E18_vs_PP	CA1	0.33164
0.048846	-0.143445	1	Grik2	E18_vs_PP	CA1	0.332356
0.0489008	-0.121801	1	Ahctf1	E18_vs_PP	CA1	0.332356
0.0490929	0.0485325	1	Ctsa	E18_vs_PP	CA1	0.332376
0.0491576	-0.111351	1	Phip	E18_vs_PP	CA1	0.332376
0.0492211	-0.125294	1	Ildr2	E18_vs_PP	CA1	0.332376
0.0492226	-0.14398	1	Ikzf4	E18_vs_PP	CA1	0.332376
0.0492688	-0.145036	1	Hacd1	E18_vs_PP	CA1	0.332376
0.0492993	-0.137941	1	Zfp715	E18_vs_PP	CA1	0.332376
0.0493461	-0.0923229	1	Syt7	E18_vs_PP	CA1	0.332376
0.0493764	-0.146733	1	Nxf1	E18_vs_PP	CA1	0.332376
0.0494263	0.0883316	1	Slc2a3	E18_vs_PP	CA1	0.332376
0.0494691	-0.134512	1	Car12	E18_vs_PP	CA1	0.332376
0.0497926	-0.13253	1	Gm5464	E18_vs_PP	CA1	0.334167
0.0499306	-0.135994	1	Rreb1	E18_vs_PP	CA1	0.334333
0.0499396	-0.0895047	1	Efnb2	E18_vs_PP	CA1	0.334333
0.0499976	0.135404	1	Vps37d	E18_vs_PP	CA1	0.334333
0.0500669	-0.108502	1	Sptbn1	E18_vs_PP	CA1	0.334333
0.0501668	-0.162439	1	Fryl	E18_vs_PP	CA1	0.334333
0.0501719	0.115364	1	Actr3	E18_vs_PP	CA1	0.334333
0.0502154	-0.132709	1	Samd8	E18_vs_PP	CA1	0.334333
0.0503092	-0.0955881	1	Dnajc3	E18_vs_PP	CA1	0.334537
0.0504469	-0.139313	1	Hadha	E18_vs_PP	CA1	0.334537
0.0505421	-0.0365327	1	Psme4	E18_vs_PP	CA1	0.334537
0.0505872	0.0430009	1	Hspa13	E18_vs_PP	CA1	0.334537
0.0505944	0.0577226	1	Pgbd5	E18_vs_PP	CA1	0.334537
0.0506109	0.172127	1	Ndufa6	E18_vs_PP	CA1	0.334537
0.0506443	0.109395	1	Nrk	E18_vs_PP	CA1	0.334537
0.0511675	0.183669	1	Pik3r1	E18_vs_PP	CA1	0.337614
0.0514437	0.160801	1	Aldoc	E18_vs_PP	CA1	0.339056
0.0515744	-0.0336687	1	Gpr180	E18_vs_PP	CA1	0.339536
0.051638	-0.0829112	1	Rltpr	E18_vs_PP	CA1	0.339575
0.0517578	-0.0376343	1	Emc3	E18_vs_PP	CA1	0.339983
0.0518769	-0.138623	1	Akap8	E18_vs_PP	CA1	0.340384
0.0520073	-0.151735	1	Srsf3	E18_vs_PP	CA1	0.34086
0.0522086	0.131811	1	Atp5g2	E18_vs_PP	CA1	0.341254
0.0522187	-0.104693	1	Itpr1	E18_vs_PP	CA1	0.341254
0.0522417	-0.105707	1	Rab14	E18_vs_PP	CA1	0.341254
0.0523598	-0.112974	1	Bhmt2	E18_vs_PP	CA1	0.34131
0.0523941	0.176702	1	Gprc5b	E18_vs_PP	CA1	0.34131
0.052441	-0.188293	1	Onecut2	E18_vs_PP	CA1	0.34131
0.0525786	-0.122542	1	Pisd	E18_vs_PP	CA1	0.34131
0.0525925	0.173568	1	Mat2b	E18_vs_PP	CA1	0.34131
0.0526218	-0.116474	1	Hdlbp	E18_vs_PP	CA1	0.34131
0.0526614	0.0932941	1	Rpl36a	E18_vs_PP	CA1	0.34131
0.0527584	-0.136591	1	Aig1	E18_vs_PP	CA1	0.34131
0.0527735	-0.123627	1	Fam189b	E18_vs_PP	CA1	0.34131
0.0528449	-0.171879	1	Ralgps2	E18_vs_PP	CA1	0.34131
0.0529191	-0.109559	1	Hsbp1	E18_vs_PP	CA1	0.34131
0.0529708	0.0530835	1	Purb	E18_vs_PP	CA1	0.34131
0.0530222	0.1519	1	Pdgfa	E18_vs_PP	CA1	0.34131
0.0530629	-0.116947	1	Faf1	E18_vs_PP	CA1	0.34131
0.0532318	-0.146292	1	Slc9a2	E18_vs_PP	CA1	0.341793
0.0532555	-0.109	1	Creb1	E18_vs_PP	CA1	0.341793
0.0533703	-0.10053	1	Mpp5	E18_vs_PP	CA1	0.341793
0.0534155	-0.120493	1	Epc2	E18_vs_PP	CA1	0.341793
0.0534468	-0.11103	1	Dennd5b	E18_vs_PP	CA1	0.341793
0.053526	0.128968	1	Ggct	E18_vs_PP	CA1	0.341793
0.0535942	0.187957	1	Lrig2	E18_vs_PP	CA1	0.341793
0.0536032	-0.0489585	1	Plpp3	E18_vs_PP	CA1	0.341793
0.0538754	-0.131675	1	Hpcal4	E18_vs_PP	CA1	0.343015
0.0539668	-0.0657352	1	Nol3	E18_vs_PP	CA1	0.343015
0.0539698	-0.0813044	1	Pkib	E18_vs_PP	CA1	0.343015
0.054203	-0.135593	1	Ago2	E18_vs_PP	CA1	0.343717
0.054288	-0.115111	1	Ptprs	E18_vs_PP	CA1	0.343717
0.0543752	0.0200648	1	Kif1bp	E18_vs_PP	CA1	0.343717
0.0543777	0.0735779	1	Snhg6	E18_vs_PP	CA1	0.343717
0.0543865	0.14662	1	Psmb4	E18_vs_PP	CA1	0.343717
0.0544311	0.00451421	1	Gm26774	E18_vs_PP	CA1	0.343717
0.0545809	-0.140724	1	Usp36	E18_vs_PP	CA1	0.344293
0.0546918	0.0962685	1	Fjx1	E18_vs_PP	CA1	0.344485
0.0547285	-0.126295	1	Nlgn1	E18_vs_PP	CA1	0.344485
0.0547969	0.182481	1	Sst	E18_vs_PP	CA1	0.344547
0.0548966	0.0416851	1	Gm26615	E18_vs_PP	CA1	0.344755
0.0549821	-0.173664	1	Igf1r	E18_vs_PP	CA1	0.344755
0.0550059	-0.112824	1	Slain1	E18_vs_PP	CA1	0.344755
0.0551219	-0.156791	1	Mbtd1	E18_vs_PP	CA1	0.345114
0.0552232	-0.0107085	1	Dnajb9	E18_vs_PP	CA1	0.345364
0.0552794	0.0940227	1	Cnot3	E18_vs_PP	CA1	0.345364
0.0555061	0.135191	1	Rpl7	E18_vs_PP	CA1	0.346412
0.0556465	-0.0483065	1	Snx21	E18_vs_PP	CA1	0.346624
0.055658	-0.116013	1	Zfp952	E18_vs_PP	CA1	0.346624
0.0558022	-0.144874	1	Alcam	E18_vs_PP	CA1	0.347154
0.0561101	-0.0428591	1	Fam105a	E18_vs_PP	CA1	0.348671
0.0561646	-0.123805	1	Snapc3	E18_vs_PP	CA1	0.348671
0.0563851	0.113531	1	Tceal6	E18_vs_PP	CA1	0.349589
0.0564816	-0.15681	1	Actr1b	E18_vs_PP	CA1	0.349589
0.0564908	0.126103	1	Atp5a1	E18_vs_PP	CA1	0.349589
0.0567757	-0.146251	1	Rsu1	E18_vs_PP	CA1	0.350676
0.0567891	0.148601	1	Hnrnpa3	E18_vs_PP	CA1	0.350676
0.0568455	-0.0755686	1	Med23	E18_vs_PP	CA1	0.350676
0.0569666	0.109529	1	Ppm1e	E18_vs_PP	CA1	0.351055
0.0571596	0.108984	1	Tsc22d4	E18_vs_PP	CA1	0.351792
0.0572147	-0.0660798	1	Inpp1	E18_vs_PP	CA1	0.351792
0.0573318	-0.132408	1	Kdm7a	E18_vs_PP	CA1	0.351792
0.0573655	0.122959	1	Fbxo22	E18_vs_PP	CA1	0.351792
0.0574567	0.125791	1	Rpl21	E18_vs_PP	CA1	0.351792
0.0575196	-0.0399559	1	Metap1	E18_vs_PP	CA1	0.351792
0.057561	0.142857	1	Rpsa	E18_vs_PP	CA1	0.351792
0.0575649	-0.171281	1	Fam214a	E18_vs_PP	CA1	0.351792
0.0577442	-0.0344798	1	Lrrc41	E18_vs_PP	CA1	0.352522
0.0578944	0.111735	1	Rab33b	E18_vs_PP	CA1	0.353072
0.057957	0.12149	1	Zxdb	E18_vs_PP	CA1	0.353087
0.0587969	-0.158584	1	Rab28	E18_vs_PP	CA1	0.357833
0.0590318	0.186353	1	Ogdh	E18_vs_PP	CA1	0.358041
0.0590861	-0.122327	1	Esf1	E18_vs_PP	CA1	0.358041
0.059137	0.105765	1	Agap3	E18_vs_PP	CA1	0.358041
0.0591936	-0.135108	1	Specc1l	E18_vs_PP	CA1	0.358041
0.0591954	-0.078411	1	Zdhhc21	E18_vs_PP	CA1	0.358041
0.0592301	0.108074	1	Pgam1	E18_vs_PP	CA1	0.358041
0.0592682	-0.160642	1	Gm14296	E18_vs_PP	CA1	0.358041
0.0593356	-0.0954482	1	Hnrnpm	E18_vs_PP	CA1	0.358041
0.0593792	0.0926752	1	Kcnq3	E18_vs_PP	CA1	0.358041
0.0595248	0.128418	1	Eif3k	E18_vs_PP	CA1	0.358551
0.0596599	-0.00819406	1	Fras1	E18_vs_PP	CA1	0.358998
0.0598785	0.138562	1	Cct3	E18_vs_PP	CA1	0.359232
0.0600442	-0.0828695	1	Ctf2	E18_vs_PP	CA1	0.359232
0.0600615	0.0725985	1	Mrpl53	E18_vs_PP	CA1	0.359232
0.0600888	-0.0913963	1	Atp6v1g2	E18_vs_PP	CA1	0.359232
0.0601298	0.148912	1	Stmn2	E18_vs_PP	CA1	0.359232
0.0601319	0.0979827	1	Psma7	E18_vs_PP	CA1	0.359232
0.0602025	0.148176	1	Kcnd2	E18_vs_PP	CA1	0.359232
0.0602304	0.156974	1	Ust	E18_vs_PP	CA1	0.359232
0.0602488	-0.0778557	1	Scyl2	E18_vs_PP	CA1	0.359232
0.060847	0.0296418	1	Bri3	E18_vs_PP	CA1	0.362092
0.0608516	-0.0935732	1	Idi1	E18_vs_PP	CA1	0.362092
0.0610523	0.17792	1	Cap2	E18_vs_PP	CA1	0.362575
0.0611088	-0.118146	1	Pde11a	E18_vs_PP	CA1	0.362575
0.0611178	0.136995	1	St6galnac6	E18_vs_PP	CA1	0.362575
0.0611843	0.150725	1	Bag5	E18_vs_PP	CA1	0.362603
0.0612789	-0.154224	1	Pik3c2a	E18_vs_PP	CA1	0.362798
0.0621	-0.0551713	1	Sag	E18_vs_PP	CA1	0.36729
0.0626638	-0.00385496	1	Mcts1	E18_vs_PP	CA1	0.369701
0.0626835	0.044999	1	Gdpd1	E18_vs_PP	CA1	0.369701
0.0626963	-0.163449	1	Ptbp3	E18_vs_PP	CA1	0.369701
0.0627634	0.0879739	1	Mon2	E18_vs_PP	CA1	0.369725
0.063046	0.137806	1	Plxna2	E18_vs_PP	CA1	0.370952
0.0630977	-0.131142	1	Zcchc6	E18_vs_PP	CA1	0.370952
0.0634181	0.14563	1	Tuba1a	E18_vs_PP	CA1	0.372275
0.0634495	-0.119529	1	Slc4a7	E18_vs_PP	CA1	0.372275
0.0637855	-0.109971	1	Pwwp2a	E18_vs_PP	CA1	0.373588
0.0638003	-0.123896	1	Mmd2	E18_vs_PP	CA1	0.373588
0.0639001	0.0284829	1	Tmem200a	E18_vs_PP	CA1	0.373603
0.06393	0.164434	1	Cdk5r2	E18_vs_PP	CA1	0.373603
0.0642558	0.138522	1	Psmd13	E18_vs_PP	CA1	0.375134
0.0643241	-0.111696	1	Grm1	E18_vs_PP	CA1	0.37516
0.0643909	0.14916	1	Cst3	E18_vs_PP	CA1	0.375178
0.0645318	-0.135602	1	Nol4l	E18_vs_PP	CA1	0.375626
0.0646966	-0.148007	1	Tmeff2	E18_vs_PP	CA1	0.376213
0.0647866	0.144652	1	Grina	E18_vs_PP	CA1	0.376364
0.0651462	-0.0563629	1	Rnf138	E18_vs_PP	CA1	0.377812
0.0652271	-0.136906	1	Ccnl1	E18_vs_PP	CA1	0.377812
0.0652287	-0.0887679	1	Mat2a	E18_vs_PP	CA1	0.377812
0.0653959	-0.0686246	1	Prpf38a	E18_vs_PP	CA1	0.378408
0.0654956	0.102907	1	Gipc1	E18_vs_PP	CA1	0.378612
0.0656784	0.125718	1	Krt222	E18_vs_PP	CA1	0.379108
0.0657103	-0.136844	1	Ap3s1	E18_vs_PP	CA1	0.379108
0.0658227	-0.180901	1	Atp1b3	E18_vs_PP	CA1	0.379384
0.0660043	-0.138184	1	Slc3a2	E18_vs_PP	CA1	0.379753
0.066016	-0.107119	1	Wfs1	E18_vs_PP	CA1	0.379753
0.0661332	0.0987238	1	Uba1	E18_vs_PP	CA1	0.380056
0.0662909	0.189301	1	Ndst1	E18_vs_PP	CA1	0.38059
0.0665386	-0.0617709	1	Gprasp1	E18_vs_PP	CA1	0.381442
0.0666002	0.126754	1	R3hdm2	E18_vs_PP	CA1	0.381442
0.066634	-0.137444	1	Rnmt	E18_vs_PP	CA1	0.381442
0.0667044	0.247726	1	Trak1	E18_vs_PP	CA1	0.381474
0.0668154	0.0891117	1	Lztr1	E18_vs_PP	CA1	0.381738
0.0670962	-0.159976	1	Zdhhc20	E18_vs_PP	CA1	0.382852
0.0671746	-0.0831876	1	Arcn1	E18_vs_PP	CA1	0.382852
0.0672059	-0.159205	1	Tmed10	E18_vs_PP	CA1	0.382852
0.0674284	-0.104002	1	1700037H04Rik	E18_vs_PP	CA1	0.383381
0.0674291	-0.0328439	1	Slitrk2	E18_vs_PP	CA1	0.383381
0.0677617	-0.109721	1	Rc3h2	E18_vs_PP	CA1	0.384899
0.06808	-0.109897	1	Gm15013	E18_vs_PP	CA1	0.386239
0.0681289	0.126589	1	Kcnc4	E18_vs_PP	CA1	0.386239
0.0682344	-0.138353	1	4833439L19Rik	E18_vs_PP	CA1	0.386464
0.0683246	0.109229	1	Cnp	E18_vs_PP	CA1	0.386603
0.0685063	0.127283	1	Brinp1	E18_vs_PP	CA1	0.387009
0.0685281	0.0141407	1	Hras	E18_vs_PP	CA1	0.387009
0.0686917	-0.155838	1	C920009B18Rik	E18_vs_PP	CA1	0.387545
0.0687547	-0.0895423	1	Prdm15	E18_vs_PP	CA1	0.387545
0.0689892	-0.126018	1	Hnrnpul1	E18_vs_PP	CA1	0.388041
0.068998	0.0770469	1	Plppr4	E18_vs_PP	CA1	0.388041
0.0690408	0.0807979	1	Dbn1	E18_vs_PP	CA1	0.388041
0.0691316	0.197589	1	Tmem56	E18_vs_PP	CA1	0.38818
0.0692303	-0.139445	1	Pdlim7	E18_vs_PP	CA1	0.388352
0.0692944	-0.0981071	1	Ahi1	E18_vs_PP	CA1	0.388352
0.0695376	0.011501	1	Rsl24d1	E18_vs_PP	CA1	0.388999
0.0695421	0.0121905	1	Sccpdh	E18_vs_PP	CA1	0.388999
0.0697057	-0.166248	1	Dctn6	E18_vs_PP	CA1	0.389544
0.0699787	0.0681985	1	Pcdh10	E18_vs_PP	CA1	0.390063
0.0699982	-0.098481	1	D130043K22Rik	E18_vs_PP	CA1	0.390063
0.0700108	0.129561	1	Rpl37	E18_vs_PP	CA1	0.390063
0.070064	0.00684941	1	Cops7a	E18_vs_PP	CA1	0.390063
0.0705706	-0.148394	1	Khdrbs3	E18_vs_PP	CA1	0.392512
0.0708387	0.0969342	1	Gpd2	E18_vs_PP	CA1	0.39363
0.0712635	0.0573413	1	Ndufa7	E18_vs_PP	CA1	0.395617
0.0713908	-0.163524	1	Hectd2	E18_vs_PP	CA1	0.395949
0.0715593	-0.143144	1	Dync2h1	E18_vs_PP	CA1	0.396309
0.0716017	-0.107418	1	Fgfr1op2	E18_vs_PP	CA1	0.396309
0.0716578	-0.143172	1	Osgin2	E18_vs_PP	CA1	0.396309
0.071783	0.0655278	1	Tm9sf3	E18_vs_PP	CA1	0.396628
0.0719465	0.12833	1	Asap2	E18_vs_PP	CA1	0.397158
0.0723244	0.119289	1	Ap2a1	E18_vs_PP	CA1	0.398064
0.0723467	-0.150354	1	Scaf8	E18_vs_PP	CA1	0.398064
0.0723941	0.0798125	1	Dynll1	E18_vs_PP	CA1	0.398064
0.0724024	-0.169326	1	C130071C03Rik	E18_vs_PP	CA1	0.398064
0.0724491	-0.065463	1	Pnisr	E18_vs_PP	CA1	0.398064
0.0725622	-0.105959	1	Gabbr2	E18_vs_PP	CA1	0.398313
0.0726792	-0.105295	1	Ankrd17	E18_vs_PP	CA1	0.398583
0.0729393	-0.0939333	1	App	E18_vs_PP	CA1	0.399087
0.0729531	-0.129043	1	Chfr	E18_vs_PP	CA1	0.399087
0.0729747	-0.0840863	1	Exoc6b	E18_vs_PP	CA1	0.399087
0.0733306	-0.100422	1	Lifr	E18_vs_PP	CA1	0.400631
0.0735061	0.103628	1	Gnao1	E18_vs_PP	CA1	0.400631
0.0735566	-0.119619	1	Apaf1	E18_vs_PP	CA1	0.400631
0.0735592	0.105064	1	Rin1	E18_vs_PP	CA1	0.400631
0.0735978	-0.0394589	1	Dtnbos	E18_vs_PP	CA1	0.400631
0.0741157	-0.0844644	1	Gpatch2	E18_vs_PP	CA1	0.403006
0.0741712	-0.133593	1	Syt5	E18_vs_PP	CA1	0.403006
0.0744563	0.118703	1	Actr3b	E18_vs_PP	CA1	0.404033
0.0745363	-0.142445	1	Rcor1	E18_vs_PP	CA1	0.404033
0.0745665	0.0982823	1	Fam69b	E18_vs_PP	CA1	0.404033
0.0746948	0.135261	1	Ptpmt1	E18_vs_PP	CA1	0.404111
0.0747809	0.123588	1	Cit	E18_vs_PP	CA1	0.404111
0.0747871	-0.0838637	1	Zzz3	E18_vs_PP	CA1	0.404111
0.0749518	0.115186	1	Kcnc3	E18_vs_PP	CA1	0.404629
0.0752587	-0.0111206	1	Crlf3	E18_vs_PP	CA1	0.405914
0.0755238	0.165644	1	AK010878	E18_vs_PP	CA1	0.406873
0.075575	-0.104666	1	Golga5	E18_vs_PP	CA1	0.406873
0.0758057	-0.0473864	1	Plxnc1	E18_vs_PP	CA1	0.407742
0.0761056	0.0931717	1	Asic2	E18_vs_PP	CA1	0.408981
0.0763053	0.119094	1	Shisa5	E18_vs_PP	CA1	0.409679
0.0764566	-0.106954	1	Ykt6	E18_vs_PP	CA1	0.409745
0.0764734	-0.142502	1	Ccdc93	E18_vs_PP	CA1	0.409745
0.0765267	-0.166708	1	Junb	E18_vs_PP	CA1	0.409745
0.0767725	-0.0652179	1	Colec12	E18_vs_PP	CA1	0.41039
0.0768403	-0.1096	1	Gramd1b	E18_vs_PP	CA1	0.41039
0.0768564	-0.0326103	1	Tmco1	E18_vs_PP	CA1	0.41039
0.0771704	-0.00917936	1	Cul1	E18_vs_PP	CA1	0.411692
0.0772724	-0.014363	1	Cds2	E18_vs_PP	CA1	0.411863
0.0775119	0.0888579	1	Rpl11	E18_vs_PP	CA1	0.41257
0.0775454	-0.0759088	1	Ttc3	E18_vs_PP	CA1	0.41257
0.0776673	-0.0995902	1	Gtf2i	E18_vs_PP	CA1	0.412626
0.0776963	-0.133706	1	Fam120a	E18_vs_PP	CA1	0.412626
0.0779256	0.16195	1	Tlk1	E18_vs_PP	CA1	0.413371
0.0779773	-0.133092	1	Rmnd5b	E18_vs_PP	CA1	0.413371
0.0781545	0.086546	1	Drap1	E18_vs_PP	CA1	0.413569
0.0781554	0.15574	1	Actl6b	E18_vs_PP	CA1	0.413569
0.0782808	-0.0553192	1	Etfdh	E18_vs_PP	CA1	0.413732
0.0783302	-0.133867	1	Wdr20	E18_vs_PP	CA1	0.413732
0.0783973	-0.154053	1	Mllt10	E18_vs_PP	CA1	0.413732
0.0787558	0.113238	1	Cox7c	E18_vs_PP	CA1	0.415251
0.0789206	0.107764	1	Uqcrh	E18_vs_PP	CA1	0.415747
0.0790251	-0.0661715	1	Cflar	E18_vs_PP	CA1	0.41585
0.0791204	0.158845	1	Smyd2	E18_vs_PP	CA1	0.41585
0.0792215	-0.0144947	1	Cct6a	E18_vs_PP	CA1	0.41585
0.0792229	-0.169243	1	Ddx50	E18_vs_PP	CA1	0.41585
0.0794462	-0.100617	1	Slc17a5	E18_vs_PP	CA1	0.416649
0.0801028	0.0395922	1	Synpo	E18_vs_PP	CA1	0.419719
0.0803651	-0.125687	1	Ganc	E18_vs_PP	CA1	0.420423
0.0804093	-0.0300748	1	Gm996	E18_vs_PP	CA1	0.420423
0.0804942	0.128618	1	Fam102a	E18_vs_PP	CA1	0.420423
0.0805232	0.136081	1	Syngr1	E18_vs_PP	CA1	0.420423
0.0807005	0.0845971	1	Nrsn1	E18_vs_PP	CA1	0.420975
0.0809093	-0.156642	1	Grhl1	E18_vs_PP	CA1	0.421689
0.0811762	-0.12352	1	Plpp1	E18_vs_PP	CA1	0.422706
0.0814514	0.155947	1	Lin54	E18_vs_PP	CA1	0.423763
0.0816871	-0.131159	1	Dars	E18_vs_PP	CA1	0.424222
0.0817196	0.123769	1	Cox6a1	E18_vs_PP	CA1	0.424222
0.0818325	-0.167798	1	Ypel2	E18_vs_PP	CA1	0.424222
0.0818333	-0.11393	1	Get4	E18_vs_PP	CA1	0.424222
0.0819004	-0.114087	1	Kdelr1	E18_vs_PP	CA1	0.424222
0.0820472	0.101256	1	Tspan3	E18_vs_PP	CA1	0.424609
0.0822312	0.111524	1	Gas7	E18_vs_PP	CA1	0.424819
0.0822323	0.139414	1	Tbl1xr1	E18_vs_PP	CA1	0.424819
0.082343	-0.147607	1	Nt5m	E18_vs_PP	CA1	0.425017
0.0824604	0.120158	1	Cdk16	E18_vs_PP	CA1	0.425025
0.0824892	-0.102029	1	Sypl	E18_vs_PP	CA1	0.425025
0.082985	0.201704	1	Arl6ip5	E18_vs_PP	CA1	0.427206
0.0830779	0.0915592	1	Nr3c2	E18_vs_PP	CA1	0.42731
0.0832209	0.070179	1	Ptprr	E18_vs_PP	CA1	0.427671
0.0835292	-0.116292	1	Lrp3	E18_vs_PP	CA1	0.428881
0.0837096	-0.131723	1	Nos1ap	E18_vs_PP	CA1	0.429301
0.0837572	-0.188953	1	Adat1	E18_vs_PP	CA1	0.429301
0.0841208	-0.109201	1	4930509G22Rik	E18_vs_PP	CA1	0.430566
0.0841936	-0.149818	1	Chd9	E18_vs_PP	CA1	0.430566
0.0842236	-0.0890559	1	Arpp21	E18_vs_PP	CA1	0.430566
0.0844341	0.106018	1	Shfm1	E18_vs_PP	CA1	0.431267
0.0845439	-0.0383043	1	Egr1	E18_vs_PP	CA1	0.431453
0.0846535	0.170464	1	Ccsap	E18_vs_PP	CA1	0.431637
0.0849099	0.144749	1	Wnt4	E18_vs_PP	CA1	0.43257
0.0851758	-0.1617	1	Rbm25	E18_vs_PP	CA1	0.433549
0.0853027	-0.0930045	1	Ehbp1	E18_vs_PP	CA1	0.4337
0.0853531	-0.143883	1	Ift80	E18_vs_PP	CA1	0.4337
0.0854592	-0.0736341	1	Cenpv	E18_vs_PP	CA1	0.433859
0.0858125	0.132511	1	Nmt1	E18_vs_PP	CA1	0.433859
0.085826	-0.136574	1	1110032A03Rik	E18_vs_PP	CA1	0.433859
0.0858304	-0.06374	1	Impa1	E18_vs_PP	CA1	0.433859
0.0858584	-0.121787	1	Hipk1	E18_vs_PP	CA1	0.433859
0.0859398	0.131136	1	Rab11fip4	E18_vs_PP	CA1	0.433859
0.0859533	-0.0998969	1	9330159F19Rik	E18_vs_PP	CA1	0.433859
0.0859747	0.125705	1	Otub1	E18_vs_PP	CA1	0.433859
0.0860824	-0.104789	1	Adgrb3	E18_vs_PP	CA1	0.43403
0.0862677	0.0107358	1	Mapk1	E18_vs_PP	CA1	0.434591
0.086514	0.140582	1	Ndufa9	E18_vs_PP	CA1	0.435183
0.0865332	-0.135666	1	Ube4a	E18_vs_PP	CA1	0.435183
0.0866952	-0.00225363	1	Ggnbp2	E18_vs_PP	CA1	0.435304
0.0867054	-0.130032	1	Dnajc21	E18_vs_PP	CA1	0.435304
0.0870284	-0.138296	1	Khdrbs1	E18_vs_PP	CA1	0.435784
0.0870547	0.0744071	1	Ppia	E18_vs_PP	CA1	0.435784
0.08708	0.156383	1	Smim13	E18_vs_PP	CA1	0.435784
0.0870975	0.0857848	1	Cfap97	E18_vs_PP	CA1	0.435784
0.0874236	0.158738	1	Aimp1	E18_vs_PP	CA1	0.437044
0.0875684	-0.0494918	1	Trim24	E18_vs_PP	CA1	0.437396
0.0877311	0.0728932	1	Uchl1	E18_vs_PP	CA1	0.437836
0.0879403	0.133771	1	Cox6b1	E18_vs_PP	CA1	0.438361
0.0881945	0.0736526	1	Rps11	E18_vs_PP	CA1	0.438361
0.0881953	0.135956	1	Kif1a	E18_vs_PP	CA1	0.438361
0.0882586	0.0107552	1	Rhob	E18_vs_PP	CA1	0.438361
0.0883722	0.139553	1	Pole4	E18_vs_PP	CA1	0.438361
0.0884048	0.0670103	1	Cdc5l	E18_vs_PP	CA1	0.438361
0.0884282	-0.0665306	1	Rufy2	E18_vs_PP	CA1	0.438361
0.0884327	-0.124833	1	Smarca1	E18_vs_PP	CA1	0.438361
0.0885815	-0.0324798	1	Ing3	E18_vs_PP	CA1	0.438728
0.0887006	0.175216	1	Calm3	E18_vs_PP	CA1	0.438949
0.0888082	0.144227	1	Dync1li2	E18_vs_PP	CA1	0.439111
0.0889711	-0.125966	1	Nucb1	E18_vs_PP	CA1	0.43932
0.0890906	0.115845	1	Fam134a	E18_vs_PP	CA1	0.43932
0.0891297	0.125388	1	Bcl7b	E18_vs_PP	CA1	0.43932
0.0891552	-0.0934865	1	Slc7a11	E18_vs_PP	CA1	0.43932
0.0892241	-0.017229	1	Tef	E18_vs_PP	CA1	0.43932
0.089356	0.0907504	1	Tomm40	E18_vs_PP	CA1	0.439602
0.0899851	-0.0400964	1	Ap1g1	E18_vs_PP	CA1	0.441961
0.0900106	0.116042	1	Scamp5	E18_vs_PP	CA1	0.441961
0.0900611	-0.0759166	1	Map2	E18_vs_PP	CA1	0.441961
0.0901373	-0.0859953	1	Mchr1	E18_vs_PP	CA1	0.441966
0.0903214	-0.132308	1	Slc26a4	E18_vs_PP	CA1	0.4425
0.0908267	-0.122282	1	Cdc16	E18_vs_PP	CA1	0.444605
0.0909469	0.0133309	1	Acap2	E18_vs_PP	CA1	0.444823
0.0911475	0.0648886	1	Garnl3	E18_vs_PP	CA1	0.445085
0.0912156	0.123001	1	Ppp2r2a	E18_vs_PP	CA1	0.445085
0.0912277	0.0751609	1	Fam175b	E18_vs_PP	CA1	0.445085
0.0915898	-0.0904922	1	Uhrf1bp1l	E18_vs_PP	CA1	0.446481
0.0916866	-0.052409	1	Atp6v1c1	E18_vs_PP	CA1	0.446583
0.0919063	0.111184	1	Glrx5	E18_vs_PP	CA1	0.447021
0.0919287	-0.0807988	1	Rnft2	E18_vs_PP	CA1	0.447021
0.092057	-0.0698015	1	Srsf7	E18_vs_PP	CA1	0.447275
0.0921425	0.212874	1	Fyttd1	E18_vs_PP	CA1	0.447321
0.09246	-0.081496	1	Rsrp1	E18_vs_PP	CA1	0.448036
0.0924654	0.130383	1	Mapkapk2	E18_vs_PP	CA1	0.448036
0.0925184	-0.157612	1	4933427D14Rik	E18_vs_PP	CA1	0.448036
0.0926031	-0.145782	1	Mark3	E18_vs_PP	CA1	0.448077
0.0927289	-0.0302537	1	Pik3c3	E18_vs_PP	CA1	0.448317
0.0928095	-0.0520647	1	Fam21	E18_vs_PP	CA1	0.448338
0.093217	0.157609	1	Pknox2	E18_vs_PP	CA1	0.449937
0.0935606	-0.108201	1	Eno2	E18_vs_PP	CA1	0.451225
0.0938389	-0.0840588	1	Commd8	E18_vs_PP	CA1	0.452196
0.0941168	0.0816773	1	Platr9	E18_vs_PP	CA1	0.453164
0.0944764	0.162807	1	Ppm1k	E18_vs_PP	CA1	0.454523
0.0946332	-0.125935	1	Kcnc2	E18_vs_PP	CA1	0.454905
0.0947309	-0.164912	1	Tfg	E18_vs_PP	CA1	0.455002
0.0949152	-0.1272	1	Zfp398	E18_vs_PP	CA1	0.455515
0.0953352	0.132183	1	Hlf	E18_vs_PP	CA1	0.455586
0.0953428	0.120109	1	Psmb5	E18_vs_PP	CA1	0.455586
0.0953676	-0.122821	1	Trp53bp1	E18_vs_PP	CA1	0.455586
0.0953935	-0.00227988	1	Mdga2	E18_vs_PP	CA1	0.455586
0.0954244	0.161766	1	Lsm8	E18_vs_PP	CA1	0.455586
0.0954816	0.156123	1	Epha10	E18_vs_PP	CA1	0.455586
0.0955031	0.109487	1	Usf2	E18_vs_PP	CA1	0.455586
0.0955769	-0.0735319	1	Hdac5	E18_vs_PP	CA1	0.455586
0.0956274	-0.0751303	1	Ndufs7	E18_vs_PP	CA1	0.455586
0.095813	0.126587	1	Lrch2	E18_vs_PP	CA1	0.456101
0.0959333	-0.124665	1	Pcmtd1	E18_vs_PP	CA1	0.456304
0.0962637	0.09445	1	Sec61g	E18_vs_PP	CA1	0.457506
0.0965435	-0.0871484	1	Dpm2	E18_vs_PP	CA1	0.458201
0.0965658	-0.137525	1	BC005537	E18_vs_PP	CA1	0.458201
0.0966446	-0.0812306	1	Wdr26	E18_vs_PP	CA1	0.458205
0.0968431	0.0753376	1	Ppp3cb	E18_vs_PP	CA1	0.458776
0.097206	-0.119333	1	Pnn	E18_vs_PP	CA1	0.460124
0.0974999	-0.0187989	1	Vps39	E18_vs_PP	CA1	0.460823
0.0975103	-0.0981492	1	Aatf	E18_vs_PP	CA1	0.460823
0.0979398	-0.13647	1	Fam213a	E18_vs_PP	CA1	0.46216
0.0980544	0.127682	1	Lypla2	E18_vs_PP	CA1	0.46216
0.0980572	-0.144878	1	Tfdp2	E18_vs_PP	CA1	0.46216
0.0981079	0.0276286	1	Sec23b	E18_vs_PP	CA1	0.46216
0.0982842	0.00520526	1	Tmpo	E18_vs_PP	CA1	0.462594
0.0983893	0.122275	1	Kcnj3	E18_vs_PP	CA1	0.462594
0.0984361	0.105591	1	Thrb	E18_vs_PP	CA1	0.462594
0.0986071	-0.0622975	1	Ewsr1	E18_vs_PP	CA1	0.463028
0.0989107	-0.148891	1	Rnf215	E18_vs_PP	CA1	0.464083
0.0990136	-0.13595	1	Ppp2r5c	E18_vs_PP	CA1	0.464195
0.0992243	0.135916	1	6430548M08Rik	E18_vs_PP	CA1	0.464813
0.0995868	-0.0644518	1	Zbtb8os	E18_vs_PP	CA1	0.465487
0.0998165	0.0921837	1	Abca2	E18_vs_PP	CA1	0.465487
0.099879	0.17728	1	Arrdc3	E18_vs_PP	CA1	0.465487
0.099892	0.124424	1	Csde1	E18_vs_PP	CA1	0.465487
0.100057	0.173212	1	Atp1a1	E18_vs_PP	CA1	0.465487
0.100161	0.150646	1	Tmem33	E18_vs_PP	CA1	0.465487
0.100215	0.128835	1	Fam155a	E18_vs_PP	CA1	0.465487
0.100251	-0.00629801	1	Rad21	E18_vs_PP	CA1	0.465487
0.100327	0.0236204	1	Mpc2	E18_vs_PP	CA1	0.465487
0.10035	0.0460159	1	Prmt5	E18_vs_PP	CA1	0.465487
0.100383	-0.019045	1	Alg2	E18_vs_PP	CA1	0.465487
0.100393	0.0531405	1	Atp1b2	E18_vs_PP	CA1	0.465487
0.100564	-0.113038	1	Cep295	E18_vs_PP	CA1	0.465487
0.100575	0.0652684	1	Tsen15	E18_vs_PP	CA1	0.465487
0.100633	-0.126698	1	Appl1	E18_vs_PP	CA1	0.465487
0.100635	-0.136134	1	Ttc21b	E18_vs_PP	CA1	0.465487
0.100955	0.127771	1	Clcn2	E18_vs_PP	CA1	0.466415
0.10102	0.14352	1	Fbxo31	E18_vs_PP	CA1	0.466415
0.101112	-0.0669824	1	Mrps26	E18_vs_PP	CA1	0.466415
0.101153	-0.00791756	1	Uhrf2	E18_vs_PP	CA1	0.466415
0.101332	0.126204	1	Lgmn	E18_vs_PP	CA1	0.466751
0.101433	-0.101472	1	Dnaja2	E18_vs_PP	CA1	0.466751
0.101528	-0.00564561	1	Map2k7	E18_vs_PP	CA1	0.466751
0.101544	-0.0762467	1	Celf2	E18_vs_PP	CA1	0.466751
0.101656	-0.0758856	1	Gpm6b	E18_vs_PP	CA1	0.466903
0.101901	0.104722	1	Zfp780b	E18_vs_PP	CA1	0.467665
0.102133	0.0894466	1	Map1b	E18_vs_PP	CA1	0.468092
0.102154	-0.126755	1	Fam69a	E18_vs_PP	CA1	0.468092
0.102334	-0.13455	1	1110059G10Rik	E18_vs_PP	CA1	0.468552
0.102555	0.0919719	1	Ocstamp	E18_vs_PP	CA1	0.469198
0.102977	0.0998693	1	Psmd6	E18_vs_PP	CA1	0.470764
0.103126	-0.109153	1	Ccdc127	E18_vs_PP	CA1	0.471077
0.103467	-0.101944	1	Prpf40a	E18_vs_PP	CA1	0.472271
0.103615	0.144032	1	Ddx42	E18_vs_PP	CA1	0.472577
0.103752	-0.0953942	1	Rab8b	E18_vs_PP	CA1	0.472834
0.103844	0.105129	1	Kcnk2	E18_vs_PP	CA1	0.47289
0.104024	-0.082094	1	Saraf	E18_vs_PP	CA1	0.47334
0.104242	0.109539	1	Hcfc1r1	E18_vs_PP	CA1	0.47372
0.104268	-0.0732759	1	Zfp947	E18_vs_PP	CA1	0.47372
0.104385	0.0524033	1	Fam222b	E18_vs_PP	CA1	0.473882
0.104473	0.0511505	1	Dusp3	E18_vs_PP	CA1	0.473918
0.104699	-0.119157	1	Gm19938	E18_vs_PP	CA1	0.474576
0.104884	0.162913	1	Armcx3	E18_vs_PP	CA1	0.475049
0.105054	0.135207	1	Gna11	E18_vs_PP	CA1	0.475452
0.105154	-0.106655	1	Cacna1e	E18_vs_PP	CA1	0.475537
0.105318	0.0406503	1	Mark1	E18_vs_PP	CA1	0.475758
0.105518	-0.158123	1	Wdr61	E18_vs_PP	CA1	0.475758
0.105534	-0.0593239	1	Slc25a51	E18_vs_PP	CA1	0.475758
0.105543	-0.0461695	1	Lingo1	E18_vs_PP	CA1	0.475758
0.105733	-0.118203	1	Timm9	E18_vs_PP	CA1	0.475758
0.10581	0.100786	1	Ly6e	E18_vs_PP	CA1	0.475758
0.105813	-0.134419	1	Gm10031	E18_vs_PP	CA1	0.475758
0.10585	-0.0929686	1	Kcmf1	E18_vs_PP	CA1	0.475758
0.106167	0.0776613	1	Ica1	E18_vs_PP	CA1	0.476519
0.106268	-0.113519	1	Sntg1	E18_vs_PP	CA1	0.476519
0.106364	-0.145242	1	Ccdc174	E18_vs_PP	CA1	0.476519
0.106411	-0.115103	1	Dmd	E18_vs_PP	CA1	0.476519
0.106424	0.153037	1	Plaa	E18_vs_PP	CA1	0.476519
0.106519	-0.0676465	1	Zfp385b	E18_vs_PP	CA1	0.476578
0.106953	-0.1156	1	Phyhd1	E18_vs_PP	CA1	0.477855
0.107186	0.0242316	1	Hyou1	E18_vs_PP	CA1	0.477855
0.107194	-0.15501	1	Wdfy3	E18_vs_PP	CA1	0.477855
0.107204	0.110862	1	Rbx1	E18_vs_PP	CA1	0.477855
0.107211	-0.138661	1	Sfpq	E18_vs_PP	CA1	0.477855
0.1076	0.113965	1	Arl2bp	E18_vs_PP	CA1	0.478587
0.107605	-0.104369	1	Dennd2a	E18_vs_PP	CA1	0.478587
0.107619	0.125977	1	Slitrk4	E18_vs_PP	CA1	0.478587
0.107777	-0.0985819	1	Sar1b	E18_vs_PP	CA1	0.47893
0.107919	0.113524	1	Ezh1	E18_vs_PP	CA1	0.479198
0.108258	0.133502	1	Hk1	E18_vs_PP	CA1	0.480339
0.108446	-0.0627511	1	Sdcbp	E18_vs_PP	CA1	0.480663
0.108532	0.139418	1	Prdx3	E18_vs_PP	CA1	0.480663
0.108576	-0.112922	1	Specc1	E18_vs_PP	CA1	0.480663
0.109079	0.151883	1	Pik3r3	E18_vs_PP	CA1	0.48247
0.109237	0.0125221	1	Dgkg	E18_vs_PP	CA1	0.48247
0.109253	-0.0611936	1	Hars	E18_vs_PP	CA1	0.48247
0.10934	-0.18541	1	Rspo2	E18_vs_PP	CA1	0.48247
0.109395	0.0705001	1	Rasgrp1	E18_vs_PP	CA1	0.48247
0.109757	0.142352	1	Adap1	E18_vs_PP	CA1	0.483482
0.109789	-0.131336	1	Hrk	E18_vs_PP	CA1	0.483482
0.110225	-0.0722325	1	Tdrd7	E18_vs_PP	CA1	0.485039
0.110576	-0.130538	1	5530601H04Rik	E18_vs_PP	CA1	0.486218
0.110878	0.0488997	1	Sept4	E18_vs_PP	CA1	0.486899
0.110986	0.126175	1	Tcf25	E18_vs_PP	CA1	0.486899
0.111154	0.12192	1	Eif4b	E18_vs_PP	CA1	0.486899
0.111156	-0.125035	1	Mboat2	E18_vs_PP	CA1	0.486899
0.111249	0.0247506	1	Prkcz	E18_vs_PP	CA1	0.486899
0.111355	0.0383386	1	Bhlhe40	E18_vs_PP	CA1	0.486899
0.111377	-0.111024	1	Gin1	E18_vs_PP	CA1	0.486899
0.111397	-0.0334431	1	Faah	E18_vs_PP	CA1	0.486899
0.111546	0.136462	1	Prkca	E18_vs_PP	CA1	0.486899
0.111559	-0.128027	1	Uba6	E18_vs_PP	CA1	0.486899
0.111735	-0.153337	1	Mysm1	E18_vs_PP	CA1	0.487305
0.111991	0.00171455	1	Ndufc1	E18_vs_PP	CA1	0.487483
0.112005	0.0290753	1	Polr2l	E18_vs_PP	CA1	0.487483
0.112024	0.153072	1	Tshz2	E18_vs_PP	CA1	0.487483
0.11231	-0.120326	1	Snx16	E18_vs_PP	CA1	0.488366
0.112534	-0.0789905	1	Ttc9c	E18_vs_PP	CA1	0.488976
0.11265	0.135331	1	B4galt5	E18_vs_PP	CA1	0.489121
0.112821	-0.137439	1	Rasa2	E18_vs_PP	CA1	0.489501
0.113052	0.107633	1	Cadm2	E18_vs_PP	CA1	0.489988
0.113178	0.122065	1	Comt	E18_vs_PP	CA1	0.489988
0.113183	-0.0967162	1	Trim2	E18_vs_PP	CA1	0.489988
0.113942	0.075476	1	Spryd7	E18_vs_PP	CA1	0.492909
0.11416	-0.084622	1	Plk2	E18_vs_PP	CA1	0.493488
0.114326	-0.016699	1	Psma5	E18_vs_PP	CA1	0.493846
0.114736	-0.1132	1	Ube2l3	E18_vs_PP	CA1	0.495016
0.114882	-0.138571	1	Trappc11	E18_vs_PP	CA1	0.495016
0.114952	-0.134711	1	Gatad2b	E18_vs_PP	CA1	0.495016
0.114974	0.131144	1	Lrrc4	E18_vs_PP	CA1	0.495016
0.115031	0.130657	1	Dda1	E18_vs_PP	CA1	0.495016
0.115102	0.0955833	1	Hacd3	E18_vs_PP	CA1	0.495016
0.115252	0.156976	1	Mgll	E18_vs_PP	CA1	0.495295
0.115455	-0.102089	1	Arntl	E18_vs_PP	CA1	0.495664
0.115506	-0.13479	1	Lrch3	E18_vs_PP	CA1	0.495664
0.115818	-0.0104736	1	Slco2a1	E18_vs_PP	CA1	0.49664
0.116141	0.118937	1	Cdc40	E18_vs_PP	CA1	0.497455
0.116315	-0.167724	1	Slit2	E18_vs_PP	CA1	0.497455
0.116325	-0.137777	1	Smarcad1	E18_vs_PP	CA1	0.497455
0.116346	0.139448	1	Clcn7	E18_vs_PP	CA1	0.497455
0.116443	-0.172688	1	Cmpk1	E18_vs_PP	CA1	0.497506
0.116609	-0.0952366	1	Slitrk1	E18_vs_PP	CA1	0.497855
0.116843	0.0461356	1	Rps29	E18_vs_PP	CA1	0.498176
0.116854	-0.0497684	1	Mmp16	E18_vs_PP	CA1	0.498176
0.117914	-0.131468	1	Lmtk2	E18_vs_PP	CA1	0.502332
0.118102	-0.110974	1	Otud7b	E18_vs_PP	CA1	0.502769
0.118479	-0.00382646	1	Cnbp	E18_vs_PP	CA1	0.502902
0.118531	0.0932024	1	Aplp2	E18_vs_PP	CA1	0.502902
0.118659	0.139143	1	Abcb9	E18_vs_PP	CA1	0.502902
0.118668	0.032278	1	Tbp	E18_vs_PP	CA1	0.502902
0.118698	0.0936342	1	Atp6v1b2	E18_vs_PP	CA1	0.502902
0.118765	-0.154004	1	Dmtf1	E18_vs_PP	CA1	0.502902
0.11877	-0.103829	1	Hspb11	E18_vs_PP	CA1	0.502902
0.118873	-0.0993038	1	Zfhx2	E18_vs_PP	CA1	0.502902
0.118904	0.130879	1	Txndc15	E18_vs_PP	CA1	0.502902
0.119102	-0.0854329	1	Gtpbp2	E18_vs_PP	CA1	0.50314
0.119131	-0.0570376	1	Wdr17	E18_vs_PP	CA1	0.50314
0.119433	-0.0923024	1	Rab26	E18_vs_PP	CA1	0.504055
0.119627	0.103696	1	Armc1	E18_vs_PP	CA1	0.504512
0.119939	-0.0791249	1	Gid4	E18_vs_PP	CA1	0.505463
0.12017	-0.109204	1	Mterf3	E18_vs_PP	CA1	0.505709
0.12022	0.101812	1	Ddx17	E18_vs_PP	CA1	0.505709
0.120255	0.0956781	1	Eif1	E18_vs_PP	CA1	0.505709
0.120457	0.122913	1	Cdk2ap1	E18_vs_PP	CA1	0.506156
0.120609	0.115821	1	Stx12	E18_vs_PP	CA1	0.506156
0.120737	0.162016	1	Nap1l5	E18_vs_PP	CA1	0.506156
0.120775	-0.0810239	1	Nptn	E18_vs_PP	CA1	0.506156
0.120792	0.118221	1	Ufd1l	E18_vs_PP	CA1	0.506156
0.120978	-0.0815071	1	Ccnt2	E18_vs_PP	CA1	0.506368
0.121081	0.117075	1	Ckmt1	E18_vs_PP	CA1	0.506368
0.121173	0.135061	1	Ndufs5	E18_vs_PP	CA1	0.506368
0.121187	0.0560544	1	Rhot2	E18_vs_PP	CA1	0.506368
0.121323	-0.0413304	1	Mob4	E18_vs_PP	CA1	0.506574
0.121546	0.10729	1	Pitpnm2	E18_vs_PP	CA1	0.506771
0.121593	-0.160742	1	Auh	E18_vs_PP	CA1	0.506771
0.121632	0.155086	1	Mfap1b	E18_vs_PP	CA1	0.506771
0.121715	-0.0751717	1	Kcnmb4	E18_vs_PP	CA1	0.506771
0.12189	0.0850904	1	Orc5	E18_vs_PP	CA1	0.507142
0.121983	0.129335	1	Ctsd	E18_vs_PP	CA1	0.50717
0.122146	-0.117994	1	Desi2	E18_vs_PP	CA1	0.50749
0.122374	0.112912	1	Cfl2	E18_vs_PP	CA1	0.507919
0.122422	0.154207	1	Scg3	E18_vs_PP	CA1	0.507919
0.122753	-0.0510903	1	Mydgf	E18_vs_PP	CA1	0.508269
0.122777	0.0237712	1	Icam5	E18_vs_PP	CA1	0.508269
0.122885	-0.0869416	1	Abhd12	E18_vs_PP	CA1	0.508269
0.122913	0.0642885	1	Gabbr1	E18_vs_PP	CA1	0.508269
0.122939	-0.124211	1	Arhgef28	E18_vs_PP	CA1	0.508269
0.123171	0.113933	1	Nfix	E18_vs_PP	CA1	0.508765
0.123232	0.0882603	1	Rnf208	E18_vs_PP	CA1	0.508765
0.123494	0.0718909	1	Mkrn1	E18_vs_PP	CA1	0.509489
0.123665	0.0332621	1	Zmat2	E18_vs_PP	CA1	0.509835
0.123782	0.152191	1	Gfpt1	E18_vs_PP	CA1	0.509936
0.123863	-0.115303	1	Rcor3	E18_vs_PP	CA1	0.509936
0.124201	-0.105503	1	Atxn2	E18_vs_PP	CA1	0.510971
0.124312	-0.0877078	1	Gabra2	E18_vs_PP	CA1	0.511069
0.124604	-0.110801	1	Rmdn1	E18_vs_PP	CA1	0.511411
0.124606	-0.130388	1	Neu1	E18_vs_PP	CA1	0.511411
0.124664	0.163572	1	Peg3	E18_vs_PP	CA1	0.511411
0.124921	-0.0472046	1	Lrrc7	E18_vs_PP	CA1	0.511411
0.125017	-0.12584	1	Trpc1	E18_vs_PP	CA1	0.511411
0.125216	-0.089586	1	BC023829	E18_vs_PP	CA1	0.511411
0.125229	-0.00916936	1	Rps15	E18_vs_PP	CA1	0.511411
0.125287	0.00362583	1	Ids	E18_vs_PP	CA1	0.511411
0.125347	0.03406	1	Cyb5a	E18_vs_PP	CA1	0.511411
0.125435	-0.116242	1	Zfp639	E18_vs_PP	CA1	0.511411
0.125472	0.11204	1	Asb13	E18_vs_PP	CA1	0.511411
0.125733	-0.116698	1	Jmy	E18_vs_PP	CA1	0.511411
0.125805	-0.125786	1	Me3	E18_vs_PP	CA1	0.511411
0.125819	0.124273	1	Zdhhc3	E18_vs_PP	CA1	0.511411
0.125834	-0.106575	1	Celf1	E18_vs_PP	CA1	0.511411
0.125885	-0.131667	1	Gm10660	E18_vs_PP	CA1	0.511411
0.125906	-0.0503479	1	Nsmce4a	E18_vs_PP	CA1	0.511411
0.125961	-0.0854762	1	Ints10	E18_vs_PP	CA1	0.511411
0.126185	0.06298	1	Brinp2	E18_vs_PP	CA1	0.511966
0.126689	-0.135505	1	Ipmk	E18_vs_PP	CA1	0.513658
0.127084	-0.109768	1	Hes7	E18_vs_PP	CA1	0.514313
0.127117	-0.063143	1	Slc24a3	E18_vs_PP	CA1	0.514313
0.12726	0.122575	1	Tmem18	E18_vs_PP	CA1	0.514313
0.127282	0.0986386	1	Slc39a9	E18_vs_PP	CA1	0.514313
0.127401	-0.118394	1	Katnbl1	E18_vs_PP	CA1	0.514313
0.127483	0.0555108	1	Nfia	E18_vs_PP	CA1	0.514313
0.127679	-0.12649	1	Usp4	E18_vs_PP	CA1	0.514313
0.127714	-0.119333	1	Bcap29	E18_vs_PP	CA1	0.514313
0.127749	0.115632	1	Zfp365	E18_vs_PP	CA1	0.514313
0.12778	-0.102961	1	Calcoco1	E18_vs_PP	CA1	0.514313
0.127813	-0.0887991	1	Gopc	E18_vs_PP	CA1	0.514313
0.127944	0.12514	1	Marcks	E18_vs_PP	CA1	0.514488
0.128231	-0.120438	1	Emc6	E18_vs_PP	CA1	0.514749
0.128298	-0.139028	1	Arl14ep	E18_vs_PP	CA1	0.514749
0.128321	0.0135716	1	Capn2	E18_vs_PP	CA1	0.514749
0.128369	-0.100698	1	4933427I04Rik	E18_vs_PP	CA1	0.514749
0.128466	-0.17753	1	Gpr155	E18_vs_PP	CA1	0.514749
0.128534	0.12885	1	Asb7	E18_vs_PP	CA1	0.514749
0.12875	0.0715861	1	AU040320	E18_vs_PP	CA1	0.515264
0.129092	-0.117579	1	Xpo1	E18_vs_PP	CA1	0.516181
0.129202	-0.05576	1	Gtf3c4	E18_vs_PP	CA1	0.516181
0.129243	-0.153745	1	Sec31a	E18_vs_PP	CA1	0.516181
0.129415	-0.0738361	1	Svop	E18_vs_PP	CA1	0.516519
0.129537	-0.130976	1	Ociad2	E18_vs_PP	CA1	0.516655
0.129824	0.110068	1	Ganab	E18_vs_PP	CA1	0.517448
0.129965	0.0128551	1	Mboat7	E18_vs_PP	CA1	0.517462
0.130004	0.105	1	Mdh2	E18_vs_PP	CA1	0.517462
0.130501	0.134943	1	Dnajc30	E18_vs_PP	CA1	0.518744
0.130652	-0.125296	1	Tiparp	E18_vs_PP	CA1	0.518744
0.130677	0.064037	1	Hpca	E18_vs_PP	CA1	0.518744
0.130735	-0.0544426	1	Paqr9	E18_vs_PP	CA1	0.518744
0.130767	-0.105375	1	Pitpna	E18_vs_PP	CA1	0.518744
0.131061	0.132208	1	Ctnnd2	E18_vs_PP	CA1	0.51945
0.131121	-0.050608	1	Ptprg	E18_vs_PP	CA1	0.51945
0.131326	-0.122195	1	Ptpn2	E18_vs_PP	CA1	0.519598
0.131336	-0.0911455	1	Acss2	E18_vs_PP	CA1	0.519598
0.13182	-0.116952	1	Cab39	E18_vs_PP	CA1	0.520937
0.131851	-0.0136773	1	Mllt3	E18_vs_PP	CA1	0.520937
0.131977	0.0763809	1	Nkain2	E18_vs_PP	CA1	0.521085
0.132167	-0.143929	1	Hunk	E18_vs_PP	CA1	0.521484
0.132261	0.132014	1	Park7	E18_vs_PP	CA1	0.521505
0.132412	0.0969612	1	Islr2	E18_vs_PP	CA1	0.521627
0.13247	0.153207	1	Gorasp2	E18_vs_PP	CA1	0.521627
0.132672	-0.0858528	1	Tmod3	E18_vs_PP	CA1	0.52172
0.13269	0.146625	1	Dpysl2	E18_vs_PP	CA1	0.52172
0.132803	-0.0493687	1	Tmtc1	E18_vs_PP	CA1	0.52172
0.132848	0.109099	1	Rpl41	E18_vs_PP	CA1	0.52172
0.133008	-0.0979191	1	Ssb	E18_vs_PP	CA1	0.522
0.133289	-0.113828	1	Cdc42bpa	E18_vs_PP	CA1	0.522252
0.133396	-0.0386481	1	Magi2	E18_vs_PP	CA1	0.522252
0.133405	-0.0789415	1	Armcx1	E18_vs_PP	CA1	0.522252
0.133428	-0.0546395	1	Prkacb	E18_vs_PP	CA1	0.522252
0.133589	-0.0677825	1	Psmd11	E18_vs_PP	CA1	0.522534
0.133983	0.160826	1	Znhit3	E18_vs_PP	CA1	0.523726
0.134072	-0.111957	1	Lrp11	E18_vs_PP	CA1	0.523726
0.134174	-0.0502431	1	Rp9	E18_vs_PP	CA1	0.523776
0.134341	0.0625571	1	Crmp1	E18_vs_PP	CA1	0.52408
0.134579	0.141226	1	Fam3c	E18_vs_PP	CA1	0.524663
0.134829	-0.043481	1	Birc6	E18_vs_PP	CA1	0.524895
0.134983	-0.0347412	1	Ric8b	E18_vs_PP	CA1	0.524895
0.135104	-0.00424682	1	Tceb1	E18_vs_PP	CA1	0.524895
0.135221	0.122006	1	Pip4k2c	E18_vs_PP	CA1	0.524895
0.135293	-0.0236891	1	Tbcel	E18_vs_PP	CA1	0.524895
0.135296	0.114605	1	Dlg3	E18_vs_PP	CA1	0.524895
0.13542	-0.00127552	1	Cep57l1	E18_vs_PP	CA1	0.524895
0.135428	-0.101876	1	Srek1	E18_vs_PP	CA1	0.524895
0.135442	-0.128035	1	Slc11a2	E18_vs_PP	CA1	0.524895
0.135633	0.124157	1	Cox5b	E18_vs_PP	CA1	0.525127
0.135686	-0.0849139	1	Uqcc1	E18_vs_PP	CA1	0.525127
0.135773	-0.0369058	1	Med16	E18_vs_PP	CA1	0.525127
0.13586	0.0319007	1	Ccnd2	E18_vs_PP	CA1	0.525127
0.136059	-0.0956277	1	Pnrc2	E18_vs_PP	CA1	0.525551
0.13624	-0.155939	1	Nr4a3	E18_vs_PP	CA1	0.525905
0.136375	-0.0642274	1	Trip11	E18_vs_PP	CA1	0.526083
0.136609	-0.0959002	1	Lrrc49	E18_vs_PP	CA1	0.526638
0.136849	-0.0411474	1	Robo1	E18_vs_PP	CA1	0.52722
0.137041	-0.0742014	1	Phactr3	E18_vs_PP	CA1	0.527243
0.137087	0.142756	1	Pantr1	E18_vs_PP	CA1	0.527243
0.137124	0.114812	1	Camta1	E18_vs_PP	CA1	0.527243
0.137329	-0.10257	1	Bbip1	E18_vs_PP	CA1	0.527358
0.137394	0.163118	1	Socs5	E18_vs_PP	CA1	0.527358
0.137439	-0.129099	1	Rbm6	E18_vs_PP	CA1	0.527358
0.137513	0.00301199	1	Zfp346	E18_vs_PP	CA1	0.527358
0.137827	-0.0965487	1	Spats2	E18_vs_PP	CA1	0.527676
0.137855	-0.172074	1	Tram1l1	E18_vs_PP	CA1	0.527676
0.137865	-0.00671064	1	Lats2	E18_vs_PP	CA1	0.527676
0.138041	-0.0693691	1	mt-Atp8	E18_vs_PP	CA1	0.528006
0.138277	0.120232	1	Hspa4	E18_vs_PP	CA1	0.528563
0.138535	0.11029	1	Rae1	E18_vs_PP	CA1	0.529205
0.13869	0.070396	1	Ugcg	E18_vs_PP	CA1	0.529454
0.138857	0.122672	1	Tanc1	E18_vs_PP	CA1	0.529748
0.139223	-0.189102	1	Tada2a	E18_vs_PP	CA1	0.530801
0.139354	-0.100108	1	Tspan9	E18_vs_PP	CA1	0.530953
0.139591	0.0837683	1	Mllt11	E18_vs_PP	CA1	0.531512
0.139893	-0.0301607	1	Zfp60	E18_vs_PP	CA1	0.532319
0.140233	0.0870269	1	Pno1	E18_vs_PP	CA1	0.533265
0.140493	0.135699	1	Hnrnpul2	E18_vs_PP	CA1	0.533845
0.140568	-0.0625527	1	Lhx2	E18_vs_PP	CA1	0.533845
0.140657	0.062057	1	Man1a	E18_vs_PP	CA1	0.533845
0.140892	-0.0702569	1	Pecam1	E18_vs_PP	CA1	0.534056
0.140978	0.154809	1	Laptm4a	E18_vs_PP	CA1	0.534056
0.141026	0.122394	1	Adam28	E18_vs_PP	CA1	0.534056
0.141327	-0.119456	1	Chuk	E18_vs_PP	CA1	0.534056
0.141361	0.0938113	1	Cnot10	E18_vs_PP	CA1	0.534056
0.141372	-0.0288816	1	Kifap3	E18_vs_PP	CA1	0.534056
0.141404	0.0363113	1	Rack1	E18_vs_PP	CA1	0.534056
0.14144	-0.0915981	1	Cbfa2t2	E18_vs_PP	CA1	0.534056
0.141659	-0.109166	1	Hipk3	E18_vs_PP	CA1	0.534541
0.142112	-0.0603475	1	Gm17615	E18_vs_PP	CA1	0.535415
0.142179	-0.104363	1	Zfp65	E18_vs_PP	CA1	0.535415
0.142217	0.0307362	1	2500004C02Rik	E18_vs_PP	CA1	0.535415
0.142255	0.106144	1	Spin1	E18_vs_PP	CA1	0.535415
0.142589	-0.101488	1	Dtnb	E18_vs_PP	CA1	0.535943
0.14273	0.134107	1	Kif1b	E18_vs_PP	CA1	0.535943
0.142775	-0.136846	1	Nr4a2	E18_vs_PP	CA1	0.535943
0.142875	-0.0991906	1	Myt1l	E18_vs_PP	CA1	0.535943
0.142914	0.0852809	1	Tmem167b	E18_vs_PP	CA1	0.535943
0.142962	0.0111736	1	Sec23ip	E18_vs_PP	CA1	0.535943
0.143034	-0.110553	1	Ces2b	E18_vs_PP	CA1	0.535943
0.143312	0.0571571	1	Plekha6	E18_vs_PP	CA1	0.536646
0.143515	-0.0885813	1	4833420G17Rik	E18_vs_PP	CA1	0.537063
0.143743	0.116802	1	Clvs1	E18_vs_PP	CA1	0.537575
0.143848	-0.0142537	1	Armt1	E18_vs_PP	CA1	0.537625
0.143955	-0.100076	1	Mrps10	E18_vs_PP	CA1	0.537681
0.14439	-0.0198981	1	Atxn3	E18_vs_PP	CA1	0.53875
0.144434	-0.141971	1	Tada2b	E18_vs_PP	CA1	0.53875
0.144516	-0.0829444	1	Mfhas1	E18_vs_PP	CA1	0.53875
0.145073	0.0375842	1	Arhgap44	E18_vs_PP	CA1	0.540482
0.145344	-0.0234913	1	Dnajc16	E18_vs_PP	CA1	0.540801
0.145358	-0.0636279	1	Brca2	E18_vs_PP	CA1	0.540801
0.145434	0.10606	1	Npm1	E18_vs_PP	CA1	0.540801
0.145595	-0.148769	1	Abca8b	E18_vs_PP	CA1	0.541
0.145672	0.0468391	1	Pdha1	E18_vs_PP	CA1	0.541
0.146091	0.0570293	1	Stmn4	E18_vs_PP	CA1	0.542215
0.146186	0.0582884	1	Polr2e	E18_vs_PP	CA1	0.542226
0.146417	0.114069	1	Chchd1	E18_vs_PP	CA1	0.542429
0.14645	-0.0983728	1	Taok2	E18_vs_PP	CA1	0.542429
0.146632	-0.0354099	1	Mrpl19	E18_vs_PP	CA1	0.542429
0.146718	0.0721381	1	Phax	E18_vs_PP	CA1	0.542429
0.14672	-0.146447	1	Yod1	E18_vs_PP	CA1	0.542429
0.146849	-0.112768	1	Evl	E18_vs_PP	CA1	0.542429
0.146887	-0.0811782	1	Gm15446	E18_vs_PP	CA1	0.542429
0.147128	-0.0338733	1	Puf60	E18_vs_PP	CA1	0.542979
0.147318	0.0642906	1	Bcl11b	E18_vs_PP	CA1	0.54334
0.147667	-0.0617195	1	Slc12a2	E18_vs_PP	CA1	0.543482
0.147811	-0.0821878	1	Cpne6	E18_vs_PP	CA1	0.543482
0.147925	-0.103192	1	Snhg1	E18_vs_PP	CA1	0.543482
0.148109	-0.0715562	1	Rnf121	E18_vs_PP	CA1	0.543482
0.148164	-0.118448	1	Dancr	E18_vs_PP	CA1	0.543482
0.148167	-0.0942674	1	Smad4	E18_vs_PP	CA1	0.543482
0.148219	0.0532664	1	Dner	E18_vs_PP	CA1	0.543482
0.148247	-0.020178	1	Grem2	E18_vs_PP	CA1	0.543482
0.148305	0.0323309	1	Zfp770	E18_vs_PP	CA1	0.543482
0.148368	-0.0979509	1	Akap6	E18_vs_PP	CA1	0.543482
0.148429	-0.0446523	1	Celsr2	E18_vs_PP	CA1	0.543482
0.148543	0.129599	1	Pfdn1	E18_vs_PP	CA1	0.543482
0.148559	0.05646	1	Agbl3	E18_vs_PP	CA1	0.543482
0.148827	0.0490246	1	Osbp2	E18_vs_PP	CA1	0.544126
0.149025	-0.111919	1	Cacybp	E18_vs_PP	CA1	0.544194
0.149031	-0.0431375	1	Ano3	E18_vs_PP	CA1	0.544194
0.149176	0.0646978	1	Sgsm2	E18_vs_PP	CA1	0.544345
0.149257	0.00478157	1	Acin1	E18_vs_PP	CA1	0.544345
0.149436	-0.116438	1	Wbp11	E18_vs_PP	CA1	0.544491
0.149558	-0.136742	1	Mpdz	E18_vs_PP	CA1	0.544491
0.149575	0.103633	1	Lmbrd1	E18_vs_PP	CA1	0.544491
0.149824	-0.107322	1	Tulp4	E18_vs_PP	CA1	0.544959
0.150158	0.12014	1	Sytl2	E18_vs_PP	CA1	0.544959
0.150172	0.115682	1	Rab15	E18_vs_PP	CA1	0.544959
0.150192	0.131077	1	Smpd1	E18_vs_PP	CA1	0.544959
0.150211	0.134576	1	Madd	E18_vs_PP	CA1	0.544959
0.15026	0.0277736	1	Lasp1	E18_vs_PP	CA1	0.544959
0.150527	-0.0339989	1	Mier1	E18_vs_PP	CA1	0.545592
0.150975	-0.0524609	1	Fmnl2	E18_vs_PP	CA1	0.546312
0.151046	0.0415066	1	Rps18	E18_vs_PP	CA1	0.546312
0.151081	-0.129487	1	Gps1	E18_vs_PP	CA1	0.546312
0.151206	0.000566554	1	Sdf2	E18_vs_PP	CA1	0.546312
0.151524	0.12059	1	Kat7	E18_vs_PP	CA1	0.546312
0.151588	-0.106704	1	Rgs7	E18_vs_PP	CA1	0.546312
0.151832	0.108514	1	Zer1	E18_vs_PP	CA1	0.546312
0.151852	-0.123394	1	Taf1b	E18_vs_PP	CA1	0.546312
0.151962	-0.0830564	1	Prpsap2	E18_vs_PP	CA1	0.546312
0.151989	0.0407952	1	Vps29	E18_vs_PP	CA1	0.546312
0.152024	-0.0730497	1	Spic	E18_vs_PP	CA1	0.546312
0.152098	0.128152	1	Lrtm2	E18_vs_PP	CA1	0.546312
0.152101	0.0683275	1	Lias	E18_vs_PP	CA1	0.546312
0.152171	-0.109849	1	Maneal	E18_vs_PP	CA1	0.546312
0.152181	0.0827554	1	Pacsin1	E18_vs_PP	CA1	0.546312
0.152421	0.0810756	1	Arfgap1	E18_vs_PP	CA1	0.546312
0.152482	-0.107159	1	Cep83os	E18_vs_PP	CA1	0.546312
0.152485	-0.0232875	1	Spon1	E18_vs_PP	CA1	0.546312
0.152492	0.0381914	1	Syt16	E18_vs_PP	CA1	0.546312
0.152662	-0.00917821	1	Igfbp5	E18_vs_PP	CA1	0.54659
0.152841	0.0925536	1	Ngfrap1	E18_vs_PP	CA1	0.546896
0.153102	-0.0934281	1	Tma16	E18_vs_PP	CA1	0.547498
0.153281	0.145384	1	Sgk1	E18_vs_PP	CA1	0.547711
0.153348	-0.106676	1	Zwint	E18_vs_PP	CA1	0.547711
0.153577	-0.0490294	1	Vps13d	E18_vs_PP	CA1	0.548196
0.153709	0.126076	1	Rap2a	E18_vs_PP	CA1	0.548336
0.154018	-0.0852903	1	Adam9	E18_vs_PP	CA1	0.548989
0.154079	0.0684784	1	Rbfox1	E18_vs_PP	CA1	0.548989
0.154314	0.0975978	1	Swi5	E18_vs_PP	CA1	0.549168
0.154316	-0.125545	1	B3galt2	E18_vs_PP	CA1	0.549168
0.154417	0.102971	1	Bcr	E18_vs_PP	CA1	0.549194
0.154764	-0.0479668	1	Fosl2	E18_vs_PP	CA1	0.550095
0.155059	-0.113787	1	Ccdc25	E18_vs_PP	CA1	0.550812
0.155283	-0.146277	1	Gna13	E18_vs_PP	CA1	0.551273
0.155403	0.0851848	1	Kcna2	E18_vs_PP	CA1	0.551324
0.155689	0.115182	1	Dync1h1	E18_vs_PP	CA1	0.551324
0.155728	-0.0277955	1	Sec63	E18_vs_PP	CA1	0.551324
0.155735	0.111875	1	Amer2	E18_vs_PP	CA1	0.551324
0.15597	0.0496958	1	Wdfy1	E18_vs_PP	CA1	0.551324
0.156058	0.0249282	1	Uxs1	E18_vs_PP	CA1	0.551324
0.156164	-0.0900623	1	Pspc1	E18_vs_PP	CA1	0.551324
0.156221	0.0396016	1	Calm1	E18_vs_PP	CA1	0.551324
0.156256	-0.15441	1	Upf3b	E18_vs_PP	CA1	0.551324
0.156437	0.0960109	1	Brk1	E18_vs_PP	CA1	0.551324
0.156466	-0.0148578	1	Cops4	E18_vs_PP	CA1	0.551324
0.156514	0.100486	1	Tmem14a	E18_vs_PP	CA1	0.551324
0.156516	0.0436457	1	Dcaf5	E18_vs_PP	CA1	0.551324
0.156686	-0.103439	1	Pts	E18_vs_PP	CA1	0.55159
0.156828	0.10029	1	Aak1	E18_vs_PP	CA1	0.551761
0.157308	-0.00648491	1	Tulp3	E18_vs_PP	CA1	0.552776
0.157343	0.0309097	1	Rabgap1l	E18_vs_PP	CA1	0.552776
0.157399	0.100003	1	Dlgap4	E18_vs_PP	CA1	0.552776
0.157529	-0.0311443	1	Dcaf11	E18_vs_PP	CA1	0.552902
0.157828	0.123375	1	Nyap1	E18_vs_PP	CA1	0.553087
0.157973	-0.109809	1	Commd4	E18_vs_PP	CA1	0.553087
0.158064	0.0876047	1	Sdf4	E18_vs_PP	CA1	0.553087
0.158068	0.128187	1	Qdpr	E18_vs_PP	CA1	0.553087
0.158199	-0.166766	1	Arl5b	E18_vs_PP	CA1	0.553087
0.158223	0.14413	1	Ptdss2	E18_vs_PP	CA1	0.553087
0.15824	-0.0400273	1	Ncbp3	E18_vs_PP	CA1	0.553087
0.158748	-0.130373	1	Mcfd2	E18_vs_PP	CA1	0.554339
0.158954	-0.0754483	1	Mef2a	E18_vs_PP	CA1	0.554339
0.158968	-0.0874366	1	Ddost	E18_vs_PP	CA1	0.554339
0.158975	-0.101031	1	Dnaja4	E18_vs_PP	CA1	0.554339
0.159083	0.134737	1	Smim7	E18_vs_PP	CA1	0.554387
0.15944	0.122037	1	Sirpa	E18_vs_PP	CA1	0.555301
0.159631	-0.0826897	1	Zdhhc13	E18_vs_PP	CA1	0.555636
0.159934	-0.0990083	1	Zmynd11	E18_vs_PP	CA1	0.556166
0.160009	0.00438065	1	Dld	E18_vs_PP	CA1	0.556166
0.160067	0.122536	1	Pls3	E18_vs_PP	CA1	0.556166
0.160197	-0.0742158	1	Nek9	E18_vs_PP	CA1	0.556289
0.160871	-0.138645	1	Ubl3	E18_vs_PP	CA1	0.558094
0.160906	-0.107149	1	Zfp384	E18_vs_PP	CA1	0.558094
0.161097	0.0347715	1	Atp6v0e2	E18_vs_PP	CA1	0.558426
0.161688	0.142736	1	Ppp1r9a	E18_vs_PP	CA1	0.560145
0.162015	0.112391	1	Mmgt1	E18_vs_PP	CA1	0.560891
0.162174	-0.108821	1	Fbxl18	E18_vs_PP	CA1	0.560891
0.16219	-0.0454245	1	Arhgef3	E18_vs_PP	CA1	0.560891
0.16231	-0.0349305	1	Sh3gl2	E18_vs_PP	CA1	0.560976
0.162547	-0.129274	1	Pip5k1a	E18_vs_PP	CA1	0.56131
0.162598	0.0895748	1	Efr3a	E18_vs_PP	CA1	0.56131
0.162697	-0.0733645	1	Usp19	E18_vs_PP	CA1	0.561325
0.163169	-0.107694	1	Dbf4	E18_vs_PP	CA1	0.562621
0.163271	-0.0951579	1	Ubald1	E18_vs_PP	CA1	0.562645
0.163395	0.0607815	1	Eif4h	E18_vs_PP	CA1	0.56274
0.163522	0.0261339	1	Car7	E18_vs_PP	CA1	0.562848
0.163712	-0.00830748	1	Traf7	E18_vs_PP	CA1	0.56288
0.163722	-0.0993224	1	Runx1t1	E18_vs_PP	CA1	0.56288
0.164077	0.0818187	1	Nrxn1	E18_vs_PP	CA1	0.563133
0.164178	-0.107634	1	Ptpro	E18_vs_PP	CA1	0.563133
0.164309	-0.0491722	1	Neto1	E18_vs_PP	CA1	0.563133
0.164347	0.097616	1	Lemd3	E18_vs_PP	CA1	0.563133
0.164475	0.0687077	1	Phb2	E18_vs_PP	CA1	0.563133
0.164475	-0.068835	1	Tatdn3	E18_vs_PP	CA1	0.563133
0.16468	0.150451	1	Pbx1	E18_vs_PP	CA1	0.563133
0.164917	0.0975744	1	Mrpl42	E18_vs_PP	CA1	0.563133
0.164947	0.0338878	1	Txn1	E18_vs_PP	CA1	0.563133
0.165032	-0.0590442	1	Npr2	E18_vs_PP	CA1	0.563133
0.16544	-0.110935	1	Mir99ahg	E18_vs_PP	CA1	0.563133
0.165443	0.0983763	1	Rora	E18_vs_PP	CA1	0.563133
0.165531	-0.0633946	1	Scn8a	E18_vs_PP	CA1	0.563133
0.165552	0.00968903	1	Tecpr1	E18_vs_PP	CA1	0.563133
0.165577	-0.126288	1	Sqle	E18_vs_PP	CA1	0.563133
0.165639	-0.0705088	1	Pld1	E18_vs_PP	CA1	0.563133
0.165645	-0.110949	1	Csmd3	E18_vs_PP	CA1	0.563133
0.165782	-0.115086	1	Ep400	E18_vs_PP	CA1	0.563133
0.165784	0.0307566	1	Zdhhc2	E18_vs_PP	CA1	0.563133
0.166047	-0.0681249	1	Pcdhb22	E18_vs_PP	CA1	0.563133
0.166148	-0.114206	1	Mpc1	E18_vs_PP	CA1	0.563133
0.166253	0.088389	1	Serinc1	E18_vs_PP	CA1	0.563133
0.166321	0.0379302	1	Cdk5r1	E18_vs_PP	CA1	0.563133
0.166344	0.00452512	1	Trappc4	E18_vs_PP	CA1	0.563133
0.166364	-0.0159625	1	Arl5a	E18_vs_PP	CA1	0.563133
0.16643	-0.10934	1	Tmlhe	E18_vs_PP	CA1	0.563133
0.166503	0.124322	1	Eif5	E18_vs_PP	CA1	0.563133
0.166564	-0.0837097	1	Slc16a2	E18_vs_PP	CA1	0.563133
0.166574	-0.0738938	1	Fgf13	E18_vs_PP	CA1	0.563133
0.166924	-0.105457	1	Irak1bp1	E18_vs_PP	CA1	0.563992
0.167125	0.0302547	1	Rbm17	E18_vs_PP	CA1	0.56414
0.167189	-0.132239	1	Cebpg	E18_vs_PP	CA1	0.56414
0.167342	0.102673	1	Rasgrf1	E18_vs_PP	CA1	0.56414
0.167399	0.0785357	1	Brd2	E18_vs_PP	CA1	0.56414
0.167569	-0.117674	1	Rbm18	E18_vs_PP	CA1	0.56414
0.167579	0.0494395	1	D6Wsu163e	E18_vs_PP	CA1	0.56414
0.167734	-0.117755	1	Senp7	E18_vs_PP	CA1	0.56414
0.167735	-0.147037	1	Golim4	E18_vs_PP	CA1	0.56414
0.16837	-0.0623528	1	Ube2e3	E18_vs_PP	CA1	0.565849
0.168494	-0.031242	1	Slc25a42	E18_vs_PP	CA1	0.565849
0.168532	-0.032384	1	Srpk1	E18_vs_PP	CA1	0.565849
0.168731	0.00948905	1	Calm2	E18_vs_PP	CA1	0.566194
0.169288	-0.136988	1	Nolc1	E18_vs_PP	CA1	0.56759
0.169341	0.111792	1	Rpl4	E18_vs_PP	CA1	0.56759
0.169573	-0.0384932	1	Cpd	E18_vs_PP	CA1	0.567616
0.169594	-0.0947284	1	Wdr75	E18_vs_PP	CA1	0.567616
0.169638	-0.0881649	1	Ufsp2	E18_vs_PP	CA1	0.567616
0.169842	0.131902	1	Creld1	E18_vs_PP	CA1	0.567975
0.170292	0.109917	1	Rpl31	E18_vs_PP	CA1	0.568984
0.170416	-0.1297	1	Dzank1	E18_vs_PP	CA1	0.568984
0.170459	-0.123452	1	Ubr7	E18_vs_PP	CA1	0.568984
0.170536	-0.0538616	1	Fubp3	E18_vs_PP	CA1	0.568984
0.170627	-0.0586428	1	Kcnc1	E18_vs_PP	CA1	0.568984
0.171226	0.110414	1	Ncan	E18_vs_PP	CA1	0.570657
0.171623	0.106316	1	6030419C18Rik	E18_vs_PP	CA1	0.570694
0.171691	0.0820123	1	Zfp655	E18_vs_PP	CA1	0.570694
0.171739	0.126623	1	Lrrc14b	E18_vs_PP	CA1	0.570694
0.171759	0.0948705	1	Rpl6	E18_vs_PP	CA1	0.570694
0.171791	0.126464	1	Atp5g3	E18_vs_PP	CA1	0.570694
0.171847	-0.163462	1	Ak4	E18_vs_PP	CA1	0.570694
0.171917	-0.00603829	1	Paqr3	E18_vs_PP	CA1	0.570694
0.17305	0.11457	1	Atp5k	E18_vs_PP	CA1	0.573427
0.173082	0.0343939	1	Actg1	E18_vs_PP	CA1	0.573427
0.173115	-0.0773864	1	N4bp2l1	E18_vs_PP	CA1	0.573427
0.173224	-0.0307593	1	Rnf126	E18_vs_PP	CA1	0.573427
0.173228	-0.127931	1	9330182L06Rik	E18_vs_PP	CA1	0.573427
0.173492	-0.0337136	1	Agfg2	E18_vs_PP	CA1	0.573598
0.173578	-0.0645921	1	Pi4ka	E18_vs_PP	CA1	0.573598
0.173749	-0.0794996	1	Skil	E18_vs_PP	CA1	0.573598
0.173764	-0.0931062	1	Ttc8	E18_vs_PP	CA1	0.573598
0.173775	-0.0855375	1	Slc22a17	E18_vs_PP	CA1	0.573598
0.17394	-0.0484878	1	Hadhb	E18_vs_PP	CA1	0.573598
0.174053	0.0378801	1	Ubxn7	E18_vs_PP	CA1	0.573598
0.174086	-0.0981429	1	Hsf2	E18_vs_PP	CA1	0.573598
0.174158	0.123492	1	Eef1e1	E18_vs_PP	CA1	0.573598
0.174509	0.106076	1	Rps28	E18_vs_PP	CA1	0.574065
0.174561	0.106839	1	Gpr162	E18_vs_PP	CA1	0.574065
0.174627	-0.0909853	1	Ltk	E18_vs_PP	CA1	0.574065
0.174809	-0.00494677	1	Edrf1	E18_vs_PP	CA1	0.574065
0.174832	0.132373	1	Cxxc5	E18_vs_PP	CA1	0.574065
0.174885	-0.106479	1	Amph	E18_vs_PP	CA1	0.574065
0.175308	-0.0759555	1	Dennd5a	E18_vs_PP	CA1	0.57493
0.175428	0.0989258	1	Mapt	E18_vs_PP	CA1	0.57493
0.175633	-0.0518148	1	Slc6a17	E18_vs_PP	CA1	0.57493
0.175747	0.0686141	1	Mrps23	E18_vs_PP	CA1	0.57493
0.175752	-0.0945197	1	Fam162a	E18_vs_PP	CA1	0.57493
0.175839	0.0259994	1	Col4a3bp	E18_vs_PP	CA1	0.57493
0.176015	-0.10133	1	Lingo2	E18_vs_PP	CA1	0.57493
0.176125	0.0247362	1	Rbl2	E18_vs_PP	CA1	0.57493
0.176147	0.146672	1	Tle4	E18_vs_PP	CA1	0.57493
0.176414	-0.127453	1	Rnf4	E18_vs_PP	CA1	0.57493
0.176429	-0.0936949	1	Abcd4	E18_vs_PP	CA1	0.57493
0.176439	-0.130977	1	Rsbn1	E18_vs_PP	CA1	0.57493
0.176527	0.0993491	1	Msantd4	E18_vs_PP	CA1	0.57493
0.176563	0.140021	1	Scn2b	E18_vs_PP	CA1	0.57493
0.176616	-0.0465903	1	Lrpprc	E18_vs_PP	CA1	0.57493
0.176934	-0.127554	1	Nr4a1	E18_vs_PP	CA1	0.575229
0.177153	-0.109562	1	Slf1	E18_vs_PP	CA1	0.575229
0.177182	-0.185196	1	Cfap36	E18_vs_PP	CA1	0.575229
0.177215	-0.0184853	1	Usp10	E18_vs_PP	CA1	0.575229
0.17731	-0.0573317	1	2610044O15Rik8	E18_vs_PP	CA1	0.575229
0.177373	-0.0883492	1	Iscu	E18_vs_PP	CA1	0.575229
0.177393	-0.114009	1	Bscl2	E18_vs_PP	CA1	0.575229
0.177689	0.143867	1	Ttc17	E18_vs_PP	CA1	0.575874
0.17779	-0.121074	1	Kcnma1	E18_vs_PP	CA1	0.575884
0.177892	-0.0969685	1	Ptprz1	E18_vs_PP	CA1	0.575897
0.178228	0.0636695	1	Nsg1	E18_vs_PP	CA1	0.576474
0.178267	0.115508	1	Magi1	E18_vs_PP	CA1	0.576474
0.178433	-0.104458	1	Pan3	E18_vs_PP	CA1	0.576694
0.178927	0.0843838	1	Slc48a1	E18_vs_PP	CA1	0.577973
0.179056	-0.0932948	1	Ncam1	E18_vs_PP	CA1	0.578073
0.179253	-0.149233	1	Casd1	E18_vs_PP	CA1	0.578392
0.179445	-0.101545	1	Slc25a44	E18_vs_PP	CA1	0.578587
0.179737	0.0118098	1	Kbtbd2	E18_vs_PP	CA1	0.578587
0.179886	0.115094	1	Cdc42se2	E18_vs_PP	CA1	0.578587
0.17992	-0.0440956	1	Tmem130	E18_vs_PP	CA1	0.578587
0.179956	-0.083945	1	Nt5c3	E18_vs_PP	CA1	0.578587
0.179987	0.0611312	1	Ext1	E18_vs_PP	CA1	0.578587
0.180073	0.0102665	1	Aggf1	E18_vs_PP	CA1	0.578587
0.180168	0.0746136	1	Ubn1	E18_vs_PP	CA1	0.578587
0.180199	-0.0893607	1	Pfkfb2	E18_vs_PP	CA1	0.578587
0.180447	-0.028277	1	Susd6	E18_vs_PP	CA1	0.578728
0.180503	-0.0221169	1	Mtm1	E18_vs_PP	CA1	0.578728
0.180762	-0.110707	1	Fdxacb1	E18_vs_PP	CA1	0.578728
0.180836	-0.066588	1	Tmem127	E18_vs_PP	CA1	0.578728
0.180897	0.0967426	1	Dlg4	E18_vs_PP	CA1	0.578728
0.180936	0.119435	1	Ift20	E18_vs_PP	CA1	0.578728
0.181025	-0.0712882	1	Adra2c	E18_vs_PP	CA1	0.578728
0.181031	0.0856912	1	Scn1b	E18_vs_PP	CA1	0.578728
0.181227	-0.0872141	1	Fam199x	E18_vs_PP	CA1	0.578903
0.181283	-0.00451574	1	Braf	E18_vs_PP	CA1	0.578903
0.18152	-0.0656707	1	Minpp1	E18_vs_PP	CA1	0.579061
0.181529	0.0303911	1	Pttg1ip	E18_vs_PP	CA1	0.579061
0.181726	0.102923	1	Slc25a4	E18_vs_PP	CA1	0.579374
0.182024	0.0152257	1	Smarca2	E18_vs_PP	CA1	0.579738
0.182037	-0.108368	1	Tspyl2	E18_vs_PP	CA1	0.579738
0.182137	0.137096	1	Tnpo2	E18_vs_PP	CA1	0.579743
0.182516	-0.100395	1	Lekr1	E18_vs_PP	CA1	0.580401
0.182541	0.075966	1	Elmod1	E18_vs_PP	CA1	0.580401
0.182714	0.132147	1	Nt5dc3	E18_vs_PP	CA1	0.580637
0.183375	0.00922272	1	Apoe	E18_vs_PP	CA1	0.582352
0.183571	0.0872408	1	Gm561	E18_vs_PP	CA1	0.582352
0.183598	0.0968696	1	Agpat3	E18_vs_PP	CA1	0.582352
0.183815	-0.0599011	1	Bdp1	E18_vs_PP	CA1	0.582352
0.183844	-0.0820189	1	Rnf181	E18_vs_PP	CA1	0.582352
0.183865	-0.1249	1	Trmt1l	E18_vs_PP	CA1	0.582352
0.183994	0.0796607	1	Eid2	E18_vs_PP	CA1	0.582352
0.184066	-0.150915	1	Stox2	E18_vs_PP	CA1	0.582352
0.184146	0.0431462	1	Tprgl	E18_vs_PP	CA1	0.582352
0.184321	-0.0965409	1	Rcc2	E18_vs_PP	CA1	0.582359
0.184346	-0.0929756	1	Snx14	E18_vs_PP	CA1	0.582359
0.184558	0.125063	1	Mzt1	E18_vs_PP	CA1	0.582716
0.184697	-0.0800768	1	Nov	E18_vs_PP	CA1	0.582842
0.184849	0.102846	1	Btf3l4	E18_vs_PP	CA1	0.582978
0.184939	-0.126536	1	Nr2f2	E18_vs_PP	CA1	0.582978
0.185196	0.118565	1	Kbtbd11	E18_vs_PP	CA1	0.583034
0.185447	-0.0775022	1	Zfand3	E18_vs_PP	CA1	0.583034
0.185533	-0.126754	1	Arl6	E18_vs_PP	CA1	0.583034
0.185547	-0.117283	1	Kdm1a	E18_vs_PP	CA1	0.583034
0.18568	0.12662	1	Pde4b	E18_vs_PP	CA1	0.583034
0.185727	-0.128411	1	Zfp386	E18_vs_PP	CA1	0.583034
0.185765	-0.0507826	1	Gabpb2	E18_vs_PP	CA1	0.583034
0.185847	0.108931	1	1700025G04Rik	E18_vs_PP	CA1	0.583034
0.185963	0.0761351	1	Nol4	E18_vs_PP	CA1	0.583034
0.186032	0.147027	1	Pik3ca	E18_vs_PP	CA1	0.583034
0.186047	-0.0998078	1	Tpm1	E18_vs_PP	CA1	0.583034
0.186154	-0.000575897	1	Ing4	E18_vs_PP	CA1	0.583058
0.186463	-0.0677802	1	Slc8a2	E18_vs_PP	CA1	0.583169
0.186724	0.115554	1	Asb8	E18_vs_PP	CA1	0.583169
0.186765	0.103852	1	Rab7	E18_vs_PP	CA1	0.583169
0.186841	0.10367	1	Ndufs3	E18_vs_PP	CA1	0.583169
0.187026	-0.081032	1	Cdkn2d	E18_vs_PP	CA1	0.583169
0.187142	-0.126872	1	Wipi2	E18_vs_PP	CA1	0.583169
0.187174	-0.0970506	1	Fpgt	E18_vs_PP	CA1	0.583169
0.187205	0.100425	1	Efna3	E18_vs_PP	CA1	0.583169
0.18725	0.0971588	1	Pde8b	E18_vs_PP	CA1	0.583169
0.187253	-0.0823298	1	Lrba	E18_vs_PP	CA1	0.583169
0.187347	-0.119761	1	Rrnad1	E18_vs_PP	CA1	0.583169
0.18738	0.0479863	1	Ldha	E18_vs_PP	CA1	0.583169
0.187549	-0.0942894	1	Ube2e2	E18_vs_PP	CA1	0.583386
0.187777	0.0398742	1	Gucy1b3	E18_vs_PP	CA1	0.583428
0.187848	0.117372	1	2610507B11Rik	E18_vs_PP	CA1	0.583428
0.18786	-0.109808	1	Caly	E18_vs_PP	CA1	0.583428
0.188154	-0.11349	1	Stard3nl	E18_vs_PP	CA1	0.584034
0.188322	-0.0288301	1	Wdr48	E18_vs_PP	CA1	0.584141
0.188443	-0.0961566	1	Trmt6	E18_vs_PP	CA1	0.584141
0.188552	0.0523536	1	Sdha	E18_vs_PP	CA1	0.584141
0.188586	-0.122291	1	D5Ertd579e	E18_vs_PP	CA1	0.584141
0.188691	-0.0909924	1	Dtymk	E18_vs_PP	CA1	0.584156
0.1888	0.108713	1	Ptma	E18_vs_PP	CA1	0.584188
0.188949	-0.0399334	1	Atp6v1f	E18_vs_PP	CA1	0.584339
0.18936	-0.0388637	1	Cldn12	E18_vs_PP	CA1	0.584866
0.189404	0.0428076	1	Akirin2	E18_vs_PP	CA1	0.584866
0.189417	0.0715628	1	Stk25	E18_vs_PP	CA1	0.584866
0.189527	-0.106093	1	Efnb3	E18_vs_PP	CA1	0.584898
0.189734	0.127727	1	Ide	E18_vs_PP	CA1	0.585229
0.189958	-0.0670949	1	Fbxo28	E18_vs_PP	CA1	0.585612
0.190732	-0.101399	1	Nnt	E18_vs_PP	CA1	0.587689
0.19095	0.111572	1	Gm14391	E18_vs_PP	CA1	0.587712
0.191113	-0.104919	1	Rcn2	E18_vs_PP	CA1	0.587712
0.191579	0.115456	1	2210016L21Rik	E18_vs_PP	CA1	0.587712
0.191621	0.0869042	1	Uqcrc1	E18_vs_PP	CA1	0.587712
0.191685	-0.059322	1	Sdccag8	E18_vs_PP	CA1	0.587712
0.19174	0.111074	1	Dnmt3a	E18_vs_PP	CA1	0.587712
0.191747	-0.0564522	1	Psmb2	E18_vs_PP	CA1	0.587712
0.191802	0.144242	1	Fnip1	E18_vs_PP	CA1	0.587712
0.191809	-0.107659	1	6330403K07Rik	E18_vs_PP	CA1	0.587712
0.191812	0.10009	1	Atf7ip	E18_vs_PP	CA1	0.587712
0.191909	-0.085031	1	Mto1	E18_vs_PP	CA1	0.587712
0.191939	0.114999	1	Gpcpd1	E18_vs_PP	CA1	0.587712
0.192045	-0.0721412	1	Eif2ak1	E18_vs_PP	CA1	0.587732
0.192312	-0.0627124	1	Adarb1	E18_vs_PP	CA1	0.588011
0.192336	0.0355209	1	Ndnl2	E18_vs_PP	CA1	0.588011
0.192752	0.0610713	1	Coq10b	E18_vs_PP	CA1	0.58889
0.192828	-0.120446	1	Cct7	E18_vs_PP	CA1	0.58889
0.192924	0.033305	1	Clptm1	E18_vs_PP	CA1	0.58889
0.193176	0.140467	1	Omg	E18_vs_PP	CA1	0.589322
0.193266	0.0926195	1	Miat	E18_vs_PP	CA1	0.589322
0.193779	-0.0941901	1	Oat	E18_vs_PP	CA1	0.590493
0.193997	0.110637	1	Pip5k1c	E18_vs_PP	CA1	0.590493
0.194037	-0.110298	1	Pphln1	E18_vs_PP	CA1	0.590493
0.194126	-0.135339	1	Gpr26	E18_vs_PP	CA1	0.590493
0.194152	-0.0187673	1	Slc4a10	E18_vs_PP	CA1	0.590493
0.194273	0.0133754	1	Sept5	E18_vs_PP	CA1	0.590554
0.194414	-0.109348	1	Gm17066	E18_vs_PP	CA1	0.590678
0.194823	-0.0521015	1	Ncoa1	E18_vs_PP	CA1	0.591342
0.195089	0.0451259	1	Sap18	E18_vs_PP	CA1	0.591342
0.195157	0.00252927	1	Ifrd1	E18_vs_PP	CA1	0.591342
0.195269	0.105215	1	Orc6	E18_vs_PP	CA1	0.591342
0.19533	-0.0893879	1	Nat14	E18_vs_PP	CA1	0.591342
0.195451	0.0019278	1	Tmem9b	E18_vs_PP	CA1	0.591342
0.195539	0.0834768	1	Zdhhc8	E18_vs_PP	CA1	0.591342
0.195713	-0.112566	1	Adrbk2	E18_vs_PP	CA1	0.591342
0.195796	-0.0550355	1	Serbp1	E18_vs_PP	CA1	0.591342
0.195981	-0.0855921	1	Ephb2	E18_vs_PP	CA1	0.591342
0.196017	-0.0326676	1	1500011K16Rik	E18_vs_PP	CA1	0.591342
0.196026	-0.104482	1	Abcc5	E18_vs_PP	CA1	0.591342
0.196028	-0.110702	1	Sec24d	E18_vs_PP	CA1	0.591342
0.196072	-0.130091	1	Pkp4	E18_vs_PP	CA1	0.591342
0.196142	-0.018088	1	Dap3	E18_vs_PP	CA1	0.591342
0.196593	0.0661395	1	2410002F23Rik	E18_vs_PP	CA1	0.592398
0.196895	-0.0385845	1	U2af2	E18_vs_PP	CA1	0.592938
0.196974	-0.114725	1	Slitrk5	E18_vs_PP	CA1	0.592938
0.197077	0.0502598	1	Tnfrsf21	E18_vs_PP	CA1	0.592946
0.197678	-0.108396	1	Otud4	E18_vs_PP	CA1	0.593731
0.197688	-0.122012	1	Stoml1	E18_vs_PP	CA1	0.593731
0.197849	0.0917166	1	Trim8	E18_vs_PP	CA1	0.593731
0.197858	0.137629	1	Plppr5	E18_vs_PP	CA1	0.593731
0.197931	-0.00282237	1	Macrod2	E18_vs_PP	CA1	0.593731
0.198016	0.076787	1	Stard7	E18_vs_PP	CA1	0.593731
0.198065	-0.0895107	1	Ubr1	E18_vs_PP	CA1	0.593731
0.19829	-0.0504583	1	Cfap74	E18_vs_PP	CA1	0.593731
0.198332	0.100889	1	Fam212b	E18_vs_PP	CA1	0.593731
0.198348	-0.0924327	1	Polr3gl	E18_vs_PP	CA1	0.593731
0.198464	0.0397927	1	Paox	E18_vs_PP	CA1	0.593775
0.198621	0.0932949	1	Atxn7l3	E18_vs_PP	CA1	0.593942
0.198793	0.0284672	1	Clk3	E18_vs_PP	CA1	0.594156
0.19923	0.0889771	1	Akt3	E18_vs_PP	CA1	0.594638
0.199273	-0.0920931	1	Nrd1	E18_vs_PP	CA1	0.594638
0.199296	0.155939	1	Rabgap1	E18_vs_PP	CA1	0.594638
0.199359	-0.0950433	1	Zfp532	E18_vs_PP	CA1	0.594638
0.199489	0.0916431	1	Mis18bp1	E18_vs_PP	CA1	0.594724
0.199755	0.125362	1	Acbd3	E18_vs_PP	CA1	0.595214
0.200006	-0.128766	1	Map6	E18_vs_PP	CA1	0.5956
0.200113	-0.0302549	1	Sec24c	E18_vs_PP	CA1	0.5956
0.200286	-0.0882024	1	Ctxn1	E18_vs_PP	CA1	0.5956
0.200649	-0.0335729	1	Tspan15	E18_vs_PP	CA1	0.5956
0.200774	0.0393958	1	Pef1	E18_vs_PP	CA1	0.5956
0.200798	0.123859	1	Pdxdc1	E18_vs_PP	CA1	0.5956
0.20092	0.101777	1	Mfap1a	E18_vs_PP	CA1	0.5956
0.200927	0.0912712	1	Serp2	E18_vs_PP	CA1	0.5956
0.201026	-0.0895406	1	Mettl7a1	E18_vs_PP	CA1	0.5956
0.201093	0.119297	1	Dr1	E18_vs_PP	CA1	0.5956
0.201128	0.0212578	1	Apc	E18_vs_PP	CA1	0.5956
0.201192	0.0859277	1	Set	E18_vs_PP	CA1	0.5956
0.201201	0.0641955	1	Fasn	E18_vs_PP	CA1	0.5956
0.201484	-0.0696483	1	Gm44904	E18_vs_PP	CA1	0.596138
0.201818	0.0187505	1	Rnf44	E18_vs_PP	CA1	0.596583
0.201919	-0.0295249	1	Phf8	E18_vs_PP	CA1	0.596583
0.201939	-0.10091	1	Rpia	E18_vs_PP	CA1	0.596583
0.20228	0.0917875	1	Casc4	E18_vs_PP	CA1	0.597002
0.202284	-0.116558	1	Eprs	E18_vs_PP	CA1	0.597002
0.202534	0.0618616	1	9530068E07Rik	E18_vs_PP	CA1	0.597439
0.202905	0.089121	1	Ppa1	E18_vs_PP	CA1	0.598233
0.20324	0.0377651	1	Cops2	E18_vs_PP	CA1	0.598728
0.203276	0.0489241	1	H2-T23	E18_vs_PP	CA1	0.598728
0.203609	-0.0611339	1	Nedd4l	E18_vs_PP	CA1	0.598827
0.203613	-0.111073	1	Gemin8	E18_vs_PP	CA1	0.598827
0.203615	-0.0785753	1	Ralgapa1	E18_vs_PP	CA1	0.598827
[truncated: 3,880 more rows]

## Sheet: CA3 VvsE18
p_val	avg_log2FC	p_val_adj	gene	comparison	celltype	fdr
2.14806e-22	-0.86996	5.10163e-18	mt-Atp6	Virgin_vs_E18	CA3	3.54053e-19
9.58686e-07	-0.529141	0.0227688	mt-Cytb	Virgin_vs_E18	CA3	0.000175573
3.25921e-08	-0.527235	0.000774063	mt-Co2	Virgin_vs_E18	CA3	9.76727e-06
5.86417e-13	-0.525253	1.39274e-08	Fth1	Virgin_vs_E18	CA3	6.44374e-10
1.63336e-10	-0.485088	3.87922e-06	Zbtb18	Virgin_vs_E18	CA3	8.97393e-08
1.18492e-05	-0.4758	0.281418	Tnfrsf21	Virgin_vs_E18	CA3	0.00111602
4.46187e-06	-0.469227	0.105969	Bsn	Virgin_vs_E18	CA3	0.000544761
3.23536e-06	-0.463391	0.0768399	mt-Nd1	Virgin_vs_E18	CA3	0.000410207
3.63089e-05	-0.460344	0.862337	AI593442	Virgin_vs_E18	CA3	0.00257403
2.2754e-09	-0.425736	5.40407e-05	Atp6v1a	Virgin_vs_E18	CA3	1.00011e-06
2.83447e-11	-0.423133	6.73186e-07	Ppp3r1	Virgin_vs_E18	CA3	2.07641e-08
1.68834e-06	-0.416393	0.0400981	mt-Nd2	Virgin_vs_E18	CA3	0.000271494
0.000191889	-0.415499	1	Large	Virgin_vs_E18	CA3	0.00870953
5.11256e-05	-0.414957	1	Actr2	Virgin_vs_E18	CA3	0.00324107
0.000204111	-0.405132	1	Dynlt3	Virgin_vs_E18	CA3	0.00908189
1.53737e-05	-0.40233	0.365125	mt-Nd4	Virgin_vs_E18	CA3	0.00129947
0.000205248	-0.401425	1	Fam19a1	Virgin_vs_E18	CA3	0.00908189
6.53125e-05	-0.39948	1	Kif5c	Virgin_vs_E18	CA3	0.00379405
2.92282e-06	-0.393754	0.069417	Pja2	Virgin_vs_E18	CA3	0.000393268
9.65039e-05	-0.387227	1	Cox7c	Virgin_vs_E18	CA3	0.0050496
1.32825e-05	-0.386139	0.31546	March6	Virgin_vs_E18	CA3	0.0011834
0.000168865	-0.373615	1	Nr4a3	Virgin_vs_E18	CA3	0.00778552
5.0104e-05	-0.372145	1	Tspyl1	Virgin_vs_E18	CA3	0.00323859
8.20122e-05	-0.362493	1	Gabra5	Virgin_vs_E18	CA3	0.00454375
7.38568e-08	-0.362052	0.0017541	Chn1	Virgin_vs_E18	CA3	2.02891e-05
1.62842e-06	-0.355092	0.0386749	Enc1	Virgin_vs_E18	CA3	0.000268404
5.60759e-06	-0.354091	0.13318	Rbfox1	Virgin_vs_E18	CA3	0.000631175
0.000228337	-0.35288	1	Tubb2a	Virgin_vs_E18	CA3	0.00971245
6.36806e-05	-0.346174	1	Rasgrp1	Virgin_vs_E18	CA3	0.0037824
2.29392e-06	-0.341132	0.0544806	Ptk2b	Virgin_vs_E18	CA3	0.000336085
8.17746e-05	-0.336345	1	Ywhaz	Virgin_vs_E18	CA3	0.00454375
6.51889e-07	-0.327824	0.0154824	Rsrp1	Virgin_vs_E18	CA3	0.000126409
9.39572e-09	-0.321844	0.000223148	Hpca	Virgin_vs_E18	CA3	3.26032e-06
1.77767e-07	-0.316091	0.00422196	Nsf	Virgin_vs_E18	CA3	4.18577e-05
0.00020902	-0.313671	1	Tspan13	Virgin_vs_E18	CA3	0.00918714
2.46339e-05	-0.313588	0.585054	Pafah1b1	Virgin_vs_E18	CA3	0.00186679
9.62219e-06	-0.300216	0.228527	Map1b	Virgin_vs_E18	CA3	0.000932928
1.77263e-05	-0.298213	0.420999	Nsg2	Virgin_vs_E18	CA3	0.00144723
9.27739e-05	-0.296259	1	Tnik	Virgin_vs_E18	CA3	0.00493273
1.94226e-07	-0.29384	0.00461286	Eef1a1	Virgin_vs_E18	CA3	4.26844e-05
0.000217587	-0.292372	1	Rab2a	Virgin_vs_E18	CA3	0.00931527
1.77803e-05	-0.287076	0.422282	Fkbp1a	Virgin_vs_E18	CA3	0.00144723
5.23806e-06	-0.286934	0.124404	Dlgap1	Virgin_vs_E18	CA3	0.000610753
1.3201e-05	-0.28625	0.313524	Rab6a	Virgin_vs_E18	CA3	0.0011834
5.74044e-07	-0.282573	0.0136335	Actg1	Virgin_vs_E18	CA3	0.000118271
3.55205e-09	-0.273803	8.43612e-05	Syt1	Virgin_vs_E18	CA3	1.46367e-06
1.51357e-08	-0.270508	0.000359472	Calm1	Virgin_vs_E18	CA3	4.75188e-06
7.76433e-05	-0.257818	1	Nckap1	Virgin_vs_E18	CA3	0.00437524
4.82496e-05	-0.255797	1	Tmsb4x	Virgin_vs_E18	CA3	0.00316773
0.000161125	-0.253738	1	Ywhah	Virgin_vs_E18	CA3	0.00753401
1.42417e-05	-0.236682	0.33824	Atp1b1	Virgin_vs_E18	CA3	0.00125194
3.23467e-06	-0.232078	0.0768235	Rtn1	Virgin_vs_E18	CA3	0.000410207
5.83903e-05	-0.206296	1	Ppp3ca	Virgin_vs_E18	CA3	0.00355821
0.000189	-0.193658	1	Mrfap1	Virgin_vs_E18	CA3	0.00865331
0.000200634	-0.15816	1	Calm2	Virgin_vs_E18	CA3	0.0089985
0.000105883	-0.14843	1	Snap25	Virgin_vs_E18	CA3	0.00545381
9.90181e-05	-0.0593682	1	Gm26774	Virgin_vs_E18	CA3	0.00514036
6.33286e-05	0.0674133	1	Alms1	Virgin_vs_E18	CA3	0.0037824
5.37713e-05	0.0885249	1	Mprip	Virgin_vs_E18	CA3	0.00334447
6.44483e-05	0.0987093	1	Meg3	Virgin_vs_E18	CA3	0.00379382
0.000150906	0.166981	1	Nmt2	Virgin_vs_E18	CA3	0.00710659
3.59461e-05	0.171074	0.853719	Lyst	Virgin_vs_E18	CA3	0.00257403
4.37163e-05	0.182777	1	Fgd4	Virgin_vs_E18	CA3	0.00291133
8.56034e-06	0.193083	0.203308	Gm4117	Virgin_vs_E18	CA3	0.000855126
3.40154e-07	0.205633	0.00807867	Tma16	Virgin_vs_E18	CA3	7.23432e-05
2.63649e-06	0.207893	0.0626167	Mme	Virgin_vs_E18	CA3	0.000374989
4.30314e-08	0.209733	0.001022	Snhg11	Virgin_vs_E18	CA3	1.2335e-05
1.82281e-05	0.215143	0.432917	Ccnt2	Virgin_vs_E18	CA3	0.00146558
0.000128191	0.231441	1	Chka	Virgin_vs_E18	CA3	0.00635461
0.000135046	0.24268	1	Ssh2	Virgin_vs_E18	CA3	0.00649895
9.13537e-05	0.24975	1	Nvl	Virgin_vs_E18	CA3	0.00493273
6.07572e-06	0.261987	0.144298	9930111J21Rik2	Virgin_vs_E18	CA3	0.000667621
3.06818e-05	0.26313	0.728692	Rc3h2	Virgin_vs_E18	CA3	0.00227286
1.8737e-07	0.263548	0.00445004	Gm7609	Virgin_vs_E18	CA3	4.25977e-05
0.000134751	0.271704	1	Prex2	Virgin_vs_E18	CA3	0.00649895
9.36481e-05	0.273312	1	Snhg14	Virgin_vs_E18	CA3	0.00493938
6.69834e-05	0.278741	1	Golga3	Virgin_vs_E18	CA3	0.00384019
4.24326e-05	0.28021	1	Sfswap	Virgin_vs_E18	CA3	0.00285467
0.000149805	0.284627	1	Schip1	Virgin_vs_E18	CA3	0.0071055
3.98785e-13	0.288999	9.47115e-09	H2-Q4	Virgin_vs_E18	CA3	5.25838e-10
0.00019287	0.293294	1	Bfar	Virgin_vs_E18	CA3	0.00870953
5.16639e-10	0.294223	1.22702e-05	Nkain3	Virgin_vs_E18	CA3	2.62015e-07
1.20371e-05	0.294548	0.28588	Gm42669	Virgin_vs_E18	CA3	0.00111775
6.23084e-07	0.298707	0.0147982	Chd1	Virgin_vs_E18	CA3	0.000124485
0.000133306	0.302859	1	Rnf165	Virgin_vs_E18	CA3	0.00649895
0.000162313	0.304249	1	Nr2f1	Virgin_vs_E18	CA3	0.00753611
5.54644e-05	0.306545	1	Slc23a1	Virgin_vs_E18	CA3	0.00341754
3.71342e-05	0.307306	0.881938	Fubp1	Virgin_vs_E18	CA3	0.00260453
6.56031e-05	0.308682	1	Pkib	Virgin_vs_E18	CA3	0.00379405
0.000120002	0.309438	1	Psma1	Virgin_vs_E18	CA3	0.00603947
0.000143391	0.309918	1	2810403D21Rik	Virgin_vs_E18	CA3	0.00685056
8.55117e-05	0.311799	1	Arl16	Virgin_vs_E18	CA3	0.00465933
4.23401e-05	0.31195	1	Slc38a9	Virgin_vs_E18	CA3	0.00285467
0.000214584	0.314922	1	Prlr	Virgin_vs_E18	CA3	0.00927537
5.07906e-05	0.315848	1	Atp5g1	Virgin_vs_E18	CA3	0.00324107
1.93256e-05	0.316505	0.458982	Noct	Virgin_vs_E18	CA3	0.00152242
4.31506e-06	0.320871	0.102483	Wdr31	Virgin_vs_E18	CA3	0.000536777
4.08756e-05	0.322221	0.970794	1700017D01Rik	Virgin_vs_E18	CA3	0.00280721
7.29942e-06	0.323219	0.173361	Unc13d	Virgin_vs_E18	CA3	0.000751954
0.000131816	0.323954	1	Slc22a15	Virgin_vs_E18	CA3	0.00648554
1.05891e-05	0.324065	0.25149	Clock	Virgin_vs_E18	CA3	0.00101179
2.23665e-06	0.329816	0.0531205	Igf2	Virgin_vs_E18	CA3	0.000335142
2.00636e-06	0.331588	0.047651	Pdgfrl	Virgin_vs_E18	CA3	0.000307626
4.01716e-05	0.334733	0.954077	Als2	Virgin_vs_E18	CA3	0.00278791
0.000119359	0.335738	1	Prdm5	Virgin_vs_E18	CA3	0.00603947
0.000215248	0.34184	1	Steap2	Virgin_vs_E18	CA3	0.00927537
2.22971e-05	0.344576	0.529557	Ptgds	Virgin_vs_E18	CA3	0.00170936
0.000127673	0.347237	1	Sipa1l3	Virgin_vs_E18	CA3	0.00635461
2.08398e-05	0.34751	0.494945	Cep63	Virgin_vs_E18	CA3	0.00161643
1.37661e-08	0.359841	0.000326945	Lin54	Virgin_vs_E18	CA3	4.538e-06
1.22941e-05	0.361624	0.291986	Rhox8	Virgin_vs_E18	CA3	0.00112577
9.25645e-05	0.367508	1	Ergic2	Virgin_vs_E18	CA3	0.00493273
3.56995e-05	0.368593	0.847863	Ercc4	Virgin_vs_E18	CA3	0.00257403
0.000213636	0.370469	1	Zbtb20	Virgin_vs_E18	CA3	0.00927537
8.32858e-07	0.373575	0.0197804	Anapc7	Virgin_vs_E18	CA3	0.000156887
1.93968e-05	0.380867	0.460675	A830008E24Rik	Virgin_vs_E18	CA3	0.00152242
2.91089e-06	0.383292	0.0691336	Apoe	Virgin_vs_E18	CA3	0.000393268
3.21728e-06	0.384375	0.0764105	Hbb-bs	Virgin_vs_E18	CA3	0.000410207
6.50281e-06	0.387598	0.154442	Tulp3	Virgin_vs_E18	CA3	0.000702837
2.69158e-05	0.388664	0.63925	Tfdp2	Virgin_vs_E18	CA3	0.00201654
8.07552e-06	0.390511	0.191794	AU022252	Virgin_vs_E18	CA3	0.000819106
5.64831e-06	0.394111	0.134147	BC051077	Virgin_vs_E18	CA3	0.000631175
7.03541e-05	0.39496	1	Stxbp2	Virgin_vs_E18	CA3	0.00399866
4.89723e-09	0.397787	0.000116309	Ttf1	Virgin_vs_E18	CA3	1.89926e-06
5.11211e-06	0.401754	0.121413	Mfsd11	Virgin_vs_E18	CA3	0.000610753
8.53687e-05	0.406591	1	9530059O14Rik	Virgin_vs_E18	CA3	0.00465933
1.45238e-05	0.408539	0.34494	Trim12c	Virgin_vs_E18	CA3	0.00125994
4.85274e-05	0.408891	1	Aldoc	Virgin_vs_E18	CA3	0.00316773
1.51326e-05	0.41112	0.359399	P3h3	Virgin_vs_E18	CA3	0.0012957
1.38783e-06	0.416088	0.0329609	Soat2	Virgin_vs_E18	CA3	0.000234614
0.000119814	0.416823	1	Cst3	Virgin_vs_E18	CA3	0.00603947
5.88268e-05	0.41738	1	Hpgds	Virgin_vs_E18	CA3	0.00355821
1.5783e-05	0.419827	0.374847	Tmod3	Virgin_vs_E18	CA3	0.00131718
3.53603e-05	0.424273	0.839808	Rbm8a	Virgin_vs_E18	CA3	0.00257403
1.94749e-06	0.428698	0.0462529	Amn1	Virgin_vs_E18	CA3	0.000305709
8.38135e-09	0.440561	0.000199057	Rmi2	Virgin_vs_E18	CA3	3.0699e-06
1.36205e-06	0.454413	0.0323486	Synrg	Virgin_vs_E18	CA3	0.000234614
5.21251e-05	0.459352	1	Park2	Virgin_vs_E18	CA3	0.00327296
3.38955e-11	0.459502	8.05019e-07	Mir124a-1hg	Virgin_vs_E18	CA3	2.23473e-08
6.73389e-06	0.461754	0.15993	Gm26737	Virgin_vs_E18	CA3	0.000716073
5.28029e-06	0.4672	0.125407	Grin2b	Virgin_vs_E18	CA3	0.000610753
9.01143e-08	0.490244	0.00214022	Samhd1	Virgin_vs_E18	CA3	2.20046e-05
2.67321e-06	0.491141	0.0634887	Pphln1	Virgin_vs_E18	CA3	0.000374989
8.6014e-08	0.531936	0.00204283	Mid1	Virgin_vs_E18	CA3	2.19562e-05
9.47234e-06	0.541729	0.224968	Dhx33	Virgin_vs_E18	CA3	0.000932106
6.99354e-06	0.54475	0.166097	Slirp	Virgin_vs_E18	CA3	0.00073188
1.02774e-06	0.547087	0.0244088	Pycr2	Virgin_vs_E18	CA3	0.000183132
6.98202e-12	0.547301	1.65823e-07	Ccdc62	Virgin_vs_E18	CA3	5.75406e-09
5.36549e-12	0.549857	1.2743e-07	Phkg1	Virgin_vs_E18	CA3	5.05352e-09
8.65861e-08	0.565791	0.00205642	2500004C02Rik	Virgin_vs_E18	CA3	2.19562e-05
6.23271e-10	0.575108	1.48027e-05	Bckdk	Virgin_vs_E18	CA3	2.93516e-07
4.39252e-11	0.583947	1.04322e-06	Itch	Virgin_vs_E18	CA3	2.63271e-08
8.04056e-24	1.02217	1.90963e-19	Kl	Virgin_vs_E18	CA3	1.76705e-20
1.18065e-66	1.87192	2.80404e-62	Enpp2	Virgin_vs_E18	CA3	3.892e-63
1.8129e-150	2.87147	4.30563e-146	Ttr	Virgin_vs_E18	CA3	1.19524e-146
0.000260557	0.104698	1	Gm10660	Virgin_vs_E18	CA3	0.0110119
0.000262694	0.13149	1	Dbf4	Virgin_vs_E18	CA3	0.0110315
0.000278338	0.27099	1	Zfp329	Virgin_vs_E18	CA3	0.0116144
0.000287226	0.0824906	1	Mms19	Virgin_vs_E18	CA3	0.0118629
0.000289051	0.363919	1	D3Ertd254e	Virgin_vs_E18	CA3	0.0118629
0.000289691	0.216078	1	Lrrc14b	Virgin_vs_E18	CA3	0.0118629
0.000292009	0.291418	1	Galnt18	Virgin_vs_E18	CA3	0.0118841
0.000300153	-0.415928	1	Rpl37a	Virgin_vs_E18	CA3	0.0120926
0.000300803	0.35476	1	Gm21750	Virgin_vs_E18	CA3	0.0120926
0.000310094	0.300111	1	Sag	Virgin_vs_E18	CA3	0.0123906
0.000315007	-0.474192	1	Gm9493	Virgin_vs_E18	CA3	0.0124699
0.000315861	0.339629	1	Bcas2	Virgin_vs_E18	CA3	0.0124699
0.000320156	0.361395	1	Mbp	Virgin_vs_E18	CA3	0.0125642
0.000324167	-0.390383	1	Kctd12	Virgin_vs_E18	CA3	0.0126464
0.000335943	-0.274746	1	mt-Co1	Virgin_vs_E18	CA3	0.0130287
0.000340197	-0.241779	1	Nrn1	Virgin_vs_E18	CA3	0.0131165
0.000342634	0.250905	1	C2cd5	Virgin_vs_E18	CA3	0.0131336
0.00034479	0.307674	1	Socs2	Virgin_vs_E18	CA3	0.0131399
0.000347631	-0.290488	1	Camk2n1	Virgin_vs_E18	CA3	0.0131628
0.000350151	0.263709	1	C2cd3	Virgin_vs_E18	CA3	0.0131628
0.000351381	-0.43841	1	Erc2	Virgin_vs_E18	CA3	0.0131628
0.00037136	-0.289215	1	Mllt11	Virgin_vs_E18	CA3	0.0137837
0.000372136	-0.28705	1	Epha4	Virgin_vs_E18	CA3	0.0137837
0.000375776	0.435055	1	Pwwp2a	Virgin_vs_E18	CA3	0.0138407
0.000434511	0.261057	1	Ttc8	Virgin_vs_E18	CA3	0.0159152
0.000439235	0.29278	1	Sec23b	Virgin_vs_E18	CA3	0.0159993
0.000451044	0.347089	1	Oxsm	Virgin_vs_E18	CA3	0.0163392
0.000454851	0.368192	1	Exosc2	Virgin_vs_E18	CA3	0.0163871
0.00045756	0.227898	1	Tmem234	Virgin_vs_E18	CA3	0.0163951
0.000466979	-0.382839	1	Spop	Virgin_vs_E18	CA3	0.0166421
0.000471589	0.261815	1	Tnfrsf25	Virgin_vs_E18	CA3	0.016716
0.000480471	-0.267007	1	Actb	Virgin_vs_E18	CA3	0.0169148
0.00048441	0.0233423	1	Focad	Virgin_vs_E18	CA3	0.0169148
0.000484891	0.387627	1	Gm21917	Virgin_vs_E18	CA3	0.0169148
0.000497928	0.277426	1	Scly	Virgin_vs_E18	CA3	0.0172781
0.000523255	0.198593	1	Hspa4l	Virgin_vs_E18	CA3	0.0180619
0.000544838	0.226616	1	Trpv2	Virgin_vs_E18	CA3	0.0187089
0.000555577	-0.326377	1	Epn1	Virgin_vs_E18	CA3	0.0189788
0.000563151	0.165415	1	Celf2	Virgin_vs_E18	CA3	0.0191384
0.000576368	0.15501	1	Med23	Virgin_vs_E18	CA3	0.0194275
0.00057755	0.15837	1	Mpv17	Virgin_vs_E18	CA3	0.0194275
0.000590554	-0.225472	1	Ywhab	Virgin_vs_E18	CA3	0.0197641
0.000593876	-0.330903	1	Sub1	Virgin_vs_E18	CA3	0.0197749
0.000618448	0.180655	1	Kdm2b	Virgin_vs_E18	CA3	0.0204896
0.000630877	0.126791	1	Birc6	Virgin_vs_E18	CA3	0.0207969
0.000640281	-0.174733	1	Gpm6a	Virgin_vs_E18	CA3	0.0210019
0.000647855	-0.0640909	1	Arnt	Virgin_vs_E18	CA3	0.0211451
0.000669349	0.382733	1	Slamf1	Virgin_vs_E18	CA3	0.021739
0.000679123	0.262428	1	Nsun7	Virgin_vs_E18	CA3	0.0219298
0.000685679	0.236138	1	Krit1	Virgin_vs_E18	CA3	0.0219298
0.000687523	-0.37092	1	Tcaf1	Virgin_vs_E18	CA3	0.0219298
0.000698366	0.201139	1	D10Wsu102e	Virgin_vs_E18	CA3	0.0219298
0.000698846	0.220424	1	Ctdspl	Virgin_vs_E18	CA3	0.0219298
0.000699262	-0.348452	1	Dctn1	Virgin_vs_E18	CA3	0.0219298
0.000701282	0.422214	1	Mllt4	Virgin_vs_E18	CA3	0.0219298
0.000703644	0.355198	1	Vamp3	Virgin_vs_E18	CA3	0.0219298
0.000705159	-0.363067	1	Rgs7	Virgin_vs_E18	CA3	0.0219298
0.000718601	0.331142	1	Srsf6	Virgin_vs_E18	CA3	0.0221469
0.000721776	0.260181	1	Lzts3	Virgin_vs_E18	CA3	0.0221469
0.000722218	0.201412	1	Swt1	Virgin_vs_E18	CA3	0.0221469
0.000736784	-0.243104	1	Eif4a2	Virgin_vs_E18	CA3	0.022489
0.000749643	0.226871	1	Raph1	Virgin_vs_E18	CA3	0.022776
0.000761123	0.193839	1	Fry	Virgin_vs_E18	CA3	0.0230187
0.000783858	-0.206992	1	Ppp3cb	Virgin_vs_E18	CA3	0.023598
0.000792869	0.136731	1	Gm21897	Virgin_vs_E18	CA3	0.0236278
0.000796615	0.219743	1	Rasl10a	Virgin_vs_E18	CA3	0.0236278
0.000802318	-0.368205	1	Fam103a1	Virgin_vs_E18	CA3	0.0236278
0.000804722	-0.374754	1	Ids	Virgin_vs_E18	CA3	0.0236278
0.000805427	0.314489	1	Gabra2	Virgin_vs_E18	CA3	0.0236278
0.000808014	0.396083	1	Ticrr	Virgin_vs_E18	CA3	0.0236278
0.000809931	0.149522	1	Morc2b	Virgin_vs_E18	CA3	0.0236278
0.000837607	0.317841	1	Ash1l	Virgin_vs_E18	CA3	0.0243275
0.000845901	0.269045	1	Ctf2	Virgin_vs_E18	CA3	0.0243609
0.000846148	-0.324245	1	Ncald	Virgin_vs_E18	CA3	0.0243609
0.00086677	-0.262156	1	Stmn2	Virgin_vs_E18	CA3	0.0248462
0.000877605	-0.423943	1	Ss18l1	Virgin_vs_E18	CA3	0.0250478
0.000882602	0.140302	1	Zfp950	Virgin_vs_E18	CA3	0.0250819
0.000893067	0.264855	1	N4bp2l2	Virgin_vs_E18	CA3	0.0252557
0.00089638	-0.263295	1	Syn1	Virgin_vs_E18	CA3	0.0252557
0.000915649	0.262621	1	Tapbpl	Virgin_vs_E18	CA3	0.0256737
0.000919003	-0.190066	1	Pak1	Virgin_vs_E18	CA3	0.0256737
0.000931199	0.278627	1	Mgll	Virgin_vs_E18	CA3	0.0259046
0.000943417	-0.289677	1	Capza2	Virgin_vs_E18	CA3	0.026038
0.000944547	0.287524	1	Tmem237	Virgin_vs_E18	CA3	0.026038
0.000947842	-0.351942	1	Ndufa4	Virgin_vs_E18	CA3	0.026038
0.000967273	0.186323	1	Kcnc3	Virgin_vs_E18	CA3	0.0264615
0.000978148	0.145068	1	Crlf3	Virgin_vs_E18	CA3	0.0265831
0.000981961	0.282096	1	A430073D23Rik	Virgin_vs_E18	CA3	0.0265831
0.000983814	0.289267	1	Crtc3	Virgin_vs_E18	CA3	0.0265831
0.000990735	-0.325239	1	Mtpn	Virgin_vs_E18	CA3	0.0266609
0.00102611	-0.37274	1	Arpc1a	Virgin_vs_E18	CA3	0.0275007
0.0011086	-0.374089	1	Tuba4a	Virgin_vs_E18	CA3	0.0295912
0.00113608	0.22537	1	Dmxl1	Virgin_vs_E18	CA3	0.0302023
0.00114606	-0.181982	1	Ndrg4	Virgin_vs_E18	CA3	0.0303453
0.0011637	0.330998	1	March7	Virgin_vs_E18	CA3	0.030689
0.00119112	0.16357	1	Dbt	Virgin_vs_E18	CA3	0.0312001
0.00119254	0.22863	1	Gm15879	Virgin_vs_E18	CA3	0.0312001
0.00119736	-0.191466	1	Rtn3	Virgin_vs_E18	CA3	0.0312023
0.00123785	0.279363	1	Was	Virgin_vs_E18	CA3	0.0321306
0.00124772	0.105923	1	Sox12	Virgin_vs_E18	CA3	0.0322596
0.00126023	0.350175	1	Cflar	Virgin_vs_E18	CA3	0.032456
0.00127592	0.198139	1	Ubn2	Virgin_vs_E18	CA3	0.0327321
0.0013112	-0.268591	1	Gabrb3	Virgin_vs_E18	CA3	0.0333765
0.00131583	0.253378	1	Fbxw2	Virgin_vs_E18	CA3	0.0333765
0.00132116	0.182223	1	Etnk1	Virgin_vs_E18	CA3	0.0333765
0.00132129	0.321009	1	Sdccag8	Virgin_vs_E18	CA3	0.0333765
0.00133999	0.110707	1	Nktr	Virgin_vs_E18	CA3	0.0337198
0.00140436	0.355685	1	Ndrg2	Virgin_vs_E18	CA3	0.0351105
0.00140591	-0.323056	1	Rnf14	Virgin_vs_E18	CA3	0.0351105
0.00146814	-0.358699	1	Brinp1	Virgin_vs_E18	CA3	0.0365261
0.00148046	0.345811	1	Fam214a	Virgin_vs_E18	CA3	0.0366942
0.00150415	0.256267	1	Gm21833	Virgin_vs_E18	CA3	0.0370662
0.00150671	-0.233063	1	Plppr4	Virgin_vs_E18	CA3	0.0370662
0.00153586	-0.468142	1	mt-Nd3	Virgin_vs_E18	CA3	0.0376429
0.00154641	-0.301092	1	Gda	Virgin_vs_E18	CA3	0.0377611
0.00155986	0.169275	1	Pus7	Virgin_vs_E18	CA3	0.0379489
0.00158029	0.0501642	1	4632427E13Rik	Virgin_vs_E18	CA3	0.0383046
0.00162166	-0.218868	1	Ywhag	Virgin_vs_E18	CA3	0.0391452
0.00162684	0.458759	1	Tcirg1	Virgin_vs_E18	CA3	0.0391452
0.00165738	0.265752	1	Gm26615	Virgin_vs_E18	CA3	0.039735
0.0017288	0.29589	1	AI480526	Virgin_vs_E18	CA3	0.0412969
0.00175963	0.217665	1	Phc3	Virgin_vs_E18	CA3	0.0418472
0.00176453	0.204289	1	Gin1	Virgin_vs_E18	CA3	0.0418472
0.00177416	0.386104	1	Car2	Virgin_vs_E18	CA3	0.0419248
0.00179953	-0.373455	1	Ube2q1	Virgin_vs_E18	CA3	0.0423726
0.00181017	0.184876	1	Luc7l2	Virgin_vs_E18	CA3	0.0424713
0.00182088	-0.245662	1	Rtn4	Virgin_vs_E18	CA3	0.0425712
0.0018347	0.220694	1	A330044P14Rik	Virgin_vs_E18	CA3	0.042594
0.00183478	-0.237367	1	Frrs1l	Virgin_vs_E18	CA3	0.042594
0.00185524	-0.319411	1	Arpc5	Virgin_vs_E18	CA3	0.0429179
0.00190076	0.232395	1	Ccdc6	Virgin_vs_E18	CA3	0.0438173
0.0019301	0.223863	1	Zfp488	Virgin_vs_E18	CA3	0.0443385
0.00195212	0.216868	1	1500004A13Rik	Virgin_vs_E18	CA3	0.0446887
0.00196594	0.226131	1	Gm2694	Virgin_vs_E18	CA3	0.0447097
0.00196806	0.346377	1	Rufy2	Virgin_vs_E18	CA3	0.0447097
0.001982	0.288786	1	Gse1	Virgin_vs_E18	CA3	0.0447097
0.0019827	0.237644	1	Scin	Virgin_vs_E18	CA3	0.0447097
0.00198695	0.299196	1	Irf2	Virgin_vs_E18	CA3	0.0447097
0.00200448	-0.367015	1	Sar1a	Virgin_vs_E18	CA3	0.0449326
0.00201048	-0.360989	1	Dlg4	Virgin_vs_E18	CA3	0.0449326
0.0020373	0.163071	1	Asun	Virgin_vs_E18	CA3	0.045378
0.00205535	-0.33531	1	Mapk8ip2	Virgin_vs_E18	CA3	0.045626
0.00206926	0.176196	1	Magt1	Virgin_vs_E18	CA3	0.0457015
0.00207261	0.330417	1	Tmlhe	Virgin_vs_E18	CA3	0.0457015
0.00208843	0.250763	1	Rbm17	Virgin_vs_E18	CA3	0.0458639
0.00209528	-0.222124	1	Atp2a2	Virgin_vs_E18	CA3	0.0458639
0.00210085	-0.302148	1	Secisbp2l	Virgin_vs_E18	CA3	0.0458639
0.00211778	-0.228128	1	Cyfip2	Virgin_vs_E18	CA3	0.0460809
0.00213757	-0.324746	1	Nup62	Virgin_vs_E18	CA3	0.0461631
0.0021409	-0.0115332	1	Nfib	Virgin_vs_E18	CA3	0.0461631
0.00214256	0.233027	1	Adam28	Virgin_vs_E18	CA3	0.0461631
0.0021608	0.419961	1	Ttc21b	Virgin_vs_E18	CA3	0.0464045
0.00217944	0.291774	1	Thyn1	Virgin_vs_E18	CA3	0.0466527
0.00221857	-0.360407	1	Scamp1	Virgin_vs_E18	CA3	0.0472285
0.00222066	0.22599	1	0610031O16Rik	Virgin_vs_E18	CA3	0.0472285
0.0022626	-0.193961	1	Chchd2	Virgin_vs_E18	CA3	0.0479656
0.00227616	-0.30965	1	Irgq	Virgin_vs_E18	CA3	0.0480985
0.00236499	0.253366	1	Kcnq2	Virgin_vs_E18	CA3	0.0497891
0.00237943	-0.234115	1	Napb	Virgin_vs_E18	CA3	0.0497891
0.00238249	0.289163	1	Spns2	Virgin_vs_E18	CA3	0.0497891
0.00238637	0.159377	1	Lynx1	Virgin_vs_E18	CA3	0.0497891
0.00241275	0.283761	1	Wdr1	Virgin_vs_E18	CA3	0.0501806
0.00245218	0.256886	1	Clmn	Virgin_vs_E18	CA3	0.0507255
0.00245434	0.146727	1	Tmed5	Virgin_vs_E18	CA3	0.0507255
0.0025694	-0.190449	1	Snrpn	Virgin_vs_E18	CA3	0.0529376
0.00257875	0.267286	1	Fyco1	Virgin_vs_E18	CA3	0.0529648
0.00259735	0.265033	1	Cetn3	Virgin_vs_E18	CA3	0.0531812
0.00263984	0.31428	1	Slc28a3	Virgin_vs_E18	CA3	0.0538353
0.00264563	-0.292373	1	Wdr7	Virgin_vs_E18	CA3	0.0538353
0.00266153	0.132395	1	Scfd2	Virgin_vs_E18	CA3	0.0539922
0.00268598	0.203961	1	Dlx6	Virgin_vs_E18	CA3	0.054321
0.00272296	0.172197	1	BC030499	Virgin_vs_E18	CA3	0.0548222
0.00272739	0.265284	1	H2-T23	Virgin_vs_E18	CA3	0.0548222
0.00274217	0.142658	1	Slc25a23	Virgin_vs_E18	CA3	0.0549518
0.00279397	0.237249	1	Bhmt2	Virgin_vs_E18	CA3	0.0558202
0.00286484	-0.236529	1	Stxbp1	Virgin_vs_E18	CA3	0.0570631
0.00289147	0.331207	1	Dot1l	Virgin_vs_E18	CA3	0.0573004
0.00289414	0.259045	1	Rbm28	Virgin_vs_E18	CA3	0.0573004
0.00291074	-0.101129	1	Syt11	Virgin_vs_E18	CA3	0.0574567
0.00292948	0.172864	1	Gtpbp2	Virgin_vs_E18	CA3	0.0576538
0.00295802	0.192061	1	Gad2	Virgin_vs_E18	CA3	0.0578833
0.00295869	0.195075	1	Nos1ap	Virgin_vs_E18	CA3	0.0578833
0.002975	-0.292676	1	Prkce	Virgin_vs_E18	CA3	0.0580301
0.0030097	-0.27328	1	Cadm2	Virgin_vs_E18	CA3	0.0583692
0.00301009	0.327475	1	Iqgap1	Virgin_vs_E18	CA3	0.0583692
0.00303465	-0.370534	1	Rnf115	Virgin_vs_E18	CA3	0.0586729
0.00306552	-0.175258	1	Atp6v0c	Virgin_vs_E18	CA3	0.0587418
0.00306646	0.273186	1	Atg16l1	Virgin_vs_E18	CA3	0.0587418
0.00309027	0.366458	1	Scmh1	Virgin_vs_E18	CA3	0.0587418
0.00309221	0.215024	1	Pde7a	Virgin_vs_E18	CA3	0.0587418
0.00310079	0.22022	1	Fam133b	Virgin_vs_E18	CA3	0.0587418
0.00310312	0.220151	1	Helz	Virgin_vs_E18	CA3	0.0587418
0.00310879	0.168388	1	Mau2	Virgin_vs_E18	CA3	0.0587418
0.00311701	0.114711	1	Paip2b	Virgin_vs_E18	CA3	0.0587418
0.0031184	-0.255963	1	Ppp2r5e	Virgin_vs_E18	CA3	0.0587418
0.00315677	0.318886	1	Gas6	Virgin_vs_E18	CA3	0.0592951
0.00318791	0.230658	1	Traip	Virgin_vs_E18	CA3	0.05971
0.00322445	-0.284672	1	Pnma2	Virgin_vs_E18	CA3	0.0600045
0.00322733	-0.0174037	1	Ddx26b	Virgin_vs_E18	CA3	0.0600045
0.00323094	0.301671	1	Chpt1	Virgin_vs_E18	CA3	0.0600045
0.00327985	0.101892	1	Acap2	Virgin_vs_E18	CA3	0.0607418
0.00330248	0.269974	1	Raf1	Virgin_vs_E18	CA3	0.0609894
0.00331494	0.293344	1	Gm17494	Virgin_vs_E18	CA3	0.0610485
0.00335951	-0.232052	1	Ywhae	Virgin_vs_E18	CA3	0.0616723
0.00336751	0.202059	1	Papolg	Virgin_vs_E18	CA3	0.0616723
0.00338113	-0.0138116	1	Mfap3	Virgin_vs_E18	CA3	0.0617501
0.0033983	-0.291924	1	Sumo2	Virgin_vs_E18	CA3	0.0617586
0.00340033	-0.295282	1	2610301B20Rik	Virgin_vs_E18	CA3	0.0617586
0.00342444	-0.339466	1	Kpna3	Virgin_vs_E18	CA3	0.0620138
0.00343319	0.160707	1	Abcb4	Virgin_vs_E18	CA3	0.0620138
0.00345695	0.196171	1	Mapk1ip1	Virgin_vs_E18	CA3	0.0622724
0.00348896	0.194572	1	Snx14	Virgin_vs_E18	CA3	0.0626778
0.00352048	-0.254716	1	Tsc22d1	Virgin_vs_E18	CA3	0.0630721
0.00353708	-0.0282895	1	Gm10125	Virgin_vs_E18	CA3	0.0631978
0.00355794	0.286236	1	Lrrc7	Virgin_vs_E18	CA3	0.0633987
0.00358379	0.0607664	1	Slco3a1	Virgin_vs_E18	CA3	0.0636871
0.00366604	-0.287818	1	Atp2c1	Virgin_vs_E18	CA3	0.0649514
0.00367464	0.114457	1	Sbno1	Virgin_vs_E18	CA3	0.0649514
0.00368675	-0.314714	1	Slc17a7	Virgin_vs_E18	CA3	0.0649914
0.00369921	-0.112278	1	Dgkg	Virgin_vs_E18	CA3	0.065037
0.00371781	0.184478	1	Ifitm10	Virgin_vs_E18	CA3	0.0651903
0.0037282	-0.355889	1	Drap1	Virgin_vs_E18	CA3	0.0651991
0.00378504	0.259229	1	Myo6	Virgin_vs_E18	CA3	0.0660179
0.00381505	0.349433	1	Kctd6	Virgin_vs_E18	CA3	0.0663657
0.00385146	-0.0612271	1	Pabpn1	Virgin_vs_E18	CA3	0.0668229
0.0038843	0.10921	1	Pcnx2	Virgin_vs_E18	CA3	0.0669115
0.00389085	0.300346	1	Anapc11	Virgin_vs_E18	CA3	0.0669115
0.00389146	0.254006	1	Zfp266	Virgin_vs_E18	CA3	0.0669115
0.00389716	0.334064	1	Dcun1d1	Virgin_vs_E18	CA3	0.0669115
0.00391212	0.231717	1	Tada1	Virgin_vs_E18	CA3	0.0669907
0.0039221	-0.238175	1	Nbr1	Virgin_vs_E18	CA3	0.0669907
0.00397833	-0.368248	1	Lsm8	Virgin_vs_E18	CA3	0.0677755
0.00400819	0.256017	1	Map4k5	Virgin_vs_E18	CA3	0.0681082
0.00407372	0.182635	1	Ncoa2	Virgin_vs_E18	CA3	0.0688561
0.00408148	-0.34302	1	Fez1	Virgin_vs_E18	CA3	0.0688561
0.00408354	-0.298809	1	Copg1	Virgin_vs_E18	CA3	0.0688561
0.0041014	0.304738	1	Mtg2	Virgin_vs_E18	CA3	0.068981
0.00411963	0.307392	1	Milr1	Virgin_vs_E18	CA3	0.0691113
0.0041773	0.227199	1	Homer2	Virgin_vs_E18	CA3	0.0699008
0.00422038	0.0619776	1	Cul4a	Virgin_vs_E18	CA3	0.0704429
0.00429054	-0.105219	1	Tmem59l	Virgin_vs_E18	CA3	0.0711745
0.00429071	0.136191	1	Sephs1	Virgin_vs_E18	CA3	0.0711745
0.00430206	-0.368859	1	Dnajb6	Virgin_vs_E18	CA3	0.0711745
0.00431282	-0.363652	1	Rlim	Virgin_vs_E18	CA3	0.0711745
0.00432748	-0.344563	1	Sphkap	Virgin_vs_E18	CA3	0.0711745
0.00432898	-0.263186	1	Vdac1	Virgin_vs_E18	CA3	0.0711745
0.00434	0.347451	1	Dopey1	Virgin_vs_E18	CA3	0.0711782
0.00436367	-0.282305	1	Ppp1cb	Virgin_vs_E18	CA3	0.0713686
0.00437965	0.211967	1	Pkp2	Virgin_vs_E18	CA3	0.0713686
0.00438409	-0.315256	1	Purb	Virgin_vs_E18	CA3	0.0713686
0.00439744	0.255858	1	A330023F24Rik	Virgin_vs_E18	CA3	0.0714096
0.00442545	0.230729	1	0610038B21Rik	Virgin_vs_E18	CA3	0.071688
0.00443924	0.126754	1	Dtl	Virgin_vs_E18	CA3	0.071735
0.00448442	0.29702	1	Gpi1	Virgin_vs_E18	CA3	0.0722576
0.00449727	0.257755	1	Dagla	Virgin_vs_E18	CA3	0.0722576
0.00450446	-0.258434	1	Usp9x	Virgin_vs_E18	CA3	0.0722576
0.00453456	0.137659	1	Exosc10	Virgin_vs_E18	CA3	0.072433
0.00453736	-0.220031	1	Epha7	Virgin_vs_E18	CA3	0.072433
0.00455728	0.236982	1	Hook1	Virgin_vs_E18	CA3	0.0725753
0.0045778	0.302186	1	Usp4	Virgin_vs_E18	CA3	0.0727263
0.00460693	-0.292515	1	AC149090.1	Virgin_vs_E18	CA3	0.0729824
0.00461606	0.125565	1	Nrbp2	Virgin_vs_E18	CA3	0.0729824
0.00466381	-0.309825	1	Laptm4a	Virgin_vs_E18	CA3	0.073561
0.00473312	0.153511	1	Prkag3	Virgin_vs_E18	CA3	0.0744761
0.00474936	-0.140439	1	Isca1	Virgin_vs_E18	CA3	0.0745537
0.00483223	0.170289	1	Dgke	Virgin_vs_E18	CA3	0.0756743
0.00486716	0.225273	1	Hsf2	Virgin_vs_E18	CA3	0.0760407
0.00489096	0.079822	1	Gm17615	Virgin_vs_E18	CA3	0.076232
0.00490963	0.223207	1	Rab33b	Virgin_vs_E18	CA3	0.0763425
0.00494723	0.158437	1	Fgfr1	Virgin_vs_E18	CA3	0.076746
0.00502312	0.0687982	1	Mcmdc2	Virgin_vs_E18	CA3	0.0777404
0.00516265	0.180923	1	Zfp65	Virgin_vs_E18	CA3	0.0797127
0.0052125	0.0179765	1	Ssbp1	Virgin_vs_E18	CA3	0.0802845
0.00522403	-0.312729	1	Gabarap	Virgin_vs_E18	CA3	0.0802845
0.00524015	0.310538	1	F10	Virgin_vs_E18	CA3	0.0803271
0.00525117	0.102248	1	Clk2	Virgin_vs_E18	CA3	0.0803271
0.00530783	0.196463	1	Phxr4	Virgin_vs_E18	CA3	0.0809531
0.00531665	0.235119	1	Hadhb	Virgin_vs_E18	CA3	0.0809531
0.00535221	-0.289183	1	Trim35	Virgin_vs_E18	CA3	0.0813067
0.00538334	-0.222068	1	Pgm2l1	Virgin_vs_E18	CA3	0.081582
0.00539508	-0.320086	1	Rps4x	Virgin_vs_E18	CA3	0.081582
0.00543054	0.253086	1	Ptcra	Virgin_vs_E18	CA3	0.0819304
0.00552871	0.266032	1	Gatad2b	Virgin_vs_E18	CA3	0.0831082
0.00554593	0.355175	1	Sparc	Virgin_vs_E18	CA3	0.0831082
0.00554643	-0.208068	1	Ndrg3	Virgin_vs_E18	CA3	0.0831082
0.0055829	0.194178	1	Noa1	Virgin_vs_E18	CA3	0.083465
0.00562031	0.234479	1	2310022A10Rik	Virgin_vs_E18	CA3	0.0838341
0.0056349	0.123963	1	Ccdc93	Virgin_vs_E18	CA3	0.083862
0.00570168	0.372742	1	Ptn	Virgin_vs_E18	CA3	0.0846648
0.00584838	0.325276	1	Rev1	Virgin_vs_E18	CA3	0.0866481
0.00586167	0.12235	1	Plp1	Virgin_vs_E18	CA3	0.0866502
0.00592237	0.111943	1	Dpysl2	Virgin_vs_E18	CA3	0.0871716
0.00594439	0.116229	1	Hbs1l	Virgin_vs_E18	CA3	0.0871716
0.00594824	-0.00608135	1	Syvn1	Virgin_vs_E18	CA3	0.0871716
0.00595585	-0.232953	1	Atp6v1g2	Virgin_vs_E18	CA3	0.0871716
0.00596305	0.243059	1	D5Ertd579e	Virgin_vs_E18	CA3	0.0871716
0.00604283	0.259715	1	Dlgap5	Virgin_vs_E18	CA3	0.0881424
0.0060726	0.299354	1	Gm26853	Virgin_vs_E18	CA3	0.0882656
0.00607805	-0.15735	1	Atp6v1b2	Virgin_vs_E18	CA3	0.0882656
0.00613281	0.0671319	1	Xpo1	Virgin_vs_E18	CA3	0.0888651
0.00615756	0.210733	1	4930509G22Rik	Virgin_vs_E18	CA3	0.089028
0.00624396	0.297002	1	Taf1	Virgin_vs_E18	CA3	0.0900797
0.00627046	0.146293	1	Tpp2	Virgin_vs_E18	CA3	0.0902645
0.00629576	-0.484065	1	1810013L24Rik	Virgin_vs_E18	CA3	0.0903826
0.00631944	0.217989	1	Tmem72	Virgin_vs_E18	CA3	0.0903826
0.00631979	0.232511	1	Nudcd2	Virgin_vs_E18	CA3	0.0903826
0.00634731	0.231089	1	5430416N02Rik	Virgin_vs_E18	CA3	0.0905797
0.00643792	-0.195463	1	Gprasp1	Virgin_vs_E18	CA3	0.0916744
0.00647397	0.17153	1	Ggnbp2	Virgin_vs_E18	CA3	0.091989
0.00654653	-0.201279	1	Prkcb	Virgin_vs_E18	CA3	0.0928199
0.00659451	-0.349806	1	Phyhipl	Virgin_vs_E18	CA3	0.0932996
0.00663125	-0.0604227	1	Gria1	Virgin_vs_E18	CA3	0.0936185
0.00668952	0.188836	1	Slc6a7	Virgin_vs_E18	CA3	0.0940518
0.00669047	0.273614	1	Gm28578	Virgin_vs_E18	CA3	0.0940518
0.00674786	0.327014	1	Prdm15	Virgin_vs_E18	CA3	0.0946567
0.00677107	0.159868	1	Enah	Virgin_vs_E18	CA3	0.0947806
0.00678748	-0.224432	1	Hdlbp	Virgin_vs_E18	CA3	0.0948091
0.00682382	0.141403	1	Hsd17b12	Virgin_vs_E18	CA3	0.0951151
0.007004	0.268664	1	Fads6	Virgin_vs_E18	CA3	0.0972839
0.00700892	0.0834315	1	Ppm1a	Virgin_vs_E18	CA3	0.0972839
0.00708786	-0.171387	1	Camk2b	Virgin_vs_E18	CA3	0.0981728
0.00710337	0.23439	1	Vwa1	Virgin_vs_E18	CA3	0.0981814
0.0072173	-0.106805	1	4933427I04Rik	Virgin_vs_E18	CA3	0.0995475
0.00730584	-0.0867258	1	Serinc1	Virgin_vs_E18	CA3	0.100482
0.00731814	-0.0817786	1	Mtch1	Virgin_vs_E18	CA3	0.100482
0.00733078	0.26655	1	Mrpl19	Virgin_vs_E18	CA3	0.100482
0.00745585	-0.362562	1	Rplp1	Virgin_vs_E18	CA3	0.101815
0.00745893	0.209197	1	Rint1	Virgin_vs_E18	CA3	0.101815
0.0075245	-0.319837	1	3110035E14Rik	Virgin_vs_E18	CA3	0.102498
0.00761048	-0.107162	1	Syn2	Virgin_vs_E18	CA3	0.103455
0.0076513	-0.242013	1	Gpalpp1	Virgin_vs_E18	CA3	0.103777
0.0076707	-0.237309	1	Tars	Virgin_vs_E18	CA3	0.103777
0.00768137	0.35326	1	Polr2l	Virgin_vs_E18	CA3	0.103777
0.00779459	-0.333341	1	Rerg	Virgin_vs_E18	CA3	0.105092
0.00782947	0.0253609	1	Hspb11	Virgin_vs_E18	CA3	0.105346
0.0078557	-0.31248	1	Map2k1	Virgin_vs_E18	CA3	0.105484
0.00788005	-0.242591	1	Disp2	Virgin_vs_E18	CA3	0.105522
0.00789055	-0.131054	1	Abr	Virgin_vs_E18	CA3	0.105522
0.00793026	-0.301731	1	Hspa9	Virgin_vs_E18	CA3	0.105632
0.0079309	-0.086001	1	Nrgn	Virgin_vs_E18	CA3	0.105632
0.00794684	0.324098	1	Dusp11	Virgin_vs_E18	CA3	0.105632
0.00797395	0.311833	1	Slc38a6	Virgin_vs_E18	CA3	0.105779
0.00808756	-0.297929	1	Sumo3	Virgin_vs_E18	CA3	0.107071
0.00823316	-0.175252	1	Cntn1	Virgin_vs_E18	CA3	0.10878
0.0083868	0.242952	1	Ints8	Virgin_vs_E18	CA3	0.110588
0.00840744	0.0664159	1	Wdr75	Virgin_vs_E18	CA3	0.110639
0.00844543	0.272442	1	Zfp316	Virgin_vs_E18	CA3	0.110918
0.00847977	0.291716	1	Gclc	Virgin_vs_E18	CA3	0.111147
0.00856033	0.161675	1	Ankrd44	Virgin_vs_E18	CA3	0.111858
0.00856794	0.197203	1	Clk4	Virgin_vs_E18	CA3	0.111858
0.00868184	0.271914	1	Aqr	Virgin_vs_E18	CA3	0.113121
0.00872197	0.283418	1	Lrfn5	Virgin_vs_E18	CA3	0.113385
0.00874058	0.297198	1	Rft1	Virgin_vs_E18	CA3	0.113385
0.00875763	0.136799	1	C920009B18Rik	Virgin_vs_E18	CA3	0.113385
0.00877089	0.122491	1	Unc45a	Virgin_vs_E18	CA3	0.113385
0.0088283	0.129944	1	Dpf2	Virgin_vs_E18	CA3	0.113503
0.00883274	-0.167064	1	Itm2b	Virgin_vs_E18	CA3	0.113503
0.00884885	0.18236	1	Bicd1	Virgin_vs_E18	CA3	0.113503
0.00885406	-0.0750329	1	Arhgef25	Virgin_vs_E18	CA3	0.113503
0.00886609	0.212919	1	Faap100	Virgin_vs_E18	CA3	0.113503
0.00897944	0.103326	1	Stx3	Virgin_vs_E18	CA3	0.114731
0.00902229	0.320328	1	Tc2n	Virgin_vs_E18	CA3	0.114863
0.00902458	0.273471	1	Arid5a	Virgin_vs_E18	CA3	0.114863
0.00911459	-0.252998	1	mt-Atp8	Virgin_vs_E18	CA3	0.115785
0.00913691	-0.159792	1	Stmn3	Virgin_vs_E18	CA3	0.115845
0.00922392	-0.292779	1	Rpl34	Virgin_vs_E18	CA3	0.11667
0.00923732	0.310835	1	Csgalnact2	Virgin_vs_E18	CA3	0.11667
0.00926889	-0.180836	1	Sv2b	Virgin_vs_E18	CA3	0.116772
0.00928083	-0.34515	1	Hmgcs1	Virgin_vs_E18	CA3	0.116772
0.00937837	-0.224207	1	Eno1	Virgin_vs_E18	CA3	0.117774
0.00949978	-0.271505	1	Sdcbp	Virgin_vs_E18	CA3	0.119072
0.00956365	-0.334176	1	Slc25a14	Virgin_vs_E18	CA3	0.119569
0.00958176	0.102362	1	Tbce	Virgin_vs_E18	CA3	0.119569
0.00959385	0.266607	1	BC026585	Virgin_vs_E18	CA3	0.119569
0.00971254	-0.0718539	1	Gm12258	Virgin_vs_E18	CA3	0.120615
0.00972386	-0.0259637	1	Acad9	Virgin_vs_E18	CA3	0.120615
0.00974096	0.153864	1	Glrx2	Virgin_vs_E18	CA3	0.120615
0.00976784	0.108501	1	Tmem29	Virgin_vs_E18	CA3	0.120615
0.00976923	-0.0114238	1	Vamp2	Virgin_vs_E18	CA3	0.120615
0.00982679	-0.208879	1	Reep5	Virgin_vs_E18	CA3	0.121014
0.00984786	-0.245162	1	Dock4	Virgin_vs_E18	CA3	0.121014
0.00985662	0.0606302	1	Plekhm3	Virgin_vs_E18	CA3	0.121014
0.00991137	0.018001	1	Ces2b	Virgin_vs_E18	CA3	0.12146
0.00994145	0.199755	1	Snx1	Virgin_vs_E18	CA3	0.121603
0.0100215	-0.283299	1	Slmo2	Virgin_vs_E18	CA3	0.122139
0.0100223	0.294402	1	Cfap74	Virgin_vs_E18	CA3	0.122139
0.0100409	-0.368972	1	Irs2	Virgin_vs_E18	CA3	0.122139
0.0100799	-0.256697	1	Nanos1	Virgin_vs_E18	CA3	0.122389
0.0101152	0.0872772	1	Dync1i2	Virgin_vs_E18	CA3	0.122412
0.0101261	-0.00314587	1	Zdhhc20	Virgin_vs_E18	CA3	0.122412
0.0101446	-0.252805	1	Ran	Virgin_vs_E18	CA3	0.122412
0.0101561	0.0918063	1	Cacnb1	Virgin_vs_E18	CA3	0.122412
0.0101858	0.14787	1	Loxl2	Virgin_vs_E18	CA3	0.122545
0.0102166	0.11001	1	Aldh1a3	Virgin_vs_E18	CA3	0.122692
0.0102388	0.257345	1	Mei4	Virgin_vs_E18	CA3	0.122735
0.0102825	0.279562	1	Ncbp3	Virgin_vs_E18	CA3	0.123036
0.0103054	0.243805	1	Pik3c2a	Virgin_vs_E18	CA3	0.123069
0.0103227	0.334877	1	Lamp2	Virgin_vs_E18	CA3	0.123069
0.010602	0.263488	1	Spag1	Virgin_vs_E18	CA3	0.126071
0.0106127	-0.12541	1	Strbp	Virgin_vs_E18	CA3	0.126071
0.0106505	-0.292077	1	Rps14	Virgin_vs_E18	CA3	0.126285
0.010669	0.218515	1	Ppip5k1	Virgin_vs_E18	CA3	0.126285
0.0107158	0.000211282	1	Mapt	Virgin_vs_E18	CA3	0.126459
0.0107221	-0.263018	1	Atp5a1	Virgin_vs_E18	CA3	0.126459
0.0107789	0.259133	1	Suclg2	Virgin_vs_E18	CA3	0.126902
0.0108371	0.285807	1	Rnpep	Virgin_vs_E18	CA3	0.127336
0.0108736	-0.323949	1	Nrsn1	Virgin_vs_E18	CA3	0.127336
0.0108736	0.254991	1	Atp1a2	Virgin_vs_E18	CA3	0.127336
0.0109058	0.271598	1	Mas1	Virgin_vs_E18	CA3	0.127486
0.0109283	0.0893068	1	Grk4	Virgin_vs_E18	CA3	0.127523
0.0110213	-0.259448	1	Rab3a	Virgin_vs_E18	CA3	0.12838
0.0111292	0.0351402	1	Recql	Virgin_vs_E18	CA3	0.129409
0.0111875	0.130119	1	Hus1	Virgin_vs_E18	CA3	0.129565
0.0111985	-0.2943	1	Mapre1	Virgin_vs_E18	CA3	0.129565
0.0112016	-0.329136	1	Ildr2	Virgin_vs_E18	CA3	0.129565
0.0112366	0.28591	1	Ftsj1	Virgin_vs_E18	CA3	0.129743
0.0112568	0.124332	1	Adgrb3	Virgin_vs_E18	CA3	0.129748
0.0113078	0.247147	1	Churc1	Virgin_vs_E18	CA3	0.130109
0.0113577	-0.229548	1	Nptxr	Virgin_vs_E18	CA3	0.130456
0.0114061	0.280537	1	Slc39a2	Virgin_vs_E18	CA3	0.130783
0.0114731	0.243584	1	Tango2	Virgin_vs_E18	CA3	0.131323
0.0115452	0.203639	1	Disc1	Virgin_vs_E18	CA3	0.131919
0.0115754	0.106176	1	Zranb2	Virgin_vs_E18	CA3	0.131951
0.011588	0.170262	1	Jakmip1	Virgin_vs_E18	CA3	0.131951
0.0116548	0.0877582	1	Bms1	Virgin_vs_E18	CA3	0.132261
0.0116844	0.132248	1	Rian	Virgin_vs_E18	CA3	0.132261
0.0116983	0.192339	1	Gprin3	Virgin_vs_E18	CA3	0.132261
0.0117072	0.280864	1	Atp11c	Virgin_vs_E18	CA3	0.132261
0.0117155	-0.0898124	1	Stt3b	Virgin_vs_E18	CA3	0.132261
0.0118098	0.212849	1	N6amt1	Virgin_vs_E18	CA3	0.132873
0.01181	-0.0222707	1	Agap1	Virgin_vs_E18	CA3	0.132873
0.0118304	-0.196194	1	Adat1	Virgin_vs_E18	CA3	0.132875
0.0118681	0.131206	1	Carnmt1	Virgin_vs_E18	CA3	0.133072
0.0119372	0.122724	1	Ap1s3	Virgin_vs_E18	CA3	0.13362
0.0119683	0.0899327	1	Gm16222	Virgin_vs_E18	CA3	0.133741
0.0119928	0.202829	1	Dnajc3	Virgin_vs_E18	CA3	0.133788
0.0120245	0.224453	1	Sel1l	Virgin_vs_E18	CA3	0.133915
0.0120532	-0.272221	1	Fam49a	Virgin_vs_E18	CA3	0.134007
0.0121276	-0.209324	1	Zfr	Virgin_vs_E18	CA3	0.134608
0.012205	0.15478	1	Cers1	Virgin_vs_E18	CA3	0.134924
0.0122172	-0.156104	1	2700097O09Rik	Virgin_vs_E18	CA3	0.134924
0.0122175	-0.27768	1	Ubqln1	Virgin_vs_E18	CA3	0.134924
0.0122871	-0.308715	1	Scoc	Virgin_vs_E18	CA3	0.135467
0.0123384	-0.0857064	1	Bri3bp	Virgin_vs_E18	CA3	0.135805
0.0123729	0.266783	1	Gm37529	Virgin_vs_E18	CA3	0.135958
0.012659	0.225778	1	2010109I03Rik	Virgin_vs_E18	CA3	0.138793
0.012673	0.221559	1	Zfp280d	Virgin_vs_E18	CA3	0.138793
0.0127663	0.0768758	1	Adarb1	Virgin_vs_E18	CA3	0.139517
0.0127815	-0.254263	1	Cdk5r1	Virgin_vs_E18	CA3	0.139517
0.012925	0.141961	1	Acsl6	Virgin_vs_E18	CA3	0.14085
0.0129881	0.213532	1	Hist3h2a	Virgin_vs_E18	CA3	0.141207
0.0130006	0.0968204	1	Phyhd1	Virgin_vs_E18	CA3	0.141207
0.0131081	0.294998	1	Chic2	Virgin_vs_E18	CA3	0.142141
0.0131997	-0.179576	1	Lsamp	Virgin_vs_E18	CA3	0.142899
0.0132867	-0.178126	1	Pfn2	Virgin_vs_E18	CA3	0.143089
0.0132909	0.0990799	1	Dnajc10	Virgin_vs_E18	CA3	0.143089
0.0133032	0.138487	1	Hnrnpa2b1	Virgin_vs_E18	CA3	0.143089
0.0133398	0.257382	1	Ubap2l	Virgin_vs_E18	CA3	0.143089
0.0133538	-0.197179	1	Ppp1r21	Virgin_vs_E18	CA3	0.143089
0.0133691	-0.315646	1	Ncan	Virgin_vs_E18	CA3	0.143089
0.0133691	-0.0335932	1	Wdfy1	Virgin_vs_E18	CA3	0.143089
0.0134216	0.216687	1	Far1	Virgin_vs_E18	CA3	0.143418
0.0134632	-0.182952	1	Ube2d2a	Virgin_vs_E18	CA3	0.143629
0.0135265	0.0802954	1	Mbtd1	Virgin_vs_E18	CA3	0.144072
0.0135618	-0.34407	1	Bnip3	Virgin_vs_E18	CA3	0.144215
0.0136884	0.284139	1	AK010878	Virgin_vs_E18	CA3	0.145196
0.0137189	0.213964	1	AI838599	Virgin_vs_E18	CA3	0.145196
0.0137201	0.0641004	1	Clip1	Virgin_vs_E18	CA3	0.145196
0.013763	-0.249577	1	Pts	Virgin_vs_E18	CA3	0.145415
0.0139046	0.16575	1	Cacna1a	Virgin_vs_E18	CA3	0.14645
0.0139053	0.269647	1	Gm42488	Virgin_vs_E18	CA3	0.14645
0.0140478	0.203628	1	Asah1	Virgin_vs_E18	CA3	0.147714
0.0141139	0.237499	1	2810417H13Rik	Virgin_vs_E18	CA3	0.148122
0.0141315	0.125837	1	Tub	Virgin_vs_E18	CA3	0.148122
0.0141757	0.240235	1	Axin2	Virgin_vs_E18	CA3	0.148245
0.0142115	0.146821	1	Kdsr	Virgin_vs_E18	CA3	0.148245
0.0142323	-0.196429	1	Rps3a1	Virgin_vs_E18	CA3	0.148245
0.0142331	-0.235514	1	Eid1	Virgin_vs_E18	CA3	0.148245
0.0142592	0.175633	1	Hyal3	Virgin_vs_E18	CA3	0.148265
0.0142983	0.306872	1	Mttp	Virgin_vs_E18	CA3	0.148265
0.0143025	0.273177	1	Hspa12b	Virgin_vs_E18	CA3	0.148265
0.014466	0.0683647	1	Echs1	Virgin_vs_E18	CA3	0.149527
0.0144697	0.198228	1	Gemin8	Virgin_vs_E18	CA3	0.149527
0.0145203	-0.322693	1	Anp32a	Virgin_vs_E18	CA3	0.149815
0.0145795	-0.204228	1	Mapk10	Virgin_vs_E18	CA3	0.150191
0.0146091	-0.250294	1	Icam5	Virgin_vs_E18	CA3	0.150262
0.0146626	-0.290593	1	Elmo1	Virgin_vs_E18	CA3	0.150577
0.0147332	0.296316	1	Tmem43	Virgin_vs_E18	CA3	0.15101
0.0147671	0.184923	1	Pom121	Virgin_vs_E18	CA3	0.15101
0.0147735	-0.322749	1	Gpbp1	Virgin_vs_E18	CA3	0.15101
0.0149153	-0.0131242	1	Ttc3	Virgin_vs_E18	CA3	0.152224
0.014947	0.0800291	1	Tia1	Virgin_vs_E18	CA3	0.152234
0.0149625	0.026575	1	4932438A13Rik	Virgin_vs_E18	CA3	0.152234
0.0150217	-0.311763	1	Ranbp6	Virgin_vs_E18	CA3	0.152601
0.0151332	-0.229907	1	Cltc	Virgin_vs_E18	CA3	0.153497
0.0151781	0.145405	1	Gm6297	Virgin_vs_E18	CA3	0.153704
0.0152002	-0.206399	1	B4galt4	Virgin_vs_E18	CA3	0.153704
0.0152823	0.261323	1	Ube2e2	Virgin_vs_E18	CA3	0.153707
0.0153116	0.144493	1	Fam178a	Virgin_vs_E18	CA3	0.153707
0.0153147	0.21355	1	Ncoa6	Virgin_vs_E18	CA3	0.153707
0.015323	-0.0108064	1	Gm43536	Virgin_vs_E18	CA3	0.153707
0.0153398	-0.246879	1	Arf3	Virgin_vs_E18	CA3	0.153707
0.0153424	0.127466	1	Ddx39	Virgin_vs_E18	CA3	0.153707
0.0153637	-0.284894	1	Scn3b	Virgin_vs_E18	CA3	0.153707
0.0154347	-0.271809	1	Gpr137	Virgin_vs_E18	CA3	0.153814
0.0154556	0.170794	1	Pla2r1	Virgin_vs_E18	CA3	0.153814
0.0154696	-0.190447	1	Basp1	Virgin_vs_E18	CA3	0.153814
0.0154847	0.243199	1	Gm10827	Virgin_vs_E18	CA3	0.153814
0.0154911	-0.216689	1	Calm3	Virgin_vs_E18	CA3	0.153814
0.0155351	0.315953	1	Prdx6	Virgin_vs_E18	CA3	0.15402
0.0155694	-0.00405942	1	Ppme1	Virgin_vs_E18	CA3	0.154101
0.0155901	0.153196	1	Micu2	Virgin_vs_E18	CA3	0.154101
0.0156715	0.209856	1	Stat2	Virgin_vs_E18	CA3	0.154674
0.0158413	-0.0219966	1	Lpp	Virgin_vs_E18	CA3	0.156081
0.0158622	0.180318	1	Ms4a6c	Virgin_vs_E18	CA3	0.156081
0.0158851	-0.181543	1	Mapk1	Virgin_vs_E18	CA3	0.156081
0.0159089	-0.217832	1	Fkbp1b	Virgin_vs_E18	CA3	0.156082
0.0160009	0.187475	1	Chd4	Virgin_vs_E18	CA3	0.156752
0.0160536	0.0173678	1	Sos2	Virgin_vs_E18	CA3	0.157035
0.0160812	0.192505	1	Ahsa2	Virgin_vs_E18	CA3	0.157072
0.0161622	-0.166339	1	Atxn7l3b	Virgin_vs_E18	CA3	0.157629
0.016195	0.200209	1	Uimc1	Virgin_vs_E18	CA3	0.157716
0.0163613	-0.285979	1	Tug1	Virgin_vs_E18	CA3	0.159101
0.0167542	0.143083	1	Tanc1	Virgin_vs_E18	CA3	0.162213
0.0167638	-0.268231	1	Fam174a	Virgin_vs_E18	CA3	0.162213
0.0167855	0.0654843	1	Jakmip2	Virgin_vs_E18	CA3	0.162213
0.0168217	0.289137	1	Ccpg1os	Virgin_vs_E18	CA3	0.162213
0.0168224	-0.23238	1	Tfrc	Virgin_vs_E18	CA3	0.162213
0.016829	-0.276129	1	Ldha	Virgin_vs_E18	CA3	0.162213
0.0169718	0.156631	1	Uqcrq	Virgin_vs_E18	CA3	0.163351
0.0170835	0.144135	1	Tmem208	Virgin_vs_E18	CA3	0.164186
0.0171728	0.223228	1	Imp4	Virgin_vs_E18	CA3	0.164675
0.0172412	0.096986	1	Zdhhc13	Virgin_vs_E18	CA3	0.164675
0.0172473	0.264542	1	Telo2	Virgin_vs_E18	CA3	0.164675
0.0172499	0.237526	1	AB041806	Virgin_vs_E18	CA3	0.164675
0.0172593	0.172688	1	Malat1	Virgin_vs_E18	CA3	0.164675
0.0173869	-0.263187	1	Dlat	Virgin_vs_E18	CA3	0.1655
0.0174016	0.145353	1	Dtnb	Virgin_vs_E18	CA3	0.1655
0.0174311	0.0681624	1	Sgsm2	Virgin_vs_E18	CA3	0.1655
0.0174904	-0.125705	1	Ina	Virgin_vs_E18	CA3	0.1655
0.0174941	0.158542	1	Clk1	Virgin_vs_E18	CA3	0.1655
0.0175181	0.205792	1	Pla2g2d	Virgin_vs_E18	CA3	0.1655
0.0175214	0.164701	1	Ccdc64	Virgin_vs_E18	CA3	0.1655
0.0176145	0.155031	1	Tra2a	Virgin_vs_E18	CA3	0.165964
0.0176209	0.115095	1	Nudt5	Virgin_vs_E18	CA3	0.165964
0.0176796	-0.297373	1	Rps9	Virgin_vs_E18	CA3	0.166279
0.017785	-0.0312708	1	Celf4	Virgin_vs_E18	CA3	0.166878
0.0177939	0.331687	1	Zfp62	Virgin_vs_E18	CA3	0.166878
0.0179006	0.0766197	1	Dcaf17	Virgin_vs_E18	CA3	0.16764
0.0179429	0.16531	1	6030443J06Rik	Virgin_vs_E18	CA3	0.167798
0.0180416	0.236163	1	Wnt4	Virgin_vs_E18	CA3	0.168482
0.0181214	0.177191	1	Kctd14	Virgin_vs_E18	CA3	0.168551
0.0181365	0.0638645	1	Kdm5d	Virgin_vs_E18	CA3	0.168551
0.0181382	0.0564413	1	Slf1	Virgin_vs_E18	CA3	0.168551
0.0181512	-0.0647926	1	Pfkp	Virgin_vs_E18	CA3	0.168551
0.0182801	0.150884	1	Ccbl1	Virgin_vs_E18	CA3	0.169322
0.0182977	0.181065	1	Mbd5	Virgin_vs_E18	CA3	0.169322
0.0183113	0.24026	1	Rack1	Virgin_vs_E18	CA3	0.169322
0.0183457	-0.25117	1	Foxg1	Virgin_vs_E18	CA3	0.169402
0.0183952	0.157763	1	Fam57a	Virgin_vs_E18	CA3	0.169622
0.0184942	-0.227982	1	Cyb561	Virgin_vs_E18	CA3	0.170297
0.018612	0.227257	1	Csf3r	Virgin_vs_E18	CA3	0.171119
0.0186725	-0.170869	1	Thy1	Virgin_vs_E18	CA3	0.171119
0.0186856	0.181356	1	Wnk1	Virgin_vs_E18	CA3	0.171119
0.0187075	-0.148808	1	Raver2	Virgin_vs_E18	CA3	0.171119
0.0187134	-0.0741938	1	Srsf5	Virgin_vs_E18	CA3	0.171119
0.018773	-0.245688	1	Rpl13a	Virgin_vs_E18	CA3	0.171427
0.0188047	0.136484	1	Nav1	Virgin_vs_E18	CA3	0.171479
0.0189356	-0.267326	1	Atad1	Virgin_vs_E18	CA3	0.172434
0.019046	0.0973503	1	Rslcan18	Virgin_vs_E18	CA3	0.173201
0.0190941	0.227041	1	Fnbp1	Virgin_vs_E18	CA3	0.173398
0.0191344	0.247945	1	BC005537	Virgin_vs_E18	CA3	0.173525
0.019179	-0.0464825	1	Guf1	Virgin_vs_E18	CA3	0.173691
0.0192603	0.182383	1	0610010F05Rik	Virgin_vs_E18	CA3	0.174188
0.0194416	0.157886	1	Stab1	Virgin_vs_E18	CA3	0.175587
0.0196265	-0.137288	1	Arhgap21	Virgin_vs_E18	CA3	0.176491
0.019634	0.222655	1	Mbtps2	Virgin_vs_E18	CA3	0.176491
0.0196396	0.165974	1	Mrpl9	Virgin_vs_E18	CA3	0.176491
0.0196488	0.230054	1	Ice2	Virgin_vs_E18	CA3	0.176491
0.0197356	0.213498	1	Slc25a43	Virgin_vs_E18	CA3	0.1767
0.0197397	0.224914	1	H13	Virgin_vs_E18	CA3	0.1767
0.0197525	-0.0100497	1	Lrp6	Virgin_vs_E18	CA3	0.1767
0.0197977	-0.231994	1	Rnf11	Virgin_vs_E18	CA3	0.176865
0.019859	0.0889293	1	Med13l	Virgin_vs_E18	CA3	0.177173
0.0199224	0.0872242	1	2610005L07Rik	Virgin_vs_E18	CA3	0.177497
0.0199636	0.210147	1	Miat	Virgin_vs_E18	CA3	0.177625
0.020014	0.258301	1	Ccdc125	Virgin_vs_E18	CA3	0.177833
0.0200909	-0.197724	1	6330403K07Rik	Virgin_vs_E18	CA3	0.178276
0.020217	0.0143237	1	Myt1l	Virgin_vs_E18	CA3	0.179154
0.0202664	0.25194	1	Cdkl3	Virgin_vs_E18	CA3	0.179344
0.0202928	-0.267372	1	Ak1	Virgin_vs_E18	CA3	0.179344
0.020391	0.230355	1	Cux1	Virgin_vs_E18	CA3	0.179797
0.0204205	-0.083959	1	Hsp90aa1	Virgin_vs_E18	CA3	0.179797
0.0204259	0.110905	1	Nnat	Virgin_vs_E18	CA3	0.179797
0.0204604	0.132189	1	Gm44096	Virgin_vs_E18	CA3	0.17986
0.02058	-0.270359	1	Nefl	Virgin_vs_E18	CA3	0.180671
0.0206528	-0.306931	1	Dr1	Virgin_vs_E18	CA3	0.181069
0.0207803	-0.24831	1	Rhob	Virgin_vs_E18	CA3	0.181945
0.0208639	0.0911868	1	Dnajb14	Virgin_vs_E18	CA3	0.182434
0.0208989	-0.341423	1	Prkag2	Virgin_vs_E18	CA3	0.182499
0.0210224	-0.272672	1	Hint1	Virgin_vs_E18	CA3	0.183256
0.0210615	0.231012	1	Tbc1d24	Virgin_vs_E18	CA3	0.183256
0.0210904	0.156678	1	Ints10	Virgin_vs_E18	CA3	0.183256
0.0210968	-0.294404	1	Nt5c3	Virgin_vs_E18	CA3	0.183256
0.0211838	0.180209	1	Abcd4	Virgin_vs_E18	CA3	0.183769
0.0213017	0.179719	1	Pirt	Virgin_vs_E18	CA3	0.184349
0.0213065	-0.277858	1	Dtd1	Virgin_vs_E18	CA3	0.184349
0.0214312	0.18356	1	Utp11l	Virgin_vs_E18	CA3	0.185052
0.0214721	0.192591	1	4930447C04Rik	Virgin_vs_E18	CA3	0.185052
0.0214755	0.0269322	1	Fbxo32	Virgin_vs_E18	CA3	0.185052
0.0215077	0.130504	1	Usp33	Virgin_vs_E18	CA3	0.185052
0.0215281	0.223319	1	Pecam1	Virgin_vs_E18	CA3	0.185052
0.0215684	0.132059	1	Gm16279	Virgin_vs_E18	CA3	0.185157
0.0216154	0.248608	1	Fsd1l	Virgin_vs_E18	CA3	0.185319
0.0216458	0.191588	1	Cnih2	Virgin_vs_E18	CA3	0.185339
0.0217109	-0.270471	1	Zfp385b	Virgin_vs_E18	CA3	0.185493
0.0217723	-0.208738	1	Neurod6	Virgin_vs_E18	CA3	0.185493
0.0217787	0.0631322	1	Slc26a4	Virgin_vs_E18	CA3	0.185493
0.0218447	0.193193	1	Cyp2e1	Virgin_vs_E18	CA3	0.185493
0.0218455	-0.282105	1	Map2k4	Virgin_vs_E18	CA3	0.185493
0.0218799	-0.101691	1	Ncdn	Virgin_vs_E18	CA3	0.185493
0.0218806	0.269364	1	Rspry1	Virgin_vs_E18	CA3	0.185493
0.0218889	-0.134003	1	Hnrnpk	Virgin_vs_E18	CA3	0.185493
0.0219986	-0.290043	1	Vti1b	Virgin_vs_E18	CA3	0.186183
0.0220471	0.19578	1	Gm11033	Virgin_vs_E18	CA3	0.186307
0.0220697	0.123426	1	Ikbip	Virgin_vs_E18	CA3	0.186307
0.0221266	0.22682	1	Gm37214	Virgin_vs_E18	CA3	0.186549
0.0221664	0.137619	1	Lztfl1	Virgin_vs_E18	CA3	0.186645
0.0222426	0.0844839	1	Mdga2	Virgin_vs_E18	CA3	0.187048
0.0223437	0.211326	1	Wipi1	Virgin_vs_E18	CA3	0.187659
0.0224753	0.131572	1	Gpatch8	Virgin_vs_E18	CA3	0.188349
0.022483	0.232852	1	Pnn	Virgin_vs_E18	CA3	0.188349
0.0226761	-0.30785	1	Chp1	Virgin_vs_E18	CA3	0.189725
0.0227563	0.260113	1	Dock11	Virgin_vs_E18	CA3	0.190027
0.0227698	0.244967	1	Zc3hc1	Virgin_vs_E18	CA3	0.190027
0.0228202	0.223896	1	Mkln1	Virgin_vs_E18	CA3	0.190206
0.0229929	0.162972	1	Lrp1b	Virgin_vs_E18	CA3	0.191121
0.0230037	0.104854	1	Usp10	Virgin_vs_E18	CA3	0.191121
0.0230399	0.00446661	1	Omg	Virgin_vs_E18	CA3	0.191121
0.0230458	0.165556	1	Wdr91	Virgin_vs_E18	CA3	0.191121
0.023097	-0.302034	1	Cct2	Virgin_vs_E18	CA3	0.191305
0.0231268	0.0289066	1	Glt8d1	Virgin_vs_E18	CA3	0.191311
0.0231679	-0.326851	1	Dnajc7	Virgin_vs_E18	CA3	0.191411
0.0234271	-0.27089	1	Dnm1l	Virgin_vs_E18	CA3	0.193298
0.0234852	-0.228666	1	Zc2hc1a	Virgin_vs_E18	CA3	0.193298
0.0235004	-0.205162	1	Gpcpd1	Virgin_vs_E18	CA3	0.193298
0.0235247	0.217126	1	Fip1l1	Virgin_vs_E18	CA3	0.193298
0.0236022	-0.230205	1	Eif3b	Virgin_vs_E18	CA3	0.193298
0.0236252	0.225452	1	Dvl2	Virgin_vs_E18	CA3	0.193298
0.023649	0.0329554	1	Nlgn1	Virgin_vs_E18	CA3	0.193298
0.0236502	-0.227985	1	Dlg2	Virgin_vs_E18	CA3	0.193298
0.0236601	0.230732	1	Kif11	Virgin_vs_E18	CA3	0.193298
0.0237481	0.0558964	1	Ttc14	Virgin_vs_E18	CA3	0.193777
0.0238066	0.307251	1	Pxdn	Virgin_vs_E18	CA3	0.193915
0.0238239	-0.289017	1	Cpeb4	Virgin_vs_E18	CA3	0.193915
0.0238701	-0.266425	1	Kras	Virgin_vs_E18	CA3	0.193949
0.0238869	-0.166968	1	Pak3	Virgin_vs_E18	CA3	0.193949
0.0239462	0.208315	1	Socs7	Virgin_vs_E18	CA3	0.194191
0.0240761	-0.256314	1	Fam219a	Virgin_vs_E18	CA3	0.194811
0.0240818	-0.233243	1	Serinc3	Virgin_vs_E18	CA3	0.194811
0.024115	0.235252	1	Uba6	Virgin_vs_E18	CA3	0.194841
0.0242427	0.138126	1	Kcnn2	Virgin_vs_E18	CA3	0.195633
0.0242953	0.118716	1	Gfm2	Virgin_vs_E18	CA3	0.195785
0.0243209	0.168499	1	Mfsd10	Virgin_vs_E18	CA3	0.195785
0.0243816	0.225082	1	Tnpo3	Virgin_vs_E18	CA3	0.196034
0.0244994	0.197763	1	Stat1	Virgin_vs_E18	CA3	0.196715
0.0245453	0.0943417	1	Tbc1d20	Virgin_vs_E18	CA3	0.196715
0.0246162	0.147604	1	Ubr2	Virgin_vs_E18	CA3	0.196715
0.0246411	-0.099838	1	Dclk2	Virgin_vs_E18	CA3	0.196715
0.0246746	-0.205505	1	Uggt2	Virgin_vs_E18	CA3	0.196715
0.0246926	0.142925	1	Mid2	Virgin_vs_E18	CA3	0.196715
0.0247006	-0.160802	1	Ank2	Virgin_vs_E18	CA3	0.196715
0.0247217	-0.105115	1	Lgr4	Virgin_vs_E18	CA3	0.196715
0.0247348	0.0391288	1	Zfp40	Virgin_vs_E18	CA3	0.196715
0.0248265	0.0210328	1	Satb1	Virgin_vs_E18	CA3	0.197206
0.0248933	0.0721691	1	Otub2	Virgin_vs_E18	CA3	0.197499
0.0251929	-0.195305	1	Nrip3	Virgin_vs_E18	CA3	0.19943
0.0251972	-0.207346	1	Astn1	Virgin_vs_E18	CA3	0.19943
0.0252781	0.250477	1	Tanc2	Virgin_vs_E18	CA3	0.19972
0.0252944	-0.256475	1	Fam13a	Virgin_vs_E18	CA3	0.19972
0.0253328	0.0834023	1	Efcab14	Virgin_vs_E18	CA3	0.199784
0.0254371	0.266724	1	Zfhx2	Virgin_vs_E18	CA3	0.200367
0.025518	0.0703476	1	Paox	Virgin_vs_E18	CA3	0.200671
0.0255391	0.0549007	1	Fam126b	Virgin_vs_E18	CA3	0.200671
0.0255671	-0.27356	1	Trim32	Virgin_vs_E18	CA3	0.200671
0.0256185	-0.230244	1	Pdzd4	Virgin_vs_E18	CA3	0.200836
0.0257261	0.0300643	1	Olfr56	Virgin_vs_E18	CA3	0.20111
0.0257403	0.236775	1	Sik2	Virgin_vs_E18	CA3	0.20111
0.025745	-0.228434	1	Ythdf3	Virgin_vs_E18	CA3	0.20111
0.0257901	-0.0380705	1	Mef2a	Virgin_vs_E18	CA3	0.201224
0.0260479	0.25348	1	Afg3l2	Virgin_vs_E18	CA3	0.202995
0.0261465	-0.141375	1	Ppia	Virgin_vs_E18	CA3	0.203254
0.0261643	-0.131359	1	Taok2	Virgin_vs_E18	CA3	0.203254
0.0261743	0.19223	1	Ecd	Virgin_vs_E18	CA3	0.203254
0.0262044	0.26105	1	Ly6h	Virgin_vs_E18	CA3	0.203254
0.0262647	-0.137982	1	Fam171b	Virgin_vs_E18	CA3	0.203482
0.0263182	0.0995306	1	Lsg1	Virgin_vs_E18	CA3	0.203657
0.0263679	0.287995	1	Nip7	Virgin_vs_E18	CA3	0.203803
0.02649	-0.0871329	1	Arl2bp	Virgin_vs_E18	CA3	0.204371
0.0265282	-0.293048	1	Rfk	Virgin_vs_E18	CA3	0.204371
0.0265345	-0.250381	1	Klhl9	Virgin_vs_E18	CA3	0.204371
0.0266639	0.234769	1	Rev3l	Virgin_vs_E18	CA3	0.205129
0.0267946	-0.0627192	1	Brca2	Virgin_vs_E18	CA3	0.205894
0.0269143	0.15204	1	Emc3	Virgin_vs_E18	CA3	0.206573
0.026952	0.104584	1	Zhx1	Virgin_vs_E18	CA3	0.206622
0.0269911	-0.300399	1	Ppp1r1a	Virgin_vs_E18	CA3	0.206681
0.0271119	-0.262864	1	Rnps1	Virgin_vs_E18	CA3	0.207337
0.0271397	-0.0291032	1	Mark1	Virgin_vs_E18	CA3	0.207337
0.0272639	-0.219396	1	Ralbp1	Virgin_vs_E18	CA3	0.208045
0.0274013	0.247439	1	Erdr1	Virgin_vs_E18	CA3	0.208738
0.0274365	0.0317075	1	Clip4	Virgin_vs_E18	CA3	0.208738
0.0274497	0.248737	1	Tspan15	Virgin_vs_E18	CA3	0.208738
0.0275135	-0.143654	1	Igsf9	Virgin_vs_E18	CA3	0.208982
0.0276977	0.24464	1	Rpp21	Virgin_vs_E18	CA3	0.210139
0.0277975	-0.25254	1	Bag1	Virgin_vs_E18	CA3	0.210304
0.0278057	0.0348153	1	Tmem181a	Virgin_vs_E18	CA3	0.210304
0.0278152	0.245219	1	Gm26822	Virgin_vs_E18	CA3	0.210304
0.0278925	-0.248137	1	Cul3	Virgin_vs_E18	CA3	0.210437
0.0278965	0.231187	1	Acrv1	Virgin_vs_E18	CA3	0.210437
0.0279778	0.222766	1	Scn1a	Virgin_vs_E18	CA3	0.210809
0.0280114	-0.259375	1	Ccdc32	Virgin_vs_E18	CA3	0.210821
0.0281081	0.146269	1	Plekhg3	Virgin_vs_E18	CA3	0.211247
0.0281321	0.270699	1	Klhl12	Virgin_vs_E18	CA3	0.211247
0.0281646	0.0687812	1	Gpr161	Virgin_vs_E18	CA3	0.21125
0.0282253	0.220325	1	Gm26648	Virgin_vs_E18	CA3	0.211465
0.028371	-0.122596	1	Arfgap2	Virgin_vs_E18	CA3	0.212152
0.0283814	-0.163797	1	Camk2a	Virgin_vs_E18	CA3	0.212152
0.0284656	0.283891	1	Zfp286	Virgin_vs_E18	CA3	0.212502
0.0284926	-0.177783	1	Akap8l	Virgin_vs_E18	CA3	0.212502
0.0286225	0.193394	1	Npc1	Virgin_vs_E18	CA3	0.213225
0.0286805	0.263341	1	2410018L13Rik	Virgin_vs_E18	CA3	0.213225
0.0286865	0.211201	1	Ankfy1	Virgin_vs_E18	CA3	0.213225
0.0287195	0.167818	1	Stx16	Virgin_vs_E18	CA3	0.213229
0.0287669	0.014732	1	Rbfox3	Virgin_vs_E18	CA3	0.213341
0.0288247	0.236668	1	Dpm1	Virgin_vs_E18	CA3	0.213529
0.0290854	0.157651	1	Lrp1	Virgin_vs_E18	CA3	0.21501
0.0291031	-0.240058	1	Snap91	Virgin_vs_E18	CA3	0.21501
0.0291224	0.259284	1	Gripap1	Virgin_vs_E18	CA3	0.21501
0.0294084	-0.281914	1	Mtfp1	Virgin_vs_E18	CA3	0.216473
0.0294724	0.219684	1	Pex13	Virgin_vs_E18	CA3	0.216473
0.0294755	0.199404	1	R3hdm1	Virgin_vs_E18	CA3	0.216473
0.0295011	-0.224888	1	Gcsh	Virgin_vs_E18	CA3	0.216473
0.0295256	0.134774	1	Brd3	Virgin_vs_E18	CA3	0.216473
0.0295344	0.206691	1	Kif18a	Virgin_vs_E18	CA3	0.216473
0.0295589	-0.20411	1	Utp6	Virgin_vs_E18	CA3	0.216473
0.0295833	-0.210134	1	Elmod1	Virgin_vs_E18	CA3	0.216473
0.0297654	0.191657	1	Tmed10	Virgin_vs_E18	CA3	0.217243
0.0297696	0.00783021	1	Hsd3b2	Virgin_vs_E18	CA3	0.217243
0.0297962	-0.270607	1	2900011O08Rik	Virgin_vs_E18	CA3	0.217243
0.029895	-0.287104	1	Rnf170	Virgin_vs_E18	CA3	0.217243
0.0299077	-0.213179	1	Arf1	Virgin_vs_E18	CA3	0.217243
0.0299087	-0.24603	1	Srp68	Virgin_vs_E18	CA3	0.217243
0.0299191	-0.153563	1	Smarca4	Virgin_vs_E18	CA3	0.217243
0.0299736	-0.24423	1	Scamp5	Virgin_vs_E18	CA3	0.217399
0.0300547	-0.198347	1	Pgam1	Virgin_vs_E18	CA3	0.217533
0.030058	-0.323224	1	Bcl11b	Virgin_vs_E18	CA3	0.217533
0.0300934	0.245641	1	Wdr34	Virgin_vs_E18	CA3	0.21755
0.0305546	-0.152125	1	Slmap	Virgin_vs_E18	CA3	0.220642
0.0307099	-0.33605	1	Col4a3bp	Virgin_vs_E18	CA3	0.221521
0.0307566	-0.205013	1	Tspyl4	Virgin_vs_E18	CA3	0.221554
0.0307817	0.249008	1	Rep15	Virgin_vs_E18	CA3	0.221554
0.03097	0.24093	1	Nudcd1	Virgin_vs_E18	CA3	0.222667
0.0310285	-0.0179747	1	Ankrd17	Virgin_vs_E18	CA3	0.222844
0.0311205	-0.215075	1	Sort1	Virgin_vs_E18	CA3	0.223262
0.0311987	0.217303	1	Prkdc	Virgin_vs_E18	CA3	0.223579
0.0312683	0.206698	1	4732419C18Rik	Virgin_vs_E18	CA3	0.223835
0.0313415	-0.149947	1	Stxbp5l	Virgin_vs_E18	CA3	0.224116
0.0314217	-0.172631	1	Gabarapl1	Virgin_vs_E18	CA3	0.224446
0.0315076	-0.271814	1	Epha5	Virgin_vs_E18	CA3	0.224816
0.0315521	0.139846	1	BC005561	Virgin_vs_E18	CA3	0.22483
0.0315778	0.125584	1	Mast4	Virgin_vs_E18	CA3	0.22483
0.0316604	0.300872	1	Gcfc2	Virgin_vs_E18	CA3	0.225019
0.0316727	0.292125	1	Ak2	Virgin_vs_E18	CA3	0.225019
0.0317334	0.31567	1	Ccar1	Virgin_vs_E18	CA3	0.225208
0.0318216	-0.00543146	1	Ddx17	Virgin_vs_E18	CA3	0.225591
0.0318864	0.195604	1	Cmtm4	Virgin_vs_E18	CA3	0.225808
0.0320117	0.00571346	1	Rcor1	Virgin_vs_E18	CA3	0.226379
0.0320361	0.288947	1	Nae1	Virgin_vs_E18	CA3	0.226379
0.032079	0.208696	1	Tprkb	Virgin_vs_E18	CA3	0.226379
0.0321586	0.095937	1	Gtdc1	Virgin_vs_E18	CA3	0.226379
0.0321961	-0.262412	1	Magee1	Virgin_vs_E18	CA3	0.226379
0.0322028	-0.227518	1	Hspa8	Virgin_vs_E18	CA3	0.226379
0.0322566	0.114425	1	Maoa	Virgin_vs_E18	CA3	0.226379
0.0322719	0.227516	1	Cep83	Virgin_vs_E18	CA3	0.226379
0.0322761	-0.162957	1	Pdap1	Virgin_vs_E18	CA3	0.226379
0.0325763	0.150344	1	1810037I17Rik	Virgin_vs_E18	CA3	0.227778
0.032604	-0.23646	1	Rprd1a	Virgin_vs_E18	CA3	0.227778
0.0326044	-0.0837641	1	Dnajb4	Virgin_vs_E18	CA3	0.227778
0.0326138	0.174973	1	Ccbl2	Virgin_vs_E18	CA3	0.227778
0.03267	-0.324651	1	Grina	Virgin_vs_E18	CA3	0.227929
0.0327344	-0.243988	1	Ppp1r10	Virgin_vs_E18	CA3	0.228137
0.0327838	0.267423	1	A130010J15Rik	Virgin_vs_E18	CA3	0.22824
0.033023	-0.244932	1	Eif1ad	Virgin_vs_E18	CA3	0.229663
0.033076	-0.226415	1	Tomm20	Virgin_vs_E18	CA3	0.22979
0.0331226	0.0201137	1	4933427D14Rik	Virgin_vs_E18	CA3	0.229871
0.0332844	-0.220961	1	Gm10419	Virgin_vs_E18	CA3	0.230386
0.0332917	-0.216531	1	Armc1	Virgin_vs_E18	CA3	0.230386
0.0333016	-0.236804	1	Fem1b	Virgin_vs_E18	CA3	0.230386
0.0333616	0.199948	1	2300009A05Rik	Virgin_vs_E18	CA3	0.230558
0.0335655	0.20086	1	Sgsm3	Virgin_vs_E18	CA3	0.23165
0.0336075	-0.29279	1	mt-Co3	Virgin_vs_E18	CA3	0.23165
0.0336249	0.0806963	1	Nav2	Virgin_vs_E18	CA3	0.23165
0.0336771	-0.261466	1	Mdh2	Virgin_vs_E18	CA3	0.231767
0.0337427	0.0175166	1	Insig2	Virgin_vs_E18	CA3	0.23185
0.0337594	-0.0776311	1	Atxn3	Virgin_vs_E18	CA3	0.23185
0.0338265	-0.207127	1	Ghitm	Virgin_vs_E18	CA3	0.232069
0.0339095	0.151729	1	Pkd2	Virgin_vs_E18	CA3	0.232397
0.0341336	0.267949	1	Pcgf3	Virgin_vs_E18	CA3	0.233555
0.0341494	-0.105598	1	Madd	Virgin_vs_E18	CA3	0.233555
0.0342316	0.245921	1	Lamtor3	Virgin_vs_E18	CA3	0.233875
0.0346421	-0.209745	1	Aes	Virgin_vs_E18	CA3	0.236434
0.0347337	0.268346	1	Snhg4	Virgin_vs_E18	CA3	0.236814
0.0348463	0.151137	1	Rasa4	Virgin_vs_E18	CA3	0.236849
0.0348473	0.145347	1	Wwox	Virgin_vs_E18	CA3	0.236849
0.0349348	-0.268568	1	Hnrnpab	Virgin_vs_E18	CA3	0.236849
0.0349698	0.0894977	1	Dennd6a	Virgin_vs_E18	CA3	0.236849
0.0349707	0.229742	1	Atxn7	Virgin_vs_E18	CA3	0.236849
0.0349798	-0.0325742	1	Mecp2	Virgin_vs_E18	CA3	0.236849
0.0350238	-0.104594	1	Fbxl3	Virgin_vs_E18	CA3	0.236849
0.0350262	-0.263189	1	Ythdf1	Virgin_vs_E18	CA3	0.236849
0.0350692	0.226053	1	Reps1	Virgin_vs_E18	CA3	0.236897
0.0354072	-0.193356	1	Rragd	Virgin_vs_E18	CA3	0.238332
0.0354108	0.173442	1	Rrnad1	Virgin_vs_E18	CA3	0.238332
0.0354193	0.187311	1	Aebp2	Virgin_vs_E18	CA3	0.238332
0.0354611	0.209091	1	9530026P05Rik	Virgin_vs_E18	CA3	0.238332
0.0354654	0.202808	1	Mical3	Virgin_vs_E18	CA3	0.238332
0.0355241	-0.262259	1	St8sia3	Virgin_vs_E18	CA3	0.238332
0.0355346	-0.212676	1	Ppp2ca	Virgin_vs_E18	CA3	0.238332
0.0357641	0.121726	1	Rab14	Virgin_vs_E18	CA3	0.239627
0.0358574	0.252613	1	Ptprr	Virgin_vs_E18	CA3	0.239851
0.0358703	-0.184924	1	Luc7l	Virgin_vs_E18	CA3	0.239851
0.0360256	0.198688	1	Dync2h1	Virgin_vs_E18	CA3	0.240019
0.0360441	-0.332637	1	Scrn3	Virgin_vs_E18	CA3	0.240019
0.0360623	-0.336438	1	Dip2c	Virgin_vs_E18	CA3	0.240019
0.0360843	-0.00391686	1	Smarcd2	Virgin_vs_E18	CA3	0.240019
0.0361444	-0.262831	1	Rab3c	Virgin_vs_E18	CA3	0.240019
0.0361495	0.123532	1	Nfatc2	Virgin_vs_E18	CA3	0.240019
0.0361586	0.112789	1	Casc4	Virgin_vs_E18	CA3	0.240019
0.0361867	-0.246581	1	Otub1	Virgin_vs_E18	CA3	0.240019
0.0363156	0.213358	1	Gapvd1	Virgin_vs_E18	CA3	0.240556
0.0363719	0.166736	1	Sox11	Virgin_vs_E18	CA3	0.240556
0.0363945	0.259482	1	Inpp5e	Virgin_vs_E18	CA3	0.240556
0.0364136	-0.265454	1	Ahsa1	Virgin_vs_E18	CA3	0.240556
0.0365962	0.194256	1	Stx1b	Virgin_vs_E18	CA3	0.24152
0.0366649	-0.258451	1	Epb41l3	Virgin_vs_E18	CA3	0.241731
0.0368925	0.210399	1	Dlg5	Virgin_vs_E18	CA3	0.242418
0.0369127	-0.279365	1	Nap1l1	Virgin_vs_E18	CA3	0.242418
0.0369146	-0.323262	1	Frmpd4	Virgin_vs_E18	CA3	0.242418
0.0369469	0.224313	1	Dzank1	Virgin_vs_E18	CA3	0.242418
0.0369542	0.267305	1	Igf1r	Virgin_vs_E18	CA3	0.242418
0.0370443	0.217274	1	Irak1	Virgin_vs_E18	CA3	0.242418
0.03708	0.0846705	1	Rpap1	Virgin_vs_E18	CA3	0.242418
0.0370853	-0.228587	1	Atp6v0d1	Virgin_vs_E18	CA3	0.242418
0.0370998	-0.209683	1	Pkia	Virgin_vs_E18	CA3	0.242418
0.0371915	0.1941	1	Senp8	Virgin_vs_E18	CA3	0.242776
0.0373239	0.128256	1	Onecut2	Virgin_vs_E18	CA3	0.243399
0.0374944	0.0964252	1	Sec61a2	Virgin_vs_E18	CA3	0.244164
0.0375638	0.190938	1	Gm43735	Virgin_vs_E18	CA3	0.244164
0.0375778	-0.206535	1	Prickle1	Virgin_vs_E18	CA3	0.244164
0.0375894	-0.192569	1	Rps19	Virgin_vs_E18	CA3	0.244164
0.037717	-0.134273	1	Fam199x	Virgin_vs_E18	CA3	0.244397
0.0377202	0.218247	1	Tyms	Virgin_vs_E18	CA3	0.244397
0.0377364	-0.0566344	1	Arfgef1	Virgin_vs_E18	CA3	0.244397
0.0378357	0.180572	1	L1cam	Virgin_vs_E18	CA3	0.244428
0.0378445	-0.181895	1	Rpl21	Virgin_vs_E18	CA3	0.244428
0.0378524	-0.0710362	1	Sumo1	Virgin_vs_E18	CA3	0.244428
0.0379483	0.0522655	1	Gria2	Virgin_vs_E18	CA3	0.244541
0.0379652	0.278721	1	Tmtc3	Virgin_vs_E18	CA3	0.244541
0.0379843	-0.258246	1	Igf2r	Virgin_vs_E18	CA3	0.244541
0.0380182	-0.312413	1	Kbtbd7	Virgin_vs_E18	CA3	0.244541
0.0382023	0.0921034	1	Rpl23	Virgin_vs_E18	CA3	0.245334
0.038216	0.198324	1	Eif2ak1	Virgin_vs_E18	CA3	0.245334
0.038431	-0.21684	1	Gpd1	Virgin_vs_E18	CA3	0.246474
0.0384788	0.191349	1	Them4	Virgin_vs_E18	CA3	0.246541
0.038545	0.191722	1	Ncam1	Virgin_vs_E18	CA3	0.246662
0.0385726	0.0479901	1	Cdc73	Virgin_vs_E18	CA3	0.246662
0.0386721	-0.142341	1	Sltm	Virgin_vs_E18	CA3	0.247059
0.03874	-0.135983	1	Cacna2d1	Virgin_vs_E18	CA3	0.247253
0.0387914	-0.230361	1	Etv1	Virgin_vs_E18	CA3	0.247264
0.0388388	0.180307	1	Cpsf6	Virgin_vs_E18	CA3	0.247264
0.0388541	0.127592	1	Gtpbp6	Virgin_vs_E18	CA3	0.247264
0.0390647	-0.0600089	1	Ube2e1	Virgin_vs_E18	CA3	0.248364
0.0391424	0.191589	1	Iffo1	Virgin_vs_E18	CA3	0.248618
0.0393036	-0.00905599	1	Mpp6	Virgin_vs_E18	CA3	0.249402
0.0393633	0.232856	1	Pdlim7	Virgin_vs_E18	CA3	0.24954
0.0395075	0.107514	1	Gm16685	Virgin_vs_E18	CA3	0.249976
0.0395079	-0.0456553	1	Slc1a2	Virgin_vs_E18	CA3	0.249976
0.0398562	-0.227688	1	Sh3bgrl	Virgin_vs_E18	CA3	0.251736
0.0399067	-0.0128352	1	Tpp1	Virgin_vs_E18	CA3	0.251736
0.0399232	-0.226456	1	1700020I14Rik	Virgin_vs_E18	CA3	0.251736
0.0399524	0.00489867	1	Asb6	Virgin_vs_E18	CA3	0.251736
0.0399768	0.0995471	1	Cxcr2	Virgin_vs_E18	CA3	0.251736
0.0400616	-0.231471	1	Pcmt1	Virgin_vs_E18	CA3	0.251948
0.040087	-0.240398	1	Dnajc6	Virgin_vs_E18	CA3	0.251948
0.0402668	0.175622	1	H3f3a	Virgin_vs_E18	CA3	0.252311
0.0402674	0.057528	1	Tbp	Virgin_vs_E18	CA3	0.252311
0.0403068	-0.266517	1	Fam136a	Virgin_vs_E18	CA3	0.252311
0.0403293	0.176841	1	Rnf123	Virgin_vs_E18	CA3	0.252311
0.0403361	0.224149	1	Stk38	Virgin_vs_E18	CA3	0.252311
0.0404241	0.178156	1	E230016K23Rik	Virgin_vs_E18	CA3	0.252622
0.0405442	0.207545	1	Rps28	Virgin_vs_E18	CA3	0.253133
0.0408315	0.215251	1	1700095J07Rik	Virgin_vs_E18	CA3	0.254299
0.0408901	-0.031575	1	4933431E20Rik	Virgin_vs_E18	CA3	0.254299
0.0409177	0.207987	1	Plch2	Virgin_vs_E18	CA3	0.254299
0.0409281	-0.187914	1	Hectd2	Virgin_vs_E18	CA3	0.254299
0.0409822	0.20822	1	Letm1	Virgin_vs_E18	CA3	0.254299
0.0409846	0.169244	1	Decr2	Virgin_vs_E18	CA3	0.254299
0.0410011	-0.193272	1	Kcnq3	Virgin_vs_E18	CA3	0.254299
0.0411268	0.163699	1	Mga	Virgin_vs_E18	CA3	0.254839
0.0411844	-0.190512	1	B3galnt2	Virgin_vs_E18	CA3	0.254957
0.0412375	0.189171	1	Slc2a3	Virgin_vs_E18	CA3	0.255046
0.041375	0.0043355	1	Camkk1	Virgin_vs_E18	CA3	0.255373
0.0413784	0.0431525	1	Ago2	Virgin_vs_E18	CA3	0.255373
0.041439	0.223129	1	Aph1b	Virgin_vs_E18	CA3	0.255373
0.0414453	0.049154	1	Paxbp1	Virgin_vs_E18	CA3	0.255373
0.0416405	-0.242906	1	Robo1	Virgin_vs_E18	CA3	0.256176
0.0416798	0.210373	1	Nlrc3	Virgin_vs_E18	CA3	0.256176
0.0416923	0.125734	1	Rpl10	Virgin_vs_E18	CA3	0.256176
0.041753	0.157106	1	Trim26	Virgin_vs_E18	CA3	0.256311
0.0420283	-0.209727	1	6430548M08Rik	Virgin_vs_E18	CA3	0.257625
0.042061	0.0524006	1	Aifm3	Virgin_vs_E18	CA3	0.257625
0.0420844	0.247038	1	Lasp1	Virgin_vs_E18	CA3	0.257625
0.0422696	0.00940474	1	Fam92a	Virgin_vs_E18	CA3	0.258519
0.0424648	0.138307	1	Neurl1b	Virgin_vs_E18	CA3	0.259453
0.0425251	-0.176892	1	Plxna4	Virgin_vs_E18	CA3	0.259453
0.0425403	0.207496	1	Nmd3	Virgin_vs_E18	CA3	0.259453
0.0426734	0.144537	1	Srsf11	Virgin_vs_E18	CA3	0.260024
0.0428303	0.238064	1	4933434E20Rik	Virgin_vs_E18	CA3	0.260739
0.0430143	0.0719735	1	Uvssa	Virgin_vs_E18	CA3	0.261296
0.0430235	0.304895	1	Aldh6a1	Virgin_vs_E18	CA3	0.261296
0.0430408	0.099887	1	Gnai2	Virgin_vs_E18	CA3	0.261296
0.0431896	0.129541	1	Col4a1	Virgin_vs_E18	CA3	0.261959
0.0433173	-0.164632	1	Xpo6	Virgin_vs_E18	CA3	0.262492
0.0433922	-0.245044	1	Pvt1	Virgin_vs_E18	CA3	0.262496
0.0434205	0.010072	1	2810429I04Rik	Virgin_vs_E18	CA3	0.262496
0.0434984	-0.284266	1	Ubc	Virgin_vs_E18	CA3	0.262496
0.0435029	0.225357	1	Rab27a	Virgin_vs_E18	CA3	0.262496
0.0435171	0.1918	1	Slc12a6	Virgin_vs_E18	CA3	0.262496
0.0435689	0.102022	1	Fkbp5	Virgin_vs_E18	CA3	0.262568
0.0438053	0.198867	1	Stam2	Virgin_vs_E18	CA3	0.263752
0.0438917	0.251814	1	Sec24b	Virgin_vs_E18	CA3	0.264031
0.0440183	0.236625	1	Ago3	Virgin_vs_E18	CA3	0.264551
0.0441726	0.011887	1	Armt1	Virgin_vs_E18	CA3	0.265237
0.0442357	0.205009	1	Mvp	Virgin_vs_E18	CA3	0.265374
0.0444077	-0.281125	1	Kcnd2	Virgin_vs_E18	CA3	0.265747
0.0444376	0.0587934	1	Hcn1	Virgin_vs_E18	CA3	0.265747
0.0444542	0.245785	1	Pcbp2	Virgin_vs_E18	CA3	0.265747
0.0445088	0.237068	1	St6galnac6	Virgin_vs_E18	CA3	0.265747
0.0445193	0.251527	1	Snx24	Virgin_vs_E18	CA3	0.265747
0.0445576	0.160657	1	Adrbk2	Virgin_vs_E18	CA3	0.265747
0.0445964	0.28844	1	Arhgef26	Virgin_vs_E18	CA3	0.265747
0.0446203	0.127141	1	Cdk7	Virgin_vs_E18	CA3	0.265747
0.0448585	0.160642	1	Yipf5	Virgin_vs_E18	CA3	0.266917
0.0448978	-0.177807	1	Ctcf	Virgin_vs_E18	CA3	0.266917
0.0449386	0.203274	1	Pag1	Virgin_vs_E18	CA3	0.266919
0.0450376	-0.255497	1	Ola1	Virgin_vs_E18	CA3	0.267012
0.0450586	0.211085	1	Mfsd6	Virgin_vs_E18	CA3	0.267012
0.0451327	0.155168	1	March1	Virgin_vs_E18	CA3	0.267012
0.0452352	0.172094	1	Anapc5	Virgin_vs_E18	CA3	0.267012
0.0452369	0.08399	1	Csrp1	Virgin_vs_E18	CA3	0.267012
0.0452593	0.188876	1	Cr1l	Virgin_vs_E18	CA3	0.267012
0.045272	0.202574	1	Rsbn1l	Virgin_vs_E18	CA3	0.267012
0.0452783	0.285432	1	4930430F08Rik	Virgin_vs_E18	CA3	0.267012
0.045433	-0.245151	1	Tubb3	Virgin_vs_E18	CA3	0.267685
0.0454906	0.241838	1	Ctsd	Virgin_vs_E18	CA3	0.267786
0.0456103	0.222261	1	Zic1	Virgin_vs_E18	CA3	0.268251
0.0457839	-0.187122	1	Romo1	Virgin_vs_E18	CA3	0.268808
0.0458115	0.176067	1	5330434G04Rik	Virgin_vs_E18	CA3	0.268808
0.0458274	0.167882	1	Mysm1	Virgin_vs_E18	CA3	0.268808
0.0459074	0.180706	1	Tmem80	Virgin_vs_E18	CA3	0.269038
0.045989	-0.181244	1	Tmod2	Virgin_vs_E18	CA3	0.269277
0.0461614	0.141195	1	Slc5a4b	Virgin_vs_E18	CA3	0.270046
0.046292	-0.172898	1	B930041F14Rik	Virgin_vs_E18	CA3	0.270195
0.0462939	-0.0952285	1	Hnrnpll	Virgin_vs_E18	CA3	0.270195
0.0463098	0.185701	1	Wash1	Virgin_vs_E18	CA3	0.270195
0.0464057	-0.190833	1	Alg6	Virgin_vs_E18	CA3	0.270515
0.046532	0.221931	1	BC039771	Virgin_vs_E18	CA3	0.27091
0.0465556	0.261012	1	Supt20	Virgin_vs_E18	CA3	0.27091
0.0466738	0.182877	1	Scarb1	Virgin_vs_E18	CA3	0.271358
0.0467445	0.0856289	1	Ttl	Virgin_vs_E18	CA3	0.271431
0.0467687	-0.239515	1	Chtop	Virgin_vs_E18	CA3	0.271431
0.0471025	0.0389486	1	Clcn3	Virgin_vs_E18	CA3	0.273128
0.0471966	-0.174468	1	Exoc2	Virgin_vs_E18	CA3	0.273433
0.0473222	-0.201726	1	Fbxo27	Virgin_vs_E18	CA3	0.27392
0.0473755	0.208095	1	Vps50	Virgin_vs_E18	CA3	0.273946
0.0474588	-0.236796	1	Bin1	Virgin_vs_E18	CA3	0.273946
0.0474855	-0.00824462	1	Brpf1	Virgin_vs_E18	CA3	0.273946
0.0474928	0.044796	1	Ube2v1	Virgin_vs_E18	CA3	0.273946
0.0475757	-0.155779	1	Dnajb12	Virgin_vs_E18	CA3	0.274184
0.0476894	0.155661	1	Cd300lf	Virgin_vs_E18	CA3	0.274381
0.0476931	0.212208	1	Sar1b	Virgin_vs_E18	CA3	0.274381
0.0477861	0.210711	1	Lrp8	Virgin_vs_E18	CA3	0.274617
0.0478175	-0.225447	1	Cox5a	Virgin_vs_E18	CA3	0.274617
0.0478752	-0.211997	1	Got1	Virgin_vs_E18	CA3	0.274709
0.0480916	0.162392	1	Med16	Virgin_vs_E18	CA3	0.275594
0.048113	-0.221859	1	Atp6ap1	Virgin_vs_E18	CA3	0.275594
0.0483642	0.187461	1	Gabpa	Virgin_vs_E18	CA3	0.276793
0.0487162	0.161859	1	Atrip	Virgin_vs_E18	CA3	0.278565
0.0488462	-0.10016	1	Ldb2	Virgin_vs_E18	CA3	0.278878
0.0488727	0.216195	1	Yeats2	Virgin_vs_E18	CA3	0.278878
0.0489182	0.118648	1	Pds5a	Virgin_vs_E18	CA3	0.278878
0.0489543	0.107504	1	Ap1s2	Virgin_vs_E18	CA3	0.278878
0.0489823	-0.200835	1	Camk1d	Virgin_vs_E18	CA3	0.278878
0.049051	0.0932135	1	Gabbr1	Virgin_vs_E18	CA3	0.278975
0.0490945	0.156095	1	Ap4e1	Virgin_vs_E18	CA3	0.278975
0.0492131	-0.130376	1	Gnaq	Virgin_vs_E18	CA3	0.278975
0.0492142	-0.19969	1	Hspa12a	Virgin_vs_E18	CA3	0.278975
0.0492189	0.192694	1	Lrba	Virgin_vs_E18	CA3	0.278975
0.0492865	-0.0280386	1	Mrps17	Virgin_vs_E18	CA3	0.278975
0.0492956	0.256991	1	Gm14296	Virgin_vs_E18	CA3	0.278975
0.0493889	-0.268685	1	Ppp2r2b	Virgin_vs_E18	CA3	0.279012
0.049406	0.0833656	1	Slc9a8	Virgin_vs_E18	CA3	0.279012
0.0494292	0.13601	1	Zfp942	Virgin_vs_E18	CA3	0.279012
0.0494766	-0.215814	1	Gopc	Virgin_vs_E18	CA3	0.279041
0.0497035	-0.248117	1	Capzb	Virgin_vs_E18	CA3	0.280048
0.0497703	-0.279548	1	Lmo3	Virgin_vs_E18	CA3	0.280048
0.0498216	0.164448	1	Ifi203	Virgin_vs_E18	CA3	0.280048
0.0498592	0.0839422	1	G530011O06Rik	Virgin_vs_E18	CA3	0.280048
0.0498675	-0.167991	1	Megf9	Virgin_vs_E18	CA3	0.280048
0.0500464	0.348721	1	Phf8	Virgin_vs_E18	CA3	0.280814
0.0501269	0.135909	1	Ilf2	Virgin_vs_E18	CA3	0.281026
0.050305	-0.225179	1	Cpsf7	Virgin_vs_E18	CA3	0.281732
0.0503383	-0.06851	1	Crtac1	Virgin_vs_E18	CA3	0.281732
0.0505186	-0.240691	1	D430019H16Rik	Virgin_vs_E18	CA3	0.282366
0.0505372	0.0328059	1	Trp53bp1	Virgin_vs_E18	CA3	0.282366
0.0505983	0.204563	1	Mrps10	Virgin_vs_E18	CA3	0.282468
0.0507759	0.0860917	1	Prkag1	Virgin_vs_E18	CA3	0.282883
0.050777	0.10508	1	Ppp1r15b	Virgin_vs_E18	CA3	0.282883
0.0508522	-0.194165	1	Car7	Virgin_vs_E18	CA3	0.282883
0.0509364	0.235415	1	Cmtr1	Virgin_vs_E18	CA3	0.282883
0.0509366	-0.169245	1	Ube2ql1	Virgin_vs_E18	CA3	0.282883
0.0509421	0.0423528	1	Agtpbp1	Virgin_vs_E18	CA3	0.282883
0.050973	0.135753	1	Hnrnpr	Virgin_vs_E18	CA3	0.282883
0.0510517	0.114388	1	Trim39	Virgin_vs_E18	CA3	0.282911
0.0510638	0.0890061	1	Lifr	Virgin_vs_E18	CA3	0.282911
0.0512808	0.0514901	1	Nrd1	Virgin_vs_E18	CA3	0.283874
0.0513876	-0.198668	1	Gng10	Virgin_vs_E18	CA3	0.284083
0.0514046	0.128398	1	Tex261	Virgin_vs_E18	CA3	0.284083
0.0515394	-0.102252	1	Nt5dc3	Virgin_vs_E18	CA3	0.284575
0.0515821	0.1507	1	Exoc6b	Virgin_vs_E18	CA3	0.284575
0.0516626	0.0528951	1	Rsrc2	Virgin_vs_E18	CA3	0.284575
0.0516664	-0.237505	1	Gna11	Virgin_vs_E18	CA3	0.284575
0.0518482	0.111771	1	Mrps26	Virgin_vs_E18	CA3	0.284859
0.0518574	0.0892018	1	Nudt16l1	Virgin_vs_E18	CA3	0.284859
0.0518633	-0.131478	1	2410002F23Rik	Virgin_vs_E18	CA3	0.284859
0.0518907	0.214999	1	D1Ertd622e	Virgin_vs_E18	CA3	0.284859
0.0519539	0.027864	1	Grb14	Virgin_vs_E18	CA3	0.284968
0.0520927	-0.247172	1	Svip	Virgin_vs_E18	CA3	0.285394
0.0521531	-0.187987	1	Nsg1	Virgin_vs_E18	CA3	0.285394
0.0521613	0.0780119	1	Mfsd4b5	Virgin_vs_E18	CA3	0.285394
0.0522488	-0.297302	1	Rnf2	Virgin_vs_E18	CA3	0.285635
0.0523576	-0.145209	1	Arl6ip1	Virgin_vs_E18	CA3	0.285714
0.0523864	0.111471	1	Fxr1	Virgin_vs_E18	CA3	0.285714
0.0524358	-0.17645	1	Trps1	Virgin_vs_E18	CA3	0.285714
0.0524364	0.212707	1	Gm26777	Virgin_vs_E18	CA3	0.285714
0.0524976	0.0306493	1	Pin1	Virgin_vs_E18	CA3	0.285811
0.0526945	-0.207335	1	5530601H04Rik	Virgin_vs_E18	CA3	0.286523
0.0527677	0.237803	1	Ccnc	Virgin_vs_E18	CA3	0.286523
0.0527967	-0.0768861	1	Olfm1	Virgin_vs_E18	CA3	0.286523
0.0528023	0.15487	1	Fus	Virgin_vs_E18	CA3	0.286523
0.0530916	0.381092	1	Pcsk7	Virgin_vs_E18	CA3	0.287856
0.0532654	0.12102	1	Wiz	Virgin_vs_E18	CA3	0.288561
0.0533494	-0.0488063	1	Reep2	Virgin_vs_E18	CA3	0.288779
0.0536422	-0.196659	1	Pcbp1	Virgin_vs_E18	CA3	0.290086
0.0536789	0.128848	1	Aff4	Virgin_vs_E18	CA3	0.290086
0.0537362	0.251777	1	Cyp4x1	Virgin_vs_E18	CA3	0.290158
0.053807	-0.190691	1	Slc35b4	Virgin_vs_E18	CA3	0.290302
0.0538898	-0.163698	1	Sv2a	Virgin_vs_E18	CA3	0.290512
0.053942	-0.256006	1	Sez6l2	Virgin_vs_E18	CA3	0.29053
0.0539814	0.0635414	1	Aagab	Virgin_vs_E18	CA3	0.29053
0.0540662	-0.0157394	1	Fam76b	Virgin_vs_E18	CA3	0.290749
0.0541244	-0.248353	1	Src	Virgin_vs_E18	CA3	0.290825
0.0542305	0.157181	1	Srprb	Virgin_vs_E18	CA3	0.290931
0.0542656	0.0624969	1	Prdm11	Virgin_vs_E18	CA3	0.290931
0.0542765	0.0778414	1	Ppp1r12a	Virgin_vs_E18	CA3	0.290931
0.0544294	0.214075	1	Jmjd1c	Virgin_vs_E18	CA3	0.291307
0.0544852	-0.188476	1	Gprin1	Virgin_vs_E18	CA3	0.291307
0.0544864	0.0453211	1	Atp8b2	Virgin_vs_E18	CA3	0.291307
0.0545846	0.239348	1	Rbm4b	Virgin_vs_E18	CA3	0.291307
0.054662	-0.243853	1	Dlg3	Virgin_vs_E18	CA3	0.291307
0.0547733	-0.1137	1	Cpne4	Virgin_vs_E18	CA3	0.291307
0.0547788	0.0748236	1	Gan	Virgin_vs_E18	CA3	0.291307
0.0547859	-0.0738018	1	Dvl1	Virgin_vs_E18	CA3	0.291307
0.0548686	0.0229565	1	Csmd1	Virgin_vs_E18	CA3	0.291307
0.0548725	0.179635	1	S100a3	Virgin_vs_E18	CA3	0.291307
0.0548878	0.0617556	1	A230050P20Rik	Virgin_vs_E18	CA3	0.291307
0.0548987	-0.159799	1	Pomk	Virgin_vs_E18	CA3	0.291307
0.0549764	-0.187023	1	Grsf1	Virgin_vs_E18	CA3	0.291307
0.0550056	-0.0797609	1	Fgf13	Virgin_vs_E18	CA3	0.291307
0.0550148	-0.265075	1	Slc9a6	Virgin_vs_E18	CA3	0.291307
0.0550537	-0.286959	1	Cend1	Virgin_vs_E18	CA3	0.291307
0.055144	0.131866	1	Apba1	Virgin_vs_E18	CA3	0.291551
0.0553885	-0.172894	1	Hnrnpa3	Virgin_vs_E18	CA3	0.29242
0.055401	0.208329	1	Taf3	Virgin_vs_E18	CA3	0.29242
0.0554935	0.043326	1	Nfat5	Virgin_vs_E18	CA3	0.29242
0.0555098	-0.0518366	1	Ntrk3	Virgin_vs_E18	CA3	0.29242
0.0555469	0.0823178	1	Golm1	Virgin_vs_E18	CA3	0.29242
0.0556039	-0.153507	1	Mctp1	Virgin_vs_E18	CA3	0.29242
0.0556718	0.178164	1	Cacnb2	Virgin_vs_E18	CA3	0.29242
0.0556948	0.0609199	1	Fopnl	Virgin_vs_E18	CA3	0.29242
0.0557074	0.0308223	1	Dctn5	Virgin_vs_E18	CA3	0.29242
0.0557844	0.154664	1	Rbm5	Virgin_vs_E18	CA3	0.292591
0.0562063	0.277013	1	Dzip1	Virgin_vs_E18	CA3	0.294448
0.0562531	-0.194944	1	Lrrc8d	Virgin_vs_E18	CA3	0.294448
0.0562725	-0.0986443	1	Exoc5	Virgin_vs_E18	CA3	0.294448
0.0563689	-0.0769503	1	Zcchc17	Virgin_vs_E18	CA3	0.294606
0.056392	0.188777	1	Tceal5	Virgin_vs_E18	CA3	0.294606
0.0564863	0.119846	1	Btg1	Virgin_vs_E18	CA3	0.294789
0.0565165	0.129613	1	Lias	Virgin_vs_E18	CA3	0.294789
0.0566349	0.180347	1	Ghdc	Virgin_vs_E18	CA3	0.295173
0.0568284	0.147061	1	Kcnn1	Virgin_vs_E18	CA3	0.295694
0.056846	-0.243512	1	Txndc17	Virgin_vs_E18	CA3	0.295694
0.0568694	0.108453	1	Tcf4	Virgin_vs_E18	CA3	0.295694
0.0572019	-0.23758	1	Wasl	Virgin_vs_E18	CA3	0.297091
0.0572282	-0.203406	1	Snrk	Virgin_vs_E18	CA3	0.297091
0.0573308	-0.16496	1	Fam131a	Virgin_vs_E18	CA3	0.29739
0.0576632	-0.169375	1	Adam11	Virgin_vs_E18	CA3	0.298878
0.0577578	-0.0814119	1	Cox8a	Virgin_vs_E18	CA3	0.299134
0.0579655	-0.0812248	1	Abi2	Virgin_vs_E18	CA3	0.299974
0.0580186	0.272579	1	N4bp2l1	Virgin_vs_E18	CA3	0.300013
0.058191	-0.155897	1	Scn1b	Virgin_vs_E18	CA3	0.300669
0.0584048	0.149543	1	Zcchc11	Virgin_vs_E18	CA3	0.301537
0.0586246	-0.18381	1	A830018L16Rik	Virgin_vs_E18	CA3	0.302435
0.0587917	0.069057	1	Slc5a3	Virgin_vs_E18	CA3	0.30306
0.0590027	-0.0719331	1	Ndnl2	Virgin_vs_E18	CA3	0.303716
0.059011	0.201983	1	Cspp1	Virgin_vs_E18	CA3	0.303716
0.0591494	-0.0692481	1	Anapc1	Virgin_vs_E18	CA3	0.30419
0.0592079	0.0106829	1	Zcchc7	Virgin_vs_E18	CA3	0.304254
0.0594582	-0.277044	1	Zfp664	Virgin_vs_E18	CA3	0.305302
0.0597593	-0.22587	1	Mib1	Virgin_vs_E18	CA3	0.306609
0.0599684	-0.162927	1	Mob4	Virgin_vs_E18	CA3	0.307443
0.0600561	0.142265	1	Zc3h7a	Virgin_vs_E18	CA3	0.307653
0.060224	-0.0977878	1	Naa35	Virgin_vs_E18	CA3	0.308038
0.0602518	0.127085	1	Msra	Virgin_vs_E18	CA3	0.308038
0.0602714	0.121475	1	Cacnb4	Virgin_vs_E18	CA3	0.308038
0.0604031	-0.225159	1	Ubr3	Virgin_vs_E18	CA3	0.308472
0.0605664	-0.207724	1	2210016L21Rik	Virgin_vs_E18	CA3	0.309067
0.0607839	-0.0226831	1	Cmpk1	Virgin_vs_E18	CA3	0.309849
0.0608137	0.213348	1	Fam214b	Virgin_vs_E18	CA3	0.309849
0.0610442	0.0858612	1	Prmt2	Virgin_vs_E18	CA3	0.310784
0.0613286	0.0224097	1	Bzrap1	Virgin_vs_E18	CA3	0.311941
0.0613663	-0.0879239	1	Snx30	Virgin_vs_E18	CA3	0.311941
0.0614575	0.201345	1	Gm37065	Virgin_vs_E18	CA3	0.312164
0.0615508	-0.198303	1	Ndufa10	Virgin_vs_E18	CA3	0.312398
0.0617034	0.0713015	1	Nom1	Virgin_vs_E18	CA3	0.312731
0.0617227	0.0945299	1	Trmt2a	Virgin_vs_E18	CA3	0.312731
0.0617589	-0.258756	1	Gga2	Virgin_vs_E18	CA3	0.312731
0.0619318	0.192252	1	Ybey	Virgin_vs_E18	CA3	0.313366
0.0620021	0.0987321	1	Adora3	Virgin_vs_E18	CA3	0.313482
0.062051	0.110103	1	Npc2	Virgin_vs_E18	CA3	0.313488
0.0621197	-0.140501	1	Rab10	Virgin_vs_E18	CA3	0.313595
0.0622362	0.181647	1	Srp72	Virgin_vs_E18	CA3	0.313943
0.0624077	-0.073108	1	Ap3b2	Virgin_vs_E18	CA3	0.314567
0.0625977	-0.212125	1	E430025E21Rik	Virgin_vs_E18	CA3	0.315284
0.0633225	0.0699467	1	Rnf182	Virgin_vs_E18	CA3	0.317956
0.0633292	-0.151956	1	Ppm1e	Virgin_vs_E18	CA3	0.317956
0.063336	0.0281758	1	Parn	Virgin_vs_E18	CA3	0.317956
0.0633445	-0.237808	1	Neto1	Virgin_vs_E18	CA3	0.317956
0.0633694	0.0384473	1	Slc38a2	Virgin_vs_E18	CA3	0.317956
0.0635383	-0.197509	1	6330403A02Rik	Virgin_vs_E18	CA3	0.318561
[truncated: 5,278 more rows]

## Sheet: CA3 VvsPP
p_val	avg_log2FC	p_val_adj	gene	comparison	celltype	fdr
[truncated: 6,513 more rows]

[truncated: 22 more sheets: CA3 E18vsPP, DG VvsE18, DG VvsPP, DG E18vsPP, Pvalb VvsE18, Pvalb VvsPP, Pvalb E18vsPP, Oligo VvsE18, Oligo VvsPP, Oligo E18vsPP, Sst VvsE18, Sst VvsPP, Sst E18vsPP, Astro VvsE18, Astro VvsPP, Astro E18vsPP, GABA VvsE18, GABA VvsPP, GABA E18vsPP, Gluta VvsE18 …]
